# Supplementary material for: Identifying gene function and module connections by the integration of multispecies expression compendia
Source: PubMed Central journal article supplement — Genome Res. 2019 Dec;29(12):2034–45. doi: 10.1101/gr.251983.119 (PMC6886503; doi:10.1101/gr.251983.119), 2019-12
Supplement: supp_gr.251983.119_Supplemental_Fig_S2.pdf [file supp_gr.251983.119_Supplemental_Fig_S2.pdf]

## Figure S2

GTEx hippocampus

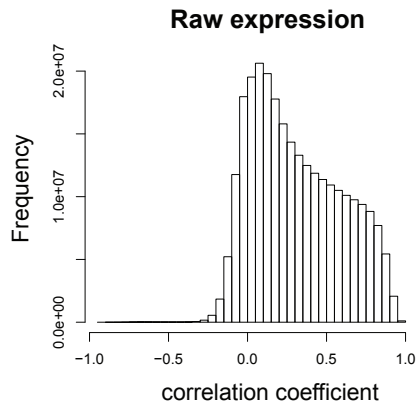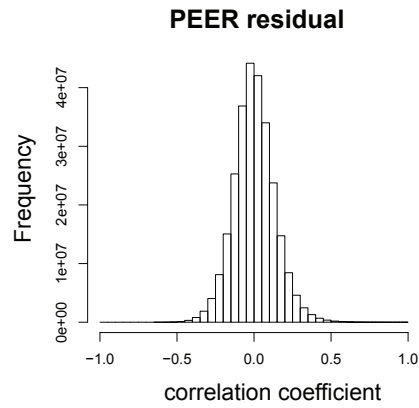

GTEx hypothalamus

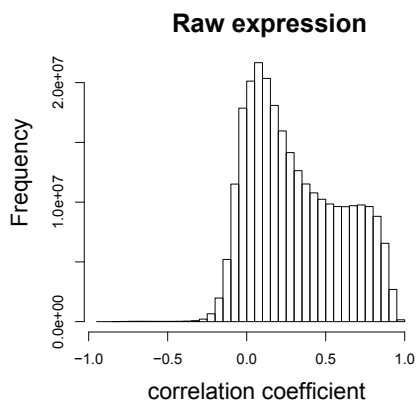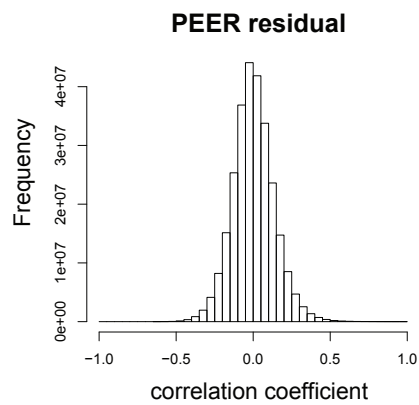

### Figure S2. Covariates in expression datasets affects the co-expressions between genes.

The hippocampus (**upper**) and hypothalamus (**lower**) datasets from GTEx were used as examples to illustrate the influence of covariates in the co-expressions between genes. The distributions of correlation coefficient of all gene pairs from either the raw expression data (**left**) or expression residual from PEER (**right**) were compared.
