# Supplementary material for: Identifying gene function and module connections by the integration of multispecies expression compendia
Source: PubMed Central journal article supplement — Genome Res. 2019 Dec;29(12):2034–45. doi: 10.1101/gr.251983.119 (PMC6886503; doi:10.1101/gr.251983.119), 2019-12
Supplement: supp_gr.251983.119_Supplemental_Fig_S6.pdf [file supp_gr.251983.119_Supplemental_Fig_S6.pdf]

## Figure S6

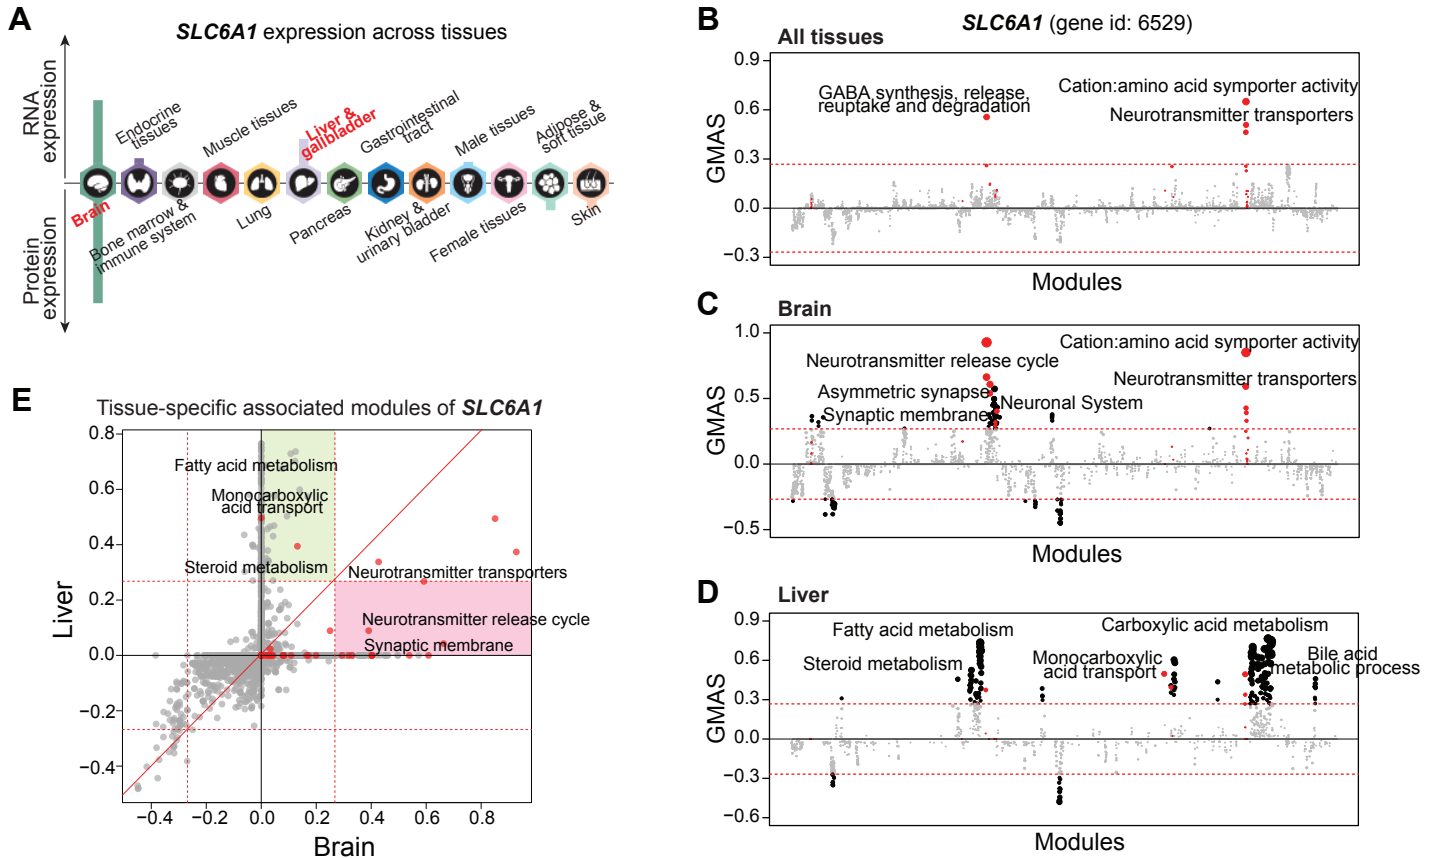

**Figure S6. G-MAD identifies tissue-specific associated modules for *SLC6A1* by using datasets from different tissues.**

**A**, Expression patterns of *SLC6A1* across tissues. The figure was adapted from the Human Protein Atlas.

**B-D**, G-MAD of *SLC6A1* in human using datasets from all tissues (**B**), from brain (**C**), or from liver (**D**). The threshold of significant gene-module association is indicated by the red dashed line. Modules are organized by their similarities. Known modules connected to *SLC6A1* from gene annotations are shown in red dots, and other modules with GMAS over the threshold are shown by black dots.

**E**, Comparison of G-MAD results of *SLC6A1* in brain and liver. Known modules connected to *SLC6A1* are shown in red dots. The threshold of significant gene-module association is indicated by the red dashed line. Modules significantly associated with *SLC6A1* only in one specific tissue are highlighted. The comparison of the association results of *SLC6A1* in brain and liver can be found at Supplemental Table **S4**.
