# Supplementary material for: Identifying gene function and module connections by the integration of multispecies expression compendia
Source: PubMed Central journal article supplement — Genome Res. 2019 Dec;29(12):2034–45. doi: 10.1101/gr.251983.119 (PMC6886503; doi:10.1101/gr.251983.119), 2019-12
Supplement: supp_gr.251983.119_Supplemental_Fig_S8.pdf [file supp_gr.251983.119_Supplemental_Fig_S8.pdf]

## Figure S8

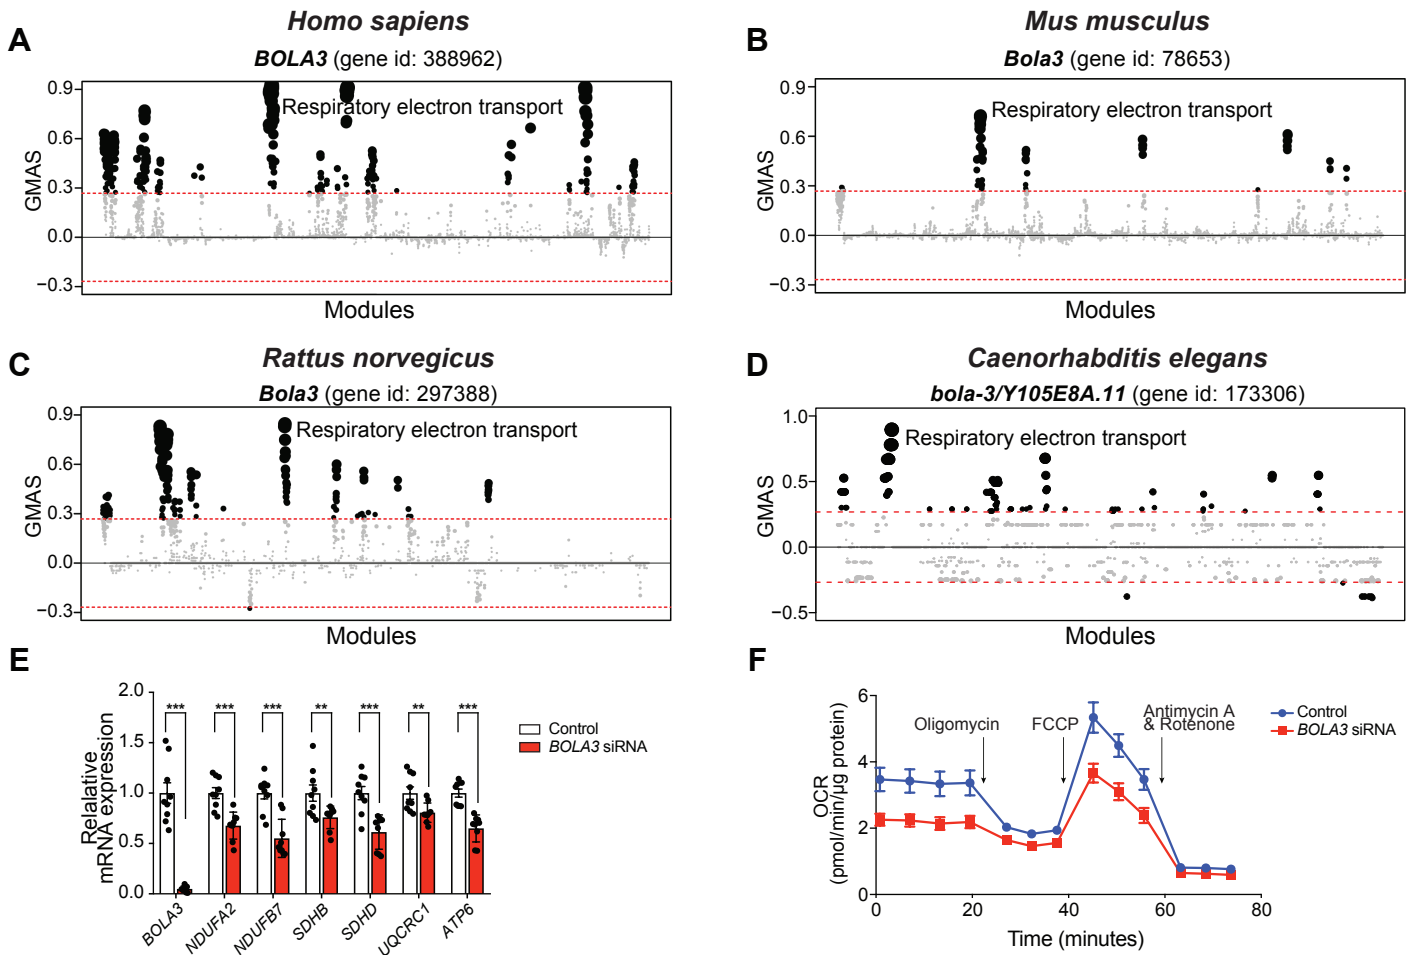

### Figure S8. G-MAD confirms the involvement of *BOLA3* in mitochondrial respiration.

**A-D**, *BOLA3/Bola3/bola-3* associates with mitochondrial respiratory chain modules in human (**A**), mouse (**B**), rat (**C**), and *C. elegans* (**D**). The threshold of significant gene-module association is indicated by the red dashed line. Modules are organized by module similarities. Known modules connected to *BOLA3/Bola3/bola-3* from annotations are highlighted in red (no connected modules for *BOLA3/Bola3/bola-3*), and other modules with GMAS over the threshold are colored in black. Dot sizes reflect the GMAS of *BOLA3* against the respective modules.

**E**, Silencing *BOLA3* expression in HEK293 cells decreases expression levels of indicated genes involved in mitochondrial respiratory chain complexes. Error bars represent standard errors. \*,  $p < 0.05$ ; \*\*,  $p < 0.01$ ; \*\*\*,  $p < 0.001$ .  $n=9$ .

**F**, *BOLA3* knockdown leads to the reduction of oxygen consumption rate (OCR) as a reflection of mitochondrial respiration activity in human HEK293 cells. Addition of specific mitochondrial inhibitors, including the oligomycin (ATPase inhibitor), FCCP (uncoupling agent), and rotenone/antimycin A (electron transport chain inhibitors) are indicated.
