# Supplementary material for: Identifying gene function and module connections by the integration of multispecies expression compendia
Source: PubMed Central journal article supplement — Genome Res. 2019 Dec;29(12):2034–45. doi: 10.1101/gr.251983.119 (PMC6886503; doi:10.1101/gr.251983.119), 2019-12
Supplement: supp_gr.251983.119_Supplemental_Fig_S9.pdf [file supp_gr.251983.119_Supplemental_Fig_S9.pdf]

## Figure S9

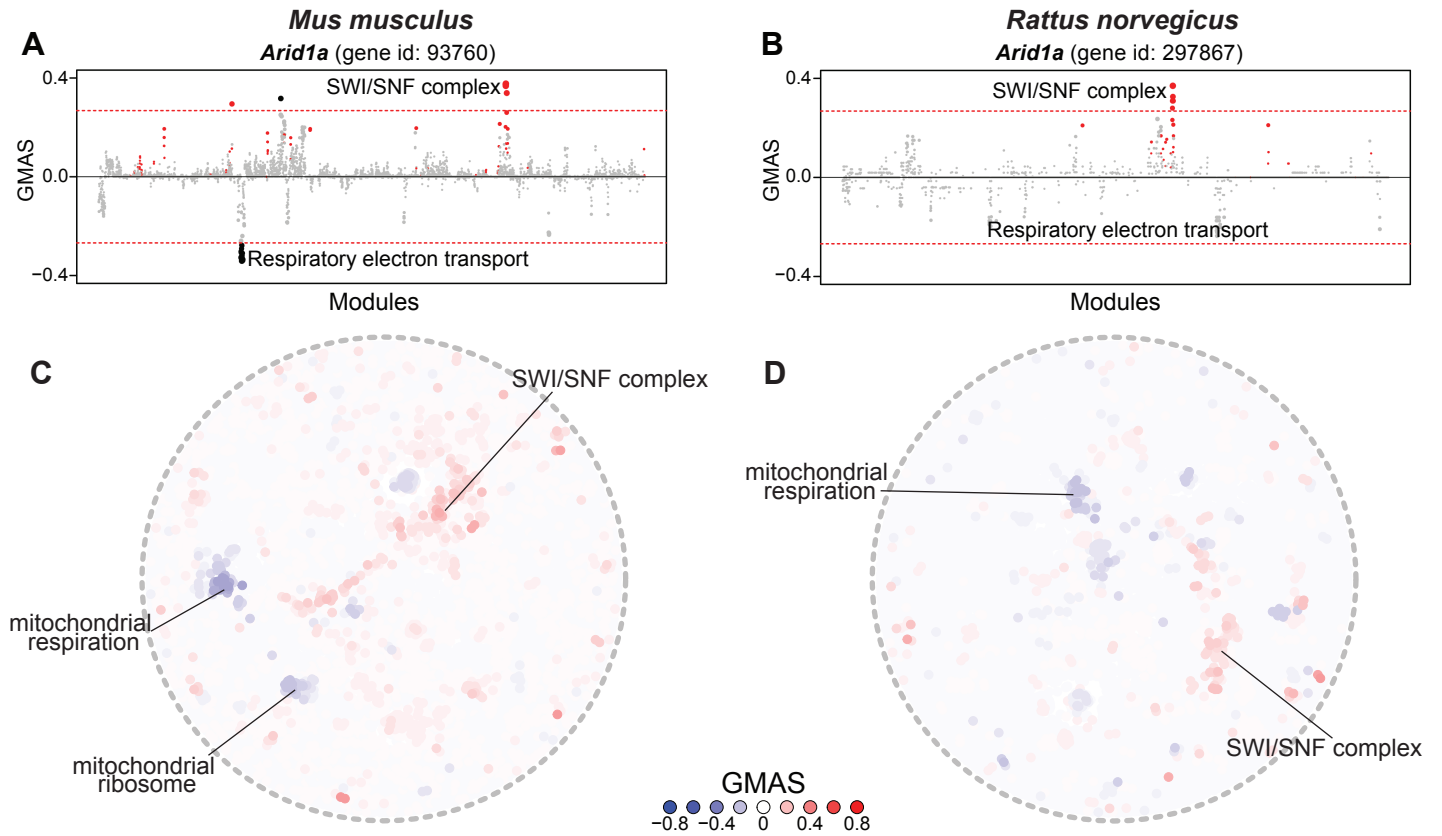

**Figure S9. G-MAD verifies the negative association of *Arid1a* with mitochondrial respiration in mouse and rat.**

**A, B**, G-MAD of *Arid1a* in mouse (**A**) and rat (**B**) confirms its negative association with mitochondrial respiratory chain. The threshold of significant gene-module association is indicated by the red dashed line; note that the associations are only suggestive in the mouse. Modules are organized by their similarities. Known modules connected to *Arid1a* from gene annotations are shown in red dots, and other modules with GMAS over the threshold are shown by black dots.

**C, D**, Network plot showing the significantly connected modules of *Arid1a* in mouse (**C**) and rat (**D**). Modules are colored based on their GMAS against *Arid1a*.
