# Supplementary material for: Identifying gene function and module connections by the integration of multispecies expression compendia
Source: PubMed Central journal article supplement — Genome Res. 2019 Dec;29(12):2034–45. doi: 10.1101/gr.251983.119 (PMC6886503; doi:10.1101/gr.251983.119), 2019-12
Supplement: supp_gr.251983.119_Supplemental_Fig_S10.pdf [file supp_gr.251983.119_Supplemental_Fig_S10.pdf]

# Figure S10

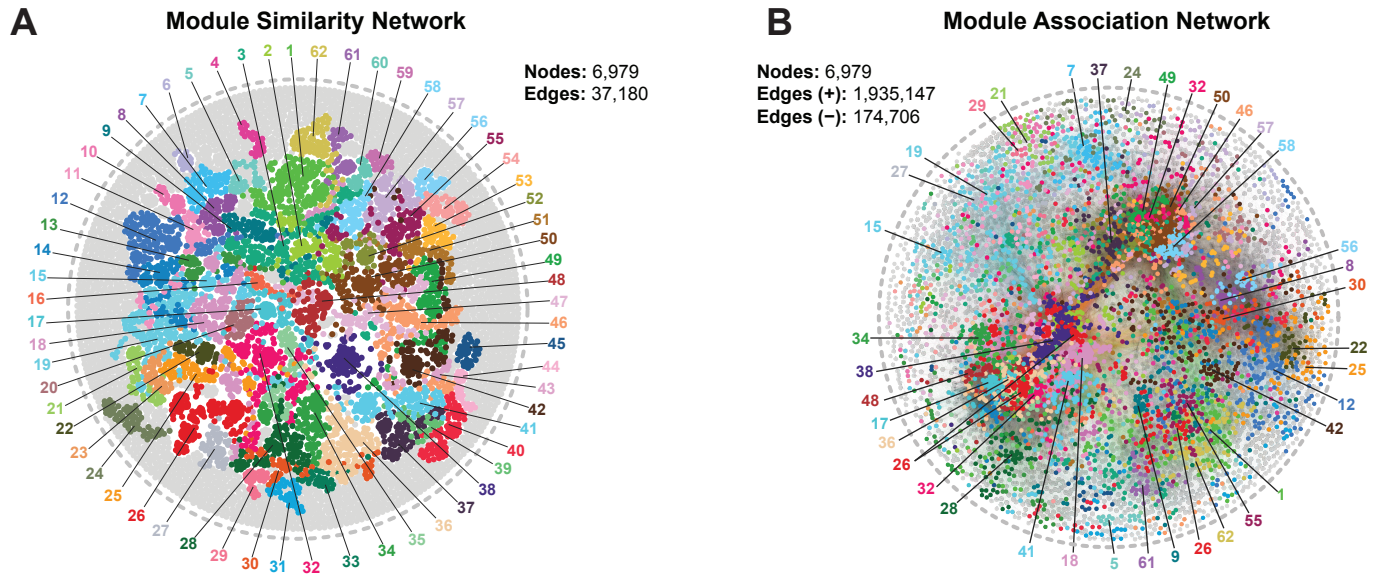

**Figure S10. Comparison of module similarity network and module association network.** Module network obtained from module similarity (**A**) and association (**B**; M-MAD) were put together to facilitate the comparison.
