# Supplementary material for: Identifying gene function and module connections by the integration of multispecies expression compendia
Source: PubMed Central journal article supplement — Genome Res. 2019 Dec;29(12):2034–45. doi: 10.1101/gr.251983.119 (PMC6886503; doi:10.1101/gr.251983.119), 2019-12
Supplement: supp_gr.251983.119_Supplemental_Fig_S11.pdf [file supp_gr.251983.119_Supplemental_Fig_S11.pdf]

**Figure S11**

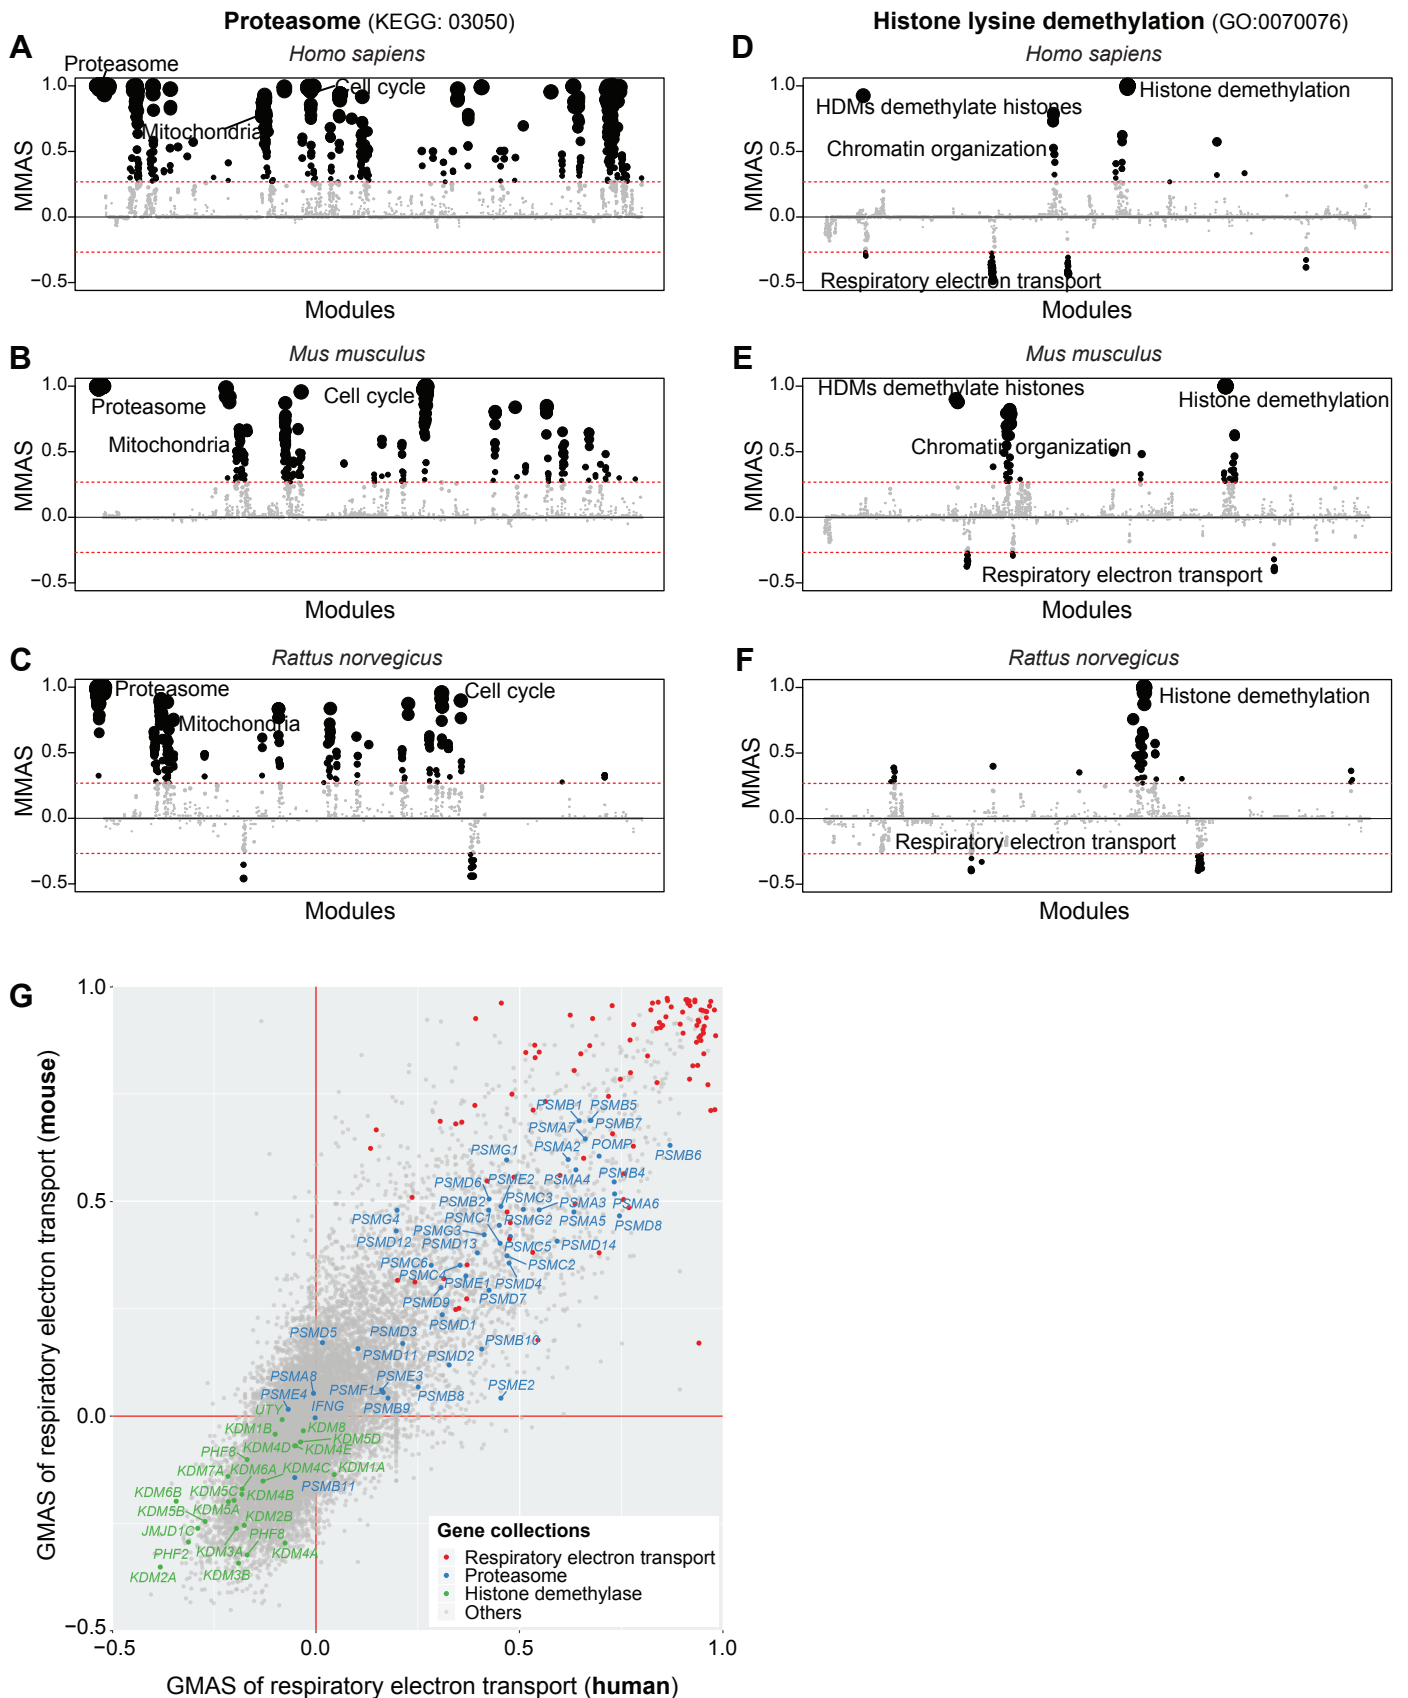

**Figure S11. M-MAD and G-MAD identify the connections between respiratory electron transport chain and proteasome, as well as histone lysine demethylation.**

**A-F**, M-MAD results for proteasome (**A-C**) and histone lysine demethylation (**D-F**) in human (**A, D**), mouse (**B, E**), and rat (**C, F**). The threshold of significant module-module connection is indicated by the red dashed line. Modules are organized by the module similarities. Dot sizes are proportional to MMAS of the respective modules.

**G**, G-MAD results for electron transport chain from human and mouse are plotted in the x and y axes, respectively. Genes annotated to be involved in respective modules are indicated in different colors.
