# Supplementary material for: Identifying gene function and module connections by the integration of multispecies expression compendia
Source: HighWire-hosted journal article supplement (doi:10.1101/gr.251983.119), 2019-11-21
Supplement: Supplemental_Table_S1.xlsx [file Supplemental_Table_S1.xlsx]

## Sheet: Title
Supplemental Table S1. Datasets used in this study.

## Sheet: human
Source	internal_ID	identifier	tissue	sample size
GEO	human--GEO--GSE24294	GSE24294	adipose	848
GEO	human--GEO--GSE70353	GSE70353	adipose	770
GEO	human--GEO--GSE24297	GSE24297	adipose	701
GEO	human--GEO--GSE7965-Adipose	GSE7965	adipose	701
GTEx	human--GTEx--Adipose_Subcutaneous	Adipose_Subcutaneous	adipose	385
GEO	human--GEO--GSE95640	GSE95640	adipose	382
GEO	human--GEO--GSE27916	GSE27916	adipose	375
GTEx	human--GTEx--Adipose_Visceral_Omentum	Adipose_Visceral_Omentum	adipose	313
GEO	human--GEO--GSE95674	GSE95674	adipose	256
GEO	human--GEO--GSE90749	GSE90749	adipose	205
GEO	human--GEO--GSE32512	GSE32512	adipose	204
GEO	human--GEO--GSE62199	GSE62199	adipose	201
GEO	human--GEO--GSE27666	GSE27666	adipose	175
GEO	human--GEO--GSE58559	GSE58559	adipose	170
GEO	human--GEO--GSE10545	GSE10545	adipose	157
GEO	human--GEO--GSE77962	GSE77962	adipose	152
GEO	human--GEO--GSE30929	GSE30929	adipose	140
GEO	human--GEO--GSE65221	GSE65221	adipose	136
GEO	human--GEO--GSE56716	GSE56716	adipose	112
GEO	human--GEO--GSE6481	GSE6481	adipose	105
GEO	human--GEO--GSE62117	GSE62117	adipose	102
GEO	human--GEO--GSE40589	GSE40589	adipose	96
GEO	human--GEO--GSE43471	GSE43471	adipose	96
GEO	human--GEO--GSE19494	GSE19494	adipose	88
GEO	human--GEO--GSE61093	GSE61093	adipose	86
GEO	human--GEO--GSE13070-subcutaneousadiposetissue	GSE13070	adipose	84
GEO	human--GEO--GSE41168-adiposetissue	GSE41168	adipose	70
GEO	human--GEO--GSE40231-Visceral_fat	GSE40231	adipose	66
GEO	human--GEO--GSE73439-visceral	GSE73439	adipose	51
GEO	human--GEO--GSE73439-subcutaneous	GSE73439	adipose	51
GEO	human--GEO--GSE65904-subcutaneous	GSE65904	adipose	33
GTEx	human--GTEx--Adrenal_Gland	Adrenal_Gland	adrenal gland	175
GEO	human--GEO--GSE30169	GSE30169	artery	629
GTEx	human--GTEx--Artery_Tibial	Artery_Tibial	artery	388
GTEx	human--GTEx--Artery_Aorta	Artery_Aorta	artery	267
GTEx	human--GTEx--Artery_Coronary	Artery_Coronary	artery	152
GEO	human--GEO--GSE11917	GSE11917	artery	105
GEO	human--GEO--GSE26155	GSE26155	artery	96
GEO	human--GEO--GSE40231-Internal_mammary_artery	GSE40231	artery	40
GEO	human--GEO--GSE32894	GSE32894	bladder	308
GEO	human--GEO--GSE83586	GSE83586	bladder	307
GEO	human--GEO--GSE13507	GSE13507	bladder	256
GEO	human--GEO--GSE86411	GSE86411	bladder	132
GEO	human--GEO--GSE32548	GSE32548	bladder	131
GEO	human--GEO--GSE31684	GSE31684	bladder	93
GEO	human--GEO--GSE31189	GSE31189	bladder	92
GEO	human--GEO--GSE48276	GSE48276	bladder	84
GEO	human--GEO--GSE48075	GSE48075	bladder	33
GEO	human--GEO--GSE65907	GSE65907	blood	2112
GEO	human--GEO--GSE20142	GSE20142	blood	1240
GEO	human--GEO--GSE56045	GSE56045	blood	1202
GEO	human--GEO--GSE31161	GSE31161	blood	1035
GEO	human--GEO--GSE7965-Blood	GSE7965	blood	1021
GEO	human--GEO--GSE36382	GSE36382	blood	991
GEO	human--GEO--GSE89403	GSE89403	blood	914
GEO	human--GEO--GSE33828	GSE33828	blood	881
GEO	human--GEO--GSE68310	GSE68310	blood	880
GEO	human--GEO--GSE36809	GSE36809	blood	857
GEO	human--GEO--GSE53195	GSE53195	blood	857
GEO	human--GEO--GSE45291	GSE45291	blood	805
GEO	human--GEO--GSE65682	GSE65682	blood	802
GEO	human--GEO--GSE82042	GSE82042	blood	786
GEO	human--GEO--GSE48348	GSE48348	blood	734
GEO	human--GEO--GSE32651	GSE32651	blood	717
GEO	human--GEO--GSE48152	GSE48152	blood	705
GEO	human--GEO--GSE19301	GSE19301	blood	685
GEO	human--GEO--GSE52428	GSE52428	blood	649
GEO	human--GEO--GSE83503	GSE83503	blood	602
GEO	human--GEO--GSE37069	GSE37069	blood	590
GEO	human--GEO--GSE89292	GSE89292	blood	583
GEO	human--GEO--GSE66702	GSE66702	blood	581
GEO	human--GEO--GSE103147-Monocytes	GSE103147	blood	573
GEO	human--GEO--GSE61240	GSE61240	blood	550
GEO	human--GEO--GSE13159-blood	GSE13159	blood	540
GEO	human--GEO--GSE15258	GSE15258	blood	540
GEO	human--GEO--GSE37250	GSE37250	blood	537
GEO	human--GEO--GSE99039	GSE99039	blood	505
GEO	human--GEO--GSE81046	GSE81046	blood	503
GEO	human--GEO--GSE56033	GSE56033	blood	499
GEO	human--GEO--GSE69683	GSE69683	blood	498
GEO	human--GEO--GSE64711	GSE64711	blood	495
GEO	human--GEO--GSE56034	GSE56034	blood	485
GEO	human--GEO--GSE66175	GSE66175	blood	480
GEO	human--GEO--GSE60767	GSE60767	blood	466
GEO	human--GEO--GSE29385	GSE29385	blood	465
GEO	human--GEO--GSE39445	GSE39445	blood	438
GEO	human--GEO--GSE56768	GSE56768	blood	435
GEO	human--GEO--GSE70784	GSE70784	blood	432
GEO	human--GEO--GSE72605	GSE72605	blood	431
GEO	human--GEO--GSE48023	GSE48023	blood	417
GEO	human--GEO--GSE4581	GSE4581	blood	414
GEO	human--GEO--GSE107437	GSE107437	blood	410
GEO	human--GEO--GSE29536	GSE29536	blood	410
GEO	human--GEO--GSE61821	GSE61821	blood	402
GEO	human--GEO--GSE20686	GSE20686	blood	393
GEO	human--GEO--GSE48762-vein	GSE48762	blood	387
GEO	human--GEO--GSE63061	GSE63061	blood	385
GEO	human--GEO--GSE46097	GSE46097	blood	378
GEO	human--GEO--GSE74143	GSE74143	blood	377
GTEx	human--GTEx--Whole_Blood	Whole_Blood	blood	369
GEO	human--GEO--GSE25742	GSE25742	blood	365
GEO	human--GEO--GSE111368	GSE111368	blood	359
GEO	human--GEO--GSE40165	GSE40165	blood	358
GEO	human--GEO--GSE43488	GSE43488	blood	356
GEO	human--GEO--GSE79362	GSE79362	blood	355
GEO	human--GEO--GSE83951	GSE83951	blood	348
GEO	human--GEO--GSE63881	GSE63881	blood	341
GEO	human--GEO--GSE49925	GSE49925	blood	338
GEO	human--GEO--GSE39940	GSE39940	blood	334
GEO	human--GEO--GSE46734	GSE46734	blood	330
GEO	human--GEO--GSE97356	GSE97356	blood	324
GEO	human--GEO--GSE35007	GSE35007	blood	310
GEO	human--GEO--GSE28988	GSE28988	blood	306
GEO	human--GEO--GSE67784	GSE67784	blood	305
GEO	human--GEO--GSE10358	GSE10358	blood	304
GEO	human--GEO--GSE53351	GSE53351	blood	301
GEO	human--GEO--GSE58211	GSE58211	blood	300
GEO	human--GEO--GSE32472	GSE32472	blood	299
GEO	human--GEO--GSE42606	GSE42606	blood	299
GEO	human--GEO--GSE61804	GSE61804	blood	299
GEO	human--GEO--GSE1159	GSE1159	blood	293
GEO	human--GEO--GSE47353	GSE47353	blood	292
GEO	human--GEO--GSE103500	GSE103500	blood	291
GEO	human--GEO--GSE13255	GSE13255	blood	291
GEO	human--GEO--GSE45792	GSE45792	blood	291
GEO	human--GEO--GSE45987	GSE45987	blood	291
GEO	human--GEO--GSE24702	GSE24702	blood	290
GEO	human--GEO--GSE28497	GSE28497	blood	288
GEO	human--GEO--GSE79396	GSE79396	blood	288
GEO	human--GEO--GSE48113	GSE48113	blood	287
GEO	human--GEO--GSE52724	GSE52724	blood	286
GEO	human--GEO--GSE74813	GSE74813	blood	286
GEO	human--GEO--GSE64456	GSE64456	blood	285
GEO	human--GEO--GSE68086	GSE68086	blood	285
GEO	human--GEO--GSE63990	GSE63990	blood	280
GEO	human--GEO--GSE22098	GSE22098	blood	274
GEO	human--GEO--GSE58613	GSE58613	blood	264
GEO	human--GEO--GSE9782	GSE9782	blood	264
GEO	human--GEO--GSE67039	GSE67039	blood	263
GEO	human--GEO--GSE36911	GSE36911	blood	262
GEO	human--GEO--GSE69051	GSE69051	blood	250
GEO	human--GEO--GSE37824	GSE37824	blood	249
GEO	human--GEO--GSE104640	GSE104640	blood	248
GEO	human--GEO--GSE56931	GSE56931	blood	248
GEO	human--GEO--GSE30210	GSE30210	blood	247
GEO	human--GEO--GSE17755	GSE17755	blood	244
GEO	human--GEO--GSE66214	GSE66214	blood	243
GEO	human--GEO--GSE16214	GSE16214	blood	240
GEO	human--GEO--GSE72809	GSE72809	blood	240
GEO	human--GEO--GSE72829	GSE72829	blood	240
GEO	human--GEO--GSE37025	GSE37025	blood	235
GEO	human--GEO--GSE48762-finger	GSE48762	blood	234
GEO	human--GEO--GSE49758	GSE49758	blood	234
GEO	human--GEO--GSE74975	GSE74975	blood	230
GEO	human--GEO--GSE20332	GSE20332	blood	229
GEO	human--GEO--GSE45986	GSE45986	blood	229
GEO	human--GEO--GSE51528	GSE51528	blood	229
GEO	human--GEO--GSE56767	GSE56767	blood	229
GEO	human--GEO--GSE32215	GSE32215	blood	228
GEO	human--GEO--GSE47728	GSE47728	blood	228
GEO	human--GEO--GSE47729	GSE47729	blood	228
GEO	human--GEO--GSE13904	GSE13904	blood	227
GEO	human--GEO--GSE76008	GSE76008	blood	227
GEO	human--GEO--GSE76009	GSE76009	blood	227
GEO	human--GEO--GSE54837	GSE54837	blood	226
GEO	human--GEO--GSE79533	GSE79533	blood	226
GEO	human--GEO--GSE35455	GSE35455	blood	224
GEO	human--GEO--GSE12288	GSE12288	blood	222
GEO	human--GEO--GSE51092	GSE51092	blood	222
GEO	human--GEO--GSE50006	GSE50006	blood	220
GEO	human--GEO--GSE89408	GSE89408	blood	218
GEO	human--GEO--GSE45468	GSE45468	blood	216
GEO	human--GEO--GSE56580	GSE56580	blood	214
GEO	human--GEO--GSE73378	GSE73378	blood	210
GEO	human--GEO--GSE107015	GSE107015	blood	209
GEO	human--GEO--GSE78068	GSE78068	blood	209
GEO	human--GEO--GSE45603	GSE45603	blood	208
GEO	human--GEO--GSE55447	GSE55447	blood	208
GEO	human--GEO--GSE25001	GSE25001	blood	206
GEO	human--GEO--GSE26366	GSE26366	blood	206
GEO	human--GEO--GSE56766	GSE56766	blood	206
GEO	human--GEO--GSE69529	GSE69529	blood	206
GEO	human--GEO--GSE80060	GSE80060	blood	206
GEO	human--GEO--GSE100833-blood	GSE100833	blood	204
GEO	human--GEO--GSE11135	GSE11135	blood	204
GEO	human--GEO--GSE40553	GSE40553	blood	204
GEO	human--GEO--GSE35713	GSE35713	blood	203
GEO	human--GEO--GSE38484	GSE38484	blood	202
GEO	human--GEO--GSE83456	GSE83456	blood	202
GEO	human--GEO--GSE72376	GSE72376	blood	200
GEO	human--GEO--GSE20681	GSE20681	blood	198
GEO	human--GEO--GSE59206	GSE59206	blood	198
GEO	human--GEO--GSE68759	GSE68759	blood	198
GEO	human--GEO--GSE73502	GSE73502	blood	198
GEO	human--GEO--GSE11908	GSE11908	blood	197
GEO	human--GEO--GSE13576	GSE13576	blood	197
GEO	human--GEO--GSE46480	GSE46480	blood	196
GEO	human--GEO--GSE52166	GSE52166	blood	196
GEO	human--GEO--GSE53543	GSE53543	blood	196
GEO	human--GEO--GSE13501	GSE13501	blood	195
GEO	human--GEO--GSE20680	GSE20680	blood	195
GEO	human--GEO--GSE17065	GSE17065	blood	194
GEO	human--GEO--GSE98793	GSE98793	blood	192
GEO	human--GEO--GSE40012	GSE40012	blood	190
GEO	human--GEO--GSE35846	GSE35846	blood	189
GEO	human--GEO--GSE68049	GSE68049	blood	189
GEO	human--GEO--GSE108363	GSE108363	blood	186
GEO	human--GEO--GSE11375	GSE11375	blood	184
GEO	human--GEO--GSE26049	GSE26049	blood	181
GEO	human--GEO--GSE32909	GSE32909	blood	180
GEO	human--GEO--GSE68004	GSE68004	blood	180
GEO	human--GEO--GSE70603	GSE70603	blood	180
GEO	human--GEO--GSE48801	GSE48801	blood	179
GEO	human--GEO--GSE68527	GSE68527	blood	178
GEO	human--GEO--GSE19743	GSE19743	blood	177
GEO	human--GEO--GSE49454	GSE49454	blood	177
GEO	human--GEO--GSE58636	GSE58636	blood	177
GEO	human--GEO--GSE74816	GSE74816	blood	177
GEO	human--GEO--GSE39754	GSE39754	blood	176
GEO	human--GEO--GSE12995	GSE12995	blood	175
GEO	human--GEO--GSE62627	GSE62627	blood	174
GEO	human--GEO--GSE93606	GSE93606	blood	174
GEO	human--GEO--GSE635	GSE635	blood	173
GEO	human--GEO--GSE77344	GSE77344	blood	172
GEO	human--GEO--GSE66705	GSE66705	blood	171
GEO	human--GEO--GSE9372	GSE9372	blood	171
GEO	human--GEO--GSE48558	GSE48558	blood	170
GEO	human--GEO--GSE82023	GSE82023	blood	170
GEO	human--GEO--GSE65834	GSE65834	blood	169
GEO	human--GEO--GSE69597	GSE69597	blood	169
GEO	human--GEO--GSE56960	GSE56960	blood	168
GEO	human--GEO--GSE97741	GSE97741	blood	166
GEO	human--GEO--GSE72377	GSE72377	blood	165
GEO	human--GEO--GSE29619	GSE29619	blood	163
GEO	human--GEO--GSE54514	GSE54514	blood	163
GEO	human--GEO--GSE83632	GSE83632	blood	163
GEO	human--GEO--GSE20189	GSE20189	blood	162
GEO	human--GEO--GSE6477	GSE6477	blood	162
GEO	human--GEO--GSE100665	GSE100665	blood	161
GEO	human--GEO--GSE39506	GSE39506	blood	161
GEO	human--GEO--GSE40570	GSE40570	blood	160
GEO	human--GEO--GSE66795	GSE66795	blood	160
GEO	human--GEO--GSE7638	GSE7638	blood	160
GEO	human--GEO--GSE60244	GSE60244	blood	158
GEO	human--GEO--GSE39939	GSE39939	blood	157
GEO	human--GEO--GSE59654	GSE59654	blood	156
GEO	human--GEO--GSE67427	GSE67427	blood	155
GEO	human--GEO--GSE110160	GSE110160	blood	154
GEO	human--GEO--GSE110174	GSE110174	blood	154
GEO	human--GEO--GSE26281	GSE26281	blood	154
GEO	human--GEO--GSE49921	GSE49921	blood	154
GEO	human--GEO--GSE34404	GSE34404	blood	153
GEO	human--GEO--GSE39411	GSE39411	blood	152
GEO	human--GEO--GSE69034	GSE69034	blood	150
GEO	human--GEO--GSE69686	GSE69686	blood	149
GEO	human--GEO--GSE111176	GSE111176	blood	147
GEO	human--GEO--GSE42133	GSE42133	blood	147
GEO	human--GEO--GSE72810	GSE72810	blood	146
GEO	human--GEO--GSE100430	GSE100430	blood	145
GEO	human--GEO--GSE17048	GSE17048	blood	144
GEO	human--GEO--GSE21862	GSE21862	blood	144
GEO	human--GEO--GSE32707	GSE32707	blood	144
GEO	human--GEO--GSE86216	GSE86216	blood	144
GEO	human--GEO--GSE8991	GSE8991	blood	144
GEO	human--GEO--GSE30119	GSE30119	blood	143
GEO	human--GEO--GSE90074	GSE90074	blood	143
GEO	human--GEO--GSE39088	GSE39088	blood	142
GEO	human--GEO--GSE57475	GSE57475	blood	142
GEO	human--GEO--GSE67311	GSE67311	blood	142
GEO	human--GEO--GSE83393	GSE83393	blood	142
GEO	human--GEO--GSE50943	GSE50943	blood	141
GEO	human--GEO--GSE33463	GSE33463	blood	140
GEO	human--GEO--GSE37642	GSE37642	blood	140
GEO	human--GEO--GSE79545	GSE79545	blood	139
GEO	human--GEO--GSE54629	GSE54629	blood	138
GEO	human--GEO--GSE69528	GSE69528	blood	138
GEO	human--GEO--GSE38611	GSE38611	blood	136
GEO	human--GEO--GSE31348	GSE31348	blood	135
GEO	human--GEO--GSE73578	GSE73578	blood	133
GEO	human--GEO--GSE11501	GSE11501	blood	132
GEO	human--GEO--GSE19738	GSE19738	blood	132
GEO	human--GEO--GSE48000	GSE48000	blood	132
GEO	human--GEO--GSE88796	GSE88796	blood	132
GEO	human--GEO--GSE19151	GSE19151	blood	131
GEO	human--GEO--GSE35571	GSE35571	blood	131
GEO	human--GEO--GSE26440	GSE26440	blood	130
GEO	human--GEO--GSE35784	GSE35784	blood	130
GEO	human--GEO--GSE38627	GSE38627	blood	130
GEO	human--GEO--GSE39671	GSE39671	blood	130
GEO	human--GEO--GSE5678	GSE5678	blood	130
GEO	human--GEO--GSE2351	GSE2351	blood	129
GEO	human--GEO--GSE42002	GSE42002	blood	129
GEO	human--GEO--GSE61635	GSE61635	blood	129
GEO	human--GEO--GSE53232	GSE53232	blood	128
GEO	human--GEO--GSE18885	GSE18885	blood	127
GEO	human--GEO--GSE3365	GSE3365	blood	127
GEO	human--GEO--GSE72420	GSE72420	blood	127
GEO	human--GEO--GSE21545-carotidplaque	GSE21545	blood	125
GEO	human--GEO--GSE24427	GSE24427	blood	125
GEO	human--GEO--GSE23025	GSE23025	blood	124
GEO	human--GEO--GSE64176	GSE64176	blood	124
GEO	human--GEO--GSE95233	GSE95233	blood	124
GEO	human--GEO--GSE45536	GSE45536	blood	123
GEO	human--GEO--GSE57083-hematopoieticsystem	GSE57083	blood	123
GEO	human--GEO--GSE8650	GSE8650	blood	123
GEO	human--GEO--GSE47727	GSE47727	blood	122
GEO	human--GEO--GSE33566	GSE33566	blood	121
GEO	human--GEO--GSE43151	GSE43151	blood	121
GEO	human--GEO--GSE63098	GSE63098	blood	121
GEO	human--GEO--GSE13849	GSE13849	blood	120
GEO	human--GEO--GSE34788	GSE34788	blood	120
GEO	human--GEO--GSE45484	GSE45484	blood	120
GEO	human--GEO--GSE55276	GSE55276	blood	120
GEO	human--GEO--GSE55277	GSE55277	blood	120
GEO	human--GEO--GSE58133	GSE58133	blood	120
GEO	human--GEO--GSE59743	GSE59743	blood	120
GEO	human--GEO--GSE73089	GSE73089	blood	120
GEO	human--GEO--GSE87072	GSE87072	blood	120
GEO	human--GEO--GSE112087	GSE112087	blood	120
GEO	human--GEO--GSE4170	GSE4170	blood	119
GEO	human--GEO--GSE86627	GSE86627	blood	119
GEO	human--GEO--GSE87186	GSE87186	blood	119
GEO	human--GEO--GSE24759-umbilicalcordblood	GSE24759	blood	118
GEO	human--GEO--GSE27237	GSE27237	blood	118
GEO	human--GEO--GSE34714	GSE34714	blood	117
GEO	human--GEO--GSE46681-macrophages	GSE46681	blood	117
GEO	human--GEO--GSE77791	GSE77791	blood	117
GEO	human--GEO--GSE9006	GSE9006	blood	117
GEO	human--GEO--GSE53515	GSE53515	blood	116
GEO	human--GEO--GSE38958	GSE38958	blood	115
GEO	human--GEO--GSE102459-blood	GSE102459	blood	114
GEO	human--GEO--GSE35725	GSE35725	blood	114
GEO	human--GEO--GSE41767	GSE41767	blood	114
GEO	human--GEO--GSE70044	GSE70044	blood	114
GEO	human--GEO--GSE16837	GSE16837	blood	113
GEO	human--GEO--GSE17156	GSE17156	blood	113
GEO	human--GEO--GSE24495	GSE24495	blood	113
GEO	human--GEO--GSE53166	GSE53166	blood	113
GEO	human--GEO--GSE53471	GSE53471	blood	113
GEO	human--GEO--GSE103927	GSE103927	blood	112
GEO	human--GEO--GSE17459	GSE17459	blood	112
GEO	human--GEO--GSE28654	GSE28654	blood	112
GEO	human--GEO--GSE53922	GSE53922	blood	112
GEO	human--GEO--GSE56396	GSE56396	blood	112
GEO	human--GEO--GSE57405	GSE57405	blood	111
GEO	human--GEO--GSE11909	GSE11909	blood	110
GEO	human--GEO--GSE16028	GSE16028	blood	109
GEO	human--GEO--GSE23304	GSE23304	blood	109
GEO	human--GEO--GSE25571	GSE25571	blood	109
GEO	human--GEO--GSE73408	GSE73408	blood	109
GEO	human--GEO--GSE3846	GSE3846	blood	108
GEO	human--GEO--GSE22762	GSE22762	blood	107
GEO	human--GEO--GSE48368	GSE48368	blood	107
GEO	human--GEO--GSE51254	GSE51254	blood	107
GEO	human--GEO--GSE57065	GSE57065	blood	107
GEO	human--GEO--GSE58411	GSE58411	blood	107
GEO	human--GEO--GSE70461	GSE70461	blood	107
GEO	human--GEO--GSE87629	GSE87629	blood	107
GEO	human--GEO--GSE55962	GSE55962	blood	106
GEO	human--GEO--GSE58137	GSE58137	blood	106
GEO	human--GEO--GSE40888	GSE40888	blood	105
GEO	human--GEO--GSE40889	GSE40889	blood	105
GEO	human--GEO--GSE6613	GSE6613	blood	105
GEO	human--GEO--GSE74224	GSE74224	blood	105
GEO	human--GEO--GSE100927	GSE100927	blood	104
GEO	human--GEO--GSE21521	GSE21521	blood	104
GEO	human--GEO--GSE54644	GSE54644	blood	104
GEO	human--GEO--GSE87801	GSE87801	blood	104
GEO	human--GEO--GSE26378	GSE26378	blood	103
GEO	human--GEO--GSE37567	GSE37567	blood	102
GEO	human--GEO--GSE42826	GSE42826	blood	102
GEO	human--GEO--GSE85531	GSE85531	blood	102
GEO	human--GEO--GSE34205	GSE34205	blood	101
GEO	human--GEO--GSE78193	GSE78193	blood	101
GEO	human--GEO--GSE79970	GSE79970	blood	101
GEO	human--GEO--GSE93658	GSE93658	blood	101
GEO	human--GEO--GSE43553	GSE43553	blood	100
GEO	human--GEO--GSE49896	GSE49896	blood	100
GEO	human--GEO--GSE63952	GSE63952	blood	100
GEO	human--GEO--GSE70536	GSE70536	blood	100
GEO	human--GEO--GSE18123	GSE18123	blood	99
GEO	human--GEO--GSE66360	GSE66360	blood	99
GEO	human--GEO--GSE7440	GSE7440	blood	99
GEO	human--GEO--GSE7757	GSE7757	blood	99
GEO	human--GEO--GSE28460	GSE28460	blood	98
GEO	human--GEO--GSE33321-lcl	GSE33321	blood	98
GEO	human--GEO--GSE62646	GSE62646	blood	98
GEO	human--GEO--GSE72058	GSE72058	blood	98
GEO	human--GEO--GSE21311	GSE21311	blood	97
GEO	human--GEO--GSE34198	GSE34198	blood	97
GEO	human--GEO--GSE63085	GSE63085	blood	97
GEO	human--GEO--GSE68720	GSE68720	blood	97
GEO	human--GEO--GSE10220	GSE10220	blood	96
GEO	human--GEO--GSE12375	GSE12375	blood	96
GEO	human--GEO--GSE21545-pbmc	GSE21545	blood	96
GEO	human--GEO--GSE26210	GSE26210	blood	96
GEO	human--GEO--GSE28985	GSE28985	blood	96
GEO	human--GEO--GSE40719	GSE40719	blood	96
GEO	human--GEO--GSE43497-blood	GSE43497	blood	96
GEO	human--GEO--GSE48624	GSE48624	blood	96
GEO	human--GEO--GSE63878	GSE63878	blood	96
GEO	human--GEO--GSE86884	GSE86884	blood	96
GEO	human--GEO--GSE23515	GSE23515	blood	95
GEO	human--GEO--GSE23746	GSE23746	blood	95
GEO	human--GEO--GSE32862	GSE32862	blood	95
GEO	human--GEO--GSE42830	GSE42830	blood	95
GEO	human--GEO--GSE28042	GSE28042	blood	94
GEO	human--GEO--GSE33321-wholeblood	GSE33321	blood	94
GEO	human--GEO--GSE43497-pbmc	GSE43497	blood	94
GEO	human--GEO--GSE76293	GSE76293	blood	94
GEO	human--GEO--GSE85243	GSE85243	blood	94
GEO	human--GEO--GSE94138	GSE94138	blood	94
GEO	human--GEO--GSE24759-peripheralblood	GSE24759	blood	93
GEO	human--GEO--GSE25837	GSE25837	blood	93
GEO	human--GEO--GSE30375	GSE30375	blood	93
GEO	human--GEO--GSE30377	GSE30377	blood	93
GEO	human--GEO--GSE69049	GSE69049	blood	93
GEO	human--GEO--GSE10609	GSE10609	blood	92
GEO	human--GEO--GSE42026	GSE42026	blood	92
GEO	human--GEO--GSE55288	GSE55288	blood	92
GEO	human--GEO--GSE56609	GSE56609	blood	92
GEO	human--GEO--GSE58294	GSE58294	blood	92
GEO	human--GEO--GSE76349	GSE76349	blood	92
GEO	human--GEO--GSE92652	GSE92652	blood	91
GEO	human--GEO--GSE39316	GSE39316	blood	90
GEO	human--GEO--GSE44729	GSE44729	blood	90
GEO	human--GEO--GSE52245	GSE52245	blood	90
GEO	human--GEO--GSE70311	GSE70311	blood	90
GEO	human--GEO--GSE8507	GSE8507	blood	90
GEO	human--GEO--GSE19078	GSE19078	blood	89
GEO	human--GEO--GSE24891	GSE24891	blood	89
GEO	human--GEO--GSE3492	GSE3492	blood	89
GEO	human--GEO--GSE648	GSE648	blood	89
GEO	human--GEO--GSE15158	GSE15158	blood	88
GEO	human--GEO--GSE16059	GSE16059	blood	88
GEO	human--GEO--GSE46449	GSE46449	blood	88
GEO	human--GEO--GSE51739	GSE51739	blood	88
GEO	human--GEO--GSE56744	GSE56744	blood	88
GEO	human--GEO--GSE2296	GSE2296	blood	87
GEO	human--GEO--GSE74027	GSE74027	blood	87
GEO	human--GEO--GSE8723	GSE8723	blood	87
GEO	human--GEO--GSE33580	GSE33580	blood	86
GEO	human--GEO--GSE50011	GSE50011	blood	86
GEO	human--GEO--GSE61754	GSE61754	blood	86
GEO	human--GEO--GSE108215	GSE108215	blood	85
GEO	human--GEO--GSE26554	GSE26554	blood	84
GEO	human--GEO--GSE92532	GSE92532	blood	83
GEO	human--GEO--GSE62190	GSE62190	blood	82
GEO	human--GEO--GSE83482	GSE83482	blood	82
GEO	human--GEO--GSE108297-pbmc	GSE108297	blood	81
GEO	human--GEO--GSE74752	GSE74752	blood	81
GEO	human--GEO--GSE108297-whole_blood	GSE108297	blood	80
GEO	human--GEO--GSE75011	GSE75011	blood	80
GEO	human--GEO--GSE46681-pbmc	GSE46681	blood	78
GEO	human--GEO--GSE78840-peripheral_blood	GSE78840	blood	77
GEO	human--GEO--GSE11877-blood	GSE11877	blood	76
GEO	human--GEO--GSE68735-blood	GSE68735	blood	76
GEO	human--GEO--GSE34577	GSE34577	blood	66
GEO	human--GEO--GSE27272-maternalperipheralblood	GSE27272	blood	65
GEO	human--GEO--GSE27272-cordblood	GSE27272	blood	64
GEO	human--GEO--GSE44721-monocytes	GSE44721	blood	64
GEO	human--GEO--GSE44721-dendriticcells	GSE44721	blood	64
GEO	human--GEO--GSE74246	GSE74246	blood	63
GEO	human--GEO--GSE50084-biopsy	GSE50084	blood	61
GEO	human--GEO--GSE26841-blood	GSE26841	blood	60
GEO	human--GEO--GSE41840-blood	GSE41840	blood	60
GEO	human--GEO--GSE34823-peripheralblood	GSE34823	blood	56
GEO	human--GEO--GSE51082-peripheralblood	GSE51082	blood	55
GEO	human--GEO--GSE27272-placenta	GSE27272	blood	54
GEO	human--GEO--GSE50084-blood	GSE50084	blood	54
GEO	human--GEO--GSE102459-pbmc	GSE102459	blood	50
GEO	human--GEO--GSE107397	GSE107397	blood	50
GEO	human--GEO--GSE36828-cordblood	GSE36828	blood	48
GEO	human--GEO--GSE36828-placenta	GSE36828	blood	48
GEO	human--GEO--GSE40752-pbmc	GSE40752	blood	45
GEO	human--GEO--GSE40231-Atherosclerotic_aortic_wall	GSE40231	blood	40
GEO	human--GEO--GSE67936	GSE67936	blood	33
GEO	human--GEO--GSE27976	GSE27976	bone	249
GEO	human--GEO--GSE21725	GSE21725	bone	242
GEO	human--GEO--GSE21410	GSE21410	bone	231
GEO	human--GEO--GSE21726	GSE21726	bone	203
GEO	human--GEO--GSE8919	GSE8919	bone	191
GEO	human--GEO--GSE15678	GSE15678	bone	187
GEO	human--GEO--GSE34620	GSE34620	bone	117
GEO	human--GEO--GSE50988	GSE50988	bone	91
GEO	human--GEO--GSE13159-bonemarrow	GSE13159	bonemarrow	1556
GEO	human--GEO--GSE15061	GSE15061	bonemarrow	870
GEO	human--GEO--GSE24080	GSE24080	bonemarrow	559
GEO	human--GEO--GSE2658	GSE2658	bonemarrow	559
GEO	human--GEO--GSE4204	GSE4204	bonemarrow	538
GEO	human--GEO--GSE6891	GSE6891	bonemarrow	537
GEO	human--GEO--GSE14468	GSE14468	bonemarrow	526
GEO	human--GEO--GSE19784	GSE19784	bonemarrow	328
GEO	human--GEO--GSE26760	GSE26760	bonemarrow	304
GEO	human--GEO--GSE17855	GSE17855	bonemarrow	237
GEO	human--GEO--GSE15434	GSE15434	bonemarrow	231
GEO	human--GEO--GSE19429	GSE19429	bonemarrow	200
GEO	human--GEO--GSE13425	GSE13425	bonemarrow	190
GEO	human--GEO--GSE58831	GSE58831	bonemarrow	176
GEO	human--GEO--GSE10255	GSE10255	bonemarrow	161
GEO	human--GEO--GSE13591	GSE13591	bonemarrow	158
GEO	human--GEO--GSE22845	GSE22845	bonemarrow	154
GEO	human--GEO--GSE34823-bonemarrow	GSE34823	bonemarrow	150
GEO	human--GEO--GSE68891	GSE68891	bonemarrow	144
GEO	human--GEO--GSE14062	GSE14062	bonemarrow	140
GEO	human--GEO--GSE100752	GSE100752	bonemarrow	136
GEO	human--GEO--GSE11877-bonemarrow	GSE11877	bonemarrow	131
GEO	human--GEO--GSE68735-bonemarrow	GSE68735	bonemarrow	131
GEO	human--GEO--GSE26713	GSE26713	bonemarrow	124
GEO	human--GEO--GSE30029	GSE30029	bonemarrow	121
GEO	human--GEO--GSE68871	GSE68871	bonemarrow	118
GEO	human--GEO--GSE3912	GSE3912	bonemarrow	112
GEO	human--GEO--GSE89565	GSE89565	bonemarrow	112
GEO	human--GEO--GSE14471	GSE14471	bonemarrow	111
GEO	human--GEO--GSE66004	GSE66004	bonemarrow	109
GEO	human--GEO--GSE66005	GSE66005	bonemarrow	109
GEO	human--GEO--GSE68466	GSE68466	bonemarrow	109
GEO	human--GEO--GSE43176	GSE43176	bonemarrow	108
GEO	human--GEO--GSE13351	GSE13351	bonemarrow	107
GEO	human--GEO--GSE16015	GSE16015	bonemarrow	107
GEO	human--GEO--GSE12662	GSE12662	bonemarrow	106
GEO	human--GEO--GSE71014	GSE71014	bonemarrow	104
GEO	human--GEO--GSE17703	GSE17703	bonemarrow	101
GEO	human--GEO--GSE1427	GSE1427	bonemarrow	99
GEO	human--GEO--GSE47552	GSE47552	bonemarrow	99
GEO	human--GEO--GSE22056	GSE22056	bonemarrow	98
GEO	human--GEO--GSE66002	GSE66002	bonemarrow	98
GEO	human--GEO--GSE66006	GSE66006	bonemarrow	98
GEO	human--GEO--GSE21261	GSE21261	bonemarrow	96
GEO	human--GEO--GSE47051-bonemarrow	GSE47051	bonemarrow	84
GEO	human--GEO--GSE51082-bonemarrow	GSE51082	bonemarrow	83
GEO	human--GEO--GSE33000	GSE33000	brain	624
GEO	human--GEO--GSE68848	GSE68848	brain	580
GEO	human--GEO--GSE36192-cerebellum	GSE36192	brain	456
GEO	human--GEO--GSE36192-frontal_cortex	GSE36192	brain	455
GEO	human--GEO--GSE71620	GSE71620	brain	420
GEO	human--GEO--GSE46743	GSE46743	brain	320
GEO	human--GEO--GSE67835	GSE67835	brain	318
GEO	human--GEO--GSE37382	GSE37382	brain	281
GEO	human--GEO--GSE48865	GSE48865	brain	274
GEO	human--GEO--GSE30272	GSE30272	brain	269
GEO	human--GEO--GSE44770	GSE44770	brain	230
GEO	human--GEO--GSE44771	GSE44771	brain	230
GEO	human--GEO--GSE81934	GSE81934	brain	228
GEO	human--GEO--GSE93321	GSE93321	brain	215
GEO	human--GEO--GSE3790	GSE3790	brain	201
GEO	human--GEO--GSE4290	GSE4290	brain	180
GEO	human--GEO--GSE35977	GSE35977	brain	161
GEO	human--GEO--GSE35978-parietalcortex	GSE35978	brain	161
GTEx	human--GTEx--Pituitary	Pituitary	brain	157
GTEx	human--GTEx--Brain_Cerebellum	Brain_Cerebellum	brain	154
GEO	human--GEO--GSE89399	GSE89399	brain	146
GTEx	human--GTEx--Brain_Caudate_basal_ganglia	Brain_Caudate_basal_ganglia	brain	144
GEO	human--GEO--GSE35974	GSE35974	brain	144
GEO	human--GEO--GSE35978-cerebellum	GSE35978	brain	144
GEO	human--GEO--GSE54004	GSE54004	brain	144
GEO	human--GEO--GSE61374	GSE61374	brain	137
GTEx	human--GTEx--Brain_Cortex	Brain_Cortex	brain	136
GEO	human--GEO--GSE60190	GSE60190	brain	133
GTEx	human--GTEx--Brain_Nucleus_accumbens_basal_ganglia	Brain_Nucleus_accumbens_basal_ganglia	brain	130
GEO	human--GEO--GSE50161	GSE50161	brain	130
GEO	human--GEO--GSE58401	GSE58401	brain	130
GEO	human--GEO--GSE60862-cerebellar_cortex	GSE60862	brain	130
GEO	human--GEO--GSE60862-white_matter	GSE60862	brain	130
GEO	human--GEO--GSE63808	GSE63808	brain	129
GEO	human--GEO--GSE60862-occipital_cortex	GSE60862	brain	128
GEO	human--GEO--GSE92538	GSE92538	brain	128
GEO	human--GEO--GSE95837	GSE95837	brain	127
GEO	human--GEO--GSE60862-frontal_cortex	GSE60862	brain	126
GTEx	human--GTEx--Brain_Cerebellar_Hemisphere	Brain_Cerebellar_Hemisphere	brain	125
GEO	human--GEO--GSE60862-thalamus	GSE60862	brain	123
GEO	human--GEO--GSE84263	GSE84263	brain	121
GEO	human--GEO--GSE52009	GSE52009	brain	120
GEO	human--GEO--GSE60862-medulla	GSE60862	brain	119
GTEx	human--GTEx--Brain_Frontal_Cortex_BA9	Brain_Frontal_Cortex_BA9	brain	118
GEO	human--GEO--GSE60862-temporal_cortex	GSE60862	brain	118
GEO	human--GEO--GSE60862-putamen	GSE60862	brain	117
GEO	human--GEO--GSE95587	GSE95587	brain	117
GEO	human--GEO--GSE59630	GSE59630	brain	116
GEO	human--GEO--GSE58037	GSE58037	brain	114
GEO	human--GEO--GSE60862-hippocampus	GSE60862	brain	112
GTEx	human--GTEx--Brain_Hippocampus	Brain_Hippocampus	brain	111
GTEx	human--GTEx--Brain_Putamen_basal_ganglia	Brain_Putamen_basal_ganglia	brain	111
GEO	human--GEO--GSE86574	GSE86574	brain	110
GTEx	human--GTEx--Brain_Anterior_cingulate_cortex_BA24	Brain_Anterior_cingulate_cortex_BA24	brain	109
GTEx	human--GTEx--Brain_Hypothalamus	Brain_Hypothalamus	brain	108
GEO	human--GEO--GSE58399	GSE58399	brain	105
GEO	human--GEO--GSE12649	GSE12649	brain	102
GEO	human--GEO--GSE4536	GSE4536	brain	101
GEO	human--GEO--GSE37205	GSE37205	brain	100
GEO	human--GEO--GSE4271	GSE4271	brain	100
GEO	human--GEO--GSE80655-AnCg	GSE80655	brain	96
GEO	human--GEO--GSE80655-DLPFC	GSE80655	brain	94
GEO	human--GEO--GSE20295	GSE20295	brain	93
GEO	human--GEO--GSE23806	GSE23806	brain	92
GEO	human--GEO--GSE59612	GSE59612	brain	91
GEO	human--GEO--GSE80655-nAcc	GSE80655	brain	91
GEO	human--GEO--GSE25219-medialprefrontalcortex	GSE25219	brain	90
GEO	human--GEO--GSE60862-substantia_nigra	GSE60862	brain	90
GTEx	human--GTEx--Brain_Amygdala	Brain_Amygdala	brain	88
GEO	human--GEO--GSE25219-dorsolateralprefrontalcortex	GSE25219	brain	88
GEO	human--GEO--GSE62191	GSE62191	brain	88
GEO	human--GEO--GSE62064	GSE62064	brain	87
GEO	human--GEO--GSE25219-posteriorsuperiortemporalcortex	GSE25219	brain	86
GEO	human--GEO--GSE25219-inferiorparietalcortex	GSE25219	brain	85
GEO	human--GEO--GSE25219-ventrolateralprefrontalcortex	GSE25219	brain	85
GEO	human--GEO--GSE25219-primaryvisualcortex	GSE25219	brain	83
GEO	human--GEO--GSE25219-primaryauditorycortex	GSE25219	brain	83
GEO	human--GEO--GSE25219-orbitalprefrontalcortex	GSE25219	brain	82
GEO	human--GEO--GSE25219-hippocampus	GSE25219	brain	82
GEO	human--GEO--GSE78936	GSE78936	brain	82
GTEx	human--GTEx--Brain_Substantia_nigra	Brain_Substantia_nigra	brain	80
GEO	human--GEO--GSE25219-inferiortemporalcortex	GSE25219	brain	78
GEO	human--GEO--GSE25219-amygdala	GSE25219	brain	75
GEO	human--GEO--GSE25219-striatum	GSE25219	brain	75
GEO	human--GEO--GSE25219-mediodorsalnucleusofthalamus	GSE25219	brain	73
GEO	human--GEO--GSE25219-primarysomatosensorycortex	GSE25219	brain	72
GEO	human--GEO--GSE25219-primarymotorcortex	GSE25219	brain	72
GEO	human--GEO--GSE25219-cerebellarcortex	GSE25219	brain	71
GEO	human--GEO--GSE48350-superiorfrontalgyrus	GSE48350	brain	69
GEO	human--GEO--GSE53987-striatum	GSE53987	brain	69
GEO	human--GEO--GSE48350-postcentralgyrus	GSE48350	brain	68
GEO	human--GEO--GSE53987-prefrontalcortex	GSE53987	brain	68
GEO	human--GEO--GSE53987-hippocampus	GSE53987	brain	68
GEO	human--GEO--GSE48350-hippocampus	GSE48350	brain	62
GEO	human--GEO--GSE48350-entorhinalcortex	GSE48350	brain	54
GEO	human--GEO--GSE68950-brain	GSE68950	brain	54
GEO	human--GEO--GSE84422-Nucleus_Accumbens	GSE84422	brain	51
GEO	human--GEO--GSE84422-Amygdala	GSE84422	brain	51
GEO	human--GEO--GSE11882-superior_frontal_gyrus	GSE11882	brain	48
GEO	human--GEO--GSE11882-hippocampus	GSE11882	brain	43
GEO	human--GEO--GSE11882-postcentral_gyrus	GSE11882	brain	43
GEO	human--GEO--GSE11882-entorhinal_cortex	GSE11882	brain	39
GEO	human--GEO--GSE93601	GSE93601	breast	1110
GEO	human--GEO--GSE102484	GSE102484	breast	683
GEO	human--GEO--GSE48091	GSE48091	breast	623
GEO	human--GEO--GSE16446	GSE16446	breast	540
GEO	human--GEO--GSE54002	GSE54002	breast	433
GEO	human--GEO--GSE78958	GSE78958	breast	424
GEO	human--GEO--GSE80999	GSE80999	breast	381
GEO	human--GEO--GSE86166	GSE86166	breast	366
GEO	human--GEO--GSE69845	GSE69845	breast	360
GEO	human--GEO--GSE31448	GSE31448	breast	357
GEO	human--GEO--GSE2109-breast	GSE2109	breast	352
GEO	human--GEO--GSE50705	GSE50705	breast	351
GEO	human--GEO--GSE30682	GSE30682	breast	343
GEO	human--GEO--GSE45725	GSE45725	breast	338
GEO	human--GEO--GSE54329	GSE54329	breast	335
GEO	human--GEO--GSE54331	GSE54331	breast	335
GEO	human--GEO--GSE20685	GSE20685	breast	327
GEO	human--GEO--GSE58644	GSE58644	breast	321
GEO	human--GEO--GSE2845	GSE2845	breast	311
GEO	human--GEO--GSE25055	GSE25055	breast	310
GEO	human--GEO--GSE17705	GSE17705	breast	298
GEO	human--GEO--GSE70951	GSE70951	breast	296
GEO	human--GEO--GSE2034	GSE2034	breast	286
GEO	human--GEO--GSE41998	GSE41998	breast	279
GEO	human--GEO--GSE20194	GSE20194	breast	277
GEO	human--GEO--GSE58212	GSE58212	breast	277
GEO	human--GEO--GSE87455	GSE87455	breast	275
GEO	human--GEO--GSE21653	GSE21653	breast	265
GEO	human--GEO--GSE49481	GSE49481	breast	253
GEO	human--GEO--GSE76275	GSE76275	breast	252
GTEx	human--GTEx--Breast_Mammary_Tissue	Breast_Mammary_Tissue	breast	251
GEO	human--GEO--GSE3494	GSE3494	breast	251
GEO	human--GEO--GSE47109	GSE47109	breast	246
GEO	human--GEO--GSE50811	GSE50811	breast	241
GEO	human--GEO--GSE54275	GSE54275	breast	233
GEO	human--GEO--GSE26639	GSE26639	breast	226
GEO	human--GEO--GSE4611	GSE4611	breast	218
GEO	human--GEO--GSE87411	GSE87411	breast	217
GEO	human--GEO--GSE12276	GSE12276	breast	204
GEO	human--GEO--GSE65095	GSE65095	breast	203
GEO	human--GEO--GSE11121	GSE11121	breast	200
GEO	human--GEO--GSE25065	GSE25065	breast	198
GEO	human--GEO--GSE7390	GSE7390	breast	198
GEO	human--GEO--GSE76250	GSE76250	breast	198
GEO	human--GEO--GSE5364-breast	GSE5364	breast	196
GEO	human--GEO--GSE6128	GSE6128	breast	190
GEO	human--GEO--GSE2990	GSE2990	breast	189
GEO	human--GEO--GSE76124	GSE76124	breast	188
GEO	human--GEO--GSE4056	GSE4056	breast	187
GEO	human--GEO--GSE10780	GSE10780	breast	185
GEO	human--GEO--GSE24450	GSE24450	breast	183
GEO	human--GEO--GSE20271	GSE20271	breast	178
GEO	human--GEO--GSE34138	GSE34138	breast	178
GEO	human--GEO--GSE65194	GSE65194	breast	178
GEO	human--GEO--GSE40115	GSE40115	breast	177
GEO	human--GEO--GSE20181	GSE20181	breast	176
GEO	human--GEO--GSE59590	GSE59590	breast	175
GEO	human--GEO--GSE58135	GSE58135	breast	168
GEO	human--GEO--GSE53031	GSE53031	breast	167
GEO	human--GEO--GSE48408	GSE48408	breast	164
GEO	human--GEO--GSE16987	GSE16987	breast	161
GEO	human--GEO--GSE46581	GSE46581	breast	161
GEO	human--GEO--GSE46604	GSE46604	breast	161
GEO	human--GEO--GSE6861	GSE6861	breast	161
GEO	human--GEO--GSE1456	GSE1456	breast	159
GEO	human--GEO--GSE22358	GSE22358	breast	158
GEO	human--GEO--GSE50948	GSE50948	breast	156
GEO	human--GEO--GSE27562	GSE27562	breast	155
GEO	human--GEO--GSE27830	GSE27830	breast	155
GEO	human--GEO--GSE45827	GSE45827	breast	155
GEO	human--GEO--GSE41313	GSE41313	breast	153
GEO	human--GEO--GSE82172	GSE82172	breast	152
GEO	human--GEO--GSE68744	GSE68744	breast	148
GEO	human--GEO--GSE18672	GSE18672	breast	143
GEO	human--GEO--GSE37210	GSE37210	breast	143
GEO	human--GEO--GSE43973	GSE43973	breast	142
GEO	human--GEO--GSE63471	GSE63471	breast	142
GEO	human--GEO--GSE9309	GSE9309	breast	142
GEO	human--GEO--GSE70905	GSE70905	breast	137
GEO	human--GEO--GSE12093	GSE12093	breast	136
GEO	human--GEO--GSE45255	GSE45255	breast	133
GEO	human--GEO--GSE4823	GSE4823	breast	132
GEO	human--GEO--GSE22226	GSE22226	breast	129
GEO	human--GEO--GSE5460	GSE5460	breast	129
GEO	human--GEO--GSE71258	GSE71258	breast	128
GEO	human--GEO--GSE79586	GSE79586	breast	128
GEO	human--GEO--GSE48927	GSE48927	breast	125
GEO	human--GEO--GSE35186	GSE35186	breast	124
GEO	human--GEO--GSE73237	GSE73237	breast	124
GEO	human--GEO--GSE37181	GSE37181	breast	123
GEO	human--GEO--GSE2603	GSE2603	breast	121
GEO	human--GEO--GSE42568	GSE42568	breast	121
GEO	human--GEO--GSE49175	GSE49175	breast	120
GEO	human--GEO--GSE56493	GSE56493	breast	120
GEO	human--GEO--GSE106977	GSE106977	breast	119
GEO	human--GEO--GSE29917	GSE29917	breast	118
GEO	human--GEO--GSE93204	GSE93204	breast	118
GEO	human--GEO--GSE9014	GSE9014	breast	117
GEO	human--GEO--GSE23177	GSE23177	breast	116
GEO	human--GEO--GSE5462	GSE5462	breast	116
GEO	human--GEO--GSE19615	GSE19615	breast	115
GEO	human--GEO--GSE26304	GSE26304	breast	115
GEO	human--GEO--GSE32646	GSE32646	breast	115
GEO	human--GEO--GSE102088	GSE102088	breast	114
GEO	human--GEO--GSE69031	GSE69031	breast	114
GEO	human--GEO--GSE26457	GSE26457	breast	113
GEO	human--GEO--GSE10890	GSE10890	breast	112
GEO	human--GEO--GSE73235	GSE73235	breast	112
GEO	human--GEO--GSE97460-bt20	GSE97460	breast	112
GEO	human--GEO--GSE43365	GSE43365	breast	111
GEO	human--GEO--GSE83591	GSE83591	breast	109
GEO	human--GEO--GSE12665	GSE12665	breast	108
GEO	human--GEO--GSE37751	GSE37751	breast	108
GEO	human--GEO--GSE103091	GSE103091	breast	107
GEO	human--GEO--GSE30010	GSE30010	breast	107
GEO	human--GEO--GSE36771	GSE36771	breast	107
GEO	human--GEO--GSE36774	GSE36774	breast	107
GEO	human--GEO--GSE58812	GSE58812	breast	107
GEO	human--GEO--GSE35428	GSE35428	breast	106
GEO	human--GEO--GSE50470	GSE50470	breast	105
GEO	human--GEO--GSE5325	GSE5325	breast	105
GEO	human--GEO--GSE9936	GSE9936	breast	105
GEO	human--GEO--GSE22093	GSE22093	breast	103
GEO	human--GEO--GSE24185	GSE24185	breast	103
GEO	human--GEO--GSE4779	GSE4779	breast	102
GEO	human--GEO--GSE32641	GSE32641	breast	102
GEO	human--GEO--GSE36693	GSE36693	breast	101
GEO	human--GEO--GSE57341-breastcancer	GSE57341	breast	101
GEO	human--GEO--GSE32489	GSE32489	breast	101
GEO	human--GEO--GSE36772	GSE36772	breast	100
GEO	human--GEO--GSE64073	GSE64073	breast	100
GEO	human--GEO--GSE12790	GSE12790	breast	98
GEO	human--GEO--GSE3521	GSE3521	breast	98
GEO	human--GEO--GSE12622	GSE12622	breast	97
GEO	human--GEO--GSE20462	GSE20462	breast	97
GEO	human--GEO--GSE100925	GSE100925	breast	96
GEO	human--GEO--GSE48906	GSE48906	breast	96
GEO	human--GEO--GSE61364	GSE61364	breast	96
GEO	human--GEO--GSE65398	GSE65398	breast	96
GEO	human--GEO--GSE76360	GSE76360	breast	96
GEO	human--GEO--GSE5847	GSE5847	breast	95
GEO	human--GEO--GSE74667	GSE74667	breast	95
GEO	human--GEO--GSE2294	GSE2294	breast	94
GEO	human--GEO--GSE46563	GSE46563	breast	94
GEO	human--GEO--GSE58984	GSE58984	breast	94
GEO	human--GEO--GSE104549	GSE104549	breast	92
GEO	human--GEO--GSE42822	GSE42822	breast	91
GEO	human--GEO--GSE46141	GSE46141	breast	91
GEO	human--GEO--GSE20711	GSE20711	breast	90
GEO	human--GEO--GSE28821	GSE28821	breast	89
GEO	human--GEO--GSE31912	GSE31912	breast	89
GEO	human--GEO--GSE66305	GSE66305	breast	88
GEO	human--GEO--GSE6532	GSE6532	breast	87
GEO	human--GEO--GSE70884	GSE70884	breast	87
GEO	human--GEO--GSE15852	GSE15852	breast	86
GEO	human--GEO--GSE25011	GSE25011	breast	86
GEO	human--GEO--GSE1992	GSE1992	breast	85
GEO	human--GEO--GSE21921	GSE21921	breast	85
GEO	human--GEO--GSE73526	GSE73526	breast	82
GEO	human--GEO--GSE2740	GSE2740	breast	80
GEO	human--GEO--GSE78806-breast	GSE78806	breast	78
GEO	human--GEO--GSE103512-breast	GSE103512	breast	75
GEO	human--GEO--GSE6130	GSE6130	breast	73
GEO	human--GEO--GSE57083-breast	GSE57083	breast	69
GEO	human--GEO--GSE68950-breast	GSE68950	breast	44
GEO	human--GEO--GSE4922	GSE4922	breast	36
GEO	human--GEO--GSE97221	GSE97221	breast	6
GEO	human--GEO--GSE27211	GSE27211	cell line	438
GEO	human--GEO--GSE97460-u87	GSE97460-u87	cell line	373
GEO	human--GEO--GSE51029	GSE51029	cell line	336
GEO	human--GEO--GSE5258	GSE5258	cell line	218
GEO	human--GEO--GSE85871	GSE85871	cell line	212
GEO	human--GEO--GSE10843	GSE10843	cell line	206
GEO	human--GEO--GSE7761	GSE7761	cell line	176
GEO	human--GEO--GSE7792	GSE7792	cell line	176
GEO	human--GEO--GSE7851	GSE7851	cell line	176
GEO	human--GEO--GSE59368	GSE59368	cell line	145
GEO	human--GEO--GSE28904	GSE28904	cell line	120
GEO	human--GEO--GSE41296	GSE41296	cell line	120
GEO	human--GEO--GSE27210	GSE27210	cell line	114
GEO	human--GEO--GSE81067	GSE81067	cell line	110
GEO	human--GEO--GSE67185	GSE67185	cell line	108
GEO	human--GEO--GSE74725	GSE74725	cell line	101
GEO	human--GEO--GSE94302	GSE94302	cell line	99
GEO	human--GEO--GSE79368	GSE79368	cell line	96
GEO	human--GEO--GSE80667	GSE80667	cell line	96
GEO	human--GEO--GSE62673	GSE62673	cell line	94
GEO	human--GEO--GSE48142	GSE48142	cell line	93
GEO	human--GEO--GSE76495	GSE76495	cell line	92
GEO	human--GEO--GSE42069	GSE42069	cell line	90
GEO	human--GEO--GSE29405	GSE29405	cell line	89
GEO	human--GEO--GSE86857	GSE86857	cell line	80
GEO	human--GEO--GSE66053	GSE66053	cell line	79
GEO	human--GEO--GSE99819	GSE99819	cell line	73
GEO	human--GEO--GSE44001	GSE44001	cervix	300
GEO	human--GEO--GSE57025	GSE57025	cervix	191
GEO	human--GEO--GSE36562	GSE36562	cervix	155
GEO	human--GEO--GSE29817	GSE29817	cervix	151
GEO	human--GEO--GSE72723	GSE72723	cervix	148
GEO	human--GEO--GSE63514	GSE63514	cervix	128
GTEx	human--GTEx--Vagina	Vagina	cervix	106
GEO	human--GEO--GSE68182	GSE68182	cervix	105
GEO	human--GEO--GSE39582	GSE39582	colon	582
GEO	human--GEO--GSE76402	GSE76402	colon	529
GEO	human--GEO--GSE41258	GSE41258	colon	378
GEO	human--GEO--GSE87211	GSE87211	colon	351
GEO	human--GEO--GSE68468-colon	GSE68468	colon	301
GEO	human--GEO--GSE14333	GSE14333	colon	290
GEO	human--GEO--GSE2109-colon	GSE2109	colon	289
GEO	human--GEO--GSE65270	GSE65270	colon	273
GTEx	human--GTEx--Colon_Transverse	Colon_Transverse	colon	246
GEO	human--GEO--GSE44076	GSE44076	colon	246
GEO	human--GEO--GSE36701	GSE36701	colon	221
GEO	human--GEO--GSE75315	GSE75315	colon	211
GTEx	human--GTEx--Colon_Sigmoid	Colon_Sigmoid	colon	203
GEO	human--GEO--GSE11223	GSE11223	colon	202
GEO	human--GEO--GSE12032	GSE12032	colon	198
GEO	human--GEO--GSE73255	GSE73255	colon	193
GEO	human--GEO--GSE14095	GSE14095	colon	189
GEO	human--GEO--GSE73661	GSE73661	colon	178
GEO	human--GEO--GSE17536	GSE17536	colon	177
GEO	human--GEO--GSE26682	GSE26682	colon	176
GEO	human--GEO--GSE71571	GSE71571	colon	176
GEO	human--GEO--GSE96528	GSE96528	colon	174
GEO	human--GEO--GSE20881	GSE20881	colon	172
GEO	human--GEO--GSE37182	GSE37182	colon	172
GEO	human--GEO--GSE13294	GSE13294	colon	155
GEO	human--GEO--GSE59857	GSE59857	colon	155
GEO	human--GEO--GSE71222	GSE71222	colon	152
GEO	human--GEO--GSE81980	GSE81980	colon	150
GEO	human--GEO--GSE21510	GSE21510	colon	148
GEO	human--GEO--GSE83889	GSE83889	colon	136
GEO	human--GEO--GSE36335	GSE36335	colon	132
GEO	human--GEO--GSE20842	GSE20842	colon	130
GEO	human--GEO--GSE37892	GSE37892	colon	130
GEO	human--GEO--GSE90627	GSE90627	colon	128
GEO	human--GEO--GSE53091	GSE53091	colon	125
GEO	human--GEO--GSE64256	GSE64256	colon	125
GEO	human--GEO--GSE72970	GSE72970	colon	124
GEO	human--GEO--GSE38832	GSE38832	colon	122
GEO	human--GEO--GSE3629	GSE3629	colon	121
GEO	human--GEO--GSE59071	GSE59071	colon	116
GEO	human--GEO--GSE75214-colon	GSE75214	colon	116
GEO	human--GEO--GSE27854	GSE27854	colon	115
GEO	human--GEO--GSE23597	GSE23597	colon	113
GEO	human--GEO--GSE18105	GSE18105	colon	111
GEO	human--GEO--GSE44861	GSE44861	colon	111
GEO	human--GEO--GSE31279	GSE31279	colon	110
GEO	human--GEO--GSE5206	GSE5206	colon	105
GEO	human--GEO--GSE20970	GSE20970	colon	103
GEO	human--GEO--GSE33193	GSE33193	colon	100
GEO	human--GEO--GSE30378	GSE30378	colon	95
GEO	human--GEO--GSE95791	GSE95791	colon	95
GEO	human--GEO--GSE37364	GSE37364	colon	94
GEO	human--GEO--GSE28709	GSE28709	colon	93
GEO	human--GEO--GSE47756	GSE47756	colon	93
GEO	human--GEO--GSE73360	GSE73360	colon	92
GEO	human--GEO--GSE16879-colon	GSE16879	colon	91
GEO	human--GEO--GSE57083-colon	GSE57083	colon	91
GEO	human--GEO--GSE101792	GSE101792	colon	90
GEO	human--GEO--GSE26906	GSE26906	colon	90
GEO	human--GEO--GSE33113	GSE33113	colon	90
GEO	human--GEO--GSE4459	GSE4459	colon	89
GEO	human--GEO--GSE37175	GSE37175	colon	88
GEO	human--GEO--GSE41657	GSE41657	colon	88
GEO	human--GEO--GSE76987	GSE76987	colon	86
GEO	human--GEO--GSE100833-rectum	GSE100833	colon	78
GEO	human--GEO--GSE57341-coloncancer	GSE57341	colon	78
GEO	human--GEO--GSE103512-colorectal	GSE103512	colon	69
GEO	human--GEO--GSE71187-rectum	GSE71187	colon	60
GEO	human--GEO--GSE48634-rectum	GSE48634	colon	59
GEO	human--GEO--GSE71187-colon	GSE71187	colon	57
GEO	human--GEO--GSE100833-transverse_colon	GSE100833	colon	51
GEO	human--GEO--GSE100833-ascending_colon	GSE100833	colon	48
GEO	human--GEO--GSE48634-descendingcolon	GSE48634	colon	46
GEO	human--GEO--GSE100833-descending_colon	GSE100833	colon	40
GEO	human--GEO--GSE48634-ascendingcolon	GSE48634	colon	36
GEO	human--GEO--GSE100833-sigmoid_colon	GSE100833	colon	30
GEO	human--GEO--GSE58697	GSE58697	connective tissue	121
GEO	human--GEO--GSE98011	GSE98011	dendritic cell	92
GEO	human--GEO--GSE76284	GSE76284	embryo	94
GEO	human--GEO--GSE81252-huvec	GSE81252-huvec	endothelial	74
GEO	human--GEO--GSE80796	GSE80796	epithelium	505
GEO	human--GEO--GSE47963	GSE47963	epithelium	438
GEO	human--GEO--GSE48018	GSE48018	epithelium	431
GEO	human--GEO--GSE77658	GSE77658	epithelium	283
GEO	human--GEO--GSE5272	GSE5272	epithelium	250
GEO	human--GEO--GSE8190	GSE8190	epithelium	250
GEO	human--GEO--GSE11906	GSE11906	epithelium	223
GEO	human--GEO--GSE36221	GSE36221	epithelium	221
GEO	human--GEO--GSE27557	GSE27557	epithelium	192
GEO	human--GEO--GSE71766	GSE71766	epithelium	186
GEO	human--GEO--GSE63127	GSE63127	epithelium	183
GEO	human--GEO--GSE97742	GSE97742	epithelium	166
GEO	human--GEO--GSE19392	GSE19392	epithelium	163
GEO	human--GEO--GSE47960	GSE47960	epithelium	163
GEO	human--GEO--GSE18385	GSE18385	epithelium	161
GEO	human--GEO--GSE11784	GSE11784	epithelium	157
GEO	human--GEO--GSE17905	GSE17905	epithelium	157
GEO	human--GEO--GSE76324	GSE76324	epithelium	151
GEO	human--GEO--GSE43939	GSE43939	epithelium	148
GEO	human--GEO--GSE89809	GSE89809	epithelium	145
GEO	human--GEO--GSE22148	GSE22148	epithelium	143
GEO	human--GEO--GSE47961	GSE47961	epithelium	141
GEO	human--GEO--GSE15208	GSE15208	epithelium	139
GEO	human--GEO--GSE41861	GSE41861	epithelium	138
GEO	human--GEO--GSE86422	GSE86422	epithelium	138
GEO	human--GEO--GSE44282	GSE44282	epithelium	134
GEO	human--GEO--GSE47962	GSE47962	epithelium	134
GEO	human--GEO--GSE20257	GSE20257	epithelium	131
GEO	human--GEO--GSE19407	GSE19407	epithelium	124
GEO	human--GEO--GSE67698	GSE67698	epithelium	122
GEO	human--GEO--GSE4302	GSE4302	epithelium	118
GEO	human--GEO--GSE83215	GSE83215	epithelium	118
GEO	human--GEO--GSE19667	GSE19667	epithelium	116
GEO	human--GEO--GSE41862	GSE41862	epithelium	116
GEO	human--GEO--GSE43696	GSE43696	epithelium	108
GEO	human--GEO--GSE90732	GSE90732	epithelium	108
GEO	human--GEO--GSE36936	GSE36936	epithelium	105
GEO	human--GEO--GSE7895	GSE7895	epithelium	104
GEO	human--GEO--GSE76226	GSE76226	epithelium	99
GEO	human--GEO--GSE109170	GSE109170	epithelium	95
GEO	human--GEO--GSE11348	GSE11348	epithelium	93
GEO	human--GEO--GSE81690	GSE81690	epithelium	91
GEO	human--GEO--GSE10006	GSE10006	epithelium	87
GEO	human--GEO--GSE13933	GSE13933	epithelium	87
GEO	human--GEO--GSE79209	GSE79209	epithelium	82
GEO	human--GEO--GSE64614	GSE64614	epithelium	40
GEO	human--GEO--GSE58331-anteriororbit	GSE58331	eye	102
GEO	human--GEO--GSE58331-lacrimalgland	GSE58331	eye	73
GTEx	human--GTEx--Cells_Transformed_fibroblasts	Cells_Transformed_fibroblasts	fibroblast	300
GEO	human--GEO--GSE21891	GSE21891	fibroblast	129
GEO	human--GEO--GSE17080-fibroblasts	GSE17080	fibroblast	85
GEO	human--GEO--GSE17080-lcls	GSE17080	fibroblast	85
GEO	human--GEO--GSE62772	GSE62772	fibroblast	81
GEO	human--GEO--GSE40752-fibroblast	GSE40752	fibroblast	54
GEO	human--GEO--GSE98894	GSE98894	gastroenteropancreatic	212
GEO	human--GEO--GSE40774	GSE40774	head and neck	134
GEO	human--GEO--GSE59867	GSE59867	heart	436
GEO	human--GEO--GSE20060	GSE20060	heart	385
GEO	human--GEO--GSE57338	GSE57338	heart	313
GTEx	human--GTEx--Heart_Left_Ventricle	Heart_Left_Ventricle	heart	272
GTEx	human--GTEx--Heart_Atrial_Appendage	Heart_Atrial_Appendage	heart	264
GEO	human--GEO--GSE102249	GSE102249	heart	240
GEO	human--GEO--GSE5406	GSE5406	heart	210
GEO	human--GEO--GSE77343	GSE77343	heart	197
GEO	human--GEO--GSE7547	GSE7547	heart	189
GEO	human--GEO--GSE55231	GSE55231	heart	129
GEO	human--GEO--GSE24988	GSE24988	heart	116
GEO	human--GEO--GSE22253	GSE22253	heart	107
GEO	human--GEO--GSE99926	GSE99926	heart	92
GEO	human--GEO--GSE1145	GSE1145	heart	90
GEO	human--GEO--GSE57945	GSE57945	intestine	322
GEO	human--GEO--GSE93624	GSE93624	intestine	245
GEO	human--GEO--GSE83687	GSE83687	intestine	134
GTEx	human--GTEx--Small_Intestine_Terminal_Ileum	Small_Intestine_Terminal_Ileum	intestine	122
GEO	human--GEO--GSE78806-large_intestine	GSE78806	intestine	121
GEO	human--GEO--GSE95437	GSE95437	intestine	94
GEO	human--GEO--GSE100833-terminal_ileum	GSE100833	intestine	80
GEO	human--GEO--GSE75214-ileum	GSE75214	intestine	78
GEO	human--GEO--GSE16879-ileum	GSE16879	intestine	42
GEO	human--GEO--GSE98320	GSE98320	kidney	1208
GEO	human--GEO--GSE43974	GSE43974	kidney	554
GEO	human--GEO--GSE36059	GSE36059	kidney	411
GEO	human--GEO--GSE48581	GSE48581	kidney	306
GEO	human--GEO--GSE21374	GSE21374	kidney	282
GEO	human--GEO--GSE2109-kidney	GSE2109	kidney	280
GEO	human--GEO--GSE76882	GSE76882	kidney	274
GEO	human--GEO--GSE73731	GSE73731	kidney	265
GEO	human--GEO--GSE110169	GSE110169	kidney	243
GEO	human--GEO--GSE31403	GSE31403	kidney	224
GEO	human--GEO--GSE40435	GSE40435	kidney	202
GEO	human--GEO--GSE72925	GSE72925	kidney	168
GEO	human--GEO--GSE17895	GSE17895	kidney	160
GEO	human--GEO--GSE95611	GSE95611	kidney	154
GEO	human--GEO--GSE10320	GSE10320	kidney	144
GEO	human--GEO--GSE53757	GSE53757	kidney	144
GEO	human--GEO--GSE41137	GSE41137	kidney	140
GEO	human--GEO--GSE65615	GSE65615	kidney	138
GEO	human--GEO--GSE46699	GSE46699	kidney	130
GEO	human--GEO--GSE17818	GSE17818	kidney	115
GEO	human--GEO--GSE37171	GSE37171	kidney	115
GEO	human--GEO--GSE50058	GSE50058	kidney	101
GEO	human--GEO--GSE20491	GSE20491	kidney	99
GEO	human--GEO--GSE68127	GSE68127	kidney	99
GEO	human--GEO--GSE47185	GSE47185	kidney	97
GEO	human--GEO--GSE61739	GSE61739	kidney	96
GEO	human--GEO--GSE11166	GSE11166	kidney	95
GEO	human--GEO--GSE15641	GSE15641	kidney	92
GEO	human--GEO--GSE38262	GSE38262	kidney	92
GEO	human--GEO--GSE25902	GSE25902	kidney	85
GEO	human--GEO--GSE32591-tubulointerstitium	GSE32591	kidney	47
GEO	human--GEO--GSE32591-glomeruli	GSE32591	kidney	46
GEO	human--GEO--GSE78806-kidney	GSE78806	kidney	41
GEO	human--GEO--GSE24293	GSE24293	liver	651
GEO	human--GEO--GSE28878	GSE28878	liver	560
GEO	human--GEO--GSE25097	GSE25097	liver	557
GEO	human--GEO--GSE25935	GSE25935	liver	464
GEO	human--GEO--GSE34798	GSE34798	liver	459
GEO	human--GEO--GSE14520	GSE14520	liver	445
GEO	human--GEO--GSE36376	GSE36376	liver	433
GEO	human--GEO--GSE9588	GSE9588	liver	427
GEO	human--GEO--GSE7123	GSE7123	liver	397
GEO	human--GEO--GSE63898	GSE63898	liver	396
GEO	human--GEO--GSE69850	GSE69850	liver	348
GEO	human--GEO--GSE69844	GSE69844	liver	331
GEO	human--GEO--GSE76297	GSE76297	liver	304
GEO	human--GEO--GSE102079	GSE102079	liver	257
GEO	human--GEO--GSE102006	GSE102006	liver	252
GEO	human--GEO--GSE5975	GSE5975	liver	238
GEO	human--GEO--GSE15654	GSE15654	liver	216
GEO	human--GEO--GSE94417	GSE94417	liver	195
GEO	human--GEO--GSE54648	GSE54648	liver	186
GEO	human--GEO--GSE1898	GSE1898	liver	182
GEO	human--GEO--GSE81252-liver_bud	GSE81252-liver_bud	liver	174
GEO	human--GEO--GSE26566	GSE26566	liver	169
GEO	human--GEO--GSE76427	GSE76427	liver	167
GEO	human--GEO--GSE19977	GSE19977	liver	164
GEO	human--GEO--GSE54236	GSE54236	liver	161
GTEx	human--GTEx--Liver	Liver	liver	153
GEO	human--GEO--GSE11342	GSE11342	liver	152
GEO	human--GEO--GSE32504	GSE32504	liver	149
GEO	human--GEO--GSE39791	GSE39791	liver	144
GEO	human--GEO--GSE55092	GSE55092	liver	140
GEO	human--GEO--GSE46444	GSE46444	liver	136
GEO	human--GEO--GSE20017	GSE20017	liver	135
GEO	human--GEO--GSE62743	GSE62743	liver	132
GEO	human--GEO--GSE83148	GSE83148	liver	128
GEO	human--GEO--GSE47969	GSE47969	liver	125
GEO	human--GEO--GSE64041	GSE64041	liver	125
GEO	human--GEO--GSE47197	GSE47197	liver	124
GEO	human--GEO--GSE84044	GSE84044	liver	124
GEO	human--GEO--GSE53399	GSE53399	liver	120
GEO	human--GEO--GSE80058	GSE80058	liver	119
GEO	human--GEO--GSE15331	GSE15331	liver	117
GEO	human--GEO--GSE14323	GSE14323	liver	115
GEO	human--GEO--GSE26625	GSE26625	liver	110
GEO	human--GEO--GSE17183	GSE17183	liver	108
GEO	human--GEO--GSE23991	GSE23991	liver	108
GEO	human--GEO--GSE89377	GSE89377	liver	107
GEO	human--GEO--GSE61276	GSE61276	liver	106
GEO	human--GEO--GSE69715	GSE69715	liver	103
GEO	human--GEO--GSE78737	GSE78737	liver	103
GEO	human--GEO--GSE16757	GSE16757	liver	100
GEO	human--GEO--GSE62043	GSE62043	liver	100
GEO	human--GEO--GSE4024	GSE4024	liver	98
GEO	human--GEO--GSE9539	GSE9539	liver	98
GEO	human--GEO--GSE12443	GSE12443	liver	97
GEO	human--GEO--GSE54254	GSE54254	liver	96
GEO	human--GEO--GSE17856	GSE17856	liver	95
GEO	human--GEO--GSE46960	GSE46960	liver	95
GEO	human--GEO--GSE87630	GSE87630	liver	94
GEO	human--GEO--GSE62232	GSE62232	liver	91
GEO	human--GEO--GSE15765	GSE15765	liver	90
GEO	human--GEO--GSE43619	GSE43619	liver	88
GEO	human--GEO--GSE45267	GSE45267	liver	87
GEO	human--GEO--GSE103580	GSE103580	liver	86
GEO	human--GEO--GSE40231-Liver	GSE40231	liver	66
GEO	human--GEO--GSE53791	GSE53791	liver	64
GEO	human--GEO--GSE28893	GSE28893	liver	60
GEO	human--GEO--GSE68468-liver	GSE68468	liver	60
GEO	human--GEO--GSE2109-liver	GSE2109	liver	45
GEO	human--GEO--GSE23546	GSE23546	lung	1349
GEO	human--GEO--GSE89843	GSE89843	lung	715
GEO	human--GEO--GSE66499	GSE66499	lung	680
GEO	human--GEO--GSE23352	GSE23352	lung	499
GEO	human--GEO--GSE23545	GSE23545	lung	445
GEO	human--GEO--GSE68465	GSE68465	lung	442
GEO	human--GEO--GSE47460	GSE47460	lung	429
GEO	human--GEO--GSE72094	GSE72094	lung	413
GEO	human--GEO--GSE63074	GSE63074	lung	410
GEO	human--GEO--GSE23529	GSE23529	lung	405
GEO	human--GEO--GSE8052	GSE8052	lung	404
GEO	human--GEO--GSE40407	GSE40407	lung	390
GTEx	human--GTEx--Lung	Lung	lung	383
GEO	human--GEO--GSE68896	GSE68896	lung	316
GEO	human--GEO--GSE30219	GSE30219	lung	292
GEO	human--GEO--GSE71181	GSE71181	lung	284
GEO	human--GEO--GSE41271	GSE41271	lung	275
GEO	human--GEO--GSE34151	GSE34151	lung	259
GEO	human--GEO--GSE44077	GSE44077	lung	226
GEO	human--GEO--GSE81089	GSE81089	lung	217
GEO	human--GEO--GSE3593	GSE3593	lung	198
GEO	human--GEO--GSE99015	GSE99015	lung	198
GEO	human--GEO--GSE37745	GSE37745	lung	196
GEO	human--GEO--GSE40791	GSE40791	lung	194
GEO	human--GEO--GSE4115	GSE4115	lung	192
GEO	human--GEO--GSE57148	GSE57148	lung	189
GEO	human--GEO--GSE50081	GSE50081	lung	181
GEO	human--GEO--GSE32665	GSE32665	lung	176
GEO	human--GEO--GSE42127	GSE42127	lung	176
GEO	human--GEO--GSE83864	GSE83864	lung	165
GEO	human--GEO--GSE75037	GSE75037	lung	164
GEO	human--GEO--GSE94601	GSE94601	lung	158
GEO	human--GEO--GSE19188	GSE19188	lung	156
GEO	human--GEO--GSE77803	GSE77803	lung	156
GEO	human--GEO--GSE63142	GSE63142	lung	155
GEO	human--GEO--GSE76925	GSE76925	lung	151
GEO	human--GEO--GSE43580	GSE43580	lung	146
GEO	human--GEO--GSE76262	GSE76262	lung	139
GEO	human--GEO--GSE68950-lung	GSE68950	lung	136
GEO	human--GEO--GSE8894	GSE8894	lung	136
GEO	human--GEO--GSE68793	GSE68793	lung	134
GEO	human--GEO--GSE14814	GSE14814	lung	133
GEO	human--GEO--GSE31552	GSE31552	lung	131
GEO	human--GEO--GSE4573	GSE4573	lung	130
GEO	human--GEO--GSE2109-lung	GSE2109	lung	128
GEO	human--GEO--GSE31852	GSE31852	lung	124
GEO	human--GEO--GSE66863	GSE66863	lung	121
GEO	human--GEO--GSE19804	GSE19804	lung	120
GEO	human--GEO--GSE13213	GSE13213	lung	117
GEO	human--GEO--GSE60644	GSE60644	lung	117
GEO	human--GEO--GSE32863	GSE32863	lung	116
GEO	human--GEO--GSE102349	GSE102349	lung	113
GEO	human--GEO--GSE43767	GSE43767	lung	113
GEO	human--GEO--GSE3141	GSE3141	lung	111
GEO	human--GEO--GSE43458	GSE43458	lung	110
GEO	human--GEO--GSE10072	GSE10072	lung	107
GEO	human--GEO--GSE74777	GSE74777	lung	107
GEO	human--GEO--GSE57083-lung	GSE57083	lung	105
GEO	human--GEO--GSE67940	GSE67940	lung	104
GEO	human--GEO--GSE77087	GSE77087	lung	104
GEO	human--GEO--GSE28571	GSE28571	lung	100
GEO	human--GEO--GSE33532	GSE33532	lung	100
GEO	human--GEO--GSE78806-lung	GSE78806	lung	99
GEO	human--GEO--GSE51024	GSE51024	lung	96
GEO	human--GEO--GSE108492	GSE108492	lung	95
GEO	human--GEO--GSE18842	GSE18842	lung	91
GEO	human--GEO--GSE33072	GSE33072	lung	90
GEO	human--GEO--GSE58661	GSE58661	lung	89
GEO	human--GEO--GSE66294	GSE66294	lung	88
GEO	human--GEO--GSE37827	GSE37827	lung	87
GEO	human--GEO--GSE41374	GSE41374	lung	86
GEO	human--GEO--GSE74986	GSE74986	lung	86
GEO	human--GEO--GSE60052	GSE60052	lung	84
GEO	human--GEO--GSE103512-lung	GSE103512	lung	69
GEO	human--GEO--GSE26835	GSE26835	lymph	1086
GEO	human--GEO--GSE103147-t_cells	GSE103147	lymph	1077
GEO	human--GEO--GSE49531	GSE49531	lymph	869
GEO	human--GEO--GSE60408	GSE60408	lymph	864
GEO	human--GEO--GSE60690	GSE60690	lymph	754
GEO	human--GEO--GSE33315	GSE33315	lymph	575
GEO	human--GEO--GSE31312	GSE31312	lymph	496
GEO	human--GEO--GSE29342	GSE29342	lymph	480
GEO	human--GEO--GSE6536	GSE6536	lymph	480
GEO	human--GEO--GSE12626	GSE12626	lymph	465
GEO	human--GEO--GSE37772	GSE37772	lymph	439
GEO	human--GEO--GSE75220	GSE75220	lymph	359
GEO	human--GEO--GSE37451	GSE37451	lymph	350
GEO	human--GEO--GSE78840-cd4_t_cells	GSE78840	lymph	293
GEO	human--GEO--GSE23120	GSE23120	lymph	287
GEO	human--GEO--GSE36910	GSE36910	lymph	285
GEO	human--GEO--GSE78840-cd8_t_cells	GSE78840	lymph	283
GEO	human--GEO--GSE51068	GSE51068	lymph	282
GEO	human--GEO--GSE65858	GSE65858	lymph	266
GEO	human--GEO--GSE32918	GSE32918	lymph	249
GEO	human--GEO--GSE34721	GSE34721	lymph	227
GEO	human--GEO--GSE19519	GSE19519	lymph	224
GEO	human--GEO--GSE87371	GSE87371	lymph	223
GEO	human--GEO--GSE31048	GSE31048	lymph	221
GEO	human--GEO--GSE4475	GSE4475	lymph	215
GEO	human--GEO--GSE18233	GSE18233	lymph	202
GEO	human--GEO--GSE22324	GSE22324	lymph	200
GEO	human--GEO--GSE79196	GSE79196	lymph	189
GEO	human--GEO--GSE20098	GSE20098	lymph	173
GEO	human--GEO--GSE25543	GSE25543	lymph	170
GEO	human--GEO--GSE38202	GSE38202	lymph	164
GEO	human--GEO--GSE93261	GSE93261	lymph	149
GEO	human--GEO--GSE57611	GSE57611	lymph	148
GEO	human--GEO--GSE58970	GSE58970	lymph	147
GEO	human--GEO--GSE25507	GSE25507	lymph	146
GEO	human--GEO--GSE58942	GSE58942	lymph	145
GEO	human--GEO--GSE41781	GSE41781	lymph	143
GEO	human--GEO--GSE103844	GSE103844	lymph	142
GEO	human--GEO--GSE52005	GSE52005	lymph	140
GEO	human--GEO--GSE17920	GSE17920	lymph	130
GEO	human--GEO--GSE65904-lymphnode	GSE65904	lymph	130
GEO	human--GEO--GSE32018	GSE32018	lymph	127
GEO	human--GEO--GSE13699	GSE13699	lymph	126
GEO	human--GEO--GSE22470	GSE22470	lymph	125
GEO	human--GEO--GSE89252	GSE89252	lymph	125
GEO	human--GEO--GSE93291	GSE93291	lymph	123
GTEx	human--GTEx--Cells_EBV-transformed_lymphocytes	Cells_EBV	lymph	117
GEO	human--GEO--GSE68950-lymphoid	GSE68950	lymph	116
GEO	human--GEO--GSE6978	GSE6978	lymph	114
GEO	human--GEO--GSE30933	GSE30933	lymph	108
GEO	human--GEO--GSE49284	GSE49284	lymph	108
GEO	human--GEO--GSE67255	GSE67255	lymph	108
GEO	human--GEO--GSE10313	GSE10313	lymph	104
GEO	human--GEO--GSE22895	GSE22895	lymph	101
GEO	human--GEO--GSE43081	GSE43081	lymph	97
GEO	human--GEO--GSE23394	GSE23394	lymph	96
GEO	human--GEO--GSE44248	GSE44248	lymph	96
GEO	human--GEO--GSE57802	GSE57802	lymph	96
GEO	human--GEO--GSE30697	GSE30697	lymph	95
GEO	human--GEO--GSE43606	GSE43606	lymph	91
GEO	human--GEO--GSE14908	GSE14908	lymph	90
GEO	human--GEO--GSE473	GSE473	lymph	88
GEO	human--GEO--GSE56315	GSE56315	lymph	88
GEO	human--GEO--GSE64343	GSE64343	lymph	88
GEO	human--GEO--GSE93984	GSE93984	lymph	88
GEO	human--GEO--GSE101102	GSE101102	lymph	87
GEO	human--GEO--GSE42816	GSE42816	lymph	86
GEO	human--GEO--GSE17080-tcells	GSE17080	lymph	85
GEO	human--GEO--GSE19069	GSE19069	lymph	85
GEO	human--GEO--GSE25638	GSE25638	lymph	84
GEO	human--GEO--GSE66166	GSE66166	lymph	33
GTEx	human--GTEx--Muscle_Skeletal	Muscle_Skeletal	muscle	491
GEO	human--GEO--GSE52529	GSE52529	muscle	353
GEO	human--GEO--GSE13070-skeletalmuscle	GSE13070	muscle	280
GEO	human--GEO--GSE95675	GSE95675	muscle	251
GEO	human--GEO--GSE79920	GSE79920	muscle	229
GEO	human--GEO--GSE41726	GSE41726	muscle	134
GEO	human--GEO--GSE3307	GSE3307	muscle	120
GEO	human--GEO--GSE48278	GSE48278	muscle	114
GEO	human--GEO--GSE28422	GSE28422	muscle	110
GEO	human--GEO--GSE48264	GSE48264	muscle	108
GEO	human--GEO--GSE97084	GSE97084	muscle	103
GEO	human--GEO--GSE10760	GSE10760	muscle	98
GEO	human--GEO--GSE81965	GSE81965	muscle	90
GEO	human--GEO--GSE47881	GSE47881	muscle	89
GEO	human--GEO--GSE41168-muscle	GSE41168	muscle	70
GEO	human--GEO--GSE40231-Skeletal_muscle	GSE40231	muscle	66
GEO	human--GEO--GSE86356-tibialis_anterior_muscle	GSE86356-tibialis_anterior_muscle	muscle	58
GEO	human--GEO--GSE79263	GSE79263	myoblast	86
GEO	human--GEO--GSE45547	GSE45547	nerve	649
GEO	human--GEO--GSE49710	GSE49710	nerve	498
GTEx	human--GTEx--Nerve_Tibial	Nerve_Tibial	nerve	361
GEO	human--GEO--GSE63060	GSE63060	nerve	329
GEO	human--GEO--GSE63935	GSE63935	nerve	303
GEO	human--GEO--GSE87610	GSE87610	nerve	286
GEO	human--GEO--GSE77968	GSE77968	nerve	214
GEO	human--GEO--GSE64415	GSE64415	nerve	209
GEO	human--GEO--GSE93987	GSE93987	nerve	208
GEO	human--GEO--GSE44720	GSE44720	nerve	120
GEO	human--GEO--GSE3446	GSE3446	nerve	117
GEO	human--GEO--GSE13732	GSE13732	nerve	113
GEO	human--GEO--GSE72951	GSE72951	nerve	110
GEO	human--GEO--GSE73129	GSE73129	nerve	110
GEO	human--GEO--GSE57595	GSE57595	nerve	105
GEO	human--GEO--GSE73517	GSE73517	nerve	105
GEO	human--GEO--GSE19422	GSE19422	nerve	90
GEO	human--GEO--GSE16476	GSE16476	nerve	88
GEO	human--GEO--GSE89503	GSE89503	nerve	88
GEO	human--GEO--GSE95639	GSE95639	nerve	87
GEO	human--GEO--GSE9169	GSE9169	nerve	86
GEO	human--GEO--GSE99951	GSE99951	neuron	704
GEO	human--GEO--GSE106589	GSE106589	neuron	94
GTEx	human--GTEx--Esophagus_Mucosa	Esophagus_Mucosa	oralsquamouscell	358
GTEx	human--GTEx--Esophagus_Muscularis	Esophagus_Muscularis	oralsquamouscell	335
GEO	human--GEO--GSE69925	GSE69925	oralsquamouscell	274
GEO	human--GEO--GSE30784	GSE30784	oralsquamouscell	229
GTEx	human--GTEx--Esophagus_Gastroesophageal_Junction	Esophagus_Gastroesophageal_Junction	oralsquamouscell	213
GEO	human--GEO--GSE74553	GSE74553	oralsquamouscell	135
GEO	human--GEO--GSE39491	GSE39491	oralsquamouscell	120
GEO	human--GEO--GSE4676	GSE4676	oralsquamouscell	117
GEO	human--GEO--GSE66258	GSE66258	oralsquamouscell	108
GEO	human--GEO--GSE23400	GSE23400	oralsquamouscell	106
GEO	human--GEO--GSE84846	GSE84846	oralsquamouscell	99
GEO	human--GEO--GSE41613	GSE41613	oralsquamouscell	97
GEO	human--GEO--GSE89923	GSE89923	oralsquamouscell	90
GEO	human--GEO--GSE26549	GSE26549	oralsquamouscell	86
GTEx	human--GTEx--Minor_Salivary_Gland	Minor_Salivary_Gland	oralsquamouscell	85
GEO	human--GEO--GSE75140	GSE75140	organoid	728
GEO	human--GEO--GSE74357	GSE74357	ovary	529
GEO	human--GEO--GSE68661	GSE68661	ovary	507
GEO	human--GEO--GSE9891-ovary	GSE9891	ovary	243
GEO	human--GEO--GSE2109-ovary	GSE2109	ovary	204
GEO	human--GEO--GSE26712	GSE26712	ovary	195
GEO	human--GEO--GSE50831	GSE50831	ovary	189
GEO	human--GEO--GSE53963	GSE53963	ovary	174
GEO	human--GEO--GSE51088	GSE51088	ovary	172
GEO	human--GEO--GSE47856	GSE47856	ovary	171
GEO	human--GEO--GSE3149	GSE3149	ovary	153
GTEx	human--GTEx--Ovary	Ovary	ovary	122
GEO	human--GEO--GSE37582	GSE37582	ovary	121
GEO	human--GEO--GSE17260	GSE17260	ovary	110
GEO	human--GEO--GSE26193	GSE26193	ovary	107
GEO	human--GEO--GSE73614	GSE73614	ovary	107
GEO	human--GEO--GSE6008	GSE6008	ovary	103
GEO	human--GEO--GSE49577	GSE49577	ovary	101
GEO	human--GEO--GSE63885	GSE63885	ovary	101
GEO	human--GEO--GSE69207	GSE69207	ovary	100
GEO	human--GEO--GSE43765	GSE43765	ovary	98
GEO	human--GEO--GSE51105	GSE51105	ovary	94
GEO	human--GEO--GSE12172	GSE12172	ovary	90
GEO	human--GEO--GSE25428	GSE25428	ovary	87
GEO	human--GEO--GSE25429	GSE25429	ovary	87
GEO	human--GEO--GSE102073	GSE102073	ovary	84
GEO	human--GEO--GSE78806-ovary	GSE78806	ovary	52
GEO	human--GEO--GSE57341-ovariancancer	GSE57341	ovary	43
GEO	human--GEO--GSE9891-fallopian	GSE9891	ovary	8
GTEx	human--GTEx--Pancreas	Pancreas	pancreas	220
GEO	human--GEO--GSE45757	GSE45757	pancreas	141
GEO	human--GEO--GSE21501	GSE21501	pancreas	132
GEO	human--GEO--GSE62165	GSE62165	pancreas	131
GEO	human--GEO--GSE62452	GSE62452	pancreas	130
GEO	human--GEO--GSE54279	GSE54279	pancreas	128
GEO	human--GEO--GSE8332	GSE8332	pancreas	119
GEO	human--GEO--GSE105083	GSE105083	pancreas	104
GEO	human--GEO--GSE50827	GSE50827	pancreas	103
GEO	human--GEO--GSE76894	GSE76894	pancreas	103
GEO	human--GEO--GSE76895	GSE76895	pancreas	103
GEO	human--GEO--GSE73338	GSE73338	pancreas	97
GEO	human--GEO--GSE78806-pancreas	GSE78806	pancreas	94
GEO	human--GEO--GSE60979	GSE60979	pancreas	93
GEO	human--GEO--GSE36924	GSE36924	pancreas	91
GEO	human--GEO--GSE28735	GSE28735	pancreas	90
GEO	human--GEO--GSE50244	GSE50244	pancreas	89
GEO	human--GEO--GSE50397	GSE50397	pancreas	89
GEO	human--GEO--GSE108072	GSE108072	pancreas	88
GEO	human--GEO--GSE57083-pancreas	GSE57083	pancreas	41
GEO	human--GEO--GSE35574	GSE35574	placenta	94
GEO	human--GEO--GSE85570	GSE85570	prostate	440
GEO	human--GEO--GSE70768	GSE70768	prostate	199
GEO	human--GEO--GSE97284	GSE97284	prostate	188
GEO	human--GEO--GSE97460-lncap	GSE97460	prostate	188
GEO	human--GEO--GSE17951	GSE17951	prostate	154
GEO	human--GEO--GSE8218	GSE8218	prostate	148
GEO	human--GEO--GSE72220	GSE72220	prostate	147
GEO	human--GEO--GSE60329	GSE60329	prostate	136
GTEx	human--GTEx--Prostate	Prostate	prostate	132
GEO	human--GEO--GSE37199	GSE37199	prostate	107
GEO	human--GEO--GSE54460	GSE54460	prostate	106
GEO	human--GEO--GSE6099	GSE6099	prostate	100
GEO	human--GEO--GSE32571	GSE32571	prostate	98
GEO	human--GEO--GSE88808	GSE88808	prostate	98
GEO	human--GEO--GSE109021	GSE109021	prostate	96
GEO	human--GEO--GSE18684	GSE18684	prostate	96
GEO	human--GEO--GSE29079	GSE29079	prostate	95
GEO	human--GEO--GSE66187	GSE66187	prostate	95
GEO	human--GEO--GSE71016	GSE71016	prostate	95
GEO	human--GEO--GSE70769	GSE70769	prostate	94
GEO	human--GEO--GSE85698	GSE85698	prostate	93
GEO	human--GEO--GSE104377	GSE104377	prostate	87
GEO	human--GEO--GSE6956	GSE6956	prostate	87
GEO	human--GEO--GSE2109-prostate	GSE2109	prostate	83
GEO	human--GEO--GSE103512-prostate	GSE103512	prostate	67
GTEx	human--GTEx--Skin_Sun_Exposed_Lower_leg	Skin_Sun_Exposed_Lower_leg	skin	414
GEO	human--GEO--GSE69849	GSE69849	skin	363
GTEx	human--GTEx--Skin_Not_Sun_Exposed_Suprapubic	Skin_Not_Sun_Exposed_Suprapubic	skin	335
GEO	human--GEO--GSE76885	GSE76885	skin	194
GEO	human--GEO--GSE16382	GSE16382	skin	183
GEO	human--GEO--GSE13355	GSE13355	skin	180
GEO	human--GEO--GSE68453	GSE68453	skin	180
GEO	human--GEO--GSE85034	GSE85034	skin	179
GEO	human--GEO--GSE30999	GSE30999	skin	170
GEO	human--GEO--GSE66664	GSE66664	skin	140
GEO	human--GEO--GSE56803	GSE56803	skin	138
GEO	human--GEO--GSE59455	GSE59455	skin	134
GEO	human--GEO--GSE56754	GSE56754	skin	132
GEO	human--GEO--GSE68801	GSE68801	skin	122
GEO	human--GEO--GSE97681	GSE97681	skin	122
GEO	human--GEO--GSE58558	GSE58558	skin	109
GEO	human--GEO--GSE53552	GSE53552	skin	99
GEO	human--GEO--GSE18876	GSE18876	skin	98
GEO	human--GEO--GSE22083	GSE22083	skin	98
GEO	human--GEO--GSE58095	GSE58095	skin	98
GEO	human--GEO--GSE22801	GSE22801	skin	96
GEO	human--GEO--GSE69967	GSE69967	skin	95
GEO	human--GEO--GSE85861	GSE85861	skin	91
GEO	human--GEO--GSE29359	GSE29359	skin	90
GEO	human--GEO--GSE29377	GSE29377	skin	90
GEO	human--GEO--GSE11903	GSE11903	skin	89
GEO	human--GEO--GSE32413	GSE32413	skin	89
GEO	human--GEO--GSE7553	GSE7553	skin	86
GEO	human--GEO--GSE47944	GSE47944	skin	84
GEO	human--GEO--GSE52390	GSE52390	skin	79
GEO	human--GEO--GSE26841-skin	GSE26841	skin	72
GEO	human--GEO--GSE41840-skin	GSE41840	skin	72
GEO	human--GEO--GSE68950-skin	GSE68950	skin	49
GEO	human--GEO--GSE78806-skin	GSE78806	skin	46
GEO	human--GEO--GSE71118	GSE71118	soft tissue	312
GEO	human--GEO--GSE21050	GSE21050	soft tissue	309
GEO	human--GEO--GSE23980	GSE23980	soft tissue	171
GEO	human--GEO--GSE21122	GSE21122	soft tissue	158
GEO	human--GEO--GSE78806-soft_tissue	GSE78806	soft tissue	62
GTEx	human--GTEx--Brain_Spinal_cord_cervical_c-1	Brain_Spinal_cord_cervical_c	spinal cord	83
GTEx	human--GTEx--Spleen	Spleen	spleen	146
GEO	human--GEO--GSE64016	GSE64016	stem cell	459
GEO	human--GEO--GSE81252-ipsc_line_tkda3_4	GSE81252-ipsc_line_tkda3_4	stem cell	415
GEO	human--GEO--GSE79636	GSE79636	stem cell	317
GEO	human--GEO--GSE30652	GSE30652	stem cell	207
GEO	human--GEO--GSE81252-msc	GSE81252-msc	stem cell	102
GEO	human--GEO--GSE100118	GSE100118	stem cell	85
GEO	human--GEO--GSE84437	GSE84437	stomach	433
GEO	human--GEO--GSE26253	GSE26253	stomach	432
GEO	human--GEO--GSE84433	GSE84433	stomach	357
GEO	human--GEO--GSE16134	GSE16134	stomach	310
GEO	human--GEO--GSE62207	GSE62207	stomach	304
GEO	human--GEO--GSE62254	GSE62254	stomach	300
GEO	human--GEO--GSE66229	GSE66229	stomach	300
GEO	human--GEO--GSE29272	GSE29272	stomach	268
GEO	human--GEO--GSE10334	GSE10334	stomach	247
GTEx	human--GTEx--Stomach	Stomach	stomach	237
GEO	human--GEO--GSE26942	GSE26942	stomach	217
GEO	human--GEO--GSE15459	GSE15459	stomach	200
GEO	human--GEO--GSE40292	GSE40292	stomach	199
GEO	human--GEO--GSE14210	GSE14210	stomach	167
GEO	human--GEO--GSE32225	GSE32225	stomach	155
GEO	human--GEO--GSE15081	GSE15081	stomach	141
GEO	human--GEO--GSE54129	GSE54129	stomach	132
GEO	human--GEO--GSE54532	GSE54532	stomach	132
GEO	human--GEO--GSE14208	GSE14208	stomach	123
GEO	human--GEO--GSE89749	GSE89749	stomach	120
GEO	human--GEO--GSE13898	GSE13898	stomach	118
GEO	human--GEO--GSE26901	GSE26901	stomach	109
GEO	human--GEO--GSE26899	GSE26899	stomach	108
GEO	human--GEO--GSE27020	GSE27020	stomach	107
GEO	human--GEO--GSE29998	GSE29998	stomach	99
GEO	human--GEO--GSE64951	GSE64951	stomach	94
GEO	human--GEO--GSE13861	GSE13861	stomach	90
GEO	human--GEO--GSE63089	GSE63089	stomach	90
GEO	human--GEO--GSE2680	GSE2680	stomach	86
GEO	human--GEO--GSE2109-omentum	GSE2109	stomach	69
GEO	human--GEO--GSE9891-peritoneum	GSE9891	stomach	34
GEO	human--GEO--GSE74681	GSE74681	stool	263
GTEx	human--GTEx--Testis	Testis	testis	225
GEO	human--GEO--GSE3218	GSE3218	testis	107
GTEx	human--GTEx--Thyroid	Thyroid	thyroid	399
GEO	human--GEO--GSE35570	GSE35570	thyroid	116
GEO	human--GEO--GSE33630	GSE33630	thyroid	105
GEO	human--GEO--GSE27155	GSE27155	thyroid	99
GEO	human--GEO--GSE60542	GSE60542	thyroid	92
GEO	human--GEO--GSE5364-thyroid	GSE5364	thyroid	51
GEO	human--GEO--GSE34115	GSE34115	tongue	121
GEO	human--GEO--GSE50830	GSE50830	uterine	168
GEO	human--GEO--GSE51981	GSE51981	uterine	146
GEO	human--GEO--GSE2109-uterus	GSE2109	uterine	127
GEO	human--GEO--GSE31836	GSE31836	uterine	110
GEO	human--GEO--GSE17025	GSE17025	uterine	102
GTEx	human--GTEx--Uterus	Uterus	uterine	101
GEO	human--GEO--GSE77688	GSE77688	uterine	88
GEO	human--GEO--GSE2109-endometrium	GSE2109	uterine	73
GEO	human--GEO--GSE48433	GSE48433	xenograft	207
GEO	human--GEO--GSE79989	GSE79989		192
GEO	human--GEO--GSE89872	GSE89872		179
GEO	human--GEO--GSE29598	GSE29598		125

## Sheet: mouse
Source	internal_ID	identifier	tissue	sample size
MPD	mouse--MPD--Attie1_B6xBTBR_adipose	Attie1_B6xBTBR_adipose	adipose	487
GEO	mouse--GEO--GSE64768	GSE64768	adipose	439
GEO	mouse--GEO--GSE25506-adipose	GSE25506	adipose	363
GEO	mouse--GEO--GSE31222	GSE31222	adipose	331
GEO	mouse--GEO--GSE13746	GSE13746	adipose	308
GEO	mouse--GEO--GSE11065	GSE11065	adipose	295
GEO	mouse--GEO--GSE3086	GSE3086	adipose	295
GEO	mouse--GEO--GSE42890	GSE42890	adipose	185
GEO	mouse--GEO--GSE44095-iwat	GSE44095	adipose	120
GEO	mouse--GEO--GSE44095-bat	GSE44095	adipose	119
GEO	mouse--GEO--GSE44095-ewat	GSE44095	adipose	115
GEO	mouse--GEO--GSE44095-rpwat	GSE44095	adipose	114
GEO	mouse--GEO--GSE75573	GSE75573	adipose	112
GEO	mouse--GEO--GSE30534-perirenaladipose	GSE30534	adipose	80
GEO	mouse--GEO--GSE30534-mesentericadipose	GSE30534	adipose	79
GEO	mouse--GEO--GSE30534-subcutaneousadipose	GSE30534	adipose	78
GEO	mouse--GEO--GSE30534-perigonadaladipose	GSE30534	adipose	75
GEO	mouse--GEO--GSE57659-gonadal_adipose_tissue	GSE57659	adipose	62
GEO	mouse--GEO--GSE57659-subcutaneous_adipose_tissue	GSE57659	adipose	61
GEO	mouse--GEO--GSE57659-visceral_adipose_tissue	GSE57659	adipose	56
GEO	mouse--GEO--GSE52403	GSE52403	blood	536
GEO	mouse--GEO--GSE38705	GSE38705	blood	511
GEO	mouse--GEO--GSE2050	GSE2050	blood	422
GEO	mouse--GEO--GSE75210	GSE75210	blood	365
GEO	mouse--GEO--GSE15907	GSE15907	blood	304
GEO	mouse--GEO--GSE60801	GSE60801	blood	208
GEO	mouse--GEO--GSE1014	GSE1014	blood	204
GEO	mouse--GEO--GSE64548	GSE64548	blood	189
GEO	mouse--GEO--GSE35676-macrophages	GSE35676	blood	170
GEO	mouse--GEO--GSE47674	GSE47674	blood	158
GEO	mouse--GEO--GSE85339-blood	GSE85339	blood	147
GEO	mouse--GEO--GSE61191	GSE61191	blood	128
GEO	mouse--GEO--GSE91003	GSE91003	blood	128
GEO	mouse--GEO--GSE89988	GSE89988	blood	118
GEO	mouse--GEO--GSE3333	GSE3333	blood	116
GEO	mouse--GEO--GSE63177	GSE63177	blood	115
GEO	mouse--GEO--GSE32529-whole_blood	GSE32529	blood	112
GEO	mouse--GEO--GSE1863	GSE1863	blood	96
GEO	mouse--GEO--GSE4962	GSE4962	blood	90
GEO	mouse--GEO--GSE4964	GSE4964	blood	88
GEO	mouse--GEO--GSE86424	GSE86424	blood	88
GEO	mouse--GEO--GSE49987-erythroid	GSE49987	blood	87
GEO	mouse--GEO--GSE49987-myeloid	GSE49987	blood	87
GEO	mouse--GEO--GSE60337	GSE60337	blood	82
GEO	mouse--GEO--GSE60336	GSE60336	blood	81
GEO	mouse--GEO--GSE63611	GSE63611	blood	81
GEO	mouse--GEO--GSE82046	GSE82046	blood	80
GEO	mouse--GEO--GSE61106-blood	GSE61106	blood	79
GEO	mouse--GEO--GSE23573	GSE23573	blood	76
GEO	mouse--GEO--GSE8104	GSE8104	blood	73
GEO	mouse--GEO--GSE77102-blood	GSE77102	blood	68
GEO	mouse--GEO--GSE100961	GSE100961	bone	237
GEO	mouse--GEO--GSE8512	GSE8512	bone	207
GEO	mouse--GEO--GSE27483	GSE27483	bone	149
GEO	mouse--GEO--GSE41667	GSE41667	bone	149
GEO	mouse--GEO--GSE47673	GSE47673	bone	132
GEO	mouse--GEO--GSE47540	GSE47540	bone	111
GEO	mouse--GEO--GSE17721	GSE17721	bone	96
GEO	mouse--GEO--GSE87685	GSE87685	bone	92
GEO	mouse--GEO--GSE75211	GSE75211	bone	86
GEO	mouse--GEO--GSE88920	GSE88920	brain	791
GEO	mouse--GEO--GSE16227-brain	GSE16227	brain	404
GEO	mouse--GEO--GSE70249	GSE70249	brain	392
MPD	mouse--MPD--Attie1_B6xBTBR_hypo	Attie1_B6xBTBR_hypo	brain	369
GEO	mouse--GEO--GSE13745	GSE13745	brain	308
GEO	mouse--GEO--GSE60402	GSE60402	brain	302
GEO	mouse--GEO--GSE12798	GSE12798	brain	292
GEO	mouse--GEO--GSE79551	GSE79551	brain	282
GEO	mouse--GEO--GSE37755	GSE37755	brain	275
GEO	mouse--GEO--GSE3087	GSE3087	brain	249
GEO	mouse--GEO--GSE47029	GSE47029	brain	225
GEO	mouse--GEO--GSE48955	GSE48955	brain	216
GEO	mouse--GEO--GSE65774	GSE65774	brain	208
GEO	mouse--GEO--GSE84767	GSE84767	brain	200
GEO	mouse--GEO--GSE7480	GSE7480	brain	191
GEO	mouse--GEO--GSE65770	GSE65770	brain	168
GEO	mouse--GEO--GSE73503	GSE73503	brain	167
GEO	mouse--GEO--GSE73468	GSE73468	brain	166
GEO	mouse--GEO--GSE48954	GSE48954	brain	156
GEO	mouse--GEO--GSE93515	GSE93515	brain	133
GEO	mouse--GEO--GSE74441-frontal_cortex	GSE74441	brain	131
GEO	mouse--GEO--GSE74441-hippocampus	GSE74441	brain	129
GEO	mouse--GEO--GSE1920-Brain	GSE1920	brain	119
GEO	mouse--GEO--GSE59675	GSE59675	brain	116
GEO	mouse--GEO--GSE63174	GSE63174	brain	115
GEO	mouse--GEO--GSE32529-brain_cortex	GSE32529	brain	112
GEO	mouse--GEO--GSE75569	GSE75569	brain	112
GEO	mouse--GEO--GSE7759	GSE7759	brain	112
GEO	mouse--GEO--GSE61716	GSE61716	brain	109
GEO	mouse--GEO--GSE15774	GSE15774	brain	108
GEO	mouse--GEO--GSE26500-hippocampus	GSE26500	brain	100
GEO	mouse--GEO--GSE60312	GSE60312	brain	100
GEO	mouse--GEO--GSE26500-striatum	GSE26500	brain	98
GEO	mouse--GEO--GSE78270	GSE78270	brain	96
GEO	mouse--GEO--GSE78274	GSE78274	brain	96
GEO	mouse--GEO--GSE78272	GSE78272	brain	95
GEO	mouse--GEO--GSE26600	GSE26600	brain	94
GEO	mouse--GEO--GSE36674	GSE36674	brain	89
GEO	mouse--GEO--GSE9444	GSE9444	brain	89
GEO	mouse--GEO--GSE44555-brain	GSE44555	brain	85
GEO	mouse--GEO--GSE73878	GSE73878	brain	80
GEO	mouse--GEO--GSE42789-prefrontal_cortex	GSE42789	brain	79
Other	mouse--OTHER--CFW-hippocampus	CFW	brain	79
GEO	mouse--GEO--GSE30534-hypothalamus	GSE30534	brain	74
GEO	mouse--GEO--GSE10415-Cerebellum	GSE10415	brain	64
GEO	mouse--GEO--GSE98790-cerebellum	GSE98790	brain	64
GEO	mouse--GEO--GSE10415-Hippocampus	GSE10415	brain	63
GEO	mouse--GEO--GSE10415-OlfactoryBulb	GSE10415	brain	63
GEO	mouse--GEO--GSE10415-BasalGanglia	GSE10415	brain	62
GEO	mouse--GEO--GSE10415-CingulateCortex	GSE10415	brain	62
GEO	mouse--GEO--GSE10415-FrontalCortex	GSE10415	brain	62
GEO	mouse--GEO--GSE10415-Amygdala	GSE10415	brain	61
Other	mouse--OTHER--CFW-striatum	CFW	brain	55
Other	mouse--OTHER--CFW-prefrontalcortex	CFW	brain	54
GEO	mouse--GEO--GSE48566	GSE48566	breast	267
GEO	mouse--GEO--GSE54582	GSE54582	breast	214
GEO	mouse--GEO--GSE64522	GSE64522	breast	159
GEO	mouse--GEO--GSE48564	GSE48564	breast	134
GEO	mouse--GEO--GSE48565	GSE48565	breast	133
GEO	mouse--GEO--GSE15904	GSE15904	breast	126
GEO	mouse--GEO--GSE46077	GSE46077	breast	115
GEO	mouse--GEO--GSE27563	GSE27563	breast	93
GEO	mouse--GEO--GSE104397	GSE104397	breast	80
GEO	mouse--GEO--GSE24594	GSE24594	breast	80
GEO	mouse--GEO--GSE83550	GSE83550	colon	194
GEO	mouse--GEO--GSE88919-colon	GSE88919	colon	80
GEO	mouse--GEO--GSE62967	GSE62967	embryo	177
GEO	mouse--GEO--GSE69970	GSE69970	embryo	153
GEO	mouse--GEO--GSE41673	GSE41673	epithelium	173
GEO	mouse--GEO--GSE87259-palate	GSE87259	epithelium	72
GEO	mouse--GEO--GSE29685	GSE29685	eye	132
GEO	mouse--GEO--GSE66569	GSE66569	heart	366
GEO	mouse--GEO--GSE48760	GSE48760	heart	208
GEO	mouse--GEO--GSE38120	GSE38120	heart	188
GEO	mouse--GEO--GSE82294	GSE82294	heart	177
GEO	mouse--GEO--GSE27236	GSE27236	heart	120
GEO	mouse--GEO--GSE75572	GSE75572	heart	112
GEO	mouse--GEO--GSE77263	GSE77263	heart	99
GEO	mouse--GEO--GSE12413	GSE12413	heart	86
GEO	mouse--GEO--GSE60489	GSE60489	heart	81
GEO	mouse--GEO--GSE42323	GSE42323	heart	80
GEO	mouse--GEO--GSE42362-heart	GSE42362	heart	80
GEO	mouse--GEO--GSE27948-heart	GSE27948	heart	75
GEO	mouse--GEO--GSE98790-heart	GSE98790	heart	64
GEO	mouse--GEO--GSE35676-aortic_endothelial_cells	GSE35676	heart	48
GEO	mouse--GEO--GSE59054	GSE59054	intestine	116
GEO	mouse--GEO--GSE6065	GSE6065	intestine	100
GEO	mouse--GEO--GSE76630	GSE76630	intestine	78
GEO	mouse--GEO--GSE87259-jejunum	GSE87259	intestine	72
GEO	mouse--GEO--GSE87259-duodenum	GSE87259	intestine	70
GEO	mouse--GEO--GSE88919-small_intestine	GSE88919	intestine	68
MPD	mouse--MPD--Attie1_B6xBTBR_kidney	Attie1_B6xBTBR_kidney	kidney	474
GEO	mouse--GEO--GSE25506-kidney_cortex	GSE25506	kidney	357
GEO	mouse--GEO--GSE25506-kidney_medulla	GSE25506	kidney	349
GEO	mouse--GEO--GSE23310	GSE23310	kidney	173
MPD	mouse--MPD--Hageman2011_MRLxSM_kidney	Hageman2011_MRLxSM_kidney	kidney	173
GEO	mouse--GEO--GSE96101	GSE96101	kidney	120
GEO	mouse--GEO--GSE1920-Kidney	GSE1920	kidney	119
GEO	mouse--GEO--GSE44555-kidney	GSE44555	kidney	102
GEO	mouse--GEO--GSE50038	GSE50038	kidney	100
GEO	mouse--GEO--GSE86425	GSE86425	kidney	95
GEO	mouse--GEO--GSE72554	GSE72554	kidney	80
GEO	mouse--GEO--GSE27948-kidney	GSE27948	kidney	75
GEO	mouse--GEO--GSE45684	GSE45684	liver	1084
MPD	mouse--MPD--Attie1_B6xBTBR_liver	Attie1_B6xBTBR_liver	liver	483
GEO	mouse--GEO--GSE44783	GSE44783	liver	450
Other	mouse--OTHER--MXIF2-liver	MXIF2	liver	440
GEO	mouse--GEO--GSE30140	GSE30140	liver	435
GEO	mouse--GEO--GSE64769	GSE64769	liver	433
GEO	mouse--GEO--GSE13870	GSE13870	liver	429
GEO	mouse--GEO--GSE16227-liver	GSE16227	liver	397
GEO	mouse--GEO--GSE25506-liver	GSE25506	liver	387
GEO	mouse--GEO--GSE72759	GSE72759	liver	384
GEO	mouse--GEO--GSE536	GSE536	liver	360
GEO	mouse--GEO--GSE83739	GSE83739	liver	354
GEO	mouse--GEO--GSE2814	GSE2814	liver	311
GEO	mouse--GEO--GSE11338	GSE11338	liver	302
GEO	mouse--GEO--GSE13752	GSE13752	liver	302
GEO	mouse--GEO--GSE25322	GSE25322	liver	300
GEO	mouse--GEO--GSE20901	GSE20901	liver	298
GEO	mouse--GEO--GSE20903	GSE20903	liver	298
GEO	mouse--GEO--GSE20902	GSE20902	liver	294
GEO	mouse--GEO--GSE16780	GSE16780	liver	288
GEO	mouse--GEO--GSE99558	GSE99558	liver	262
GEO	mouse--GEO--GSE18858	GSE18858	liver	242
GEO	mouse--GEO--GSE55489	GSE55489	liver	235
GEO	mouse--GEO--GSE66568	GSE66568	liver	220
GEO	mouse--GEO--GSE60684	GSE60684	liver	167
GEO	mouse--GEO--GSE65772	GSE65772	liver	167
GEO	mouse--GEO--GSE22297	GSE22297	liver	157
GEO	mouse--GEO--GSE93591	GSE93591	liver	154
GEO	mouse--GEO--GSE10493	GSE10493	liver	144
GEO	mouse--GEO--GSE16886	GSE16886	liver	142
GEO	mouse--GEO--GSE1897	GSE1897	liver	133
GEO	mouse--GEO--GSE17522	GSE17522	liver	122
GEO	mouse--GEO--GSE15226	GSE15226	liver	120
GEO	mouse--GEO--GSE1920-Liver	GSE1920	liver	120
GEO	mouse--GEO--GSE55084	GSE55084	liver	120
GEO	mouse--GEO--GSE59194	GSE59194	liver	120
GEO	mouse--GEO--GSE65346	GSE65346	liver	120
GEO	mouse--GEO--GSE63175	GSE63175	liver	119
GEO	mouse--GEO--GSE87633-Liver	GSE87633	liver	112
GEO	mouse--GEO--GSE44088	GSE44088	liver	111
GEO	mouse--GEO--GSE48334	GSE48334	liver	111
GEO	mouse--GEO--GSE10280	GSE10280	liver	110
GEO	mouse--GEO--GSE47844	GSE47844	liver	108
GEO	mouse--GEO--GSE2008	GSE2008	liver	107
GEO	mouse--GEO--GSE93903	GSE93903	liver	103
GEO	mouse--GEO--GSE44555-liver	GSE44555	liver	101
GEO	mouse--GEO--GSE43977	GSE43977	liver	97
GEO	mouse--GEO--GSE50789	GSE50789	liver	96
GEO	mouse--GEO--GSE54597	GSE54597	liver	96
GEO	mouse--GEO--GSE48126	GSE48126	liver	95
GEO	mouse--GEO--GSE24278	GSE24278	liver	94
GEO	mouse--GEO--GSE78273	GSE78273	liver	93
GEO	mouse--GEO--GSE68364	GSE68364	liver	91
GEO	mouse--GEO--GSE20052	GSE20052	liver	90
GEO	mouse--GEO--GSE47345	GSE47345	liver	88
GEO	mouse--GEO--GSE83197	GSE83197	liver	88
GEO	mouse--GEO--GSE17609	GSE17609	liver	87
GEO	mouse--GEO--GSE89658	GSE89658	liver	86
GEO	mouse--GEO--GSE73552	GSE73552	liver	84
GEO	mouse--GEO--GSE4640	GSE4640	liver	82
GEO	mouse--GEO--GSE60149	GSE60149	liver	81
GEO	mouse--GEO--GSE30534-liver	GSE30534	liver	80
GEO	mouse--GEO--GSE42789-liver	GSE42789	liver	80
GEO	mouse--GEO--GSE84590	GSE84590	liver	80
GEO	mouse--GEO--GSE27948-liver	GSE27948	liver	75
GEO	mouse--GEO--GSE3330	GSE3330	liver	60
GEO	mouse--GEO--GSE77102-liver	GSE77102	liver	52
GEO	mouse--GEO--GSE19493	GSE19493	lung	280
GEO	mouse--GEO--GSE81570	GSE81570	lung	233
GEO	mouse--GEO--GSE63786	GSE63786	lung	209
GEO	mouse--GEO--GSE17933	GSE17933	lung	191
GEO	mouse--GEO--GSE42641	GSE42641	lung	180
GEO	mouse--GEO--GSE41684	GSE41684	lung	167
GEO	mouse--GEO--GSE29042	GSE29042	lung	160
GEO	mouse--GEO--GSE98470	GSE98470	lung	154
GEO	mouse--GEO--GSE71232	GSE71232	lung	143
GEO	mouse--GEO--GSE55286	GSE55286	lung	139
GEO	mouse--GEO--GSE42638	GSE42638	lung	138
GEO	mouse--GEO--GSE51768	GSE51768	lung	138
GEO	mouse--GEO--GSE51321-lung	GSE51321	lung	131
GEO	mouse--GEO--GSE41665	GSE41665	lung	123
GEO	mouse--GEO--GSE87633-Lung	GSE87633	lung	122
GEO	mouse--GEO--GSE59404	GSE59404	lung	112
GEO	mouse--GEO--GSE40151	GSE40151	lung	111
GEO	mouse--GEO--GSE18344	GSE18344	lung	110
GEO	mouse--GEO--GSE87292	GSE87292	lung	109
GEO	mouse--GEO--GSE20959	GSE20959	lung	108
GEO	mouse--GEO--GSE2565	GSE2565	lung	104
GEO	mouse--GEO--GSE64800	GSE64800	lung	104
GEO	mouse--GEO--GSE87298	GSE87298	lung	102
GEO	mouse--GEO--GSE44555-lung	GSE44555	lung	98
GEO	mouse--GEO--GSE11005	GSE11005	lung	95
GEO	mouse--GEO--GSE36969	GSE36969	lung	94
GEO	mouse--GEO--GSE33266	GSE33266	lung	92
GEO	mouse--GEO--GSE88825	GSE88825	lung	91
GEO	mouse--GEO--GSE75156	GSE75156	lung	90
GEO	mouse--GEO--GSE24061	GSE24061	lung	88
GEO	mouse--GEO--GSE50000	GSE50000	lung	86
GEO	mouse--GEO--GSE39304	GSE39304	lung	84
GEO	mouse--GEO--GSE15869	GSE15869	lung	81
GEO	mouse--GEO--GSE59396	GSE59396	lung	80
GEO	mouse--GEO--GSE42362-lung	GSE42362	lung	78
GEO	mouse--GEO--GSE99192	GSE99192	lung	67
GEO	mouse--GEO--GSE61106-lung	GSE61106	lung	39
GEO	mouse--GEO--GSE85339-lymph_node	GSE85339	lymph	146
MPD	mouse--MPD--Attie1_B6xBTBR_gastroc	Attie1_B6xBTBR_gastroc	muscle	490
GEO	mouse--GEO--GSE16227-muscle	GSE16227	muscle	413
GEO	mouse--GEO--GSE3088	GSE3088	muscle	319
GEO	mouse--GEO--GSE12795	GSE12795	muscle	285
GEO	mouse--GEO--GSE64908	GSE64908	muscle	112
GEO	mouse--GEO--GSE75571	GSE75571	muscle	112
GEO	mouse--GEO--GSE25908	GSE25908	muscle	111
GEO	mouse--GEO--GSE63176	GSE63176	muscle	106
GEO	mouse--GEO--GSE43373	GSE43373	muscle	105
GEO	mouse--GEO--GSE84522	GSE84522	muscle	104
GEO	mouse--GEO--GSE75869	GSE75869	muscle	83
GEO	mouse--GEO--GSE27948-skeletal_muscle	GSE27948	muscle	75
GEO	mouse--GEO--GSE98790-dorsal_root_ganglion	GSE98790	nerve	64
GEO	mouse--GEO--GSE27396	GSE27396	ovary	120
GEO	mouse--GEO--GSE27715	GSE27715	ovary	90
MPD	mouse--MPD--Attie1_B6xBTBR_islet	Attie1_B6xBTBR_islet	pancreas	491
GEO	mouse--GEO--GSE78183	GSE78183	pancreas	318
GEO	mouse--GEO--GSE36379-alpha_tc1	GSE36379	pancreas	299
GEO	mouse--GEO--GSE36379-beta_tc3	GSE36379	pancreas	295
GEO	mouse--GEO--GSE53202	GSE53202	prostate	384
GEO	mouse--GEO--GSE94574	GSE94574	prostate	92
GEO	mouse--GEO--GSE63044	GSE63044	skin	252
GEO	mouse--GEO--GSE52639	GSE52639	skin	153
GEO	mouse--GEO--GSE95421	GSE95421	skin	130
GEO	mouse--GEO--GSE60769	GSE60769	skin	105
GEO	mouse--GEO--GSE52524-back	GSE52524	skin	99
GEO	mouse--GEO--GSE52524-tail	GSE52524	skin	97
GEO	mouse--GEO--GSE11629	GSE11629	skin	88
GEO	mouse--GEO--GSE97618	GSE97618	skin	82
GEO	mouse--GEO--GSE5296	GSE5296	spinal cord	96
GEO	mouse--GEO--GSE61901	GSE61901	spleen	214
GEO	mouse--GEO--GSE87633-Spleen	GSE87633	spleen	90
GEO	mouse--GEO--GSE77102-spleen	GSE77102	spleen	72
GEO	mouse--GEO--GSE61106-spleen	GSE61106	spleen	52
GEO	mouse--GEO--GSE31374	GSE31374	stem cell	308
GEO	mouse--GEO--GSE26520	GSE26520	stem cell	246
GEO	mouse--GEO--GSE14559	GSE14559	stem cell	216
GEO	mouse--GEO--GSE53969	GSE53969	stem cell	192
GEO	mouse--GEO--GSE16148	GSE16148	stem cell	124
GEO	mouse--GEO--GSE19836	GSE19836	stem cell	114
GEO	mouse--GEO--GSE84521	GSE84521	stem cell	102
GEO	mouse--GEO--GSE72350	GSE72350	stem cell	98
GEO	mouse--GEO--GSE36313	GSE36313	stem cell	84
GEO	mouse--GEO--GSE46227	GSE46227	stem cell	80
GEO	mouse--GEO--GSE51321-forestomach	GSE51321	stomach	130
GEO	mouse--GEO--GSE54089	GSE54089	testis	331

## Sheet: rat
Source	internal_ID	identifier	tissue	sample size
GEO	rat--GEO--GSE13268	GSE13268	adipose	101
GEO	rat--GEO--GSE27023	GSE27023	blood	96
GEO	rat--GEO--GSE5594	GSE5594	blood	144
GEO	rat--GEO--GSE20980	GSE20980	bone	93
GEO	rat--GEO--GSE71306	GSE71306	bone	294
GEO	rat--GEO--GSE31705	GSE31705	brain	97
GEO	rat--GEO--GSE31708	GSE31708	brain	96
GEO	rat--GEO--GSE4031	GSE4031	brain	105
GEO	rat--GEO--GSE47752	GSE47752	brain	172
GEO	rat--GEO--GSE56666	GSE56666	brain	119
GEO	rat--GEO--GSE63561	GSE63561	brain	192
GEO	rat--GEO--GSE88874	GSE88874	brain	160
GEO	rat--GEO--GSE7002	GSE7002	epithelium	98
GEO	rat--GEO--GSE5680	GSE5680	eye	120
GEO	rat--GEO--GSE19290	GSE19290	heart	82
GEO	rat--GEO--GSE57800	GSE57800	heart	862
GEO	rat--GEO--GSE16233	GSE16233	kidney	89
GEO	rat--GEO--GSE19366	GSE19366	kidney	120
GEO	rat--GEO--GSE57811	GSE57811	kidney	1410
GEO	rat--GEO--GSE5923	GSE5923	kidney	84
GEO	rat--GEO--GSE13270	GSE13270	liver	101
GEO	rat--GEO--GSE19628	GSE19628	liver	199
GEO	rat--GEO--GSE19662	GSE19662	liver	531
GEO	rat--GEO--GSE2216	GSE2216	liver	176
GEO	rat--GEO--GSE24363	GSE24363	liver	418
GEO	rat--GEO--GSE32891	GSE32891	liver	96
GEO	rat--GEO--GSE40348	GSE40348	liver	300
GEO	rat--GEO--GSE45892	GSE45892	liver	720
GEO	rat--GEO--GSE47875	GSE47875	liver	105
GEO	rat--GEO--GSE49473	GSE49473	liver	115
GEO	rat--GEO--GSE55347	GSE55347	liver	116
GEO	rat--GEO--GSE5595	GSE5595	liver	144
GEO	rat--GEO--GSE57805	GSE57805	liver	939
GEO	rat--GEO--GSE57815	GSE57815	liver	2218
GEO	rat--GEO--GSE59495	GSE59495	liver	90
GEO	rat--GEO--GSE68110	GSE68110	liver	421
GEO	rat--GEO--GSE70585	GSE70585	liver	100
GEO	rat--GEO--GSE72506	GSE72506	liver	191
GEO	rat--GEO--GSE1888	GSE1888	lung	154
GEO	rat--GEO--GSE13269	GSE13269	muscle	101
GEO	rat--GEO--GSE5100	GSE5100	muscle	484
GEO	rat--GEO--GSE57816	GSE57816	muscle	158
GEO	rat--GEO--GSE29488	GSE29488	spinal cord	164
GEO	rat--GEO--GSE31695	GSE31695	spinal cord	91
GEO	rat--GEO--GSE69334	GSE69334	spinal cord	164
GEO	rat--GEO--GSE32869	GSE32869	stomach	90

## Sheet: fly
Source	internal_ID	identifier	tissue	sample size
GEO	fly--GEO--GSE101882	GSE101882		216
GEO	fly--GEO--GSE11316	GSE11316		86
GEO	fly--GEO--GSE11695	GSE11695		150
GEO	fly--GEO--GSE17013	GSE17013		120
GEO	fly--GEO--GSE31386	GSE31386		134
GEO	fly--GEO--GSE33779	GSE33779		90
GEO	fly--GEO--GSE38106-Abdomen	GSE38106	Abdomen	60
GEO	fly--GEO--GSE38106-Head	GSE38106	Head	60
GEO	fly--GEO--GSE50745	GSE50745		235
GEO	fly--GEO--GSE5181	GSE5181		288
GEO	fly--GEO--GSE52076	GSE52076		596
GEO	fly--GEO--GSE8843	GSE8843		80
Other	fly--OTHER--DGRP-female			368
Other	fly--OTHER--DGRP-male			369

## Sheet: worm
Source	internal_ID	identifier	tissue	sample size
GEO	worm--GEO--GSE12290	GSE12290		104
GEO	worm--GEO--GSE17071	GSE17071		54
GEO	worm--GEO--GSE2180	GSE2180		123
GEO	worm--GEO--GSE23857	GSE23857		208
GEO	worm--GEO--GSE3169	GSE3169		67
GEO	worm--GEO--GSE34650	GSE34650		90
GEO	worm--GEO--GSE41366	GSE41366		146
GEO	worm--GEO--GSE42592	GSE42592		80
GEO	worm--GEO--GSE5395	GSE5395		80
GEO	worm--GEO--GSE77905	GSE77905		78

## Sheet: yeast
Source	internal_ID	identifier	tissue	sample size
GEO	yeast--GEO--GSE11452	GSE11452		170
GEO	yeast--GEO--GSE11633	GSE11633		93
GEO	yeast--GEO--GSE12270	GSE12270		85
GEO	yeast--GEO--GSE19116	GSE19116		132
GEO	yeast--GEO--GSE1990	GSE1990		254
GEO	yeast--GEO--GSE25582	GSE25582		151
GEO	yeast--GEO--GSE25644	GSE25644		464
GEO	yeast--GEO--GSE25909	GSE25909		319
GEO	yeast--GEO--GSE26169	GSE26169		210
GEO	yeast--GEO--GSE28919	GSE28919		412
GEO	yeast--GEO--GSE29059	GSE29059		127
GEO	yeast--GEO--GSE3021	GSE3021		91
GEO	yeast--GEO--GSE3076	GSE3076		96
GEO	yeast--GEO--GSE33097	GSE33097		295
GEO	yeast--GEO--GSE34787	GSE34787		96
GEO	yeast--GEO--GSE3705	GSE3705		227
GEO	yeast--GEO--GSE3706	GSE3706		227
GEO	yeast--GEO--GSE3729	GSE3729		129
GEO	yeast--GEO--GSE37	GSE37		80
GEO	yeast--GEO--GSE42215	GSE42215		200
GEO	yeast--GEO--GSE42217	GSE42217		200
GEO	yeast--GEO--GSE42526	GSE42526		1246
GEO	yeast--GEO--GSE42527	GSE42527		1387
GEO	yeast--GEO--GSE42536	GSE42536		287
GEO	yeast--GEO--GSE45115	GSE45115		755
GEO	yeast--GEO--GSE4654	GSE4654		269
GEO	yeast--GEO--GSE54196	GSE54196		196
GEO	yeast--GEO--GSE5499	GSE5499		265
GEO	yeast--GEO--GSE617	GSE617		178
GEO	yeast--GEO--GSE7385	GSE7385		87
GEO	yeast--GEO--GSE7419	GSE7419		243
GEO	yeast--GEO--GSE8560	GSE8560		176
GEO	yeast--GEO--GSE8561	GSE8561		181
GEO	yeast--GEO--GSE9108	GSE9108		109
GEO	yeast--GEO--GSE9376	GSE9376		220
GEO	yeast--GEO--GSE9466	GSE9466		84
