# Supplementary material for: Identifying gene function and module connections by the integration of multispecies expression compendia
Source: HighWire-hosted journal article supplement (doi:10.1101/gr.251983.119), 2019-11-21
Supplement: Supplemental_Table_S2.xlsx [file Supplemental_Table_S2.xlsx]

## Sheet: Sheet1
Supplemental Table S2. Top 10 most frequent terms of the module clusters in Fig. 1B.
Module clusters No	Top 10 most frequent terms
1	ion, transport, transmembrane, transporter, calcium, channel, potassium, cation, homeostasis, acid
2	ion, ATPase, transport, transmembrane, biosynthetic, coupled, homeostasis, transporter, ATP, metal
3	vesicle, membrane, transport, antigen, synaptic, Golgi, presentation, endocytosis, exocytosis, processing
4	protein, transmembrane, peroxisomal, peroxisome, microbody, transporter, membrane, transport, import, intracellular
5	transport, transmembrane, acid, release, cycle, neurotransmitter, anion, chloride, fatty, inorganic
6	binding, region, DNA, sequence−specific, polymerase, II, RNA, regulatory, transcription, promoter
7	lipoprotein, transport, particle, lipid, plasma, cholesterol, clearance, remodeling, assembly, complex
8	cell, migration, angiogenesis, endothelial, blood, development, sprouting, vessel, epithelial, morphogenesis
9	cell, projection, neuron, development, morphogenesis, assembly, differentiation, bounded, membrane, organization
10	response, oxidative, cellular, stress, cell, death, hydrogen, ion, oxygen, reactive
11	metabolic, biosynthetic, cholesterol, lipid, alcohol, steroid, biosynthesis, phosphatidylinositol, inositol, metabolism
12	muscle, cell, development, cardiac, growth, tissue, differentiation, morphogenesis, striated, proliferation
13	transport, microtubule, complex, along, dynein, motor, vesicle, intraciliary, ATP−dependent, binding
14	organization, actin, assembly, polymerization, microtubule, protein, filament, depolymerization, cytoskeleton, complex
15	membrane, mitochondrial, protein, localization, apoptotic, pathway, permeability, insertion, mitochondria, signaling
16	mRNA, catabolic, decay, nuclear−transcribed, binds, complex, deadenylation−dependent, destabilizes, exoribonuclease
17	mitotic, chromosome, segregation, chromatid, nuclear, sister, cell, cycle, division, checkpoint
18	protein, secretion, transport, localization, nucleus, import, hormone, interleukin−1, mitochondrion, mRNA
19	acid, metabolic, biosynthetic, catabolic, fatty, metabolism, lipid, amino, oxygen, cellular
20	sulfate, metabolic, biosynthetic, glycosaminoglycan, proteoglycan, chondroitin, biosynthesis, metabolism, keratan, catabolic
21	metabolic, biosynthetic, metabolism, acyl, acyl−chain, chain, phosphatidylinositol, remodeling, remodelling, acid
22	development, morphogenesis, kidney, epithelium, nephron, branching, cell, differentiation, tubule, renal
23	apoptotic, pathway, signaling, DNA, intrinsic, damage, response, class, mediator, p53
24	glycosylation, metabolic, biosynthetic, biosynthesis, protein, sphingolipid, causes, defective, glycosphingolipid, GPI
25	development, morphogenesis, embryonic, tube, formation, specification, eye, differentiation, neural, organ
26	metabolic, nucleotide, biosynthetic, purine, transport, complex, respiratory, nuclear, chain, cyclic
27	metabolic, biosynthetic, carbohydrate, cellular, glycogen, polysaccharide, catabolic, glucan, diseases, gluconeogenesis
28	histone, acetylation, methylation, tRNA, modification, protein, acetyltransferase, methyltransferase, complex, organization
29	binding, purine, nucleotide, ribonucleotide, nucleoside, phosphatidylinositol, ribonucleoside, adenyl, guanyl, phosphate
30	production, interferon, I, signaling, type, response, activation, pathway, dsRNA, gene
31	collagen, extracellular, metabolic, interactions, matrix, multicellular, met, organismal, organization, biosynthetic
32	complex, mRNA, subunit, viral, ribosomal, translation, mitochondrial, splicing, catabolic, protein
33	signaling, Notch1, domain, Notch, mutants, membrane, pathway, protein, proteolysis, cancer
34	gene, DNA, silencing, expression, assembly, chromatin, nucleosome, complex, protein, RNA
35	telomere, maintenance, localization, telomerase, chromosome, DNA, RNA, biosynthetic, body, cajal
36	DNA, repair, replication, synthesis, strand, complex, nucleotide−excision, translesion, damage, break
37	signaling, pathway, receptor, cascade, activation, response, complex, toll, mediated, TAK1
38	signaling, cell, degradation, pathway, protein, response, Wnt, mediated, mitotic, cellular
39	signal, transduction, GTPase, protein, signalling, Rho, Ras, mediated, small, binding
40	response, receptor, signaling, pathway, cellular, stimulus, hormone, factor, growth, protein
41	RNA, polymerase, transcription, complex, elongation, II, promoter, HIV, III, kinase
42	signaling, cancer, pathway, receptor, FGFR1, FGFR2, growth, factor, kinase, ERBB2
43	signaling, factor, binding, exchange, GTPase, Rab, response, cytokine, guanyl−nucleotide, cellular
44	response, endoplasmic, protein, reticulum, unfolded, pathway, stress, ERAD, activates, apoptotic
45	membrane, phototransduction, detection, metabolic, stimulus, cell, cilium, light, photoreceptor, cascade
46	response, pathway, immune, signaling, receptor, cell, activation, complement, defense, B
47	protein, catabolic, endopeptidase, cysteine−type, cellular, apoptotic, inhibitor, peptidase, proteolysis, regulator
48	cell, cycle, mitotic, transition, checkpoint, phase, DNA, damage, signal, transduction
49	immune, response, mediated, cell, production, immunity, immunoglobulin, somatic, host, cytotoxicity
50	cell, T, differentiation, activation, proliferation, leukocyte, alpha−beta, lymphocyte, adhesion, immune
51	junction, assembly, adhesion, cell, adherens, cell−substrate, organization, cell−cell, cell−matrix, focal
52	granule, membrane, activation, lumen, leukocyte, neutrophil, vesicle, immune, response, secretory
53	platelet, coagulation, response, activation, hemostasis, blood, healing, wound, wounding, adhesion
54	metabolic, catabolic, compound, nucleoside, nucleotide, purine, pyrimidine, biosynthetic, phosphate, deoxyribonucleotide
55	signalling, activation, receptors, signaling, events, folding, pathway, G, protein
56	development, reproduction, reproductive, differentiation, male, maturation, sexual, characteristics, female, gonad
57	kinase, cascade, protein, phosphorylation, MAPK, STAT, stress−activated, serinethreonine, ERK1, ERK2
58	chemotaxis, migration, cell, leukocyte, neutrophil, receptor, lymphocyte, chemokine, granulocyte, response
59	dephosphorylation, phosphatase, protein, phosphoprotein, ester, hydrolase, acting, bonds, peptidyl−tyrosine, phosphoric
60	metabolic, metabolism, biosynthetic, biosynthesis, cobalamin, compound, glucuronate, glucuronidation, heme, pigment
61	receptor, channel, activation, acetylcholine, glutamate, ion, ligand−gated, neurotransmitter, postsynaptic, binding
62	muscle, cardiac, cell, potential, contraction, membrane, action, repolarization, channel, conduction
rest	binding, cell, protein, signaling, response, receptor, membrane, complex, development, pathway
