# Supplementary material for: Identifying gene function and module connections by the integration of multispecies expression compendia
Source: HighWire-hosted journal article supplement (doi:10.1101/gr.251983.119), 2019-11-21
Supplement: Supplemental_Table_S3.xlsx [file Supplemental_Table_S3.xlsx]

## Sheet: human_gene_1962_EHHADH_kidney_v
Supplemental Table S3. Tissue-specific association of EHHADH in kidney and liver tissues in humans.
Modules			G-MAD results
Module ID	Module name	Module Source	All tissues	Kidney	Liver	Difference (kidney vs liver)	Gene present in the module
R-HSA-211935	Fatty acids	Reactome	0.082	0	0.648272	-0.648272	No
GO:0008395	steroid hydroxylase activity	GOMF	0.086	0	0.564277	-0.564277	No
GO:0006699	bile acid biosynthetic process	GOBP	0.094	0.108501	0.669801	-0.5613	No
KEGG_00120	Primary bile acid biosynthesis	KEGG	0.142	0.21826	0.777202	-0.558943	No
GO:0034361	very-low-density lipoprotein particle	GOCC	0.145	0	0.544139	-0.544139	No
GO:0034385	triglyceride-rich plasma lipoprotein particle	GOCC	0.145	0	0.544139	-0.544139	No
R-HSA-8963898	Plasma lipoprotein assembly	Reactome	0.079	0	0.528396	-0.528396	No
GO:0017144	drug metabolic process	GOBP	0.129	0.137252	0.664866	-0.527614	No
R-HSA-193807	Synthesis of bile acids and bile salts via 27-hydroxycholesterol	Reactome	0.058	0	0.523744	-0.523744	No
KEGG_00140	Steroid hormone biosynthesis	KEGG	0.118	0.228534	0.733009	-0.504475	No
R-HSA-192105	Synthesis of bile acids and bile salts	Reactome	0.11	0.204742	0.698636	-0.493894	No
GO:0032994	protein-lipid complex	GOCC	0.129	0.105574	0.598111	-0.492537	No
GO:0006067	ethanol metabolic process	GOBP	0.139	0.212476	0.699581	-0.487104	No
GO:0034358	plasma lipoprotein particle	GOCC	0.138	0.106131	0.584776	-0.478646	No
GO:1990777	lipoprotein particle	GOCC	0.138	0.106131	0.584776	-0.478646	No
GO:0015721	bile acid and bile salt transport	GOBP	0.101	0.0959248	0.573388	-0.477463	No
GO:0072376	protein activation cascade	GOBP	0.138	0.112987	0.584565	-0.471578	No
R-HSA-977606	Regulation of Complement cascade	Reactome	0.122	0.0963211	0.562718	-0.466397	No
GO:0034364	high-density lipoprotein particle	GOCC	0.124	0.102678	0.563608	-0.460931	No
GO:0055090	acylglycerol homeostasis	GOBP	0.083	0	0.454458	-0.454458	No
GO:0070328	triglyceride homeostasis	GOBP	0.083	0	0.454458	-0.454458	No
R-HSA-211981	Xenobiotics	Reactome	0.112	0.108223	0.557854	-0.449631	No
GO:0006956	complement activation	GOBP	0.118	0.104802	0.550929	-0.446127	No
GO:0030449	regulation of complement activation	GOBP	0.113	0.0970217	0.534017	-0.436996	No
GO:2000257	regulation of protein activation cascade	GOBP	0.113	0.0970217	0.534017	-0.436996	No
R-HSA-166658	Complement cascade	Reactome	0.136	0.145193	0.580732	-0.435539	No
GO:0072562	blood microparticle	GOCC	0.154	0.192672	0.626157	-0.433485	No
GO:0019373	epoxygenase P450 pathway	GOBP	0.13	0.247338	0.670347	-0.423009	No
GO:0016655	oxidoreductase activity, acting on NAD(P)H, quinone or similar compound as acceptor	GOMF	0.076	0.0676812	0.490303	-0.422622	No
GO:0052695	cellular glucuronidation	GOBP	0.18	0.285211	0.701639	-0.416428	No
GO:0034308	primary alcohol metabolic process	GOBP	0.154	0.334344	0.745663	-0.411318	No
GO:0043691	reverse cholesterol transport	GOBP	0.087	0	0.402334	-0.402334	No
GO:0007597	blood coagulation, intrinsic pathway	GOBP	0.062	0	0.394278	-0.394278	No
GO:0034375	high-density lipoprotein particle remodeling	GOBP	0.085	0	0.391462	-0.391462	No
GO:0016229	steroid dehydrogenase activity	GOMF	0.048	0	0.389186	-0.389186	No
GO:0002920	regulation of humoral immune response	GOBP	0.088	0.0883508	0.473715	-0.385364	No
KEGG_04610	Complement and coagulation cascades	KEGG	0.155	0.248708	0.623167	-0.37446	No
R-HSA-194068	Bile acid and bile salt metabolism	Reactome	0.131	0.346226	0.715837	-0.36961	No
R-HSA-140877	Formation of Fibrin Clot (Clotting Cascade)	Reactome	0.079	0.0907198	0.458239	-0.367519	No
R-HSA-159418	Recycling of bile acids and salts	Reactome	0.077	0.146808	0.51182	-0.365012	No
GO:0008206	bile acid metabolic process	GOBP	0.095	0.289345	0.638116	-0.348771	No
GO:0008391	arachidonic acid monooxygenase activity	GOMF	0.107	0.225556	0.573579	-0.348023	No
GO:0008392	arachidonic acid epoxygenase activity	GOMF	0.107	0.225556	0.573579	-0.348023	No
GO:1901661	quinone metabolic process	GOBP	0.048	0	0.343972	-0.343972	No
GO:0050994	regulation of lipid catabolic process	GOBP	0.063	0	0.340077	-0.340077	No
GO:0002526	acute inflammatory response	GOBP	0.076	0.0849549	0.422299	-0.337344	No
GO:0034367	macromolecular complex remodeling	GOBP	0.087	0.095956	0.429219	-0.333263	No
GO:0034368	protein-lipid complex remodeling	GOBP	0.087	0.095956	0.429219	-0.333263	No
GO:0034369	plasma lipoprotein particle remodeling	GOBP	0.087	0.095956	0.429219	-0.333263	No
R-HSA-140837	Intrinsic Pathway of Fibrin Clot Formation	Reactome	0.087	0.0925983	0.422195	-0.329596	No
GO:0006721	terpenoid metabolic process	GOBP	0.074	0.119433	0.448982	-0.329549	No
GO:0008209	androgen metabolic process	GOBP	0.034	0	0.32206	-0.32206	No
GO:0008210	estrogen metabolic process	GOBP	0.034	0	0.320084	-0.320084	No
GO:0033764	steroid dehydrogenase activity, acting on the CH-OH group of donors, NAD or NADP as acceptor	GOMF	0.038	0	0.319047	-0.319047	No
GO:0002673	regulation of acute inflammatory response	GOBP	0.071	0.0803954	0.398091	-0.317696	No
GO:0042180	cellular ketone metabolic process	GOBP	0.039	0	0.3103	-0.3103	No
GO:0034377	plasma lipoprotein particle assembly	GOBP	0.06	0	0.306835	-0.306835	No
R-HSA-8963899	Plasma lipoprotein remodeling	Reactome	0.072	0	0.299828	-0.299828	No
GO:0015125	bile acid transmembrane transporter activity	GOMF	0.046	0	0.291615	-0.291615	No
R-HSA-193368	Synthesis of bile acids and bile salts via 7alpha-hydroxycholesterol	Reactome	0.149	0.478389	0.768592	-0.290203	No
GO:0006720	isoprenoid metabolic process	GOBP	0.072	0.151421	0.439898	-0.288477	No
GO:0046461	neutral lipid catabolic process	GOBP	0.065	0.08047	0.368116	-0.287646	No
GO:0046464	acylglycerol catabolic process	GOBP	0.065	0.08047	0.368116	-0.287646	No
GO:0016705	oxidoreductase activity, acting on paired donors, with incorporation or reduction of molecular oxygen	GOMF	0.048	0	0.286066	-0.286066	No
R-HSA-211897	Cytochrome P450 - arranged by substrate type	Reactome	0.122	0.342329	0.626115	-0.283786	No
GO:0001676	long-chain fatty acid metabolic process	GOBP	0.091	0.281549	0.560047	-0.278498	No
GO:0006638	neutral lipid metabolic process	GOBP	0.039	0	0.275348	-0.275348	No
GO:0006639	acylglycerol metabolic process	GOBP	0.039	0	0.275348	-0.275348	No
KEGG_00591	Linoleic acid metabolism	KEGG	0.052	0	0.266861	-0.266861	No
GO:1901616	organic hydroxy compound catabolic process	GOBP	0.051	0.1132	0.379267	-0.266067	No
GO:0015918	sterol transport	GOBP	0.05	0	0.263059	-0.263059	No
GO:0072378	blood coagulation, fibrin clot formation	GOBP	0.065	0.0867514	0.349418	-0.262667	No
GO:0006869	lipid transport	GOBP	0.06	0.121104	0.3814	-0.260296	No
GO:0042304	regulation of fatty acid biosynthetic process	GOBP	0.037	0	0.25976	-0.25976	No
GO:0019217	regulation of fatty acid metabolic process	GOBP	0.049	0	0.258798	-0.258798	No
GO:0065005	protein-lipid complex assembly	GOBP	0.053	0	0.255789	-0.255789	No
GO:0051004	regulation of lipoprotein lipase activity	GOBP	0.056	0	0.247433	-0.247433	No
GO:0072330	monocarboxylic acid biosynthetic process	GOBP	0.063	0.202991	0.450229	-0.247238	No
GO:0071827	plasma lipoprotein particle organization	GOBP	0.07	0.0953724	0.340998	-0.245626	No
GO:0030195	negative regulation of blood coagulation	GOBP	0.05	0	0.244582	-0.244582	No
GO:1900047	negative regulation of hemostasis	GOBP	0.05	0	0.244582	-0.244582	No
GO:0010876	lipid localization	GOBP	0.058	0.115835	0.355471	-0.239636	No
GO:0070613	regulation of protein processing	GOBP	0.061	0.080117	0.319517	-0.2394	No
GO:0034754	cellular hormone metabolic process	GOBP	0.032	0	0.236804	-0.236804	No
GO:1903317	regulation of protein maturation	GOBP	0.063	0.0818104	0.317957	-0.236147	No
GO:0030301	cholesterol transport	GOBP	0.047	0	0.229115	-0.229115	No
GO:0016101	diterpenoid metabolic process	GOBP	0.056	0.106522	0.333856	-0.227334	No
R-HSA-140875	Common Pathway of Fibrin Clot Formation	Reactome	0.063	0.072619	0.29212	-0.219501	No
R-HSA-5365859	RA biosynthesis pathway	Reactome	0.039	0.0708624	0.288818	-0.217955	No
GO:0019825	oxygen binding	GOMF	0.115	0.378547	0.590798	-0.212251	No
GO:0015980	energy derivation by oxidation of organic compounds	GOBP	0.104	0.102445	0.314125	-0.211679	No
GO:0019433	triglyceride catabolic process	GOBP	0.054	0.0802574	0.290465	-0.210207	No
GO:0050996	positive regulation of lipid catabolic process	GOBP	0.036	0	0.209653	-0.209653	No
GO:0006641	triglyceride metabolic process	GOBP	0.05	0.0844752	0.294109	-0.209633	No
GO:0004497	monooxygenase activity	GOMF	0.133	0.486897	0.693903	-0.207006	No
GO:0050819	negative regulation of coagulation	GOBP	0.045	0	0.206561	-0.206561	No
GO:0008202	steroid metabolic process	GOBP	0.117	0.37057	0.569626	-0.199056	No
GO:0015718	monocarboxylic acid transport	GOBP	0.061	0.211954	0.408944	-0.19699	No
GO:0032371	regulation of sterol transport	GOBP	0.034	0	0.194258	-0.194258	No
GO:0032374	regulation of cholesterol transport	GOBP	0.034	0	0.194258	-0.194258	No
GO:0015850	organic hydroxy compound transport	GOBP	0.028	0	0.193687	-0.193687	No
R-HSA-8957322	Metabolism of steroids	Reactome	0.077	0.249193	0.442652	-0.193458	No
GO:1901615	organic hydroxy compound metabolic process	GOBP	0.062	0.13121	0.322864	-0.191654	No
KEGG_00860	Porphyrin and chlorophyll metabolism	KEGG	0.07	0.246106	0.432909	-0.186803	No
R-HSA-174824	Plasma lipoprotein assembly, remodeling, and clearance	Reactome	0.038	0	0.18343	-0.18343	No
GO:0046503	glycerolipid catabolic process	GOBP	0.03	0	0.183064	-0.183064	No
GO:0019318	hexose metabolic process	GOBP	0.028	0.0709243	0.253085	-0.182161	No
GO:0017127	cholesterol transporter activity	GOMF	0.045	0	0.181364	-0.181364	No
R-HSA-6806667	Metabolism of fat-soluble vitamins	Reactome	0.032	0	0.181005	-0.181005	No
R-HSA-156588	Glucuronidation	Reactome	0.188	0.639803	0.819277	-0.179474	No
KEGG_04976	Bile secretion	KEGG	0.058	0.182976	0.359834	-0.176858	No
R-HSA-975634	Retinoid metabolism and transport	Reactome	0.036	0	0.175878	-0.175878	No
GO:0005778	peroxisomal membrane	GOCC	0.099	0.355687	0.530642	-0.174954	No
GO:0031903	microbody membrane	GOCC	0.099	0.355687	0.530642	-0.174954	No
GO:0030574	collagen catabolic process	GOBP	-0.064	-0.226091	-0.0542626	-0.171828	No
GO:0001523	retinoid metabolic process	GOBP	0.049	0.107935	0.27951	-0.171575	No
GO:0000038	very long-chain fatty acid metabolic process	GOBP	0.039	0.0474048	0.218784	-0.171379	No
KEGG_00983	Drug metabolism - other enzymes	KEGG	0.128	0.492725	0.662672	-0.169947	No
GO:0051536	iron-sulfur cluster binding	GOMF	0.04	0.131441	0.301303	-0.169862	No
GO:0051540	metal cluster binding	GOMF	0.04	0.131441	0.301303	-0.169862	No
GO:0046164	alcohol catabolic process	GOBP	0.027	0.0392133	0.208906	-0.169693	No
GO:0006695	cholesterol biosynthetic process	GOBP	0.051	0	0.167396	-0.167396	No
R-HSA-212300	PRC2 methylates histones and DNA	Reactome	-0.028	-0.166326	-0.00244805	-0.163878	No
KEGG_00350	Tyrosine metabolism	KEGG	0.063	0.335616	0.497596	-0.16198	No
GO:0071825	protein-lipid complex subunit organization	GOBP	0.059	0.0932027	0.254903	-0.161701	No
GO:0032963	collagen metabolic process	GOBP	-0.05	-0.210197	-0.0497032	-0.160494	No
KEGG_05322	Systemic lupus erythematosus	KEGG	-0.018	-0.0972537	0.0627718	-0.160026	No
GO:0033344	cholesterol efflux	GOBP	0.031	0	0.159468	-0.159468	No
GO:0042730	fibrinolysis	GOBP	0.052	0.0636702	0.219984	-0.156314	No
GO:0016125	sterol metabolic process	GOBP	0.063	0.135633	0.291941	-0.156309	No
GO:0034470	ncRNA processing	GOBP	-0.064	-0.254067	-0.0983214	-0.155746	No
R-HSA-5362517	Signaling by Retinoic Acid	Reactome	0.018	0	0.154098	-0.154098	No
R-HSA-9006931	Signaling by Nuclear Receptors	Reactome	0.018	0	0.154098	-0.154098	No
R-HSA-1566948	Elastic fibre formation	Reactome	-0.027	-0.175263	-0.0212396	-0.154024	No
GO:0090207	regulation of triglyceride metabolic process	GOBP	0.024	0	0.152149	-0.152149	No
GO:0016126	sterol biosynthetic process	GOBP	0.053	0	0.152092	-0.152092	No
GO:1902653	secondary alcohol biosynthetic process	GOBP	0.053	0	0.151302	-0.151302	No
KEGG_00830	Retinol metabolism	KEGG	0.221	0.686523	0.837646	-0.151123	No
R-HSA-1442490	Collagen degradation	Reactome	-0.046	-0.183155	-0.0356957	-0.14746	No
GO:0015914	phospholipid transport	GOBP	0.025	0	0.146511	-0.146511	No
R-HSA-2129379	Molecules associated with elastic fibres	Reactome	-0.011	-0.144936	0	-0.144936	No
R-HSA-2022090	Assembly of collagen fibrils and other multimeric structures	Reactome	-0.047	-0.217457	-0.0730545	-0.144402	No
GO:0055088	lipid homeostasis	GOBP	0.059	0.110966	0.254658	-0.143692	No
KEGG_04975	Fat digestion and absorption	KEGG	0.026	0	0.143245	-0.143245	No
R-HSA-5579029	Metabolic disorders of biological oxidation enzymes	Reactome	0.023	0.0745803	0.215137	-0.140556	No
GO:0044429	mitochondrial part	GOCC	0.152	0.37118	0.511377	-0.140197	No
GO:0042744	hydrogen peroxide catabolic process	GOBP	0.012	0	0.136655	-0.136655	No
R-HSA-8948216	Collagen chain trimerization	Reactome	-0.053	-0.155801	-0.0193154	-0.136486	No
GO:0031639	plasminogen activation	GOBP	0.03	0	0.13599	-0.13599	No
GO:0016485	protein processing	GOBP	0.042	0.0806278	0.214573	-0.133945	No
GO:0061045	negative regulation of wound healing	GOBP	0.034	0	0.133025	-0.133025	No
GO:1901685	glutathione derivative metabolic process	GOBP	0.026	0.0587089	0.190335	-0.131626	No
GO:1901687	glutathione derivative biosynthetic process	GOBP	0.026	0.0587089	0.190335	-0.131626	No
GO:0008203	cholesterol metabolic process	GOBP	0.057	0.132158	0.262588	-0.130431	No
GO:0005319	lipid transporter activity	GOMF	0.031	0	0.130223	-0.130223	No
GO:0046320	regulation of fatty acid oxidation	GOBP	0.02	0	0.129909	-0.129909	No
GO:1902652	secondary alcohol metabolic process	GOBP	0.057	0.132485	0.261904	-0.129419	No
GO:0020037	heme binding	GOMF	0.017	0	0.127844	-0.127844	No
R-HSA-5625886	Activated PKN1 stimulates transcription of AR (androgen receptor) regulated genes KLK2 and KLK3	Reactome	-0.02	-0.0917701	0.0350091	-0.126779	No
GO:0140053	mitochondrial gene expression	GOBP	0.115	0.073401	0.199824	-0.126423	No
GO:1990204	oxidoreductase complex	GOCC	0.123	0.188284	0.31331	-0.125026	No
R-HSA-5625740	RHO GTPases activate PKNs	Reactome	-0.013	-0.107224	0.0153042	-0.122528	No
GO:0043062	extracellular structure organization	GOBP	-0.05	-0.176265	-0.0537412	-0.122524	No
GO:0015748	organophosphate ester transport	GOBP	0.022	0	0.122401	-0.122401	No
R-HSA-1474244	Extracellular matrix organization	Reactome	-0.038	-0.17501	-0.053506	-0.121504	No
GO:0051188	cofactor biosynthetic process	GOBP	0.078	0.194602	0.314162	-0.11956	No
KEGG_05140	Leishmaniasis	KEGG	-0.046	-0.173597	-0.0555945	-0.118003	No
GO:1903035	negative regulation of response to wounding	GOBP	0.03	0	0.117286	-0.117286	No
GO:0006706	steroid catabolic process	GOBP	0.019	0	0.116288	-0.116288	No
GO:0006084	acetyl-CoA metabolic process	GOBP	0.048	0.0779839	0.19351	-0.115527	No
GO:0030199	collagen fibril organization	GOBP	-0.017	-0.115206	0	-0.115206	No
GO:0022613	ribonucleoprotein complex biogenesis	GOBP	-0.08	-0.207839	-0.0931837	-0.114656	No
GO:0006414	translational elongation	GOBP	0.068	0.0631676	0.177341	-0.114174	No
GO:0004745	retinol dehydrogenase activity	GOMF	0.025	0	0.113633	-0.113633	No
R-HSA-166663	Initial triggering of complement	Reactome	0.045	0.111012	0.22335	-0.112338	No
GO:0034660	ncRNA metabolic process	GOBP	-0.03	-0.197248	-0.0855579	-0.11169	No
GO:0090181	regulation of cholesterol metabolic process	GOBP	0.036	0	0.110886	-0.110886	No
GO:0030198	extracellular matrix organization	GOBP	-0.051	-0.176002	-0.0657631	-0.110239	No
KEGG_04512	ECM-receptor interaction	KEGG	-0.024	-0.109679	0	-0.109679	No
R-HSA-611105	Respiratory electron transport	Reactome	0.131	0.244253	0.353732	-0.109479	No
KEGG_00980	Metabolism of xenobiotics by cytochrome P450	KEGG	0.201	0.688524	0.797145	-0.108621	No
KEGG_04380	Osteoclast differentiation	KEGG	-0.051	-0.180293	-0.0721649	-0.108128	No
GO:0042632	cholesterol homeostasis	GOBP	0.05	0.106908	0.214929	-0.108021	No
GO:0055092	sterol homeostasis	GOBP	0.05	0.106908	0.214929	-0.108021	No
R-HSA-2187338	Visual phototransduction	Reactome	0.012	0	0.106953	-0.106953	No
GO:0006690	icosanoid metabolic process	GOBP	0.043	0.159114	0.266008	-0.106894	No
R-HSA-6784531	tRNA processing in the nucleus	Reactome	0.022	-0.105857	0	-0.105857	No
GO:0016073	snRNA metabolic process	GOBP	-0.005	-0.10544	0	-0.10544	No
R-HSA-8953854	Metabolism of RNA	Reactome	-0.055	-0.209051	-0.10424	-0.104811	No
R-HSA-2299718	Condensation of Prophase Chromosomes	Reactome	-0.014	-0.100223	0.00429845	-0.104521	No
GO:0051187	cofactor catabolic process	GOBP	0.026	0	0.103723	-0.103723	No
R-HSA-6783783	Interleukin-10 signaling	Reactome	-0.046	-0.145571	-0.0425252	-0.103046	No
GO:0032461	positive regulation of protein oligomerization	GOBP	-0.003	-0.1024	0	-0.1024	No
GO:0006415	translational termination	GOBP	0.088	0.0636457	0.166019	-0.102373	No
KEGG_05012	Parkinson's disease	KEGG	0.076	0.0722366	0.174104	-0.101867	No
GO:0070126	mitochondrial translational termination	GOBP	0.089	0.0610323	0.162719	-0.101686	No
R-HSA-5334118	DNA methylation	Reactome	-0.021	-0.0951041	0.00464211	-0.0997463	No
R-HSA-73728	RNA Polymerase I Promoter Opening	Reactome	-0.021	-0.0920184	0.00721176	-0.0992302	No
GO:0010565	regulation of cellular ketone metabolic process	GOBP	0.02	0	0.0979274	-0.0979274	No
GO:0006465	signal peptide processing	GOBP	0.022	0	0.0976063	-0.0976063	No
R-HSA-163210	Formation of ATP by chemiosmotic coupling	Reactome	0.045	0	0.097145	-0.097145	No
R-HSA-212165	Epigenetic regulation of gene expression	Reactome	-0.012	-0.132356	-0.0362178	-0.0961387	No
GO:0033260	nuclear DNA replication	GOBP	0.026	-0.129452	-0.0337751	-0.0956768	No
GO:0006633	fatty acid biosynthetic process	GOBP	0.029	0.0827349	0.178384	-0.0956495	No
R-HSA-5368286	Mitochondrial translation initiation	Reactome	0.101	0.0978601	0.193343	-0.0954826	No
GO:0006694	steroid biosynthetic process	GOBP	0.042	0.12746	0.222832	-0.0953718	No
R-HSA-3000178	ECM proteoglycans	Reactome	-0.039	-0.187689	-0.0924229	-0.0952665	No
GO:0006396	RNA processing	GOBP	-0.049	-0.136757	-0.0417077	-0.0950491	No
R-HSA-5250913	Positive epigenetic regulation of rRNA expression	Reactome	-0.018	-0.126067	-0.0322466	-0.0938209	No
GO:0033559	unsaturated fatty acid metabolic process	GOBP	0.052	0.220696	0.313985	-0.0932891	No
R-HSA-5368287	Mitochondrial translation	Reactome	0.109	0.100485	0.193508	-0.0930224	No
R-HSA-73864	RNA Polymerase I Transcription	Reactome	-0.013	-0.124053	-0.0318017	-0.0922515	No
GO:0071216	cellular response to biotic stimulus	GOBP	-0.007	-0.0915055	0	-0.0915055	No
GO:0035384	thioester biosynthetic process	GOBP	0.061	0	0.0911196	-0.0911196	No
GO:0071616	acyl-CoA biosynthetic process	GOBP	0.061	0	0.0911196	-0.0911196	No
R-HSA-1428517	The citric acid (TCA) cycle and respiratory electron transport	Reactome	0.162	0.323786	0.414644	-0.0908578	No
R-HSA-73854	RNA Polymerase I Promoter Clearance	Reactome	-0.015	-0.122537	-0.0326088	-0.0899283	No
GO:0005753	mitochondrial proton-transporting ATP synthase complex	GOCC	0.043	0	0.0898495	-0.0898495	No
GO:0045259	proton-transporting ATP synthase complex	GOCC	0.043	0	0.0898495	-0.0898495	No
GO:0032496	response to lipopolysaccharide	GOBP	-0.017	-0.0895092	0	-0.0895092	No
GO:0050892	intestinal absorption	GOBP	0.029	0	0.0894179	-0.0894179	No
GO:0008028	monocarboxylic acid transmembrane transporter activity	GOMF	0.014	0	0.0888261	-0.0888261	No
GO:1901568	fatty acid derivative metabolic process	GOBP	0.061	0.257759	0.346394	-0.0886349	No
R-HSA-69239	Synthesis of DNA	Reactome	0.06	-0.0870849	0	-0.0870849	No
GO:0004364	glutathione transferase activity	GOMF	0.008	0	0.0866037	-0.0866037	No
R-HSA-73777	RNA Polymerase I Chain Elongation	Reactome	-0.012	-0.113665	-0.0272652	-0.0863994	No
GO:0042827	platelet dense granule	GOCC	0.011	0	0.086297	-0.086297	No
R-HSA-3000171	Non-integrin membrane-ECM interactions	Reactome	-0.004	-0.108956	-0.0234112	-0.085545	No
GO:0022900	electron transport chain	GOBP	0.125	0.183174	0.268424	-0.0852497	No
GO:0022904	respiratory electron transport chain	GOBP	0.125	0.183174	0.268424	-0.0852497	No
GO:0006261	DNA-dependent DNA replication	GOBP	0.037	-0.174775	-0.089581	-0.085194	No
R-HSA-8949613	Cristae formation	Reactome	0.063	0	0.0848418	-0.0848418	No
GO:0060333	interferon-gamma-mediated signaling pathway	GOBP	-0.04	-0.0966613	-0.0121647	-0.0844965	No
GO:0019369	arachidonic acid metabolic process	GOBP	0.045	0.175568	0.259656	-0.0840878	No
R-HSA-1221632	Meiotic synapsis	Reactome	-0.007	-0.0555957	0.0283784	-0.0839741	No
R-HSA-72306	tRNA processing	Reactome	0.021	-0.0835312	0	-0.0835312	No
R-HSA-191859	snRNP Assembly	Reactome	0.022	-0.118494	-0.0357843	-0.0827097	No
R-HSA-194441	Metabolism of non-coding RNA	Reactome	0.022	-0.118494	-0.0357843	-0.0827097	No
GO:0071219	cellular response to molecule of bacterial origin	GOBP	-0.015	-0.081931	0	-0.081931	No
GO:0097060	synaptic membrane	GOCC	-0.022	-0.0816316	0	-0.0816316	No
GO:0000377	RNA splicing, via transesterification reactions with bulged adenosine as nucleophile	GOBP	-0.052	-0.12371	-0.0421114	-0.0815991	No
GO:0000398	mRNA splicing, via spliceosome	GOBP	-0.052	-0.12371	-0.0421114	-0.0815991	No
GO:0000375	RNA splicing, via transesterification reactions	GOBP	-0.052	-0.123573	-0.0423253	-0.0812473	No
GO:0007268	chemical synaptic transmission	GOBP	-0.011	-0.0811245	0	-0.0811245	No
GO:0098916	anterograde trans-synaptic signaling	GOBP	-0.011	-0.0811245	0	-0.0811245	No
GO:0099536	synaptic signaling	GOBP	-0.011	-0.0811245	0	-0.0811245	No
GO:0099537	trans-synaptic signaling	GOBP	-0.011	-0.0811245	0	-0.0811245	No
GO:1900449	regulation of glutamate receptor signaling pathway	GOBP	-0.015	-0.081015	0	-0.081015	No
GO:0071222	cellular response to lipopolysaccharide	GOBP	-0.019	-0.0810051	0	-0.0810051	No
R-HSA-191273	Cholesterol biosynthesis	Reactome	0.056	0.0728843	0.153451	-0.0805667	No
GO:0042407	cristae formation	GOBP	0.048	0	0.0805445	-0.0805445	No
GO:0099601	regulation of neurotransmitter receptor activity	GOBP	-0.016	-0.0802693	0	-0.0802693	No
GO:1901988	negative regulation of cell cycle phase transition	GOBP	-0.001	-0.0778258	0	-0.0778258	No
GO:1901991	negative regulation of mitotic cell cycle phase transition	GOBP	-0.001	-0.0776647	0	-0.0776647	No
GO:0009295	nucleoid	GOCC	0.024	0.0364758	0.113711	-0.0772353	No
GO:0042645	mitochondrial nucleoid	GOCC	0.024	0.0364758	0.113711	-0.0772353	No
GO:0006066	alcohol metabolic process	GOBP	0.039	0.0997076	0.176725	-0.0770174	No
GO:0035337	fatty-acyl-CoA metabolic process	GOBP	0.04	0	0.076463	-0.076463	No
GO:0016874	ligase activity	GOMF	0.042	0.0788718	0.155313	-0.0764411	No
R-HSA-162909	Host Interactions of HIV factors	Reactome	-0.013	-0.0763552	0	-0.0763552	No
R-HSA-5389840	Mitochondrial translation elongation	Reactome	0.096	0.0981191	0.17432	-0.0762008	No
GO:0070125	mitochondrial translational elongation	GOBP	0.095	0.09738	0.17312	-0.0757402	No
R-HSA-2559586	DNA Damage/Telomere Stress Induced Senescence	Reactome	-0.01	-0.0530722	0.02226	-0.0753322	No
R-HSA-211976	Endogenous sterols	Reactome	0.008	0	0.0751091	-0.0751091	No
R-HSA-171306	Packaging Of Telomere Ends	Reactome	-0.014	-0.0454522	0.0293722	-0.0748244	No
GO:0032543	mitochondrial translation	GOBP	0.115	0.0998783	0.174681	-0.074803	No
R-HSA-1500620	Meiosis	Reactome	-0.002	-0.057743	0.0161067	-0.0738497	No
GO:0034199	activation of protein kinase A activity	GOBP	-0.004	-0.0738179	0	-0.0738179	No
KEGG_00500	Starch and sucrose metabolism	KEGG	0.095	0.437238	0.509669	-0.0724314	No
GO:0032368	regulation of lipid transport	GOBP	0.012	0	0.0722558	-0.0722558	No
GO:0097164	ammonium ion metabolic process	GOBP	0.021	0.0620638	0.133818	-0.0717538	No
GO:0016137	glycoside metabolic process	GOBP	0.025	0.0449843	0.116713	-0.0717285	No
GO:0019216	regulation of lipid metabolic process	GOBP	0.018	0	0.0717213	-0.0717213	No
R-HSA-163200	Respiratory electron transport, ATP synthesis by chemiosmotic coupling, and heat production by uncoupling proteins.	Reactome	0.136	0.238894	0.310504	-0.0716102	No
GO:0098878	neurotransmitter receptor complex	GOCC	-0.016	-0.0711222	0	-0.0711222	No
GO:0006536	glutamate metabolic process	GOBP	0.052	0.281468	0.352484	-0.0710157	No
GO:0042776	mitochondrial ATP synthesis coupled proton transport	GOBP	0.045	0	0.0705446	-0.0705446	No
R-HSA-174184	Cdc20:Phospho-APC/C mediated degradation of Cyclin A	Reactome	0.022	-0.0700302	0	-0.0700302	No
R-HSA-179419	APC:Cdc20 mediated degradation of cell cycle proteins prior to satisfation of the cell cycle checkpoint	Reactome	0.023	-0.069799	0	-0.069799	No
GO:0002224	toll-like receptor signaling pathway	GOBP	-0.009	-0.0697067	0	-0.0697067	No
GO:0051439	regulation of ubiquitin-protein ligase activity involved in mitotic cell cycle	GOBP	0.018	-0.0694377	0	-0.0694377	No
GO:0019218	regulation of steroid metabolic process	GOBP	0.016	0	0.069369	-0.069369	No
GO:0002755	MyD88-dependent toll-like receptor signaling pathway	GOBP	-0.004	-0.0689999	0	-0.0689999	No
GO:0031145	anaphase-promoting complex-dependent catabolic process	GOBP	0.016	-0.068653	0	-0.068653	No
R-HSA-176408	Regulation of APC/C activators between G1/S and early anaphase	Reactome	0.019	-0.0681808	0	-0.0681808	No
R-HSA-176409	APC/C:Cdc20 mediated degradation of mitotic proteins	Reactome	0.023	-0.0675782	0	-0.0675782	No
R-HSA-427389	ERCC6 (CSB) and EHMT2 (G9a) positively regulate rRNA expression	Reactome	-0.025	-0.114279	-0.0467721	-0.0675072	No
R-HSA-69481	G2/M Checkpoints	Reactome	0.059	-0.0847159	-0.0175179	-0.067198	No
GO:0044772	mitotic cell cycle phase transition	GOBP	0.012	-0.0667876	0	-0.0667876	No
GO:0044770	cell cycle phase transition	GOBP	0.009	-0.0665278	0	-0.0665278	No
R-HSA-157579	Telomere Maintenance	Reactome	0.004	-0.0535048	0.0127259	-0.0662307	No
R-HSA-176814	Activation of APC/C and APC/C:Cdc20 mediated degradation of mitotic proteins	Reactome	0.026	-0.0660634	0	-0.0660634	No
GO:0002521	leukocyte differentiation	GOBP	-0.019	-0.0656049	0	-0.0656049	No
GO:0005743	mitochondrial inner membrane	GOCC	0.111	0.210685	0.275578	-0.0648929	No
R-HSA-5419276	Mitochondrial translation termination	Reactome	0.09	0.097326	0.162125	-0.0647985	No
R-HSA-174143	APC/C-mediated degradation of cell cycle proteins	Reactome	0.03	-0.0647531	0	-0.0647531	No
R-HSA-453276	Regulation of mitotic cell cycle	Reactome	0.03	-0.0647531	0	-0.0647531	No
R-HSA-164378	PKA activation in glucagon signalling	Reactome	-0.002	-0.0643672	0	-0.0643672	No
R-HSA-1650814	Collagen biosynthesis and modifying enzymes	Reactome	-0.047	-0.0814472	-0.0171745	-0.0642727	No
GO:0042573	retinoic acid metabolic process	GOBP	0.011	0	0.0640847	-0.0640847	No
GO:1902105	regulation of leukocyte differentiation	GOBP	-0.018	-0.0640507	0	-0.0640507	No
GO:0044262	cellular carbohydrate metabolic process	GOBP	0.006	0	0.0640139	-0.0640139	No
GO:0005746	mitochondrial respiratory chain	GOCC	0.099	0.133426	0.19743	-0.0640038	No
R-HSA-2453902	The canonical retinoid cycle in rods (twilight vision)	Reactome	0.013	0	0.0638921	-0.0638921	No
GO:0002237	response to molecule of bacterial origin	GOBP	-0.017	-0.0630948	0	-0.0630948	No
R-HSA-5250924	B-WICH complex positively regulates rRNA expression	Reactome	-0.011	-0.0571944	0.00589702	-0.0630914	No
R-HSA-168898	Toll-Like Receptors Cascades	Reactome	-0.006	-0.0628887	0	-0.0628887	No
GO:0070469	respiratory chain	GOCC	0.103	0.133446	0.196217	-0.0627704	No
R-HSA-382556	ABC-family proteins mediated transport	Reactome	0.007	0	0.0626634	-0.0626634	No
KEGG_04062	Chemokine signaling pathway	KEGG	-0.01	-0.0624952	0	-0.0624952	No
GO:0005977	glycogen metabolic process	GOBP	0.01	0	0.0620123	-0.0620123	No
GO:0007063	regulation of sister chromatid cohesion	GOBP	-0.002	-0.0619792	0	-0.0619792	No
GO:0030098	lymphocyte differentiation	GOBP	-0.04	-0.0617634	0	-0.0617634	No
GO:0032369	negative regulation of lipid transport	GOBP	0.015	0	0.0615179	-0.0615179	No
R-HSA-69300	Removal of licensing factors from origins	Reactome	0.037	-0.0614003	0	-0.0614003	No
GO:0007007	inner mitochondrial membrane organization	GOBP	0.04	0	0.061387	-0.061387	No
GO:0051604	protein maturation	GOBP	0.017	0	0.0611885	-0.0611885	No
GO:0002886	regulation of myeloid leukocyte mediated immunity	GOBP	-0.003	-0.060652	0	-0.060652	No
KEGG_03030	DNA replication	KEGG	0.027	-0.126773	-0.0662165	-0.0605565	No
R-HSA-606279	Deposition of new CENPA-containing nucleosomes at the centromere	Reactome	0.005	-0.0927605	-0.0323388	-0.0604217	No
R-HSA-774815	Nucleosome assembly	Reactome	0.005	-0.0927605	-0.0323388	-0.0604217	No
GO:0009301	snRNA transcription	GOBP	-0.005	-0.060382	0	-0.060382	No
GO:0042795	snRNA transcription from RNA polymerase II promoter	GOBP	-0.005	-0.060382	0	-0.060382	No
GO:0006637	acyl-CoA metabolic process	GOBP	0.132	0.478171	0.53844	-0.0602689	No
GO:0035383	thioester metabolic process	GOBP	0.132	0.478171	0.53844	-0.0602689	No
R-HSA-6807505	RNA polymerase II transcribes snRNA genes	Reactome	-0.006	-0.0601267	0	-0.0601267	No
GO:0016071	mRNA metabolic process	GOBP	-0.061	-0.0865726	-0.0264702	-0.0601024	No
GO:0009112	nucleobase metabolic process	GOBP	0.012	0	0.0600434	-0.0600434	No
GO:0070325	lipoprotein particle receptor binding	GOMF	0.021	0	0.0599853	-0.0599853	No
GO:0000082	G1/S transition of mitotic cell cycle	GOBP	-0.001	-0.0592964	0	-0.0592964	No
GO:0044843	cell cycle G1/S phase transition	GOBP	0.002	-0.0591952	0	-0.0591952	No
GO:0097006	regulation of plasma lipoprotein particle levels	GOBP	0.035	0.0839743	0.143168	-0.0591932	No
R-HSA-912446	Meiotic recombination	Reactome	0.006	-0.0526978	0.00646018	-0.059158	No
GO:0006354	DNA-templated transcription, elongation	GOBP	0.003	-0.0591541	0	-0.0591541	No
GO:0006754	ATP biosynthetic process	GOBP	0.018	0	0.059087	-0.059087	No
GO:0050764	regulation of phagocytosis	GOBP	-0.003	-0.0587355	0	-0.0587355	No
GO:0008380	RNA splicing	GOBP	-0.03	-0.0812489	-0.0225501	-0.0586988	No
R-HSA-72202	Transport of Mature Transcript to Cytoplasm	Reactome	-0.008	-0.100415	-0.0423756	-0.0580392	No
GO:0030217	T cell differentiation	GOBP	-0.025	-0.0579194	0	-0.0579194	No
GO:0006397	mRNA processing	GOBP	-0.03	-0.0812072	-0.023391	-0.0578162	No
GO:0000786	nucleosome	GOCC	-0.006	-0.0530142	0.00474276	-0.057757	No
GO:0044241	lipid digestion	GOBP	0.014	0	0.0574407	-0.0574407	No
GO:0015248	sterol transporter activity	GOMF	0.02	0	0.0573255	-0.0573255	No
KEGG_05010	Alzheimer's disease	KEGG	0.037	0	0.0572046	-0.0572046	No
R-HSA-69306	DNA Replication	Reactome	0.059	-0.0858901	-0.0286905	-0.0571996	No
GO:0016702	oxidoreductase activity, acting on single donors with incorporation of molecular oxygen, incorporation of two atoms of oxygen	GOMF	0.007	0	0.0571302	-0.0571302	No
GO:0044259	multicellular organismal macromolecule metabolic process	GOBP	-0.042	-0.0905496	-0.033424	-0.0571257	No
R-HSA-201722	Formation of the beta-catenin:TCF transactivating complex	Reactome	-0.026	-0.113054	-0.0559471	-0.057107	No
R-HSA-69615	G1/S DNA Damage Checkpoints	Reactome	0	-0.0570393	0	-0.0570393	No
GO:0045922	negative regulation of fatty acid metabolic process	GOBP	0.004	0	0.0568557	-0.0568557	No
R-HSA-69206	G1/S Transition	Reactome	0.058	-0.0565225	0	-0.0565225	No
GO:0006368	transcription elongation from RNA polymerase II promoter	GOBP	-0.004	-0.0563761	0	-0.0563761	No
KEGG_04115	p53 signaling pathway	KEGG	-0.002	-0.056147	0	-0.056147	No
GO:0046460	neutral lipid biosynthetic process	GOBP	0.017	0	0.0560389	-0.0560389	No
GO:0046463	acylglycerol biosynthetic process	GOBP	0.017	0	0.0560389	-0.0560389	No
GO:0019866	organelle inner membrane	GOCC	0.084	0.159253	0.215184	-0.0559309	No
GO:0098781	ncRNA transcription	GOBP	-0.002	-0.0557008	0	-0.0557008	No
GO:0010830	regulation of myotube differentiation	GOBP	-0.003	-0.0556415	0	-0.0556415	No
GO:0060326	cell chemotaxis	GOBP	-0.021	-0.0556368	0	-0.0556368	No
GO:0034381	plasma lipoprotein particle clearance	GOBP	0.027	0.070502	0.125776	-0.0552737	No
GO:0051287	NAD binding	GOMF	0.116	0.607875	0.66302	-0.0551444	No
GO:0006968	cellular defense response	GOBP	-0.017	-0.0541051	0	-0.0541051	No
GO:1905952	regulation of lipid localization	GOBP	0.01	0	0.0537834	-0.0537834	No
R-HSA-453279	Mitotic G1-G1/S phases	Reactome	0.048	-0.0534862	0	-0.0534862	No
R-HSA-2173782	Binding and Uptake of Ligands by Scavenger Receptors	Reactome	0.014	0.0606462	0.113529	-0.0528826	No
GO:0005581	collagen trimer	GOCC	-0.052	-0.154824	-0.102054	-0.0527693	No
R-HSA-167172	Transcription of the HIV genome	Reactome	-0.001	-0.0524221	0	-0.0524221	No
GO:0033293	monocarboxylic acid binding	GOMF	0.007	0	0.0524041	-0.0524041	No
GO:0071682	endocytic vesicle lumen	GOCC	0.008	0	0.0522109	-0.0522109	No
GO:0046906	tetrapyrrole binding	GOMF	0.01	0	0.0521125	-0.0521125	No
GO:1902749	regulation of cell cycle G2/M phase transition	GOBP	0.011	-0.0705659	-0.0185095	-0.0520564	No
KEGG_00100	Steroid biosynthesis	KEGG	0.011	0	0.0515912	-0.0515912	No
KEGG_04110	Cell cycle	KEGG	0.024	-0.127174	-0.0759313	-0.0512424	No
R-HSA-202403	TCR signaling	Reactome	-0.028	-0.0506742	0	-0.0506742	No
GO:0045540	regulation of cholesterol biosynthetic process	GOBP	0.02	0	0.0501182	-0.0501182	No
GO:0006006	glucose metabolic process	GOBP	0.021	0.0694437	0.119147	-0.049703	No
GO:0033045	regulation of sister chromatid segregation	GOBP	-0.004	-0.0496994	0	-0.0496994	No
R-HSA-1474290	Collagen formation	Reactome	-0.038	-0.118718	-0.0695733	-0.0491451	No
GO:0006353	DNA-templated transcription, termination	GOBP	-0.002	-0.0491065	0	-0.0491065	No
GO:0006270	DNA replication initiation	GOBP	0.03	-0.048997	0	-0.048997	No
GO:0006334	nucleosome assembly	GOBP	-0.003	-0.0968953	-0.0481096	-0.0487857	No
GO:0009142	nucleoside triphosphate biosynthetic process	GOBP	0.015	0	0.0486439	-0.0486439	No
GO:0031967	organelle envelope	GOCC	0.029	0	0.0482927	-0.0482927	No
GO:0031975	envelope	GOCC	0.029	0	0.0482927	-0.0482927	No
GO:0003071	renal system process involved in regulation of systemic arterial blood pressure	GOBP	0.012	0.0360169	0.0836079	-0.047591	No
GO:0016628	oxidoreductase activity, acting on the CH-CH group of donors, NAD or NADP as acceptor	GOMF	0.051	0.0610098	0.108011	-0.047001	No
GO:0031304	intrinsic component of mitochondrial inner membrane	GOCC	0.018	0	0.0468398	-0.0468398	No
GO:0031305	integral component of mitochondrial inner membrane	GOCC	0.02	0	0.0466076	-0.0466076	No
GO:0070979	protein K11-linked ubiquitination	GOBP	0	-0.0465111	0	-0.0465111	No
R-HSA-73886	Chromosome Maintenance	Reactome	0.024	-0.086431	-0.0399522	-0.0464788	No
GO:1901618	organic hydroxy compound transmembrane transporter activity	GOMF	0.009	0	0.0464706	-0.0464706	No
KEGG_00900	Terpenoid backbone biosynthesis	KEGG	0.02	0	0.0463167	-0.0463167	No
R-HSA-72203	Processing of Capped Intron-Containing Pre-mRNA	Reactome	-0.049	-0.123367	-0.07734	-0.0460271	No
GO:0031638	zymogen activation	GOBP	0.019	0	0.0460247	-0.0460247	No
GO:0006369	termination of RNA polymerase II transcription	GOBP	-0.004	-0.0459813	0	-0.0459813	No
GO:1905953	negative regulation of lipid localization	GOBP	0.011	0	0.0456367	-0.0456367	No
R-HSA-8963889	Assembly of active LPL and LIPC lipase complexes	Reactome	0.023	0	0.045448	-0.045448	No
GO:0009108	coenzyme biosynthetic process	GOBP	0.08	0.227525	0.272971	-0.0454457	No
GO:0002230	positive regulation of defense response to virus by host	GOBP	0.003	0	0.0450992	-0.0450992	No
GO:0043596	nuclear replication fork	GOCC	0.027	-0.0445462	0	-0.0445462	No
GO:0004867	serine-type endopeptidase inhibitor activity	GOMF	0.027	0.0552003	0.099273	-0.0440726	No
GO:0046034	ATP metabolic process	GOBP	0.037	0	0.0435716	-0.0435716	No
GO:0004386	helicase activity	GOMF	-0.009	-0.0569195	-0.0134119	-0.0435077	No
GO:0015985	energy coupled proton transport, down electrochemical gradient	GOBP	0.02	0	0.0433292	-0.0433292	No
GO:0015986	ATP synthesis coupled proton transport	GOBP	0.02	0	0.0433292	-0.0433292	No
GO:0030397	membrane disassembly	GOBP	-0.004	-0.0646569	-0.0214632	-0.0431937	No
GO:0051081	nuclear envelope disassembly	GOBP	-0.004	-0.0646569	-0.0214632	-0.0431937	No
GO:0009199	ribonucleoside triphosphate metabolic process	GOBP	0.04	0	0.0431864	-0.0431864	No
GO:0009205	purine ribonucleoside triphosphate metabolic process	GOBP	0.04	0	0.0430445	-0.0430445	No
GO:0009144	purine nucleoside triphosphate metabolic process	GOBP	0.041	0	0.0430024	-0.0430024	No
R-HSA-2980766	Nuclear Envelope Breakdown	Reactome	0.007	-0.0643932	-0.0214275	-0.0429657	No
GO:0042562	hormone binding	GOMF	0.004	0	0.0429047	-0.0429047	No
GO:0019835	cytolysis	GOBP	0.015	0	0.0426328	-0.0426328	No
GO:0009141	nucleoside triphosphate metabolic process	GOBP	0.034	0	0.0423122	-0.0423122	No
R-HSA-196854	Metabolism of vitamins and cofactors	Reactome	0.089	0.406435	0.448488	-0.0420529	No
GO:0030515	snoRNA binding	GOMF	-0.009	-0.0718432	-0.0299919	-0.0418513	No
R-HSA-877300	Interferon gamma signaling	Reactome	-0.022	-0.0292884	0.0123409	-0.0416293	No
GO:0009161	ribonucleoside monophosphate metabolic process	GOBP	0.037	0	0.0414119	-0.0414119	No
GO:0071347	cellular response to interleukin-1	GOBP	-0.006	-0.0412588	0	-0.0412588	No
GO:0009126	purine nucleoside monophosphate metabolic process	GOBP	0.035	0	0.041172	-0.041172	No
GO:0009167	purine ribonucleoside monophosphate metabolic process	GOBP	0.035	0	0.041172	-0.041172	No
GO:0009123	nucleoside monophosphate metabolic process	GOBP	0.035	0	0.0409706	-0.0409706	No
R-HSA-1236975	Antigen processing-Cross presentation	Reactome	-0.018	-0.0615524	-0.0207608	-0.0407916	No
GO:0007077	mitotic nuclear envelope disassembly	GOBP	0.003	-0.0621976	-0.0214941	-0.0407036	No
GO:0007062	sister chromatid cohesion	GOBP	0.036	-0.185317	-0.144772	-0.0405449	No
R-HSA-69304	Regulation of DNA replication	Reactome	0.036	-0.057073	-0.0166014	-0.0404716	No
KEGG_05016	Huntington's disease	KEGG	0.025	0	0.0403079	-0.0403079	No
GO:0005740	mitochondrial envelope	GOCC	0.084	0.166711	0.206936	-0.0402246	No
KEGG_05145	Toxoplasmosis	KEGG	-0.001	-0.0401783	0	-0.0401783	No
GO:0016408	C-acyltransferase activity	GOMF	0.1	0.683105	0.723225	-0.0401197	No
GO:0002478	antigen processing and presentation of exogenous peptide antigen	GOBP	-0.002	-0.065297	-0.0252617	-0.0400353	No
GO:0042254	ribosome biogenesis	GOBP	-0.105	-0.199375	-0.159509	-0.0398664	No
GO:0042773	ATP synthesis coupled electron transport	GOBP	0.087	0.109939	0.14979	-0.0398504	No
GO:0019432	triglyceride biosynthetic process	GOBP	0.014	0	0.0398012	-0.0398012	No
GO:0048247	lymphocyte chemotaxis	GOBP	-0.025	-0.0397791	0	-0.0397791	No
R-HSA-909733	Interferon alpha/beta signaling	Reactome	-0.041	-0.0262904	0.0133578	-0.0396482	No
GO:0000313	organellar ribosome	GOCC	0.074	0.0572499	0.0962378	-0.0389879	No
GO:0005761	mitochondrial ribosome	GOCC	0.074	0.0572499	0.0962378	-0.0389879	No
GO:0006112	energy reserve metabolic process	GOBP	0.011	0	0.0388602	-0.0388602	No
R-HSA-159236	Transport of Mature mRNA derived from an Intron-Containing Transcript	Reactome	-0.014	-0.0802775	-0.0414543	-0.0388232	No
GO:0031966	mitochondrial membrane	GOCC	0.086	0.167667	0.206299	-0.038632	No
R-HSA-68874	M/G1 Transition	Reactome	0.052	-0.0545247	-0.0159117	-0.038613	No
R-HSA-69002	DNA Replication Pre-Initiation	Reactome	0.052	-0.0545247	-0.0159117	-0.038613	No
GO:0050691	regulation of defense response to virus by host	GOBP	0.002	0	0.0385792	-0.0385792	No
GO:0042379	chemokine receptor binding	GOMF	-0.009	-0.0384665	0	-0.0384665	No
R-HSA-6785807	Interleukin-4 and 13 signaling	Reactome	-0.027	-0.0383998	0	-0.0383998	No
R-HSA-211945	Phase I - Functionalization of compounds	Reactome	0.168	0.717221	0.755327	-0.0381062	No
GO:0097530	granulocyte migration	GOBP	-0.024	-0.0571734	-0.0191874	-0.037986	No
GO:0033014	tetrapyrrole biosynthetic process	GOBP	0.018	0	0.0379467	-0.0379467	No
R-HSA-1369062	ABC transporters in lipid homeostasis	Reactome	0.006	0	0.0379028	-0.0379028	No
GO:0048002	antigen processing and presentation of peptide antigen	GOBP	-0.001	-0.064095	-0.0263478	-0.0377472	No
KEGG_05142	Chagas disease (American trypanosomiasis)	KEGG	-0.001	-0.0373692	0	-0.0373692	No
GO:0000314	organellar small ribosomal subunit	GOCC	0.042	0	0.0372429	-0.0372429	No
GO:0005763	mitochondrial small ribosomal subunit	GOCC	0.042	0	0.0372429	-0.0372429	No
GO:1902600	hydrogen ion transmembrane transport	GOBP	0.024	0	0.0370564	-0.0370564	No
GO:0070555	response to interleukin-1	GOBP	-0.002	-0.0370542	0	-0.0370542	No
GO:0019884	antigen processing and presentation of exogenous antigen	GOBP	-0.005	-0.0620398	-0.025056	-0.0369838	No
GO:0000428	DNA-directed RNA polymerase complex	GOCC	0.009	-0.0368661	0	-0.0368661	No
GO:0070069	cytochrome complex	GOCC	0.038	0	0.0368532	-0.0368532	No
GO:0006085	acetyl-CoA biosynthetic process	GOBP	0.031	0.0362634	0.0730599	-0.0367965	No
GO:0006406	mRNA export from nucleus	GOBP	-0.02	-0.0954509	-0.0586631	-0.0367878	No
GO:0071427	mRNA-containing ribonucleoprotein complex export from nucleus	GOBP	-0.02	-0.0954509	-0.0586631	-0.0367878	No
GO:0006779	porphyrin-containing compound biosynthetic process	GOBP	0.017	0	0.0366369	-0.0366369	No
GO:0030880	RNA polymerase complex	GOCC	0.011	-0.0365901	0	-0.0365901	No
GO:0055029	nuclear DNA-directed RNA polymerase complex	GOCC	0.01	-0.0364924	0	-0.0364924	No
GO:0006399	tRNA metabolic process	GOBP	0.044	-0.0363433	0	-0.0363433	No
GO:0034340	response to type I interferon	GOBP	-0.028	-0.0266912	0.00961748	-0.0363087	No
R-HSA-5696398	Nucleotide Excision Repair	Reactome	0.009	-0.0359999	0	-0.0359999	No
GO:0006778	porphyrin-containing compound metabolic process	GOBP	0.015	0	0.0358201	-0.0358201	No
GO:0042590	antigen processing and presentation of exogenous peptide antigen via MHC class I	GOBP	-0.006	-0.0572205	-0.0216216	-0.0355988	No
R-HSA-1655829	Regulation of cholesterol biosynthesis by SREBP (SREBF)	Reactome	0.006	0	0.0351282	-0.0351282	No
R-HSA-913531	Interferon Signaling	Reactome	-0.003	-0.0343544	0.000579204	-0.0349336	No
R-HSA-6781827	Transcription-Coupled Nucleotide Excision Repair (TC-NER)	Reactome	0.012	-0.0347889	0	-0.0347889	No
GO:0060337	type I interferon signaling pathway	GOBP	-0.026	-0.0267871	0.00768423	-0.0344713	No
GO:0071357	cellular response to type I interferon	GOBP	-0.026	-0.0267871	0.00768423	-0.0344713	No
GO:0009084	glutamine family amino acid biosynthetic process	GOBP	0.011	0	0.0344453	-0.0344453	No
GO:0002227	innate immune response in mucosa	GOBP	-0.002	0	0.033515	-0.033515	No
GO:0016458	gene silencing	GOBP	-0.006	-0.0608696	-0.0274852	-0.0333844	No
GO:1901617	organic hydroxy compound biosynthetic process	GOBP	0.028	0.114143	0.147513	-0.0333697	No
GO:0098803	respiratory chain complex	GOCC	0.088	0.131994	0.165153	-0.0331595	No
R-HSA-180786	Extension of Telomeres	Reactome	0.035	-0.0328122	0	-0.0328122	No
GO:0019882	antigen processing and presentation	GOBP	-0.006	-0.0606434	-0.0278869	-0.0327565	No
GO:0030595	leukocyte chemotaxis	GOBP	-0.023	-0.0327274	0	-0.0327274	No
GO:0000732	strand displacement	GOBP	0.034	-0.0640691	-0.0321635	-0.0319055	No
R-HSA-5693554	Resolution of D-loop Structures through Synthesis-Dependent Strand Annealing (SDSA)	Reactome	0.034	-0.0640691	-0.0321635	-0.0319055	No
GO:0045940	positive regulation of steroid metabolic process	GOBP	0.008	0	0.0313791	-0.0313791	No
GO:0042775	mitochondrial ATP synthesis coupled electron transport	GOBP	0.088	0.109872	0.140786	-0.0309144	No
GO:0005681	spliceosomal complex	GOCC	-0.044	-0.0891176	-0.0588196	-0.030298	No
GO:0016072	rRNA metabolic process	GOBP	-0.11	-0.203972	-0.175304	-0.028668	No
GO:0000788	nuclear nucleosome	GOCC	-0.01	-0.0504675	-0.0220167	-0.0284508	No
GO:1903793	positive regulation of anion transport	GOBP	0.002	0	0.0284296	-0.0284296	No
GO:0051028	mRNA transport	GOBP	-0.022	-0.0466119	-0.0182795	-0.0283324	No
GO:0005657	replication fork	GOCC	0.037	-0.0457922	-0.0174601	-0.0283321	No
KEGG_05146	Amoebiasis	KEGG	-0.003	-0.0276391	0	-0.0276391	No
R-HSA-5689901	Metalloprotease DUBs	Reactome	-0.002	0	0.0274655	-0.0274655	No
GO:0031406	carboxylic acid binding	GOMF	0.003	0	0.0272315	-0.0272315	No
GO:0043177	organic acid binding	GOMF	0.003	0	0.0272315	-0.0272315	No
R-HSA-75876	Synthesis of very long-chain fatty acyl-CoAs	Reactome	0.004	0	0.0271775	-0.0271775	No
GO:0044815	DNA packaging complex	GOCC	-0.004	-0.0563869	-0.0293759	-0.027011	No
GO:0042119	neutrophil activation	GOBP	-0.002	-0.026842	0	-0.026842	No
GO:0002251	organ or tissue specific immune response	GOBP	-0.004	0	0.0266521	-0.0266521	No
GO:0002446	neutrophil mediated immunity	GOBP	0	-0.026625	0	-0.026625	No
GO:1902895	positive regulation of pri-miRNA transcription from RNA polymerase II promoter	GOBP	-0.004	-0.0266114	0	-0.0266114	No
GO:0036230	granulocyte activation	GOBP	0	-0.0265558	0	-0.0265558	No
GO:0098531	transcription factor activity, direct ligand regulated sequence-specific DNA binding	GOMF	0.002	0	0.0264859	-0.0264859	No
GO:0002385	mucosal immune response	GOBP	-0.002	0	0.0263862	-0.0263862	No
GO:0017004	cytochrome complex assembly	GOBP	0.029	0	0.0263752	-0.0263752	No
R-HSA-6798695	Neutrophil degranulation	Reactome	0.002	-0.0261581	0	-0.0261581	No
GO:0002444	myeloid leukocyte mediated immunity	GOBP	0	-0.026111	0	-0.026111	No
GO:0004129	cytochrome-c oxidase activity	GOMF	0.019	0	0.0259159	-0.0259159	No
GO:0015002	heme-copper terminal oxidase activity	GOMF	0.019	0	0.0259159	-0.0259159	No
GO:0016675	oxidoreductase activity, acting on a heme group of donors	GOMF	0.019	0	0.0259159	-0.0259159	No
GO:0016676	oxidoreductase activity, acting on a heme group of donors, oxygen as acceptor	GOMF	0.019	0	0.0259159	-0.0259159	No
GO:0043312	neutrophil degranulation	GOBP	0.001	-0.0258693	0	-0.0258693	No
GO:0043299	leukocyte degranulation	GOBP	-0.002	-0.0258377	0	-0.0258377	No
GO:0002283	neutrophil activation involved in immune response	GOBP	0.001	-0.0257862	0	-0.0257862	No
GO:0006091	generation of precursor metabolites and energy	GOBP	0.061	0.0409495	0.0665889	-0.0256394	No
GO:0090208	positive regulation of triglyceride metabolic process	GOBP	0.017	0	0.0254302	-0.0254302	No
GO:0002275	myeloid cell activation involved in immune response	GOBP	0.003	-0.0252985	0	-0.0252985	No
GO:0016209	antioxidant activity	GOMF	0.004	0.0431196	0.0682847	-0.0251651	No
GO:0046633	alpha-beta T cell proliferation	GOBP	-0.004	-0.0579813	-0.0329337	-0.0250476	No
GO:0045277	respiratory chain complex IV	GOCC	0.016	0	0.0250198	-0.0250198	No
GO:0015909	long-chain fatty acid transport	GOBP	0.004	0	0.024928	-0.024928	No
GO:0004879	nuclear receptor activity	GOMF	0.001	0	0.0248237	-0.0248237	No
KEGG_00270	Cysteine and methionine metabolism	KEGG	0.009	0.041062	0.0658494	-0.0247874	No
R-HSA-8936459	RUNX1 regulates genes involved in megakaryocyte differentiation and platelet function	Reactome	-0.023	-0.0554767	-0.0306975	-0.0247792	No
GO:0002274	myeloid leukocyte activation	GOBP	-0.005	-0.0245268	0	-0.0245268	No
GO:0035459	cargo loading into vesicle	GOBP	0.006	0	0.0245019	-0.0245019	No
R-HSA-977225	Amyloid fiber formation	Reactome	-0.017	0	0.0241432	-0.0241432	No
GO:0006818	hydrogen transport	GOBP	0.018	0	0.0240706	-0.0240706	No
R-HSA-2243919	Crosslinking of collagen fibrils	Reactome	-0.012	-0.0417729	-0.0182106	-0.0235623	No
GO:0018200	peptidyl-glutamic acid modification	GOBP	0.011	0	0.0235137	-0.0235137	No
GO:0000315	organellar large ribosomal subunit	GOCC	0.053	0.032134	0.0556065	-0.0234725	No
GO:0005762	mitochondrial large ribosomal subunit	GOCC	0.053	0.032134	0.0556065	-0.0234725	No
GO:0009156	ribonucleoside monophosphate biosynthetic process	GOBP	0.014	0	0.0234488	-0.0234488	No
GO:0051983	regulation of chromosome segregation	GOBP	0.002	-0.0819588	-0.0585574	-0.0234014	No
KEGG_04950	Maturity onset diabetes of the young	KEGG	0.013	0	0.0231827	-0.0231827	No
GO:0044786	cell cycle DNA replication	GOBP	0.034	-0.0764725	-0.0532913	-0.0231812	No
GO:0009201	ribonucleoside triphosphate biosynthetic process	GOBP	0.015	0	0.0231386	-0.0231386	No
R-HSA-5358346	Hedgehog ligand biogenesis	Reactome	-0.001	0	0.023107	-0.023107	No
GO:0042445	hormone metabolic process	GOBP	0.021	0.108458	0.13153	-0.0230723	No
GO:0002366	leukocyte activation involved in immune response	GOBP	-0.002	-0.0230229	0	-0.0230229	No
GO:0002263	cell activation involved in immune response	GOBP	-0.002	-0.022958	0	-0.022958	No
KEGG_00630	Glyoxylate and dicarboxylate metabolism	KEGG	0.136	0.586068	0.608984	-0.0229162	No
GO:1903047	mitotic cell cycle process	GOBP	0.016	-0.0679657	-0.0451428	-0.0228228	No
GO:0032373	positive regulation of sterol transport	GOBP	0.001	0	0.02281	-0.02281	No
GO:0032376	positive regulation of cholesterol transport	GOBP	0.001	0	0.02281	-0.02281	No
GO:0007005	mitochondrion organization	GOBP	0.013	0	0.0227907	-0.0227907	No
GO:0046890	regulation of lipid biosynthetic process	GOBP	0.007	0	0.0227735	-0.0227735	No
GO:0005975	carbohydrate metabolic process	GOBP	0.005	0	0.0227652	-0.0227652	No
GO:0009145	purine nucleoside triphosphate biosynthetic process	GOBP	0.015	0	0.022676	-0.022676	No
GO:0009206	purine ribonucleoside triphosphate biosynthetic process	GOBP	0.015	0	0.022676	-0.022676	No
GO:0009124	nucleoside monophosphate biosynthetic process	GOBP	0.015	0	0.0225177	-0.0225177	No
GO:0006303	double-strand break repair via nonhomologous end joining	GOBP	0.004	0	0.0223664	-0.0223664	No
GO:0046640	regulation of alpha-beta T cell proliferation	GOBP	-0.005	-0.0694121	-0.0470678	-0.0223443	No
GO:0006073	cellular glucan metabolic process	GOBP	0.008	0	0.0223253	-0.0223253	No
GO:0044042	glucan metabolic process	GOBP	0.008	0	0.0223253	-0.0223253	No
GO:0046470	phosphatidylcholine metabolic process	GOBP	0.005	0	0.0223137	-0.0223137	No
GO:0006063	uronic acid metabolic process	GOBP	0.182	0.813018	0.835243	-0.0222252	No
GO:0019585	glucuronate metabolic process	GOBP	0.182	0.813018	0.835243	-0.0222252	No
GO:0000959	mitochondrial RNA metabolic process	GOBP	0.021	0	0.0215889	-0.0215889	No
GO:0043624	cellular protein complex disassembly	GOBP	0.025	0	0.0215314	-0.0215314	No
GO:0006783	heme biosynthetic process	GOBP	0.019	0	0.0215273	-0.0215273	No
GO:0015020	glucuronosyltransferase activity	GOMF	0.028	0.104791	0.125986	-0.0211953	No
GO:0033865	nucleoside bisphosphate metabolic process	GOBP	0.006	0	0.0211162	-0.0211162	No
GO:0033875	ribonucleoside bisphosphate metabolic process	GOBP	0.006	0	0.0211162	-0.0211162	No
GO:0034032	purine nucleoside bisphosphate metabolic process	GOBP	0.006	0	0.0211162	-0.0211162	No
KEGG_02010	ABC transporters	KEGG	0.01	0	0.0210443	-0.0210443	No
GO:0042762	regulation of sulfur metabolic process	GOBP	0.009	0	0.0210053	-0.0210053	No
GO:0000278	mitotic cell cycle	GOBP	0.009	-0.0659705	-0.0449974	-0.0209731	No
R-HSA-5250941	Negative epigenetic regulation of rRNA expression	Reactome	-0.015	-0.052071	-0.0311505	-0.0209205	No
GO:0045923	positive regulation of fatty acid metabolic process	GOBP	0.013	0	0.0208769	-0.0208769	No
R-HSA-8982491	Glycogen metabolism	Reactome	0.011	0	0.0208097	-0.0208097	No
R-HSA-427413	NoRC negatively regulates rRNA expression	Reactome	-0.012	-0.0522466	-0.031455	-0.0207916	No
GO:0061041	regulation of wound healing	GOBP	0.006	0	0.0204557	-0.0204557	No
R-HSA-174178	APC/C:Cdh1 mediated degradation of Cdc20 and other APC/C:Cdh1 targeted proteins in late mitosis/early G1	Reactome	0.014	0	0.0203047	-0.0203047	No
GO:0016684	oxidoreductase activity, acting on peroxide as acceptor	GOMF	0.003	0	0.0202769	-0.0202769	No
R-HSA-72163	mRNA Splicing - Major Pathway	Reactome	-0.059	-0.119079	-0.0988102	-0.0202684	No
GO:0006123	mitochondrial electron transport, cytochrome c to oxygen	GOBP	0.026	0	0.0202469	-0.0202469	No
GO:0042168	heme metabolic process	GOBP	0.016	0	0.0202366	-0.0202366	No
R-HSA-72172	mRNA Splicing	Reactome	-0.055	-0.11952	-0.0994319	-0.0200879	No
R-HSA-70268	Pyruvate metabolism	Reactome	0.015	0	0.019998	-0.019998	No
GO:0002443	leukocyte mediated immunity	GOBP	0	-0.0199586	0	-0.0199586	No
GO:0031210	phosphatidylcholine binding	GOMF	0.007	0	0.0198334	-0.0198334	No
GO:0050997	quaternary ammonium group binding	GOMF	0.007	0	0.0198334	-0.0198334	No
GO:0004601	peroxidase activity	GOMF	0.001	0	0.0197067	-0.0197067	No
GO:0050661	NADP binding	GOMF	0.017	0.0598106	0.079471	-0.0196604	No
R-HSA-196807	Nicotinate metabolism	Reactome	0.001	0	0.0195532	-0.0195532	No
KEGG_00910	Nitrogen metabolism	KEGG	0.003	0	0.0195069	-0.0195069	No
GO:0032993	protein-DNA complex	GOCC	-0.001	0	0.0195019	-0.0195019	No
KEGG_04260	Cardiac muscle contraction	KEGG	0.005	0	0.0187928	-0.0187928	No
GO:0005689	U12-type spliceosomal complex	GOCC	-0.005	-0.045048	-0.0265117	-0.0185363	No
GO:0042398	cellular modified amino acid biosynthetic process	GOBP	0.013	0.115157	0.132922	-0.0177644	No
GO:0015908	fatty acid transport	GOBP	0.003	0	0.0173444	-0.0173444	No
GO:0015992	proton transport	GOBP	0.017	0	0.0164717	-0.0164717	No
R-HSA-2426168	Activation of gene expression by SREBF (SREBP)	Reactome	0.003	0	0.0162675	-0.0162675	No
R-HSA-211000	Gene Silencing by RNA	Reactome	-0.005	-0.0567829	-0.0409752	-0.0158077	No
GO:0098644	complex of collagen trimers	GOCC	-0.045	-0.0590897	-0.0434818	-0.0156079	No
GO:0045333	cellular respiration	GOBP	0.141	0.286501	0.301761	-0.0152606	No
GO:0097525	spliceosomal snRNP complex	GOCC	-0.04	-0.0922116	-0.0770683	-0.0151433	No
R-HSA-1474165	Reproduction	Reactome	-0.009	-0.0495012	-0.0348512	-0.0146499	No
GO:0005759	mitochondrial matrix	GOCC	0.221	0.591332	0.605825	-0.014493	No
GO:0034724	DNA replication-independent nucleosome organization	GOBP	0.022	-0.0523213	-0.0383937	-0.0139277	No
GO:0051289	protein homotetramerization	GOBP	0.016	0.111355	0.125243	-0.0138882	No
GO:0000819	sister chromatid segregation	GOBP	0.039	-0.157468	-0.143671	-0.0137969	No
GO:0016765	transferase activity, transferring alkyl or aryl (other than methyl) groups	GOMF	0.003	0	0.0136033	-0.0136033	No
GO:0030532	small nuclear ribonucleoprotein complex	GOCC	-0.032	-0.0930865	-0.079569	-0.0135175	No
R-HSA-427359	SIRT1 negatively regulates rRNA expression	Reactome	-0.02	-0.0496155	-0.0364028	-0.0132127	No
GO:0072678	T cell migration	GOBP	-0.025	-0.0319722	-0.0189465	-0.0130257	No
KEGG_03008	Ribosome biogenesis in eukaryotes	KEGG	-0.021	-0.0736003	-0.0608229	-0.0127774	No
GO:0035338	long-chain fatty-acyl-CoA biosynthetic process	GOBP	0.006	0	0.0125966	-0.0125966	No
GO:0006336	DNA replication-independent nucleosome assembly	GOBP	0.02	-0.0511502	-0.0385867	-0.0125635	No
GO:0046949	fatty-acyl-CoA biosynthetic process	GOBP	0.029	0	0.0125424	-0.0125424	No
R-HSA-4615885	SUMOylation of DNA replication proteins	Reactome	0.015	-0.0580236	-0.045679	-0.0123447	No
GO:0000779	condensed chromosome, centromeric region	GOCC	0.046	-0.143715	-0.131885	-0.0118302	No
GO:0035336	long-chain fatty-acyl-CoA metabolic process	GOBP	0.013	0	0.0108275	-0.0108275	No
GO:0044236	multicellular organism metabolic process	GOBP	-0.028	-0.0427878	-0.0321951	-0.0105927	No
GO:0002474	antigen processing and presentation of peptide antigen via MHC class I	GOBP	0.003	-0.0102504	0.000195009	-0.0104454	No
GO:0000183	chromatin silencing at rDNA	GOBP	-0.021	-0.0497995	-0.0398923	-0.00990718	No
GO:0098800	inner mitochondrial membrane protein complex	GOCC	0.088	0.131167	0.140656	-0.00948975	No
R-HSA-5619084	ABC transporter disorders	Reactome	0.007	0.0520039	0.0614655	-0.0094616	No
GO:0044455	mitochondrial membrane part	GOCC	0.09	0.1816	0.190767	-0.00916708	No
GO:0016701	oxidoreductase activity, acting on single donors with incorporation of molecular oxygen	GOMF	0.006	0.0339149	0.0421619	-0.00824702	No
GO:0004602	glutathione peroxidase activity	GOMF	0.011	0.0694515	0.0773459	-0.00789444	No
R-HSA-68875	Mitotic Prophase	Reactome	-0.004	-0.054339	-0.0466718	-0.00766721	No
KEGG_04672	Intestinal immune network for IgA production	KEGG	-0.045	-0.0649718	-0.0575806	-0.00739123	No
R-HSA-216083	Integrin cell surface interactions	Reactome	-0.05	-0.0710654	-0.0636865	-0.00737891	No
R-HSA-8939236	RUNX1 regulates transcription of genes involved in differentiation of HSCs	Reactome	-0.004	-0.0395334	-0.0324918	-0.00704154	No
KEGG_04640	Hematopoietic cell lineage	KEGG	-0.029	-0.00665203	0	-0.00665203	No
GO:0000387	spliceosomal snRNP assembly	GOBP	-0.012	-0.0506293	-0.0440916	-0.00653775	No
GO:1905368	peptidase complex	GOCC	0.005	0	0.00634463	-0.00634463	No
GO:0031491	nucleosome binding	GOMF	-0.003	-0.0478571	-0.0421328	-0.0057243	No
GO:0005686	U2 snRNP	GOCC	-0.012	-0.053206	-0.0475951	-0.0056109	No
GO:0006119	oxidative phosphorylation	GOBP	0.09	0.110786	0.11621	-0.00542367	No
GO:0045335	phagocytic vesicle	GOCC	-0.007	-0.0276494	-0.0222416	-0.00540775	No
GO:0071426	ribonucleoprotein complex export from nucleus	GOBP	-0.017	-0.0471799	-0.0420663	-0.00511365	No
GO:0098798	mitochondrial protein complex	GOCC	0.104	0.182896	0.187892	-0.00499555	No
GO:0071166	ribonucleoprotein complex localization	GOBP	-0.017	-0.0472884	-0.0426515	-0.00463687	No
GO:0031497	chromatin assembly	GOBP	-0.002	-0.0601512	-0.0555245	-0.0046267	No
GO:0048525	negative regulation of viral process	GOBP	-0.003	-0.0359321	-0.0313478	-0.00458431	No
GO:0045071	negative regulation of viral genome replication	GOBP	-0.001	-0.030789	-0.0262638	-0.00452523	No
R-HSA-381426	Regulation of Insulin-like Growth Factor (IGF) transport and uptake by Insulin-like Growth Factor Binding Proteins (IGFBPs)	Reactome	0.022	0.0757696	0.080132	-0.00436241	No
GO:0022618	ribonucleoprotein complex assembly	GOBP	-0.045	-0.0498297	-0.0462338	-0.00359593	No
GO:0000469	cleavage involved in rRNA processing	GOBP	-0.021	-0.0391118	-0.0356468	-0.00346492	No
GO:0006364	rRNA processing	GOBP	-0.119	-0.202118	-0.198853	-0.00326449	No
GO:0071826	ribonucleoprotein complex subunit organization	GOBP	-0.042	-0.0496826	-0.0464454	-0.00323722	No
R-HSA-69190	DNA strand elongation	Reactome	0.032	-0.123841	-0.12094	-0.00290149	No
R-HSA-8957275	Post-translational protein phosphorylation	Reactome	0.025	0.0724682	0.0751969	-0.00272868	No
GO:0002253	activation of immune response	GOBP	-0.016	-0.00241071	0	-0.00241071	No
GO:0001725	stress fiber	GOCC	-0.007	-0.0301372	-0.0279422	-0.00219503	No
GO:0097517	contractile actin filament bundle	GOCC	-0.007	-0.0301372	-0.0279422	-0.00219503	No
R-HSA-3214815	HDACs deacetylate histones	Reactome	-0.022	-0.0561813	-0.0542884	-0.00189282	No
R-HSA-68962	Activation of the pre-replicative complex	Reactome	0.04	-0.073577	-0.0718246	-0.00175244	No
KEGG_00040	Pentose and glucuronate interconversions	KEGG	0.191	0.780571	0.782023	-0.00145191	No
GO:0050778	positive regulation of immune response	GOBP	-0.018	-0.00129026	0	-0.00129026	No
GO:0006335	DNA replication-dependent nucleosome assembly	GOBP	-0.007	-0.0581645	-0.057889	-0.000275481	No
GO:0034723	DNA replication-dependent nucleosome organization	GOBP	-0.007	-0.0581645	-0.057889	-0.000275481	No
GO:0006260	DNA replication	GOBP	0.016	-0.0730871	-0.0728629	-0.000224225	No
GO:0000002	mitochondrial genome maintenance	GOBP	0	0	0	0	No
GO:0000003	reproduction	GOBP	0	0	0	0	No
GO:0000018	regulation of DNA recombination	GOBP	0.001	0	0	0	No
GO:0000027	ribosomal large subunit assembly	GOBP	-0.034	0	0	0	No
GO:0000041	transition metal ion transport	GOBP	0	0	0	0	No
GO:0000045	autophagosome assembly	GOBP	-0.002	0	0	0	No
GO:0000060	protein import into nucleus, translocation	GOBP	0	0	0	0	No
GO:0000076	DNA replication checkpoint	GOBP	0.003	0	0	0	No
GO:0000077	DNA damage checkpoint	GOBP	-0.001	0	0	0	No
GO:0000079	regulation of cyclin-dependent protein serine/threonine kinase activity	GOBP	0	0	0	0	No
GO:0000086	G2/M transition of mitotic cell cycle	GOBP	0.012	0	0	0	No
GO:0000122	negative regulation of transcription from RNA polymerase II promoter	GOBP	0	0	0	0	No
GO:0000165	MAPK cascade	GOBP	0	0	0	0	No
GO:0000186	activation of MAPKK activity	GOBP	0	0	0	0	No
GO:0000187	activation of MAPK activity	GOBP	0	0	0	0	No
GO:0000188	inactivation of MAPK activity	GOBP	-0.002	0	0	0	No
GO:0000209	protein polyubiquitination	GOBP	-0.005	0	0	0	No
GO:0000226	microtubule cytoskeleton organization	GOBP	0	0	0	0	No
GO:0000245	spliceosomal complex assembly	GOBP	-0.013	0	0	0	No
GO:0000266	mitochondrial fission	GOBP	0	0	0	0	No
GO:0000271	polysaccharide biosynthetic process	GOBP	0	0	0	0	No
GO:0000272	polysaccharide catabolic process	GOBP	0.003	0	0	0	No
GO:0000281	mitotic cytokinesis	GOBP	0.004	0	0	0	No
GO:0000288	nuclear-transcribed mRNA catabolic process, deadenylation-dependent decay	GOBP	-0.004	0	0	0	No
GO:0000289	nuclear-transcribed mRNA poly(A) tail shortening	GOBP	-0.004	0	0	0	No
GO:0000302	response to reactive oxygen species	GOBP	0	0	0	0	No
GO:0000305	response to oxygen radical	GOBP	0	0	0	0	No
GO:0000380	alternative mRNA splicing, via spliceosome	GOBP	-0.026	0	0	0	No
GO:0000381	regulation of alternative mRNA splicing, via spliceosome	GOBP	-0.006	0	0	0	No
GO:0000394	RNA splicing, via endonucleolytic cleavage and ligation	GOBP	0	0	0	0	No
GO:0000422	autophagy of mitochondrion	GOBP	0	0	0	0	No
GO:0000462	maturation of SSU-rRNA from tricistronic rRNA transcript (SSU-rRNA, 5.8S rRNA, LSU-rRNA)	GOBP	-0.024	0	0	0	No
GO:0000470	maturation of LSU-rRNA	GOBP	-0.006	0	0	0	No
GO:0000578	embryonic axis specification	GOBP	0	0	0	0	No
GO:0000715	nucleotide-excision repair, DNA damage recognition	GOBP	-0.002	0	0	0	No
GO:0000717	nucleotide-excision repair, DNA duplex unwinding	GOBP	-0.003	0	0	0	No
GO:0000724	double-strand break repair via homologous recombination	GOBP	0.012	0	0	0	No
GO:0000725	recombinational repair	GOBP	0.012	0	0	0	No
GO:0000726	non-recombinational repair	GOBP	0.004	0	0	0	No
GO:0000729	DNA double-strand break processing	GOBP	0.007	0	0	0	No
GO:0000731	DNA synthesis involved in DNA repair	GOBP	0.025	0	0	0	No
GO:0000737	DNA catabolic process, endonucleolytic	GOBP	0	0	0	0	No
GO:0000768	syncytium formation by plasma membrane fusion	GOBP	0	0	0	0	No
GO:0000902	cell morphogenesis	GOBP	0	0	0	0	No
GO:0000904	cell morphogenesis involved in differentiation	GOBP	0	0	0	0	No
GO:0000910	cytokinesis	GOBP	-0.002	0	0	0	No
GO:0000920	cell separation after cytokinesis	GOBP	0.007	0	0	0	No
GO:0001101	response to acid chemical	GOBP	0	0	0	0	No
GO:0001325	formation of extrachromosomal circular DNA	GOBP	0.008	0	0	0	No
GO:0001501	skeletal system development	GOBP	-0.004	0	0	0	No
GO:0001503	ossification	GOBP	0	0	0	0	No
GO:0001504	neurotransmitter uptake	GOBP	0	0	0	0	No
GO:0001505	regulation of neurotransmitter levels	GOBP	-0.003	0	0	0	No
GO:0001508	action potential	GOBP	-0.004	0	0	0	No
GO:0001510	RNA methylation	GOBP	0.017	0	0	0	No
GO:0001516	prostaglandin biosynthetic process	GOBP	0	0	0	0	No
GO:0001522	pseudouridine synthesis	GOBP	0.001	0	0	0	No
GO:0001525	angiogenesis	GOBP	-0.008	0	0	0	No
GO:0001539	cilium or flagellum-dependent cell motility	GOBP	0	0	0	0	No
GO:0001541	ovarian follicle development	GOBP	0	0	0	0	No
GO:0001558	regulation of cell growth	GOBP	0	0	0	0	No
GO:0001568	blood vessel development	GOBP	-0.008	0	0	0	No
GO:0001569	branching involved in blood vessel morphogenesis	GOBP	0	0	0	0	No
GO:0001570	vasculogenesis	GOBP	0	0	0	0	No
GO:0001578	microtubule bundle formation	GOBP	0.004	0	0	0	No
GO:0001580	detection of chemical stimulus involved in sensory perception of bitter taste	GOBP	0	0	0	0	No
GO:0001649	osteoblast differentiation	GOBP	0	0	0	0	No
GO:0001654	eye development	GOBP	0	0	0	0	No
GO:0001655	urogenital system development	GOBP	0	0	0	0	No
GO:0001656	metanephros development	GOBP	0	0	0	0	No
GO:0001657	ureteric bud development	GOBP	0	0	0	0	No
GO:0001658	branching involved in ureteric bud morphogenesis	GOBP	0	0	0	0	No
GO:0001659	temperature homeostasis	GOBP	0	0	0	0	No
GO:0001666	response to hypoxia	GOBP	-0.001	0	0	0	No
GO:0001667	ameboidal-type cell migration	GOBP	0	0	0	0	No
GO:0001678	cellular glucose homeostasis	GOBP	0	0	0	0	No
GO:0001701	in utero embryonic development	GOBP	0	0	0	0	No
GO:0001704	formation of primary germ layer	GOBP	-0.001	0	0	0	No
GO:0001706	endoderm formation	GOBP	-0.007	0	0	0	No
GO:0001707	mesoderm formation	GOBP	0	0	0	0	No
GO:0001708	cell fate specification	GOBP	0	0	0	0	No
GO:0001709	cell fate determination	GOBP	0	0	0	0	No
GO:0001736	establishment of planar polarity	GOBP	-0.007	0	0	0	No
GO:0001738	morphogenesis of a polarized epithelium	GOBP	-0.004	0	0	0	No
GO:0001754	eye photoreceptor cell differentiation	GOBP	0	0	0	0	No
GO:0001755	neural crest cell migration	GOBP	0	0	0	0	No
GO:0001756	somitogenesis	GOBP	0	0	0	0	No
GO:0001763	morphogenesis of a branching structure	GOBP	0	0	0	0	No
GO:0001764	neuron migration	GOBP	-0.002	0	0	0	No
GO:0001773	myeloid dendritic cell activation	GOBP	0	0	0	0	No
GO:0001816	cytokine production	GOBP	-0.004	0	0	0	No
GO:0001817	regulation of cytokine production	GOBP	-0.003	0	0	0	No
GO:0001818	negative regulation of cytokine production	GOBP	-0.001	0	0	0	No
GO:0001819	positive regulation of cytokine production	GOBP	-0.002	0	0	0	No
GO:0001822	kidney development	GOBP	0	0	0	0	No
GO:0001823	mesonephros development	GOBP	0	0	0	0	No
GO:0001836	release of cytochrome c from mitochondria	GOBP	0	0	0	0	No
GO:0001837	epithelial to mesenchymal transition	GOBP	-0.005	0	0	0	No
GO:0001838	embryonic epithelial tube formation	GOBP	0	0	0	0	No
GO:0001841	neural tube formation	GOBP	0	0	0	0	No
GO:0001843	neural tube closure	GOBP	0	0	0	0	No
GO:0001844	protein insertion into mitochondrial membrane involved in apoptotic signaling pathway	GOBP	0	0	0	0	No
GO:0001881	receptor recycling	GOBP	0	0	0	0	No
GO:0001885	endothelial cell development	GOBP	0	0	0	0	No
GO:0001889	liver development	GOBP	0	0	0	0	No
GO:0001890	placenta development	GOBP	0	0	0	0	No
GO:0001892	embryonic placenta development	GOBP	0	0	0	0	No
GO:0001894	tissue homeostasis	GOBP	0	0	0	0	No
GO:0001895	retina homeostasis	GOBP	0	0	0	0	No
GO:0001906	cell killing	GOBP	-0.006	0	0	0	No
GO:0001909	leukocyte mediated cytotoxicity	GOBP	-0.003	0	0	0	No
GO:0001910	regulation of leukocyte mediated cytotoxicity	GOBP	-0.003	0	0	0	No
GO:0001912	positive regulation of leukocyte mediated cytotoxicity	GOBP	-0.002	0	0	0	No
GO:0001913	T cell mediated cytotoxicity	GOBP	0	0	0	0	No
GO:0001914	regulation of T cell mediated cytotoxicity	GOBP	-0.001	0	0	0	No
GO:0001919	regulation of receptor recycling	GOBP	0	0	0	0	No
GO:0001933	negative regulation of protein phosphorylation	GOBP	0	0	0	0	No
GO:0001934	positive regulation of protein phosphorylation	GOBP	0	0	0	0	No
GO:0001935	endothelial cell proliferation	GOBP	0	0	0	0	No
GO:0001936	regulation of endothelial cell proliferation	GOBP	-0.002	0	0	0	No
GO:0001937	negative regulation of endothelial cell proliferation	GOBP	0	0	0	0	No
GO:0001938	positive regulation of endothelial cell proliferation	GOBP	0	0	0	0	No
GO:0001941	postsynaptic membrane organization	GOBP	-0.002	0	0	0	No
GO:0001942	hair follicle development	GOBP	0	0	0	0	No
GO:0001944	vasculature development	GOBP	-0.004	0	0	0	No
GO:0001945	lymph vessel development	GOBP	-0.003	0	0	0	No
GO:0001947	heart looping	GOBP	0	0	0	0	No
GO:0001952	regulation of cell-matrix adhesion	GOBP	0	0	0	0	No
GO:0001953	negative regulation of cell-matrix adhesion	GOBP	0	0	0	0	No
GO:0001954	positive regulation of cell-matrix adhesion	GOBP	0	0	0	0	No
GO:0001959	regulation of cytokine-mediated signaling pathway	GOBP	0	0	0	0	No
GO:0001960	negative regulation of cytokine-mediated signaling pathway	GOBP	0	0	0	0	No
GO:0001961	positive regulation of cytokine-mediated signaling pathway	GOBP	0.001	0	0	0	No
GO:0001963	synaptic transmission, dopaminergic	GOBP	0	0	0	0	No
GO:0001974	blood vessel remodeling	GOBP	0	0	0	0	No
GO:0002009	morphogenesis of an epithelium	GOBP	0	0	0	0	No
GO:0002011	morphogenesis of an epithelial sheet	GOBP	0	0	0	0	No
GO:0002026	regulation of the force of heart contraction	GOBP	0	0	0	0	No
GO:0002027	regulation of heart rate	GOBP	0	0	0	0	No
GO:0002028	regulation of sodium ion transport	GOBP	0	0	0	0	No
GO:0002040	sprouting angiogenesis	GOBP	-0.008	0	0	0	No
GO:0002042	cell migration involved in sprouting angiogenesis	GOBP	0.002	0	0	0	No
GO:0002062	chondrocyte differentiation	GOBP	0	0	0	0	No
GO:0002064	epithelial cell development	GOBP	0	0	0	0	No
GO:0002065	columnar/cuboidal epithelial cell differentiation	GOBP	0	0	0	0	No
GO:0002066	columnar/cuboidal epithelial cell development	GOBP	0	0	0	0	No
GO:0002067	glandular epithelial cell differentiation	GOBP	0	0	0	0	No
GO:0002088	lens development in camera-type eye	GOBP	0	0	0	0	No
GO:0002090	regulation of receptor internalization	GOBP	0	0	0	0	No
GO:0002092	positive regulation of receptor internalization	GOBP	0	0	0	0	No
GO:0002183	cytoplasmic translational initiation	GOBP	0	0	0	0	No
GO:0002200	somatic diversification of immune receptors	GOBP	-0.003	0	0	0	No
GO:0002204	somatic recombination of immunoglobulin genes involved in immune response	GOBP	0	0	0	0	No
GO:0002208	somatic diversification of immunoglobulins involved in immune response	GOBP	0	0	0	0	No
GO:0002218	activation of innate immune response	GOBP	-0.005	0	0	0	No
GO:0002220	innate immune response activating cell surface receptor signaling pathway	GOBP	-0.012	0	0	0	No
GO:0002221	pattern recognition receptor signaling pathway	GOBP	-0.006	0	0	0	No
GO:0002223	stimulatory C-type lectin receptor signaling pathway	GOBP	-0.011	0	0	0	No
GO:0002228	natural killer cell mediated immunity	GOBP	-0.002	0	0	0	No
GO:0002244	hematopoietic progenitor cell differentiation	GOBP	-0.008	0	0	0	No
GO:0002250	adaptive immune response	GOBP	-0.013	0	0	0	No
GO:0002262	myeloid cell homeostasis	GOBP	-0.003	0	0	0	No
GO:0002279	mast cell activation involved in immune response	GOBP	0	0	0	0	No
GO:0002285	lymphocyte activation involved in immune response	GOBP	-0.002	0	0	0	No
GO:0002286	T cell activation involved in immune response	GOBP	-0.009	0	0	0	No
GO:0002287	alpha-beta T cell activation involved in immune response	GOBP	-0.007	0	0	0	No
GO:0002292	T cell differentiation involved in immune response	GOBP	-0.006	0	0	0	No
GO:0002293	alpha-beta T cell differentiation involved in immune response	GOBP	-0.007	0	0	0	No
GO:0002294	CD4-positive, alpha-beta T cell differentiation involved in immune response	GOBP	-0.007	0	0	0	No
GO:0002312	B cell activation involved in immune response	GOBP	-0.001	0	0	0	No
GO:0002323	natural killer cell activation involved in immune response	GOBP	0	0	0	0	No
GO:0002347	response to tumor cell	GOBP	0	0	0	0	No
GO:0002360	T cell lineage commitment	GOBP	-0.004	0	0	0	No
GO:0002367	cytokine production involved in immune response	GOBP	-0.001	0	0	0	No
GO:0002369	T cell cytokine production	GOBP	0	0	0	0	No
GO:0002377	immunoglobulin production	GOBP	0	0	0	0	No
GO:0002381	immunoglobulin production involved in immunoglobulin mediated immune response	GOBP	0	0	0	0	No
GO:0002407	dendritic cell chemotaxis	GOBP	-0.012	0	0	0	No
GO:0002433	immune response-regulating cell surface receptor signaling pathway involved in phagocytosis	GOBP	-0.006	0	0	0	No
GO:0002440	production of molecular mediator of immune response	GOBP	0	0	0	0	No
GO:0002448	mast cell mediated immunity	GOBP	0.001	0	0	0	No
GO:0002449	lymphocyte mediated immunity	GOBP	-0.008	0	0	0	No
GO:0002456	T cell mediated immunity	GOBP	-0.003	0	0	0	No
GO:0002460	adaptive immune response based on somatic recombination of immune receptors built from immunoglobulin superfamily domains	GOBP	-0.012	0	0	0	No
GO:0002507	tolerance induction	GOBP	0	0	0	0	No
GO:0002520	immune system development	GOBP	0	0	0	0	No
GO:0002532	production of molecular mediator involved in inflammatory response	GOBP	0	0	0	0	No
GO:0002534	cytokine production involved in inflammatory response	GOBP	0	0	0	0	No
GO:0002548	monocyte chemotaxis	GOBP	-0.014	0	0	0	No
GO:0002562	somatic diversification of immune receptors via germline recombination within a single locus	GOBP	0	0	0	0	No
GO:0002573	myeloid leukocyte differentiation	GOBP	-0.001	0	0	0	No
GO:0002577	regulation of antigen processing and presentation	GOBP	-0.008	0	0	0	No
GO:0002637	regulation of immunoglobulin production	GOBP	0	0	0	0	No
GO:0002639	positive regulation of immunoglobulin production	GOBP	0	0	0	0	No
GO:0002675	positive regulation of acute inflammatory response	GOBP	-0.001	0	0	0	No
GO:0002683	negative regulation of immune system process	GOBP	-0.004	0	0	0	No
GO:0002684	positive regulation of immune system process	GOBP	-0.021	0	0	0	No
GO:0002685	regulation of leukocyte migration	GOBP	-0.011	0	0	0	No
GO:0002686	negative regulation of leukocyte migration	GOBP	0	0	0	0	No
GO:0002687	positive regulation of leukocyte migration	GOBP	-0.008	0	0	0	No
GO:0002688	regulation of leukocyte chemotaxis	GOBP	-0.011	0	0	0	No
GO:0002690	positive regulation of leukocyte chemotaxis	GOBP	-0.011	0	0	0	No
GO:0002691	regulation of cellular extravasation	GOBP	0	0	0	0	No
GO:0002695	negative regulation of leukocyte activation	GOBP	-0.008	0	0	0	No
GO:0002697	regulation of immune effector process	GOBP	-0.005	0	0	0	No
GO:0002698	negative regulation of immune effector process	GOBP	0	0	0	0	No
GO:0002699	positive regulation of immune effector process	GOBP	0	0	0	0	No
GO:0002700	regulation of production of molecular mediator of immune response	GOBP	0	0	0	0	No
GO:0002701	negative regulation of production of molecular mediator of immune response	GOBP	-0.001	0	0	0	No
GO:0002702	positive regulation of production of molecular mediator of immune response	GOBP	0	0	0	0	No
GO:0002703	regulation of leukocyte mediated immunity	GOBP	-0.01	0	0	0	No
GO:0002704	negative regulation of leukocyte mediated immunity	GOBP	-0.008	0	0	0	No
GO:0002705	positive regulation of leukocyte mediated immunity	GOBP	0	0	0	0	No
GO:0002706	regulation of lymphocyte mediated immunity	GOBP	0	0	0	0	No
GO:0002707	negative regulation of lymphocyte mediated immunity	GOBP	-0.004	0	0	0	No
GO:0002708	positive regulation of lymphocyte mediated immunity	GOBP	-0.001	0	0	0	No
GO:0002709	regulation of T cell mediated immunity	GOBP	-0.001	0	0	0	No
GO:0002711	positive regulation of T cell mediated immunity	GOBP	0	0	0	0	No
GO:0002712	regulation of B cell mediated immunity	GOBP	0	0	0	0	No
GO:0002715	regulation of natural killer cell mediated immunity	GOBP	-0.002	0	0	0	No
GO:0002717	positive regulation of natural killer cell mediated immunity	GOBP	0	0	0	0	No
GO:0002718	regulation of cytokine production involved in immune response	GOBP	0	0	0	0	No
GO:0002719	negative regulation of cytokine production involved in immune response	GOBP	0	0	0	0	No
GO:0002720	positive regulation of cytokine production involved in immune response	GOBP	0	0	0	0	No
GO:0002724	regulation of T cell cytokine production	GOBP	0	0	0	0	No
GO:0002753	cytoplasmic pattern recognition receptor signaling pathway	GOBP	-0.004	0	0	0	No
GO:0002756	MyD88-independent toll-like receptor signaling pathway	GOBP	-0.001	0	0	0	No
GO:0002758	innate immune response-activating signal transduction	GOBP	-0.005	0	0	0	No
GO:0002761	regulation of myeloid leukocyte differentiation	GOBP	-0.001	0	0	0	No
GO:0002762	negative regulation of myeloid leukocyte differentiation	GOBP	0	0	0	0	No
GO:0002763	positive regulation of myeloid leukocyte differentiation	GOBP	0	0	0	0	No
GO:0002790	peptide secretion	GOBP	0	0	0	0	No
GO:0002791	regulation of peptide secretion	GOBP	0	0	0	0	No
GO:0002792	negative regulation of peptide secretion	GOBP	0	0	0	0	No
GO:0002793	positive regulation of peptide secretion	GOBP	0	0	0	0	No
GO:0002819	regulation of adaptive immune response	GOBP	-0.002	0	0	0	No
GO:0002820	negative regulation of adaptive immune response	GOBP	0	0	0	0	No
GO:0002821	positive regulation of adaptive immune response	GOBP	0	0	0	0	No
GO:0002822	regulation of adaptive immune response based on somatic recombination of immune receptors built from immunoglobulin superfamily domains	GOBP	-0.002	0	0	0	No
GO:0002823	negative regulation of adaptive immune response based on somatic recombination of immune receptors built from immunoglobulin superfamily domains	GOBP	0	0	0	0	No
GO:0002824	positive regulation of adaptive immune response based on somatic recombination of immune receptors built from immunoglobulin superfamily domains	GOBP	0	0	0	0	No
GO:0002828	regulation of type 2 immune response	GOBP	0	0	0	0	No
GO:0002831	regulation of response to biotic stimulus	GOBP	0	0	0	0	No
GO:0002832	negative regulation of response to biotic stimulus	GOBP	0	0	0	0	No
GO:0002833	positive regulation of response to biotic stimulus	GOBP	0	0	0	0	No
GO:0002889	regulation of immunoglobulin mediated immune response	GOBP	0	0	0	0	No
GO:0003002	regionalization	GOBP	0	0	0	0	No
GO:0003006	developmental process involved in reproduction	GOBP	0	0	0	0	No
GO:0003007	heart morphogenesis	GOBP	-0.003	0	0	0	No
GO:0003012	muscle system process	GOBP	-0.007	0	0	0	No
GO:0003013	circulatory system process	GOBP	0.008	0	0	0	No
GO:0003015	heart process	GOBP	0	0	0	0	No
GO:0003018	vascular process in circulatory system	GOBP	0.001	0	0	0	No
GO:0003091	renal water homeostasis	GOBP	0	0	0	0	No
GO:0003143	embryonic heart tube morphogenesis	GOBP	0	0	0	0	No
GO:0003148	outflow tract septum morphogenesis	GOBP	0	0	0	0	No
GO:0003151	outflow tract morphogenesis	GOBP	0	0	0	0	No
GO:0003158	endothelium development	GOBP	-0.004	0	0	0	No
GO:0003170	heart valve development	GOBP	-0.003	0	0	0	No
GO:0003171	atrioventricular valve development	GOBP	-0.001	0	0	0	No
GO:0003179	heart valve morphogenesis	GOBP	-0.003	0	0	0	No
GO:0003181	atrioventricular valve morphogenesis	GOBP	0	0	0	0	No
GO:0003197	endocardial cushion development	GOBP	-0.002	0	0	0	No
GO:0003203	endocardial cushion morphogenesis	GOBP	-0.001	0	0	0	No
GO:0003205	cardiac chamber development	GOBP	-0.001	0	0	0	No
GO:0003206	cardiac chamber morphogenesis	GOBP	-0.001	0	0	0	No
GO:0003208	cardiac ventricle morphogenesis	GOBP	-0.001	0	0	0	No
GO:0003209	cardiac atrium morphogenesis	GOBP	0	0	0	0	No
GO:0003229	ventricular cardiac muscle tissue development	GOBP	-0.001	0	0	0	No
GO:0003230	cardiac atrium development	GOBP	0	0	0	0	No
GO:0003231	cardiac ventricle development	GOBP	-0.001	0	0	0	No
GO:0003254	regulation of membrane depolarization	GOBP	0	0	0	0	No
GO:0003272	endocardial cushion formation	GOBP	0	0	0	0	No
GO:0003279	cardiac septum development	GOBP	-0.003	0	0	0	No
GO:0003281	ventricular septum development	GOBP	-0.001	0	0	0	No
GO:0003283	atrial septum development	GOBP	0	0	0	0	No
GO:0003300	cardiac muscle hypertrophy	GOBP	0	0	0	0	No
GO:0003309	type B pancreatic cell differentiation	GOBP	0	0	0	0	No
GO:0003333	amino acid transmembrane transport	GOBP	0	0	0	0	No
GO:0003338	metanephros morphogenesis	GOBP	0	0	0	0	No
GO:0003341	cilium movement	GOBP	0.006	0	0	0	No
GO:0003407	neural retina development	GOBP	0	0	0	0	No
GO:0005976	polysaccharide metabolic process	GOBP	0	0	0	0	No
GO:0005978	glycogen biosynthetic process	GOBP	0.003	0	0	0	No
GO:0005979	regulation of glycogen biosynthetic process	GOBP	0	0	0	0	No
GO:0005980	glycogen catabolic process	GOBP	0.003	0	0	0	No
GO:0006007	glucose catabolic process	GOBP	-0.002	0	0	0	No
GO:0006022	aminoglycan metabolic process	GOBP	-0.001	0	0	0	No
GO:0006023	aminoglycan biosynthetic process	GOBP	-0.001	0	0	0	No
GO:0006024	glycosaminoglycan biosynthetic process	GOBP	-0.001	0	0	0	No
GO:0006026	aminoglycan catabolic process	GOBP	-0.004	0	0	0	No
GO:0006027	glycosaminoglycan catabolic process	GOBP	-0.001	0	0	0	No
GO:0006029	proteoglycan metabolic process	GOBP	-0.001	0	0	0	No
GO:0006040	amino sugar metabolic process	GOBP	0	0	0	0	No
GO:0006090	pyruvate metabolic process	GOBP	0.004	0	0	0	No
GO:0006096	glycolytic process	GOBP	-0.003	0	0	0	No
GO:0006098	pentose-phosphate shunt	GOBP	0.003	0	0	0	No
GO:0006109	regulation of carbohydrate metabolic process	GOBP	0	0	0	0	No
GO:0006110	regulation of glycolytic process	GOBP	0	0	0	0	No
GO:0006111	regulation of gluconeogenesis	GOBP	0	0	0	0	No
GO:0006140	regulation of nucleotide metabolic process	GOBP	0	0	0	0	No
GO:0006163	purine nucleotide metabolic process	GOBP	0.007	0	0	0	No
GO:0006164	purine nucleotide biosynthetic process	GOBP	0	0	0	0	No
GO:0006165	nucleoside diphosphate phosphorylation	GOBP	-0.002	0	0	0	No
GO:0006171	cAMP biosynthetic process	GOBP	0	0	0	0	No
GO:0006182	cGMP biosynthetic process	GOBP	0	0	0	0	No
GO:0006195	purine nucleotide catabolic process	GOBP	0	0	0	0	No
GO:0006213	pyrimidine nucleoside metabolic process	GOBP	0	0	0	0	No
GO:0006220	pyrimidine nucleotide metabolic process	GOBP	0.001	0	0	0	No
GO:0006259	DNA metabolic process	GOBP	0.01	0	0	0	No
GO:0006266	DNA ligation	GOBP	0.005	0	0	0	No
GO:0006271	DNA strand elongation involved in DNA replication	GOBP	0.032	0	0	0	No
GO:0006275	regulation of DNA replication	GOBP	0	0	0	0	No
GO:0006278	RNA-dependent DNA biosynthetic process	GOBP	-0.005	0	0	0	No
GO:0006281	DNA repair	GOBP	0.025	0	0	0	No
GO:0006282	regulation of DNA repair	GOBP	0.001	0	0	0	No
GO:0006283	transcription-coupled nucleotide-excision repair	GOBP	0.006	0	0	0	No
GO:0006284	base-excision repair	GOBP	0.002	0	0	0	No
GO:0006289	nucleotide-excision repair	GOBP	0.011	0	0	0	No
GO:0006293	nucleotide-excision repair, preincision complex stabilization	GOBP	0.004	0	0	0	No
GO:0006294	nucleotide-excision repair, preincision complex assembly	GOBP	-0.002	0	0	0	No
GO:0006295	nucleotide-excision repair, DNA incision, 3'-to lesion	GOBP	0.004	0	0	0	No
GO:0006296	nucleotide-excision repair, DNA incision, 5'-to lesion	GOBP	0.008	0	0	0	No
GO:0006297	nucleotide-excision repair, DNA gap filling	GOBP	0.009	0	0	0	No
GO:0006298	mismatch repair	GOBP	0.002	0	0	0	No
GO:0006301	postreplication repair	GOBP	0.002	0	0	0	No
GO:0006304	DNA modification	GOBP	0	0	0	0	No
GO:0006305	DNA alkylation	GOBP	0	0	0	0	No
GO:0006306	DNA methylation	GOBP	0	0	0	0	No
GO:0006308	DNA catabolic process	GOBP	0	0	0	0	No
GO:0006309	apoptotic DNA fragmentation	GOBP	0	0	0	0	No
GO:0006310	DNA recombination	GOBP	0.019	0	0	0	No
GO:0006312	mitotic recombination	GOBP	0.001	0	0	0	No
GO:0006325	chromatin organization	GOBP	-0.004	0	0	0	No
GO:0006346	methylation-dependent chromatin silencing	GOBP	0	0	0	0	No
GO:0006352	DNA-templated transcription, initiation	GOBP	0	0	0	0	No
GO:0006356	regulation of transcription from RNA polymerase I promoter	GOBP	0	0	0	0	No
GO:0006359	regulation of transcription from RNA polymerase III promoter	GOBP	0	0	0	0	No
GO:0006360	transcription from RNA polymerase I promoter	GOBP	0.002	0	0	0	No
GO:0006361	transcription initiation from RNA polymerase I promoter	GOBP	0.003	0	0	0	No
GO:0006362	transcription elongation from RNA polymerase I promoter	GOBP	0.002	0	0	0	No
GO:0006363	termination of RNA polymerase I transcription	GOBP	0.001	0	0	0	No
GO:0006367	transcription initiation from RNA polymerase II promoter	GOBP	0	0	0	0	No
GO:0006370	7-methylguanosine mRNA capping	GOBP	0	0	0	0	No
GO:0006376	mRNA splice site selection	GOBP	-0.017	0	0	0	No
GO:0006378	mRNA polyadenylation	GOBP	-0.001	0	0	0	No
GO:0006379	mRNA cleavage	GOBP	0	0	0	0	No
GO:0006383	transcription from RNA polymerase III promoter	GOBP	0	0	0	0	No
GO:0006400	tRNA modification	GOBP	0.02	0	0	0	No
GO:0006417	regulation of translation	GOBP	-0.002	0	0	0	No
GO:0006418	tRNA aminoacylation for protein translation	GOBP	0.023	0	0	0	No
GO:0006446	regulation of translational initiation	GOBP	-0.004	0	0	0	No
GO:0006457	protein folding	GOBP	-0.003	0	0	0	No
GO:0006458	'de novo' protein folding	GOBP	0.001	0	0	0	No
GO:0006469	negative regulation of protein kinase activity	GOBP	0	0	0	0	No
GO:0006470	protein dephosphorylation	GOBP	0	0	0	0	No
GO:0006471	protein ADP-ribosylation	GOBP	0	0	0	0	No
GO:0006474	N-terminal protein amino acid acetylation	GOBP	0	0	0	0	No
GO:0006476	protein deacetylation	GOBP	0	0	0	0	No
GO:0006479	protein methylation	GOBP	-0.005	0	0	0	No
GO:0006482	protein demethylation	GOBP	-0.001	0	0	0	No
GO:0006486	protein glycosylation	GOBP	0	0	0	0	No
GO:0006487	protein N-linked glycosylation	GOBP	0	0	0	0	No
GO:0006488	dolichol-linked oligosaccharide biosynthetic process	GOBP	0.01	0	0	0	No
GO:0006490	oligosaccharide-lipid intermediate biosynthetic process	GOBP	0.013	0	0	0	No
GO:0006491	N-glycan processing	GOBP	0	0	0	0	No
GO:0006493	protein O-linked glycosylation	GOBP	0	0	0	0	No
GO:0006497	protein lipidation	GOBP	0	0	0	0	No
GO:0006501	C-terminal protein lipidation	GOBP	0	0	0	0	No
GO:0006505	GPI anchor metabolic process	GOBP	0.004	0	0	0	No
GO:0006506	GPI anchor biosynthetic process	GOBP	0.004	0	0	0	No
GO:0006509	membrane protein ectodomain proteolysis	GOBP	0	0	0	0	No
GO:0006511	ubiquitin-dependent protein catabolic process	GOBP	-0.007	0	0	0	No
GO:0006513	protein monoubiquitination	GOBP	-0.004	0	0	0	No
GO:0006515	protein quality control for misfolded or incompletely synthesized proteins	GOBP	0	0	0	0	No
GO:0006516	glycoprotein catabolic process	GOBP	0	0	0	0	No
GO:0006517	protein deglycosylation	GOBP	0.002	0	0	0	No
GO:0006518	peptide metabolic process	GOBP	-0.007	0	0	0	No
GO:0006584	catecholamine metabolic process	GOBP	0	0	0	0	No
GO:0006595	polyamine metabolic process	GOBP	0	0	0	0	No
GO:0006605	protein targeting	GOBP	-0.013	0	0	0	No
GO:0006606	protein import into nucleus	GOBP	0	0	0	0	No
GO:0006607	NLS-bearing protein import into nucleus	GOBP	-0.002	0	0	0	No
GO:0006622	protein targeting to lysosome	GOBP	0.002	0	0	0	No
GO:0006623	protein targeting to vacuole	GOBP	0	0	0	0	No
GO:0006625	protein targeting to peroxisome	GOBP	0.005	0	0	0	No
GO:0006626	protein targeting to mitochondrion	GOBP	0	0	0	0	No
GO:0006636	unsaturated fatty acid biosynthetic process	GOBP	0	0	0	0	No
GO:0006643	membrane lipid metabolic process	GOBP	0.002	0	0	0	No
GO:0006644	phospholipid metabolic process	GOBP	0	0	0	0	No
GO:0006650	glycerophospholipid metabolic process	GOBP	0	0	0	0	No
GO:0006654	phosphatidic acid biosynthetic process	GOBP	0	0	0	0	No
GO:0006656	phosphatidylcholine biosynthetic process	GOBP	0	0	0	0	No
GO:0006658	phosphatidylserine metabolic process	GOBP	0	0	0	0	No
GO:0006661	phosphatidylinositol biosynthetic process	GOBP	0	0	0	0	No
GO:0006664	glycolipid metabolic process	GOBP	0.002	0	0	0	No
GO:0006665	sphingolipid metabolic process	GOBP	0	0	0	0	No
GO:0006672	ceramide metabolic process	GOBP	0	0	0	0	No
GO:0006687	glycosphingolipid metabolic process	GOBP	0.001	0	0	0	No
GO:0006688	glycosphingolipid biosynthetic process	GOBP	-0.002	0	0	0	No
GO:0006692	prostanoid metabolic process	GOBP	0	0	0	0	No
GO:0006693	prostaglandin metabolic process	GOBP	0	0	0	0	No
GO:0006700	C21-steroid hormone biosynthetic process	GOBP	0	0	0	0	No
GO:0006704	glucocorticoid biosynthetic process	GOBP	0	0	0	0	No
GO:0006733	oxidoreduction coenzyme metabolic process	GOBP	0.006	0	0	0	No
GO:0006734	NADH metabolic process	GOBP	0	0	0	0	No
GO:0006739	NADP metabolic process	GOBP	0.008	0	0	0	No
GO:0006753	nucleoside phosphate metabolic process	GOBP	0.007	0	0	0	No
GO:0006757	ATP generation from ADP	GOBP	-0.004	0	0	0	No
GO:0006775	fat-soluble vitamin metabolic process	GOBP	0.001	0	0	0	No
GO:0006801	superoxide metabolic process	GOBP	0	0	0	0	No
GO:0006809	nitric oxide biosynthetic process	GOBP	0	0	0	0	No
GO:0006812	cation transport	GOBP	0	0	0	0	No
GO:0006813	potassium ion transport	GOBP	0	0	0	0	No
GO:0006814	sodium ion transport	GOBP	0	0	0	0	No
GO:0006816	calcium ion transport	GOBP	0	0	0	0	No
GO:0006821	chloride transport	GOBP	0.006	0	0	0	No
GO:0006826	iron ion transport	GOBP	0	0	0	0	No
GO:0006829	zinc II ion transport	GOBP	0	0	0	0	No
GO:0006833	water transport	GOBP	0	0	0	0	No
GO:0006835	dicarboxylic acid transport	GOBP	0	0	0	0	No
GO:0006836	neurotransmitter transport	GOBP	-0.005	0	0	0	No
GO:0006839	mitochondrial transport	GOBP	0.009	0	0	0	No
GO:0006851	mitochondrial calcium ion transmembrane transport	GOBP	0.002	0	0	0	No
GO:0006865	amino acid transport	GOBP	0	0	0	0	No
GO:0006873	cellular ion homeostasis	GOBP	0	0	0	0	No
GO:0006874	cellular calcium ion homeostasis	GOBP	0	0	0	0	No
GO:0006875	cellular metal ion homeostasis	GOBP	0	0	0	0	No
GO:0006879	cellular iron ion homeostasis	GOBP	-0.001	0	0	0	No
GO:0006885	regulation of pH	GOBP	0.001	0	0	0	No
GO:0006886	intracellular protein transport	GOBP	-0.004	0	0	0	No
GO:0006887	exocytosis	GOBP	-0.002	0	0	0	No
GO:0006888	ER to Golgi vesicle-mediated transport	GOBP	0.008	0	0	0	No
GO:0006890	retrograde vesicle-mediated transport, Golgi to ER	GOBP	0.009	0	0	0	No
GO:0006891	intra-Golgi vesicle-mediated transport	GOBP	0	0	0	0	No
GO:0006892	post-Golgi vesicle-mediated transport	GOBP	0.005	0	0	0	No
GO:0006893	Golgi to plasma membrane transport	GOBP	0	0	0	0	No
GO:0006895	Golgi to endosome transport	GOBP	0.004	0	0	0	No
GO:0006897	endocytosis	GOBP	0	0	0	0	No
GO:0006898	receptor-mediated endocytosis	GOBP	0	0	0	0	No
GO:0006900	vesicle budding from membrane	GOBP	0.005	0	0	0	No
GO:0006901	vesicle coating	GOBP	0.003	0	0	0	No
GO:0006903	vesicle targeting	GOBP	0.002	0	0	0	No
GO:0006904	vesicle docking involved in exocytosis	GOBP	0	0	0	0	No
GO:0006906	vesicle fusion	GOBP	0	0	0	0	No
GO:0006907	pinocytosis	GOBP	0	0	0	0	No
GO:0006909	phagocytosis	GOBP	-0.003	0	0	0	No
GO:0006911	phagocytosis, engulfment	GOBP	-0.001	0	0	0	No
GO:0006913	nucleocytoplasmic transport	GOBP	-0.003	0	0	0	No
GO:0006914	autophagy	GOBP	-0.004	0	0	0	No
GO:0006919	activation of cysteine-type endopeptidase activity involved in apoptotic process	GOBP	0	0	0	0	No
GO:0006921	cellular component disassembly involved in execution phase of apoptosis	GOBP	0	0	0	0	No
GO:0006929	substrate-dependent cell migration	GOBP	0	0	0	0	No
GO:0006935	chemotaxis	GOBP	-0.003	0	0	0	No
GO:0006936	muscle contraction	GOBP	-0.007	0	0	0	No
GO:0006937	regulation of muscle contraction	GOBP	0	0	0	0	No
GO:0006939	smooth muscle contraction	GOBP	-0.002	0	0	0	No
GO:0006940	regulation of smooth muscle contraction	GOBP	0	0	0	0	No
GO:0006941	striated muscle contraction	GOBP	-0.003	0	0	0	No
GO:0006942	regulation of striated muscle contraction	GOBP	0	0	0	0	No
GO:0006949	syncytium formation	GOBP	0	0	0	0	No
GO:0006953	acute-phase response	GOBP	0.007	0	0	0	No
GO:0006970	response to osmotic stress	GOBP	0	0	0	0	No
GO:0006974	cellular response to DNA damage stimulus	GOBP	0.008	0	0	0	No
GO:0006977	DNA damage response, signal transduction by p53 class mediator resulting in cell cycle arrest	GOBP	-0.002	0	0	0	No
GO:0006978	DNA damage response, signal transduction by p53 class mediator resulting in transcription of p21 class mediator	GOBP	0	0	0	0	No
GO:0006979	response to oxidative stress	GOBP	0	0	0	0	No
GO:0006984	ER-nucleus signaling pathway	GOBP	-0.001	0	0	0	No
GO:0006986	response to unfolded protein	GOBP	-0.003	0	0	0	No
GO:0006997	nucleus organization	GOBP	-0.004	0	0	0	No
GO:0006998	nuclear envelope organization	GOBP	-0.004	0	0	0	No
GO:0006999	nuclear pore organization	GOBP	0.005	0	0	0	No
GO:0007004	telomere maintenance via telomerase	GOBP	-0.005	0	0	0	No
GO:0007006	mitochondrial membrane organization	GOBP	0.011	0	0	0	No
GO:0007009	plasma membrane organization	GOBP	0	0	0	0	No
GO:0007010	cytoskeleton organization	GOBP	0	0	0	0	No
GO:0007015	actin filament organization	GOBP	0	0	0	0	No
GO:0007017	microtubule-based process	GOBP	0	0	0	0	No
GO:0007018	microtubule-based movement	GOBP	0.009	0	0	0	No
GO:0007019	microtubule depolymerization	GOBP	0	0	0	0	No
GO:0007020	microtubule nucleation	GOBP	0	0	0	0	No
GO:0007029	endoplasmic reticulum organization	GOBP	0.001	0	0	0	No
GO:0007030	Golgi organization	GOBP	-0.002	0	0	0	No
GO:0007032	endosome organization	GOBP	0.002	0	0	0	No
GO:0007033	vacuole organization	GOBP	-0.002	0	0	0	No
GO:0007034	vacuolar transport	GOBP	0.001	0	0	0	No
GO:0007035	vacuolar acidification	GOBP	0.001	0	0	0	No
GO:0007040	lysosome organization	GOBP	0	0	0	0	No
GO:0007041	lysosomal transport	GOBP	0.001	0	0	0	No
GO:0007043	cell-cell junction assembly	GOBP	0	0	0	0	No
GO:0007044	cell-substrate junction assembly	GOBP	-0.002	0	0	0	No
GO:0007045	cell-substrate adherens junction assembly	GOBP	-0.002	0	0	0	No
GO:0007050	cell cycle arrest	GOBP	0	0	0	0	No
GO:0007064	mitotic sister chromatid cohesion	GOBP	-0.003	0	0	0	No
GO:0007088	regulation of mitotic nuclear division	GOBP	0.001	0	0	0	No
GO:0007098	centrosome cycle	GOBP	0.004	0	0	0	No
GO:0007099	centriole replication	GOBP	0.004	0	0	0	No
GO:0007100	mitotic centrosome separation	GOBP	0	0	0	0	No
GO:0007127	meiosis I	GOBP	0.002	0	0	0	No
GO:0007129	synapsis	GOBP	0.005	0	0	0	No
GO:0007131	reciprocal meiotic recombination	GOBP	0.002	0	0	0	No
GO:0007140	male meiotic nuclear division	GOBP	0	0	0	0	No
GO:0007155	cell adhesion	GOBP	0	0	0	0	No
GO:0007156	homophilic cell adhesion via plasma membrane adhesion molecules	GOBP	0	0	0	0	No
GO:0007157	heterophilic cell-cell adhesion via plasma membrane cell adhesion molecules	GOBP	0	0	0	0	No
GO:0007160	cell-matrix adhesion	GOBP	0	0	0	0	No
GO:0007162	negative regulation of cell adhesion	GOBP	0	0	0	0	No
GO:0007163	establishment or maintenance of cell polarity	GOBP	0	0	0	0	No
GO:0007164	establishment of tissue polarity	GOBP	-0.007	0	0	0	No
GO:0007167	enzyme linked receptor protein signaling pathway	GOBP	0	0	0	0	No
GO:0007169	transmembrane receptor protein tyrosine kinase signaling pathway	GOBP	0	0	0	0	No
GO:0007173	epidermal growth factor receptor signaling pathway	GOBP	0	0	0	0	No
GO:0007176	regulation of epidermal growth factor-activated receptor activity	GOBP	-0.001	0	0	0	No
GO:0007178	transmembrane receptor protein serine/threonine kinase signaling pathway	GOBP	0	0	0	0	No
GO:0007179	transforming growth factor beta receptor signaling pathway	GOBP	0	0	0	0	No
GO:0007184	SMAD protein import into nucleus	GOBP	0	0	0	0	No
GO:0007187	G-protein coupled receptor signaling pathway, coupled to cyclic nucleotide second messenger	GOBP	-0.004	0	0	0	No
GO:0007188	adenylate cyclase-modulating G-protein coupled receptor signaling pathway	GOBP	0	0	0	0	No
GO:0007189	adenylate cyclase-activating G-protein coupled receptor signaling pathway	GOBP	0	0	0	0	No
GO:0007190	activation of adenylate cyclase activity	GOBP	0	0	0	0	No
GO:0007193	adenylate cyclase-inhibiting G-protein coupled receptor signaling pathway	GOBP	0	0	0	0	No
GO:0007194	negative regulation of adenylate cyclase activity	GOBP	0	0	0	0	No
GO:0007200	phospholipase C-activating G-protein coupled receptor signaling pathway	GOBP	0	0	0	0	No
GO:0007202	activation of phospholipase C activity	GOBP	0	0	0	0	No
GO:0007204	positive regulation of cytosolic calcium ion concentration	GOBP	-0.001	0	0	0	No
GO:0007212	dopamine receptor signaling pathway	GOBP	0	0	0	0	No
GO:0007213	G-protein coupled acetylcholine receptor signaling pathway	GOBP	0	0	0	0	No
GO:0007215	glutamate receptor signaling pathway	GOBP	-0.013	0	0	0	No
GO:0007218	neuropeptide signaling pathway	GOBP	0.005	0	0	0	No
GO:0007219	Notch signaling pathway	GOBP	0	0	0	0	No
GO:0007220	Notch receptor processing	GOBP	0	0	0	0	No
GO:0007223	Wnt signaling pathway, calcium modulating pathway	GOBP	0	0	0	0	No
GO:0007224	smoothened signaling pathway	GOBP	0.001	0	0	0	No
GO:0007229	integrin-mediated signaling pathway	GOBP	-0.004	0	0	0	No
GO:0007249	I-kappaB kinase/NF-kappaB signaling	GOBP	-0.002	0	0	0	No
GO:0007254	JNK cascade	GOBP	0	0	0	0	No
GO:0007257	activation of JUN kinase activity	GOBP	0	0	0	0	No
GO:0007259	JAK-STAT cascade	GOBP	0	0	0	0	No
GO:0007260	tyrosine phosphorylation of STAT protein	GOBP	0	0	0	0	No
GO:0007263	nitric oxide mediated signal transduction	GOBP	0	0	0	0	No
GO:0007264	small GTPase mediated signal transduction	GOBP	0	0	0	0	No
GO:0007265	Ras protein signal transduction	GOBP	0	0	0	0	No
GO:0007266	Rho protein signal transduction	GOBP	0	0	0	0	No
GO:0007269	neurotransmitter secretion	GOBP	-0.003	0	0	0	No
GO:0007271	synaptic transmission, cholinergic	GOBP	0	0	0	0	No
GO:0007272	ensheathment of neurons	GOBP	0	0	0	0	No
GO:0007274	neuromuscular synaptic transmission	GOBP	0	0	0	0	No
GO:0007276	gamete generation	GOBP	0	0	0	0	No
GO:0007281	germ cell development	GOBP	0	0	0	0	No
GO:0007283	spermatogenesis	GOBP	0	0	0	0	No
GO:0007286	spermatid development	GOBP	0	0	0	0	No
GO:0007292	female gamete generation	GOBP	0	0	0	0	No
GO:0007338	single fertilization	GOBP	0	0	0	0	No
GO:0007339	binding of sperm to zona pellucida	GOBP	0	0	0	0	No
GO:0007340	acrosome reaction	GOBP	0	0	0	0	No
GO:0007346	regulation of mitotic cell cycle	GOBP	0.002	0	0	0	No
GO:0007368	determination of left/right symmetry	GOBP	0	0	0	0	No
GO:0007369	gastrulation	GOBP	-0.001	0	0	0	No
GO:0007389	pattern specification process	GOBP	0	0	0	0	No
GO:0007405	neuroblast proliferation	GOBP	0	0	0	0	No
GO:0007409	axonogenesis	GOBP	-0.003	0	0	0	No
GO:0007411	axon guidance	GOBP	-0.006	0	0	0	No
GO:0007416	synapse assembly	GOBP	-0.001	0	0	0	No
GO:0007417	central nervous system development	GOBP	0	0	0	0	No
GO:0007420	brain development	GOBP	0	0	0	0	No
GO:0007422	peripheral nervous system development	GOBP	0	0	0	0	No
GO:0007423	sensory organ development	GOBP	0	0	0	0	No
GO:0007492	endoderm development	GOBP	-0.006	0	0	0	No
GO:0007498	mesoderm development	GOBP	0	0	0	0	No
GO:0007507	heart development	GOBP	-0.001	0	0	0	No
GO:0007517	muscle organ development	GOBP	-0.005	0	0	0	No
GO:0007519	skeletal muscle tissue development	GOBP	-0.004	0	0	0	No
GO:0007520	myoblast fusion	GOBP	-0.001	0	0	0	No
GO:0007528	neuromuscular junction development	GOBP	0	0	0	0	No
GO:0007548	sex differentiation	GOBP	0	0	0	0	No
GO:0007565	female pregnancy	GOBP	0	0	0	0	No
GO:0007566	embryo implantation	GOBP	0	0	0	0	No
GO:0007568	aging	GOBP	0	0	0	0	No
GO:0007569	cell aging	GOBP	0	0	0	0	No
GO:0007584	response to nutrient	GOBP	0	0	0	0	No
GO:0007585	respiratory gaseous exchange	GOBP	0	0	0	0	No
GO:0007586	digestion	GOBP	0.022	0	0	0	No
GO:0007588	excretion	GOBP	0.002	0	0	0	No
GO:0007589	body fluid secretion	GOBP	0	0	0	0	No
GO:0007596	blood coagulation	GOBP	0	0	0	0	No
GO:0007599	hemostasis	GOBP	-0.002	0	0	0	No
GO:0007600	sensory perception	GOBP	0.008	0	0	0	No
GO:0007601	visual perception	GOBP	0	0	0	0	No
GO:0007602	phototransduction	GOBP	-0.006	0	0	0	No
GO:0007603	phototransduction, visible light	GOBP	-0.006	0	0	0	No
GO:0007605	sensory perception of sound	GOBP	0.007	0	0	0	No
GO:0007606	sensory perception of chemical stimulus	GOBP	0.005	0	0	0	No
GO:0007608	sensory perception of smell	GOBP	0.007	0	0	0	No
GO:0007610	behavior	GOBP	0	0	0	0	No
GO:0007611	learning or memory	GOBP	-0.007	0	0	0	No
GO:0007612	learning	GOBP	-0.007	0	0	0	No
GO:0007613	memory	GOBP	0	0	0	0	No
GO:0007616	long-term memory	GOBP	0	0	0	0	No
GO:0007622	rhythmic behavior	GOBP	0	0	0	0	No
GO:0007623	circadian rhythm	GOBP	-0.003	0	0	0	No
GO:0007626	locomotory behavior	GOBP	0	0	0	0	No
GO:0007631	feeding behavior	GOBP	0	0	0	0	No
GO:0008015	blood circulation	GOBP	0.008	0	0	0	No
GO:0008016	regulation of heart contraction	GOBP	0	0	0	0	No
GO:0008033	tRNA processing	GOBP	0.031	0	0	0	No
GO:0008037	cell recognition	GOBP	0	0	0	0	No
GO:0008038	neuron recognition	GOBP	-0.001	0	0	0	No
GO:0008053	mitochondrial fusion	GOBP	0	0	0	0	No
GO:0008064	regulation of actin polymerization or depolymerization	GOBP	0	0	0	0	No
GO:0008088	axo-dendritic transport	GOBP	0	0	0	0	No
GO:0008089	anterograde axonal transport	GOBP	0	0	0	0	No
GO:0008154	actin polymerization or depolymerization	GOBP	0	0	0	0	No
GO:0008156	negative regulation of DNA replication	GOBP	0	0	0	0	No
GO:0008207	C21-steroid hormone metabolic process	GOBP	0	0	0	0	No
GO:0008211	glucocorticoid metabolic process	GOBP	0	0	0	0	No
GO:0008213	protein alkylation	GOBP	-0.005	0	0	0	No
GO:0008214	protein dealkylation	GOBP	-0.001	0	0	0	No
GO:0008277	regulation of G-protein coupled receptor protein signaling pathway	GOBP	0	0	0	0	No
GO:0008284	positive regulation of cell proliferation	GOBP	0	0	0	0	No
GO:0008285	negative regulation of cell proliferation	GOBP	0	0	0	0	No
GO:0008286	insulin receptor signaling pathway	GOBP	0	0	0	0	No
GO:0008333	endosome to lysosome transport	GOBP	0.001	0	0	0	No
GO:0008334	histone mRNA metabolic process	GOBP	0	0	0	0	No
GO:0008347	glial cell migration	GOBP	0	0	0	0	No
GO:0008360	regulation of cell shape	GOBP	0	0	0	0	No
GO:0008361	regulation of cell size	GOBP	0	0	0	0	No
GO:0008366	axon ensheathment	GOBP	0	0	0	0	No
GO:0008406	gonad development	GOBP	0	0	0	0	No
GO:0008535	respiratory chain complex IV assembly	GOBP	0.016	0	0	0	No
GO:0008543	fibroblast growth factor receptor signaling pathway	GOBP	0	0	0	0	No
GO:0008544	epidermis development	GOBP	0	0	0	0	No
GO:0008584	male gonad development	GOBP	0	0	0	0	No
GO:0008585	female gonad development	GOBP	0	0	0	0	No
GO:0008589	regulation of smoothened signaling pathway	GOBP	0	0	0	0	No
GO:0008593	regulation of Notch signaling pathway	GOBP	0	0	0	0	No
GO:0008610	lipid biosynthetic process	GOBP	0.003	0	0	0	No
GO:0008625	extrinsic apoptotic signaling pathway via death domain receptors	GOBP	-0.004	0	0	0	No
GO:0008630	intrinsic apoptotic signaling pathway in response to DNA damage	GOBP	0	0	0	0	No
GO:0008631	intrinsic apoptotic signaling pathway in response to oxidative stress	GOBP	0	0	0	0	No
GO:0008637	apoptotic mitochondrial changes	GOBP	0.001	0	0	0	No
GO:0008643	carbohydrate transport	GOBP	0	0	0	0	No
GO:0008645	hexose transport	GOBP	0	0	0	0	No
GO:0008654	phospholipid biosynthetic process	GOBP	0.002	0	0	0	No
GO:0009100	glycoprotein metabolic process	GOBP	0	0	0	0	No
GO:0009101	glycoprotein biosynthetic process	GOBP	0	0	0	0	No
GO:0009116	nucleoside metabolic process	GOBP	0	0	0	0	No
GO:0009117	nucleotide metabolic process	GOBP	0.005	0	0	0	No
GO:0009119	ribonucleoside metabolic process	GOBP	-0.003	0	0	0	No
GO:0009127	purine nucleoside monophosphate biosynthetic process	GOBP	0.013	0	0	0	No
GO:0009132	nucleoside diphosphate metabolic process	GOBP	-0.003	0	0	0	No
GO:0009135	purine nucleoside diphosphate metabolic process	GOBP	-0.001	0	0	0	No
GO:0009150	purine ribonucleotide metabolic process	GOBP	0.007	0	0	0	No
GO:0009152	purine ribonucleotide biosynthetic process	GOBP	0	0	0	0	No
GO:0009154	purine ribonucleotide catabolic process	GOBP	0	0	0	0	No
GO:0009163	nucleoside biosynthetic process	GOBP	0	0	0	0	No
GO:0009164	nucleoside catabolic process	GOBP	0	0	0	0	No
GO:0009165	nucleotide biosynthetic process	GOBP	0	0	0	0	No
GO:0009166	nucleotide catabolic process	GOBP	0	0	0	0	No
GO:0009168	purine ribonucleoside monophosphate biosynthetic process	GOBP	0.013	0	0	0	No
GO:0009179	purine ribonucleoside diphosphate metabolic process	GOBP	-0.001	0	0	0	No
GO:0009185	ribonucleoside diphosphate metabolic process	GOBP	-0.002	0	0	0	No
GO:0009187	cyclic nucleotide metabolic process	GOBP	0	0	0	0	No
GO:0009190	cyclic nucleotide biosynthetic process	GOBP	0	0	0	0	No
GO:0009219	pyrimidine deoxyribonucleotide metabolic process	GOBP	0	0	0	0	No
GO:0009225	nucleotide-sugar metabolic process	GOBP	0.001	0	0	0	No
GO:0009226	nucleotide-sugar biosynthetic process	GOBP	0.001	0	0	0	No
GO:0009247	glycolipid biosynthetic process	GOBP	0	0	0	0	No
GO:0009250	glucan biosynthetic process	GOBP	0.003	0	0	0	No
GO:0009251	glucan catabolic process	GOBP	0.003	0	0	0	No
GO:0009259	ribonucleotide metabolic process	GOBP	0.007	0	0	0	No
GO:0009260	ribonucleotide biosynthetic process	GOBP	0	0	0	0	No
GO:0009261	ribonucleotide catabolic process	GOBP	0	0	0	0	No
GO:0009262	deoxyribonucleotide metabolic process	GOBP	0.002	0	0	0	No
GO:0009264	deoxyribonucleotide catabolic process	GOBP	0.001	0	0	0	No
GO:0009266	response to temperature stimulus	GOBP	-0.003	0	0	0	No
GO:0009267	cellular response to starvation	GOBP	0	0	0	0	No
GO:0009268	response to pH	GOBP	0	0	0	0	No
GO:0009299	mRNA transcription	GOBP	0	0	0	0	No
GO:0009303	rRNA transcription	GOBP	0	0	0	0	No
GO:0009306	protein secretion	GOBP	0	0	0	0	No
GO:0009311	oligosaccharide metabolic process	GOBP	0	0	0	0	No
GO:0009314	response to radiation	GOBP	0	0	0	0	No
GO:0009394	2'-deoxyribonucleotide metabolic process	GOBP	0.001	0	0	0	No
GO:0009395	phospholipid catabolic process	GOBP	0	0	0	0	No
GO:0009408	response to heat	GOBP	-0.001	0	0	0	No
GO:0009409	response to cold	GOBP	0	0	0	0	No
GO:0009411	response to UV	GOBP	0	0	0	0	No
GO:0009416	response to light stimulus	GOBP	0	0	0	0	No
GO:0009435	NAD biosynthetic process	GOBP	0	0	0	0	No
GO:0009451	RNA modification	GOBP	0.023	0	0	0	No
GO:0009452	7-methylguanosine RNA capping	GOBP	0	0	0	0	No
GO:0009566	fertilization	GOBP	0	0	0	0	No
GO:0009581	detection of external stimulus	GOBP	0	0	0	0	No
GO:0009582	detection of abiotic stimulus	GOBP	0	0	0	0	No
GO:0009583	detection of light stimulus	GOBP	-0.006	0	0	0	No
GO:0009584	detection of visible light	GOBP	-0.006	0	0	0	No
GO:0009593	detection of chemical stimulus	GOBP	0.006	0	0	0	No
GO:0009595	detection of biotic stimulus	GOBP	-0.001	0	0	0	No
GO:0009607	response to biotic stimulus	GOBP	-0.005	0	0	0	No
GO:0009611	response to wounding	GOBP	0	0	0	0	No
GO:0009612	response to mechanical stimulus	GOBP	0	0	0	0	No
GO:0009617	response to bacterium	GOBP	-0.003	0	0	0	No
GO:0009620	response to fungus	GOBP	0	0	0	0	No
GO:0009628	response to abiotic stimulus	GOBP	0	0	0	0	No
GO:0009636	response to toxic substance	GOBP	0	0	0	0	No
GO:0009648	photoperiodism	GOBP	0	0	0	0	No
GO:0009649	entrainment of circadian clock	GOBP	0	0	0	0	No
GO:0009712	catechol-containing compound metabolic process	GOBP	0	0	0	0	No
GO:0009719	response to endogenous stimulus	GOBP	0	0	0	0	No
GO:0009725	response to hormone	GOBP	0	0	0	0	No
GO:0009743	response to carbohydrate	GOBP	0	0	0	0	No
GO:0009746	response to hexose	GOBP	0	0	0	0	No
GO:0009749	response to glucose	GOBP	0	0	0	0	No
GO:0009755	hormone-mediated signaling pathway	GOBP	0	0	0	0	No
GO:0009790	embryo development	GOBP	0	0	0	0	No
GO:0009792	embryo development ending in birth or egg hatching	GOBP	0	0	0	0	No
GO:0009798	axis specification	GOBP	0	0	0	0	No
GO:0009799	specification of symmetry	GOBP	0	0	0	0	No
GO:0009855	determination of bilateral symmetry	GOBP	0	0	0	0	No
GO:0009880	embryonic pattern specification	GOBP	0	0	0	0	No
GO:0009887	animal organ morphogenesis	GOBP	0	0	0	0	No
GO:0009894	regulation of catabolic process	GOBP	-0.004	0	0	0	No
GO:0009895	negative regulation of catabolic process	GOBP	0	0	0	0	No
GO:0009896	positive regulation of catabolic process	GOBP	-0.003	0	0	0	No
GO:0009913	epidermal cell differentiation	GOBP	0.001	0	0	0	No
GO:0009914	hormone transport	GOBP	0	0	0	0	No
GO:0009948	anterior/posterior axis specification	GOBP	0	0	0	0	No
GO:0009952	anterior/posterior pattern specification	GOBP	0	0	0	0	No
GO:0009953	dorsal/ventral pattern formation	GOBP	0	0	0	0	No
GO:0009968	negative regulation of signal transduction	GOBP	0	0	0	0	No
GO:0009988	cell-cell recognition	GOBP	0	0	0	0	No
GO:0009991	response to extracellular stimulus	GOBP	0	0	0	0	No
GO:0010001	glial cell differentiation	GOBP	0	0	0	0	No
GO:0010002	cardioblast differentiation	GOBP	0	0	0	0	No
GO:0010035	response to inorganic substance	GOBP	0	0	0	0	No
GO:0010038	response to metal ion	GOBP	0	0	0	0	No
GO:0010107	potassium ion import	GOBP	0	0	0	0	No
GO:0010165	response to X-ray	GOBP	0.001	0	0	0	No
GO:0010171	body morphogenesis	GOBP	-0.001	0	0	0	No
GO:0010212	response to ionizing radiation	GOBP	0.002	0	0	0	No
GO:0010243	response to organonitrogen compound	GOBP	0	0	0	0	No
GO:0010256	endomembrane system organization	GOBP	-0.005	0	0	0	No
GO:0010324	membrane invagination	GOBP	0	0	0	0	No
GO:0010332	response to gamma radiation	GOBP	0	0	0	0	No
GO:0010390	histone monoubiquitination	GOBP	-0.002	0	0	0	No
GO:0010453	regulation of cell fate commitment	GOBP	0	0	0	0	No
GO:0010458	exit from mitosis	GOBP	0	0	0	0	No
GO:0010463	mesenchymal cell proliferation	GOBP	0	0	0	0	No
GO:0010464	regulation of mesenchymal cell proliferation	GOBP	0	0	0	0	No
GO:0010466	negative regulation of peptidase activity	GOBP	0	0	0	0	No
GO:0010469	regulation of receptor activity	GOBP	0	0	0	0	No
GO:0010470	regulation of gastrulation	GOBP	0	0	0	0	No
GO:0010498	proteasomal protein catabolic process	GOBP	-0.006	0	0	0	No
GO:0010501	RNA secondary structure unwinding	GOBP	-0.013	0	0	0	No
GO:0010506	regulation of autophagy	GOBP	0	0	0	0	No
GO:0010507	negative regulation of autophagy	GOBP	0	0	0	0	No
GO:0010508	positive regulation of autophagy	GOBP	0	0	0	0	No
GO:0010517	regulation of phospholipase activity	GOBP	0	0	0	0	No
GO:0010518	positive regulation of phospholipase activity	GOBP	0	0	0	0	No
GO:0010522	regulation of calcium ion transport into cytosol	GOBP	0	0	0	0	No
GO:0010524	positive regulation of calcium ion transport into cytosol	GOBP	0	0	0	0	No
GO:0010528	regulation of transposition	GOBP	0	0	0	0	No
GO:0010529	negative regulation of transposition	GOBP	0	0	0	0	No
GO:0010543	regulation of platelet activation	GOBP	0	0	0	0	No
GO:0010559	regulation of glycoprotein biosynthetic process	GOBP	0	0	0	0	No
GO:0010560	positive regulation of glycoprotein biosynthetic process	GOBP	0	0	0	0	No
GO:0010562	positive regulation of phosphorus metabolic process	GOBP	0	0	0	0	No
GO:0010563	negative regulation of phosphorus metabolic process	GOBP	0	0	0	0	No
GO:0010564	regulation of cell cycle process	GOBP	0.002	0	0	0	No
GO:0010569	regulation of double-strand break repair via homologous recombination	GOBP	0.001	0	0	0	No
GO:0010573	vascular endothelial growth factor production	GOBP	0	0	0	0	No
GO:0010574	regulation of vascular endothelial growth factor production	GOBP	0	0	0	0	No
GO:0010575	positive regulation of vascular endothelial growth factor production	GOBP	0	0	0	0	No
GO:0010586	miRNA metabolic process	GOBP	0	0	0	0	No
GO:0010591	regulation of lamellipodium assembly	GOBP	0	0	0	0	No
GO:0010594	regulation of endothelial cell migration	GOBP	0	0	0	0	No
GO:0010595	positive regulation of endothelial cell migration	GOBP	0	0	0	0	No
GO:0010596	negative regulation of endothelial cell migration	GOBP	0	0	0	0	No
GO:0010608	posttranscriptional regulation of gene expression	GOBP	-0.006	0	0	0	No
GO:0010611	regulation of cardiac muscle hypertrophy	GOBP	0	0	0	0	No
GO:0010613	positive regulation of cardiac muscle hypertrophy	GOBP	0	0	0	0	No
GO:0010631	epithelial cell migration	GOBP	0	0	0	0	No
GO:0010632	regulation of epithelial cell migration	GOBP	0	0	0	0	No
GO:0010633	negative regulation of epithelial cell migration	GOBP	0	0	0	0	No
GO:0010634	positive regulation of epithelial cell migration	GOBP	0	0	0	0	No
GO:0010638	positive regulation of organelle organization	GOBP	0	0	0	0	No
GO:0010639	negative regulation of organelle organization	GOBP	-0.002	0	0	0	No
GO:0010640	regulation of platelet-derived growth factor receptor signaling pathway	GOBP	0	0	0	0	No
GO:0010644	cell communication by electrical coupling	GOBP	0	0	0	0	No
GO:0010648	negative regulation of cell communication	GOBP	0	0	0	0	No
GO:0010657	muscle cell apoptotic process	GOBP	0	0	0	0	No
GO:0010660	regulation of muscle cell apoptotic process	GOBP	0	0	0	0	No
GO:0010675	regulation of cellular carbohydrate metabolic process	GOBP	0	0	0	0	No
GO:0010676	positive regulation of cellular carbohydrate metabolic process	GOBP	0	0	0	0	No
GO:0010677	negative regulation of cellular carbohydrate metabolic process	GOBP	0	0	0	0	No
GO:0010712	regulation of collagen metabolic process	GOBP	0	0	0	0	No
GO:0010717	regulation of epithelial to mesenchymal transition	GOBP	-0.001	0	0	0	No
GO:0010719	negative regulation of epithelial to mesenchymal transition	GOBP	0	0	0	0	No
GO:0010720	positive regulation of cell development	GOBP	0	0	0	0	No
GO:0010721	negative regulation of cell development	GOBP	0	0	0	0	No
GO:0010737	protein kinase A signaling	GOBP	0	0	0	0	No
GO:0010738	regulation of protein kinase A signaling	GOBP	0	0	0	0	No
GO:0010742	macrophage derived foam cell differentiation	GOBP	0.001	0	0	0	No
GO:0010743	regulation of macrophage derived foam cell differentiation	GOBP	0.001	0	0	0	No
GO:0010744	positive regulation of macrophage derived foam cell differentiation	GOBP	0	0	0	0	No
GO:0010761	fibroblast migration	GOBP	0	0	0	0	No
GO:0010765	positive regulation of sodium ion transport	GOBP	0	0	0	0	No
GO:0010769	regulation of cell morphogenesis involved in differentiation	GOBP	0	0	0	0	No
GO:0010770	positive regulation of cell morphogenesis involved in differentiation	GOBP	0	0	0	0	No
GO:0010771	negative regulation of cell morphogenesis involved in differentiation	GOBP	0	0	0	0	No
GO:0010799	regulation of peptidyl-threonine phosphorylation	GOBP	0	0	0	0	No
GO:0010800	positive regulation of peptidyl-threonine phosphorylation	GOBP	0	0	0	0	No
GO:0010801	negative regulation of peptidyl-threonine phosphorylation	GOBP	0	0	0	0	No
GO:0010803	regulation of tumor necrosis factor-mediated signaling pathway	GOBP	0	0	0	0	No
GO:0010804	negative regulation of tumor necrosis factor-mediated signaling pathway	GOBP	0	0	0	0	No
GO:0010810	regulation of cell-substrate adhesion	GOBP	0	0	0	0	No
GO:0010811	positive regulation of cell-substrate adhesion	GOBP	0	0	0	0	No
GO:0010812	negative regulation of cell-substrate adhesion	GOBP	0	0	0	0	No
GO:0010817	regulation of hormone levels	GOBP	0.002	0	0	0	No
GO:0010818	T cell chemotaxis	GOBP	-0.006	0	0	0	No
GO:0010821	regulation of mitochondrion organization	GOBP	0	0	0	0	No
GO:0010822	positive regulation of mitochondrion organization	GOBP	0	0	0	0	No
GO:0010823	negative regulation of mitochondrion organization	GOBP	0.001	0	0	0	No
GO:0010824	regulation of centrosome duplication	GOBP	0.005	0	0	0	No
GO:0010827	regulation of glucose transport	GOBP	0	0	0	0	No
GO:0010828	positive regulation of glucose transport	GOBP	0	0	0	0	No
GO:0010831	positive regulation of myotube differentiation	GOBP	-0.001	0	0	0	No
GO:0010833	telomere maintenance via telomere lengthening	GOBP	-0.004	0	0	0	No
GO:0010837	regulation of keratinocyte proliferation	GOBP	0	0	0	0	No
GO:0010862	positive regulation of pathway-restricted SMAD protein phosphorylation	GOBP	0	0	0	0	No
GO:0010863	positive regulation of phospholipase C activity	GOBP	0	0	0	0	No
GO:0010869	regulation of receptor biosynthetic process	GOBP	0	0	0	0	No
GO:0010874	regulation of cholesterol efflux	GOBP	0	0	0	0	No
GO:0010880	regulation of release of sequestered calcium ion into cytosol by sarcoplasmic reticulum	GOBP	0	0	0	0	No
GO:0010881	regulation of cardiac muscle contraction by regulation of the release of sequestered calcium ion	GOBP	0	0	0	0	No
GO:0010882	regulation of cardiac muscle contraction by calcium ion signaling	GOBP	-0.002	0	0	0	No
GO:0010883	regulation of lipid storage	GOBP	0.001	0	0	0	No
GO:0010884	positive regulation of lipid storage	GOBP	0	0	0	0	No
GO:0010894	negative regulation of steroid biosynthetic process	GOBP	0	0	0	0	No
GO:0010906	regulation of glucose metabolic process	GOBP	0	0	0	0	No
GO:0010907	positive regulation of glucose metabolic process	GOBP	0	0	0	0	No
GO:0010921	regulation of phosphatase activity	GOBP	0	0	0	0	No
GO:0010922	positive regulation of phosphatase activity	GOBP	0	0	0	0	No
GO:0010923	negative regulation of phosphatase activity	GOBP	0	0	0	0	No
GO:0010927	cellular component assembly involved in morphogenesis	GOBP	-0.018	0	0	0	No
GO:0010939	regulation of necrotic cell death	GOBP	-0.001	0	0	0	No
GO:0010942	positive regulation of cell death	GOBP	0	0	0	0	No
GO:0010948	negative regulation of cell cycle process	GOBP	0	0	0	0	No
GO:0010950	positive regulation of endopeptidase activity	GOBP	0	0	0	0	No
GO:0010951	negative regulation of endopeptidase activity	GOBP	0	0	0	0	No
GO:0010952	positive regulation of peptidase activity	GOBP	0	0	0	0	No
GO:0010954	positive regulation of protein processing	GOBP	0	0	0	0	No
GO:0010955	negative regulation of protein processing	GOBP	-0.001	0	0	0	No
GO:0010959	regulation of metal ion transport	GOBP	0	0	0	0	No
GO:0010962	regulation of glucan biosynthetic process	GOBP	0	0	0	0	No
GO:0010970	transport along microtubule	GOBP	0.009	0	0	0	No
GO:0010971	positive regulation of G2/M transition of mitotic cell cycle	GOBP	0	0	0	0	No
GO:0010972	negative regulation of G2/M transition of mitotic cell cycle	GOBP	-0.001	0	0	0	No
GO:0010975	regulation of neuron projection development	GOBP	-0.005	0	0	0	No
GO:0010976	positive regulation of neuron projection development	GOBP	-0.007	0	0	0	No
GO:0010977	negative regulation of neuron projection development	GOBP	0	0	0	0	No
GO:0014013	regulation of gliogenesis	GOBP	0	0	0	0	No
GO:0014015	positive regulation of gliogenesis	GOBP	0	0	0	0	No
GO:0014020	primary neural tube formation	GOBP	0	0	0	0	No
GO:0014031	mesenchymal cell development	GOBP	0	0	0	0	No
GO:0014032	neural crest cell development	GOBP	0	0	0	0	No
GO:0014033	neural crest cell differentiation	GOBP	0	0	0	0	No
GO:0014046	dopamine secretion	GOBP	0	0	0	0	No
GO:0014047	glutamate secretion	GOBP	0	0	0	0	No
GO:0014059	regulation of dopamine secretion	GOBP	0	0	0	0	No
GO:0014065	phosphatidylinositol 3-kinase signaling	GOBP	0	0	0	0	No
GO:0014066	regulation of phosphatidylinositol 3-kinase signaling	GOBP	0	0	0	0	No
GO:0014068	positive regulation of phosphatidylinositol 3-kinase signaling	GOBP	0	0	0	0	No
GO:0014070	response to organic cyclic compound	GOBP	0	0	0	0	No
GO:0014074	response to purine-containing compound	GOBP	0	0	0	0	No
GO:0014706	striated muscle tissue development	GOBP	-0.004	0	0	0	No
GO:0014742	positive regulation of muscle hypertrophy	GOBP	0	0	0	0	No
GO:0014743	regulation of muscle hypertrophy	GOBP	0	0	0	0	No
GO:0014808	release of sequestered calcium ion into cytosol by sarcoplasmic reticulum	GOBP	0	0	0	0	No
GO:0014812	muscle cell migration	GOBP	0	0	0	0	No
GO:0014855	striated muscle cell proliferation	GOBP	0	0	0	0	No
GO:0014888	striated muscle adaptation	GOBP	0	0	0	0	No
GO:0014896	muscle hypertrophy	GOBP	0	0	0	0	No
GO:0014897	striated muscle hypertrophy	GOBP	0	0	0	0	No
GO:0014902	myotube differentiation	GOBP	0	0	0	0	No
GO:0014904	myotube cell development	GOBP	0	0	0	0	No
GO:0014909	smooth muscle cell migration	GOBP	0	0	0	0	No
GO:0014910	regulation of smooth muscle cell migration	GOBP	-0.001	0	0	0	No
GO:0015012	heparan sulfate proteoglycan biosynthetic process	GOBP	0	0	0	0	No
GO:0015672	monovalent inorganic cation transport	GOBP	0	0	0	0	No
GO:0015682	ferric iron transport	GOBP	0.003	0	0	0	No
GO:0015696	ammonium transport	GOBP	0	0	0	0	No
GO:0015698	inorganic anion transport	GOBP	0.007	0	0	0	No
GO:0015701	bicarbonate transport	GOBP	0.005	0	0	0	No
GO:0015749	monosaccharide transport	GOBP	0	0	0	0	No
GO:0015758	glucose transport	GOBP	0	0	0	0	No
GO:0015807	L-amino acid transport	GOBP	0	0	0	0	No
GO:0015837	amine transport	GOBP	0	0	0	0	No
GO:0015844	monoamine transport	GOBP	0	0	0	0	No
GO:0015872	dopamine transport	GOBP	0	0	0	0	No
GO:0015931	nucleobase-containing compound transport	GOBP	-0.007	0	0	0	No
GO:0015949	nucleobase-containing small molecule interconversion	GOBP	0.001	0	0	0	No
GO:0016049	cell growth	GOBP	0	0	0	0	No
GO:0016050	vesicle organization	GOBP	0	0	0	0	No
GO:0016055	Wnt signaling pathway	GOBP	0	0	0	0	No
GO:0016056	rhodopsin mediated signaling pathway	GOBP	-0.006	0	0	0	No
GO:0016064	immunoglobulin mediated immune response	GOBP	0	0	0	0	No
GO:0016075	rRNA catabolic process	GOBP	0	0	0	0	No
GO:0016079	synaptic vesicle exocytosis	GOBP	-0.002	0	0	0	No
GO:0016202	regulation of striated muscle tissue development	GOBP	0	0	0	0	No
GO:0016226	iron-sulfur cluster assembly	GOBP	0.002	0	0	0	No
GO:0016233	telomere capping	GOBP	-0.002	0	0	0	No
GO:0016236	macroautophagy	GOBP	-0.004	0	0	0	No
GO:0016239	positive regulation of macroautophagy	GOBP	0	0	0	0	No
GO:0016241	regulation of macroautophagy	GOBP	0	0	0	0	No
GO:0016242	negative regulation of macroautophagy	GOBP	0	0	0	0	No
GO:0016254	preassembly of GPI anchor in ER membrane	GOBP	0.001	0	0	0	No
GO:0016266	O-glycan processing	GOBP	0.004	0	0	0	No
GO:0016311	dephosphorylation	GOBP	0	0	0	0	No
GO:0016331	morphogenesis of embryonic epithelium	GOBP	0	0	0	0	No
GO:0016338	calcium-independent cell-cell adhesion via plasma membrane cell-adhesion molecules	GOBP	0	0	0	0	No
GO:0016358	dendrite development	GOBP	0	0	0	0	No
GO:0016441	posttranscriptional gene silencing	GOBP	-0.004	0	0	0	No
GO:0016444	somatic cell DNA recombination	GOBP	0	0	0	0	No
GO:0016445	somatic diversification of immunoglobulins	GOBP	0	0	0	0	No
GO:0016447	somatic recombination of immunoglobulin gene segments	GOBP	0	0	0	0	No
GO:0016486	peptide hormone processing	GOBP	0	0	0	0	No
GO:0016525	negative regulation of angiogenesis	GOBP	0	0	0	0	No
GO:0016567	protein ubiquitination	GOBP	-0.005	0	0	0	No
GO:0016569	covalent chromatin modification	GOBP	-0.005	0	0	0	No
GO:0016570	histone modification	GOBP	-0.007	0	0	0	No
GO:0016571	histone methylation	GOBP	-0.002	0	0	0	No
GO:0016572	histone phosphorylation	GOBP	0.002	0	0	0	No
GO:0016573	histone acetylation	GOBP	-0.003	0	0	0	No
GO:0016574	histone ubiquitination	GOBP	-0.004	0	0	0	No
GO:0016575	histone deacetylation	GOBP	0	0	0	0	No
GO:0016577	histone demethylation	GOBP	0	0	0	0	No
GO:0016578	histone deubiquitination	GOBP	0	0	0	0	No
GO:0016579	protein deubiquitination	GOBP	-0.006	0	0	0	No
GO:0016601	Rac protein signal transduction	GOBP	0	0	0	0	No
GO:0016925	protein sumoylation	GOBP	0.001	0	0	0	No
GO:0017015	regulation of transforming growth factor beta receptor signaling pathway	GOBP	0	0	0	0	No
GO:0017038	protein import	GOBP	0	0	0	0	No
GO:0017145	stem cell division	GOBP	0	0	0	0	No
GO:0017148	negative regulation of translation	GOBP	-0.004	0	0	0	No
GO:0017156	calcium ion regulated exocytosis	GOBP	-0.002	0	0	0	No
GO:0017157	regulation of exocytosis	GOBP	0	0	0	0	No
GO:0017158	regulation of calcium ion-dependent exocytosis	GOBP	-0.002	0	0	0	No
GO:0018022	peptidyl-lysine methylation	GOBP	0	0	0	0	No
GO:0018023	peptidyl-lysine trimethylation	GOBP	0	0	0	0	No
GO:0018105	peptidyl-serine phosphorylation	GOBP	0	0	0	0	No
GO:0018107	peptidyl-threonine phosphorylation	GOBP	0	0	0	0	No
GO:0018108	peptidyl-tyrosine phosphorylation	GOBP	0	0	0	0	No
GO:0018126	protein hydroxylation	GOBP	0.002	0	0	0	No
GO:0018146	keratan sulfate biosynthetic process	GOBP	0	0	0	0	No
GO:0018149	peptide cross-linking	GOBP	-0.001	0	0	0	No
GO:0018193	peptidyl-amino acid modification	GOBP	0	0	0	0	No
GO:0018195	peptidyl-arginine modification	GOBP	0	0	0	0	No
GO:0018196	peptidyl-asparagine modification	GOBP	0	0	0	0	No
GO:0018198	peptidyl-cysteine modification	GOBP	0	0	0	0	No
GO:0018205	peptidyl-lysine modification	GOBP	-0.004	0	0	0	No
GO:0018209	peptidyl-serine modification	GOBP	0	0	0	0	No
GO:0018210	peptidyl-threonine modification	GOBP	0	0	0	0	No
GO:0018212	peptidyl-tyrosine modification	GOBP	-0.001	0	0	0	No
GO:0018279	protein N-linked glycosylation via asparagine	GOBP	0	0	0	0	No
GO:0018345	protein palmitoylation	GOBP	0	0	0	0	No
GO:0018393	internal peptidyl-lysine acetylation	GOBP	-0.003	0	0	0	No
GO:0018394	peptidyl-lysine acetylation	GOBP	-0.003	0	0	0	No
GO:0018410	C-terminal protein amino acid modification	GOBP	0	0	0	0	No
GO:0019048	modulation by virus of host morphology or physiology	GOBP	0	0	0	0	No
GO:0019054	modulation by virus of host process	GOBP	0	0	0	0	No
GO:0019058	viral life cycle	GOBP	-0.005	0	0	0	No
GO:0019068	virion assembly	GOBP	-0.006	0	0	0	No
GO:0019076	viral release from host cell	GOBP	0.001	0	0	0	No
GO:0019079	viral genome replication	GOBP	-0.001	0	0	0	No
GO:0019226	transmission of nerve impulse	GOBP	0	0	0	0	No
GO:0019228	neuronal action potential	GOBP	0	0	0	0	No
GO:0019229	regulation of vasoconstriction	GOBP	0.001	0	0	0	No
GO:0019233	sensory perception of pain	GOBP	0	0	0	0	No
GO:0019359	nicotinamide nucleotide biosynthetic process	GOBP	0	0	0	0	No
GO:0019362	pyridine nucleotide metabolic process	GOBP	0.002	0	0	0	No
GO:0019363	pyridine nucleotide biosynthetic process	GOBP	0	0	0	0	No
GO:0019370	leukotriene biosynthetic process	GOBP	0	0	0	0	No
GO:0019372	lipoxygenase pathway	GOBP	0	0	0	0	No
GO:0019439	aromatic compound catabolic process	GOBP	-0.015	0	0	0	No
GO:0019637	organophosphate metabolic process	GOBP	0.003	0	0	0	No
GO:0019674	NAD metabolic process	GOBP	0.001	0	0	0	No
GO:0019692	deoxyribose phosphate metabolic process	GOBP	0.001	0	0	0	No
GO:0019693	ribose phosphate metabolic process	GOBP	0.006	0	0	0	No
GO:0019722	calcium-mediated signaling	GOBP	0	0	0	0	No
GO:0019724	B cell mediated immunity	GOBP	0	0	0	0	No
GO:0019725	cellular homeostasis	GOBP	0	0	0	0	No
GO:0019730	antimicrobial humoral response	GOBP	0.002	0	0	0	No
GO:0019731	antibacterial humoral response	GOBP	-0.001	0	0	0	No
GO:0019751	polyol metabolic process	GOBP	0	0	0	0	No
GO:0019827	stem cell population maintenance	GOBP	0	0	0	0	No
GO:0019915	lipid storage	GOBP	0.005	0	0	0	No
GO:0019932	second-messenger-mediated signaling	GOBP	0	0	0	0	No
GO:0019933	cAMP-mediated signaling	GOBP	0	0	0	0	No
GO:0019935	cyclic-nucleotide-mediated signaling	GOBP	0	0	0	0	No
GO:0019941	modification-dependent protein catabolic process	GOBP	-0.007	0	0	0	No
GO:0019953	sexual reproduction	GOBP	0	0	0	0	No
GO:0019985	translesion synthesis	GOBP	0.003	0	0	0	No
GO:0021510	spinal cord development	GOBP	0	0	0	0	No
GO:0021536	diencephalon development	GOBP	0	0	0	0	No
GO:0021537	telencephalon development	GOBP	-0.001	0	0	0	No
GO:0021543	pallium development	GOBP	0	0	0	0	No
GO:0021545	cranial nerve development	GOBP	0	0	0	0	No
GO:0021549	cerebellum development	GOBP	0	0	0	0	No
GO:0021575	hindbrain morphogenesis	GOBP	0	0	0	0	No
GO:0021587	cerebellum morphogenesis	GOBP	0	0	0	0	No
GO:0021675	nerve development	GOBP	0	0	0	0	No
GO:0021695	cerebellar cortex development	GOBP	0	0	0	0	No
GO:0021700	developmental maturation	GOBP	0	0	0	0	No
GO:0021761	limbic system development	GOBP	0	0	0	0	No
GO:0021762	substantia nigra development	GOBP	0	0	0	0	No
GO:0021766	hippocampus development	GOBP	0	0	0	0	No
GO:0021782	glial cell development	GOBP	0	0	0	0	No
GO:0021795	cerebral cortex cell migration	GOBP	0	0	0	0	No
GO:0021872	forebrain generation of neurons	GOBP	-0.001	0	0	0	No
GO:0021879	forebrain neuron differentiation	GOBP	-0.002	0	0	0	No
GO:0021885	forebrain cell migration	GOBP	0	0	0	0	No
GO:0021915	neural tube development	GOBP	0	0	0	0	No
GO:0021953	central nervous system neuron differentiation	GOBP	-0.001	0	0	0	No
GO:0021954	central nervous system neuron development	GOBP	-0.001	0	0	0	No
GO:0021987	cerebral cortex development	GOBP	0	0	0	0	No
GO:0022008	neurogenesis	GOBP	-0.001	0	0	0	No
GO:0022029	telencephalon cell migration	GOBP	0	0	0	0	No
GO:0022037	metencephalon development	GOBP	0	0	0	0	No
GO:0022400	regulation of rhodopsin mediated signaling pathway	GOBP	-0.005	0	0	0	No
GO:0022404	molting cycle process	GOBP	0	0	0	0	No
GO:0022405	hair cycle process	GOBP	0	0	0	0	No
GO:0022406	membrane docking	GOBP	-0.004	0	0	0	No
GO:0022408	negative regulation of cell-cell adhesion	GOBP	0	0	0	0	No
GO:0022411	cellular component disassembly	GOBP	0	0	0	0	No
GO:0022412	cellular process involved in reproduction in multicellular organism	GOBP	0	0	0	0	No
GO:0022414	reproductive process	GOBP	0	0	0	0	No
GO:0022600	digestive system process	GOBP	0.007	0	0	0	No
GO:0022602	ovulation cycle process	GOBP	0	0	0	0	No
GO:0022603	regulation of anatomical structure morphogenesis	GOBP	0	0	0	0	No
GO:0022604	regulation of cell morphogenesis	GOBP	0	0	0	0	No
GO:0022610	biological adhesion	GOBP	0	0	0	0	No
GO:0022612	gland morphogenesis	GOBP	0	0	0	0	No
GO:0022616	DNA strand elongation	GOBP	0.047	0	0	0	No
GO:0022617	extracellular matrix disassembly	GOBP	-0.004	0	0	0	No
GO:0022898	regulation of transmembrane transporter activity	GOBP	0	0	0	0	No
GO:0023014	signal transduction by protein phosphorylation	GOBP	0	0	0	0	No
GO:0023057	negative regulation of signaling	GOBP	0	0	0	0	No
GO:0023061	signal release	GOBP	0	0	0	0	No
GO:0030001	metal ion transport	GOBP	0	0	0	0	No
GO:0030003	cellular cation homeostasis	GOBP	0	0	0	0	No
GO:0030004	cellular monovalent inorganic cation homeostasis	GOBP	0	0	0	0	No
GO:0030010	establishment of cell polarity	GOBP	0	0	0	0	No
GO:0030029	actin filament-based process	GOBP	0	0	0	0	No
GO:0030030	cell projection organization	GOBP	0	0	0	0	No
GO:0030031	cell projection assembly	GOBP	0	0	0	0	No
GO:0030032	lamellipodium assembly	GOBP	0	0	0	0	No
GO:0030036	actin cytoskeleton organization	GOBP	0	0	0	0	No
GO:0030038	contractile actin filament bundle assembly	GOBP	0	0	0	0	No
GO:0030041	actin filament polymerization	GOBP	0	0	0	0	No
GO:0030042	actin filament depolymerization	GOBP	0	0	0	0	No
GO:0030048	actin filament-based movement	GOBP	-0.003	0	0	0	No
GO:0030072	peptide hormone secretion	GOBP	0	0	0	0	No
GO:0030073	insulin secretion	GOBP	0	0	0	0	No
GO:0030097	hemopoiesis	GOBP	0	0	0	0	No
GO:0030099	myeloid cell differentiation	GOBP	0	0	0	0	No
GO:0030100	regulation of endocytosis	GOBP	0	0	0	0	No
GO:0030101	natural killer cell activation	GOBP	0	0	0	0	No
GO:0030104	water homeostasis	GOBP	0	0	0	0	No
GO:0030111	regulation of Wnt signaling pathway	GOBP	0	0	0	0	No
GO:0030148	sphingolipid biosynthetic process	GOBP	0	0	0	0	No
GO:0030149	sphingolipid catabolic process	GOBP	0	0	0	0	No
GO:0030150	protein import into mitochondrial matrix	GOBP	0.001	0	0	0	No
GO:0030162	regulation of proteolysis	GOBP	0	0	0	0	No
GO:0030163	protein catabolic process	GOBP	-0.004	0	0	0	No
GO:0030166	proteoglycan biosynthetic process	GOBP	0	0	0	0	No
GO:0030168	platelet activation	GOBP	-0.007	0	0	0	No
GO:0030177	positive regulation of Wnt signaling pathway	GOBP	0	0	0	0	No
GO:0030178	negative regulation of Wnt signaling pathway	GOBP	0	0	0	0	No
GO:0030182	neuron differentiation	GOBP	-0.003	0	0	0	No
GO:0030183	B cell differentiation	GOBP	-0.004	0	0	0	No
GO:0030201	heparan sulfate proteoglycan metabolic process	GOBP	0	0	0	0	No
GO:0030203	glycosaminoglycan metabolic process	GOBP	-0.001	0	0	0	No
GO:0030204	chondroitin sulfate metabolic process	GOBP	-0.005	0	0	0	No
GO:0030206	chondroitin sulfate biosynthetic process	GOBP	-0.011	0	0	0	No
GO:0030212	hyaluronan metabolic process	GOBP	0	0	0	0	No
GO:0030214	hyaluronan catabolic process	GOBP	0	0	0	0	No
GO:0030216	keratinocyte differentiation	GOBP	-0.004	0	0	0	No
GO:0030218	erythrocyte differentiation	GOBP	0	0	0	0	No
GO:0030224	monocyte differentiation	GOBP	0	0	0	0	No
GO:0030225	macrophage differentiation	GOBP	-0.001	0	0	0	No
GO:0030239	myofibril assembly	GOBP	-0.02	0	0	0	No
GO:0030260	entry into host cell	GOBP	-0.001	0	0	0	No
GO:0030261	chromosome condensation	GOBP	0.001	0	0	0	No
GO:0030262	apoptotic nuclear changes	GOBP	0	0	0	0	No
GO:0030278	regulation of ossification	GOBP	0	0	0	0	No
GO:0030279	negative regulation of ossification	GOBP	0	0	0	0	No
GO:0030282	bone mineralization	GOBP	0	0	0	0	No
GO:0030307	positive regulation of cell growth	GOBP	0	0	0	0	No
GO:0030308	negative regulation of cell growth	GOBP	0	0	0	0	No
GO:0030316	osteoclast differentiation	GOBP	0	0	0	0	No
GO:0030317	flagellated sperm motility	GOBP	0.002	0	0	0	No
GO:0030322	stabilization of membrane potential	GOBP	0	0	0	0	No
GO:0030323	respiratory tube development	GOBP	0	0	0	0	No
GO:0030324	lung development	GOBP	0	0	0	0	No
GO:0030326	embryonic limb morphogenesis	GOBP	-0.002	0	0	0	No
GO:0030330	DNA damage response, signal transduction by p53 class mediator	GOBP	0	0	0	0	No
GO:0030334	regulation of cell migration	GOBP	0	0	0	0	No
GO:0030335	positive regulation of cell migration	GOBP	0	0	0	0	No
GO:0030336	negative regulation of cell migration	GOBP	0	0	0	0	No
GO:0030433	ubiquitin-dependent ERAD pathway	GOBP	0.006	0	0	0	No
GO:0030488	tRNA methylation	GOBP	0.005	0	0	0	No
GO:0030500	regulation of bone mineralization	GOBP	0	0	0	0	No
GO:0030501	positive regulation of bone mineralization	GOBP	0	0	0	0	No
GO:0030509	BMP signaling pathway	GOBP	0	0	0	0	No
GO:0030510	regulation of BMP signaling pathway	GOBP	0	0	0	0	No
GO:0030511	positive regulation of transforming growth factor beta receptor signaling pathway	GOBP	0	0	0	0	No
GO:0030512	negative regulation of transforming growth factor beta receptor signaling pathway	GOBP	0	0	0	0	No
GO:0030513	positive regulation of BMP signaling pathway	GOBP	0	0	0	0	No
GO:0030514	negative regulation of BMP signaling pathway	GOBP	0	0	0	0	No
GO:0030516	regulation of axon extension	GOBP	0	0	0	0	No
GO:0030518	intracellular steroid hormone receptor signaling pathway	GOBP	0	0	0	0	No
GO:0030520	intracellular estrogen receptor signaling pathway	GOBP	0	0	0	0	No
GO:0030521	androgen receptor signaling pathway	GOBP	0	0	0	0	No
GO:0030522	intracellular receptor signaling pathway	GOBP	0	0	0	0	No
GO:0030534	adult behavior	GOBP	0	0	0	0	No
GO:0030641	regulation of cellular pH	GOBP	0	0	0	0	No
GO:0030705	cytoskeleton-dependent intracellular transport	GOBP	0.001	0	0	0	No
GO:0030730	sequestering of triglyceride	GOBP	0.012	0	0	0	No
GO:0030799	regulation of cyclic nucleotide metabolic process	GOBP	0	0	0	0	No
GO:0030800	negative regulation of cyclic nucleotide metabolic process	GOBP	0	0	0	0	No
GO:0030801	positive regulation of cyclic nucleotide metabolic process	GOBP	0	0	0	0	No
GO:0030802	regulation of cyclic nucleotide biosynthetic process	GOBP	0	0	0	0	No
GO:0030803	negative regulation of cyclic nucleotide biosynthetic process	GOBP	0	0	0	0	No
GO:0030804	positive regulation of cyclic nucleotide biosynthetic process	GOBP	0	0	0	0	No
GO:0030808	regulation of nucleotide biosynthetic process	GOBP	0	0	0	0	No
GO:0030809	negative regulation of nucleotide biosynthetic process	GOBP	0	0	0	0	No
GO:0030810	positive regulation of nucleotide biosynthetic process	GOBP	0	0	0	0	No
GO:0030814	regulation of cAMP metabolic process	GOBP	0	0	0	0	No
GO:0030815	negative regulation of cAMP metabolic process	GOBP	0	0	0	0	No
GO:0030816	positive regulation of cAMP metabolic process	GOBP	0	0	0	0	No
GO:0030817	regulation of cAMP biosynthetic process	GOBP	0	0	0	0	No
GO:0030818	negative regulation of cAMP biosynthetic process	GOBP	0	0	0	0	No
GO:0030819	positive regulation of cAMP biosynthetic process	GOBP	0	0	0	0	No
GO:0030832	regulation of actin filament length	GOBP	0	0	0	0	No
GO:0030833	regulation of actin filament polymerization	GOBP	0	0	0	0	No
GO:0030834	regulation of actin filament depolymerization	GOBP	0	0	0	0	No
GO:0030837	negative regulation of actin filament polymerization	GOBP	0	0	0	0	No
GO:0030838	positive regulation of actin filament polymerization	GOBP	0	0	0	0	No
GO:0030851	granulocyte differentiation	GOBP	0	0	0	0	No
GO:0030855	epithelial cell differentiation	GOBP	0	0	0	0	No
GO:0030856	regulation of epithelial cell differentiation	GOBP	0	0	0	0	No
GO:0030857	negative regulation of epithelial cell differentiation	GOBP	0	0	0	0	No
GO:0030858	positive regulation of epithelial cell differentiation	GOBP	0	0	0	0	No
GO:0030865	cortical cytoskeleton organization	GOBP	0	0	0	0	No
GO:0030866	cortical actin cytoskeleton organization	GOBP	0	0	0	0	No
GO:0030879	mammary gland development	GOBP	0	0	0	0	No
GO:0030888	regulation of B cell proliferation	GOBP	-0.017	0	0	0	No
GO:0030890	positive regulation of B cell proliferation	GOBP	-0.003	0	0	0	No
GO:0030900	forebrain development	GOBP	0	0	0	0	No
GO:0030901	midbrain development	GOBP	0	0	0	0	No
GO:0030902	hindbrain development	GOBP	0	0	0	0	No
GO:0030947	regulation of vascular endothelial growth factor receptor signaling pathway	GOBP	-0.001	0	0	0	No
GO:0030968	endoplasmic reticulum unfolded protein response	GOBP	-0.003	0	0	0	No
GO:0030970	retrograde protein transport, ER to cytosol	GOBP	0.003	0	0	0	No
GO:0031016	pancreas development	GOBP	0	0	0	0	No
GO:0031018	endocrine pancreas development	GOBP	0	0	0	0	No
GO:0031023	microtubule organizing center organization	GOBP	0.007	0	0	0	No
GO:0031032	actomyosin structure organization	GOBP	0	0	0	0	No
GO:0031047	gene silencing by RNA	GOBP	-0.002	0	0	0	No
GO:0031050	dsRNA fragmentation	GOBP	0	0	0	0	No
GO:0031056	regulation of histone modification	GOBP	0	0	0	0	No
GO:0031057	negative regulation of histone modification	GOBP	0	0	0	0	No
GO:0031058	positive regulation of histone modification	GOBP	0.001	0	0	0	No
GO:0031060	regulation of histone methylation	GOBP	-0.002	0	0	0	No
GO:0031062	positive regulation of histone methylation	GOBP	-0.003	0	0	0	No
GO:0031063	regulation of histone deacetylation	GOBP	0	0	0	0	No
GO:0031076	embryonic camera-type eye development	GOBP	0	0	0	0	No
GO:0031098	stress-activated protein kinase signaling cascade	GOBP	0	0	0	0	No
GO:0031099	regeneration	GOBP	0	0	0	0	No
GO:0031102	neuron projection regeneration	GOBP	0	0	0	0	No
GO:0031103	axon regeneration	GOBP	0	0	0	0	No
GO:0031109	microtubule polymerization or depolymerization	GOBP	0	0	0	0	No
GO:0031110	regulation of microtubule polymerization or depolymerization	GOBP	0	0	0	0	No
GO:0031111	negative regulation of microtubule polymerization or depolymerization	GOBP	0	0	0	0	No
GO:0031112	positive regulation of microtubule polymerization or depolymerization	GOBP	0	0	0	0	No
GO:0031113	regulation of microtubule polymerization	GOBP	-0.003	0	0	0	No
GO:0031116	positive regulation of microtubule polymerization	GOBP	0	0	0	0	No
GO:0031122	cytoplasmic microtubule organization	GOBP	0	0	0	0	No
GO:0031124	mRNA 3'-end processing	GOBP	-0.008	0	0	0	No
GO:0031163	metallo-sulfur cluster assembly	GOBP	0.002	0	0	0	No
GO:0031167	rRNA methylation	GOBP	-0.001	0	0	0	No
GO:0031175	neuron projection development	GOBP	-0.004	0	0	0	No
GO:0031214	biomineral tissue development	GOBP	-0.001	0	0	0	No
GO:0031268	pseudopodium organization	GOBP	0	0	0	0	No
GO:0031279	regulation of cyclase activity	GOBP	0	0	0	0	No
GO:0031280	negative regulation of cyclase activity	GOBP	0	0	0	0	No
GO:0031281	positive regulation of cyclase activity	GOBP	0	0	0	0	No
GO:0031293	membrane protein intracellular domain proteolysis	GOBP	0	0	0	0	No
GO:0031297	replication fork processing	GOBP	0.007	0	0	0	No
GO:0031329	regulation of cellular catabolic process	GOBP	-0.004	0	0	0	No
GO:0031330	negative regulation of cellular catabolic process	GOBP	0	0	0	0	No
GO:0031331	positive regulation of cellular catabolic process	GOBP	-0.003	0	0	0	No
GO:0031333	negative regulation of protein complex assembly	GOBP	0	0	0	0	No
GO:0031334	positive regulation of protein complex assembly	GOBP	0	0	0	0	No
GO:0031338	regulation of vesicle fusion	GOBP	0	0	0	0	No
GO:0031341	regulation of cell killing	GOBP	-0.006	0	0	0	No
GO:0031343	positive regulation of cell killing	GOBP	-0.006	0	0	0	No
GO:0031344	regulation of cell projection organization	GOBP	0	0	0	0	No
GO:0031345	negative regulation of cell projection organization	GOBP	0	0	0	0	No
GO:0031346	positive regulation of cell projection organization	GOBP	0	0	0	0	No
GO:0031347	regulation of defense response	GOBP	-0.001	0	0	0	No
GO:0031348	negative regulation of defense response	GOBP	0	0	0	0	No
GO:0031349	positive regulation of defense response	GOBP	-0.002	0	0	0	No
GO:0031365	N-terminal protein amino acid modification	GOBP	0	0	0	0	No
GO:0031396	regulation of protein ubiquitination	GOBP	0.002	0	0	0	No
GO:0031397	negative regulation of protein ubiquitination	GOBP	0.005	0	0	0	No
GO:0031398	positive regulation of protein ubiquitination	GOBP	0.012	0	0	0	No
GO:0031400	negative regulation of protein modification process	GOBP	0	0	0	0	No
GO:0031401	positive regulation of protein modification process	GOBP	0	0	0	0	No
GO:0031424	keratinization	GOBP	0.004	0	0	0	No
GO:0031440	regulation of mRNA 3'-end processing	GOBP	0	0	0	0	No
GO:0031468	nuclear envelope reassembly	GOBP	0	0	0	0	No
GO:0031503	protein complex localization	GOBP	0	0	0	0	No
GO:0031529	ruffle organization	GOBP	0	0	0	0	No
GO:0031532	actin cytoskeleton reorganization	GOBP	0	0	0	0	No
GO:0031571	mitotic G1 DNA damage checkpoint	GOBP	-0.001	0	0	0	No
GO:0031572	G2 DNA damage checkpoint	GOBP	-0.002	0	0	0	No
GO:0031573	intra-S DNA damage checkpoint	GOBP	0	0	0	0	No
GO:0031579	membrane raft organization	GOBP	0	0	0	0	No
GO:0031589	cell-substrate adhesion	GOBP	0	0	0	0	No
GO:0031623	receptor internalization	GOBP	0	0	0	0	No
GO:0031640	killing of cells of other organism	GOBP	0.001	0	0	0	No
GO:0031641	regulation of myelination	GOBP	0	0	0	0	No
GO:0031644	regulation of neurological system process	GOBP	0	0	0	0	No
GO:0031647	regulation of protein stability	GOBP	0	0	0	0	No
GO:0031648	protein destabilization	GOBP	0	0	0	0	No
GO:0031663	lipopolysaccharide-mediated signaling pathway	GOBP	-0.003	0	0	0	No
GO:0031664	regulation of lipopolysaccharide-mediated signaling pathway	GOBP	0	0	0	0	No
GO:0031667	response to nutrient levels	GOBP	0	0	0	0	No
GO:0031668	cellular response to extracellular stimulus	GOBP	0	0	0	0	No
GO:0031669	cellular response to nutrient levels	GOBP	0	0	0	0	No
GO:0031670	cellular response to nutrient	GOBP	0	0	0	0	No
GO:0031929	TOR signaling	GOBP	0	0	0	0	No
GO:0031935	regulation of chromatin silencing	GOBP	-0.002	0	0	0	No
GO:0031952	regulation of protein autophosphorylation	GOBP	0	0	0	0	No
GO:0031954	positive regulation of protein autophosphorylation	GOBP	0	0	0	0	No
GO:0031960	response to corticosteroid	GOBP	0	0	0	0	No
GO:0032006	regulation of TOR signaling	GOBP	0	0	0	0	No
GO:0032007	negative regulation of TOR signaling	GOBP	0	0	0	0	No
GO:0032008	positive regulation of TOR signaling	GOBP	0	0	0	0	No
GO:0032024	positive regulation of insulin secretion	GOBP	0	0	0	0	No
GO:0032069	regulation of nuclease activity	GOBP	0	0	0	0	No
GO:0032088	negative regulation of NF-kappaB transcription factor activity	GOBP	0	0	0	0	No
GO:0032091	negative regulation of protein binding	GOBP	0	0	0	0	No
GO:0032092	positive regulation of protein binding	GOBP	0	0	0	0	No
GO:0032094	response to food	GOBP	0	0	0	0	No
GO:0032098	regulation of appetite	GOBP	0	0	0	0	No
GO:0032101	regulation of response to external stimulus	GOBP	0	0	0	0	No
GO:0032102	negative regulation of response to external stimulus	GOBP	0	0	0	0	No
GO:0032103	positive regulation of response to external stimulus	GOBP	-0.009	0	0	0	No
GO:0032104	regulation of response to extracellular stimulus	GOBP	0	0	0	0	No
GO:0032107	regulation of response to nutrient levels	GOBP	0	0	0	0	No
GO:0032147	activation of protein kinase activity	GOBP	0	0	0	0	No
GO:0032148	activation of protein kinase B activity	GOBP	0	0	0	0	No
GO:0032196	transposition	GOBP	0	0	0	0	No
GO:0032201	telomere maintenance via semi-conservative replication	GOBP	0.029	0	0	0	No
GO:0032204	regulation of telomere maintenance	GOBP	-0.002	0	0	0	No
GO:0032205	negative regulation of telomere maintenance	GOBP	-0.002	0	0	0	No
GO:0032206	positive regulation of telomere maintenance	GOBP	0.002	0	0	0	No
GO:0032210	regulation of telomere maintenance via telomerase	GOBP	-0.003	0	0	0	No
GO:0032211	negative regulation of telomere maintenance via telomerase	GOBP	0	0	0	0	No
GO:0032212	positive regulation of telomere maintenance via telomerase	GOBP	-0.002	0	0	0	No
GO:0032231	regulation of actin filament bundle assembly	GOBP	0	0	0	0	No
GO:0032232	negative regulation of actin filament bundle assembly	GOBP	0	0	0	0	No
GO:0032233	positive regulation of actin filament bundle assembly	GOBP	0	0	0	0	No
GO:0032259	methylation	GOBP	-0.001	0	0	0	No
GO:0032271	regulation of protein polymerization	GOBP	0	0	0	0	No
GO:0032272	negative regulation of protein polymerization	GOBP	0	0	0	0	No
GO:0032273	positive regulation of protein polymerization	GOBP	0	0	0	0	No
GO:0032309	icosanoid secretion	GOBP	0	0	0	0	No
GO:0032330	regulation of chondrocyte differentiation	GOBP	0	0	0	0	No
GO:0032350	regulation of hormone metabolic process	GOBP	0	0	0	0	No
GO:0032355	response to estradiol	GOBP	0	0	0	0	No
GO:0032365	intracellular lipid transport	GOBP	0.001	0	0	0	No
GO:0032366	intracellular sterol transport	GOBP	0	0	0	0	No
GO:0032367	intracellular cholesterol transport	GOBP	0	0	0	0	No
GO:0032370	positive regulation of lipid transport	GOBP	0	0	0	0	No
GO:0032386	regulation of intracellular transport	GOBP	0	0	0	0	No
GO:0032387	negative regulation of intracellular transport	GOBP	0	0	0	0	No
GO:0032388	positive regulation of intracellular transport	GOBP	0	0	0	0	No
GO:0032392	DNA geometric change	GOBP	0.016	0	0	0	No
GO:0032400	melanosome localization	GOBP	0	0	0	0	No
GO:0032401	establishment of melanosome localization	GOBP	0	0	0	0	No
GO:0032402	melanosome transport	GOBP	0	0	0	0	No
GO:0032409	regulation of transporter activity	GOBP	0	0	0	0	No
GO:0032410	negative regulation of transporter activity	GOBP	0	0	0	0	No
GO:0032411	positive regulation of transporter activity	GOBP	0	0	0	0	No
GO:0032412	regulation of ion transmembrane transporter activity	GOBP	0	0	0	0	No
GO:0032413	negative regulation of ion transmembrane transporter activity	GOBP	0	0	0	0	No
GO:0032414	positive regulation of ion transmembrane transporter activity	GOBP	0	0	0	0	No
GO:0032418	lysosome localization	GOBP	0	0	0	0	No
GO:0032434	regulation of proteasomal ubiquitin-dependent protein catabolic process	GOBP	0	0	0	0	No
GO:0032435	negative regulation of proteasomal ubiquitin-dependent protein catabolic process	GOBP	-0.003	0	0	0	No
GO:0032436	positive regulation of proteasomal ubiquitin-dependent protein catabolic process	GOBP	0	0	0	0	No
GO:0032438	melanosome organization	GOBP	0.002	0	0	0	No
GO:0032446	protein modification by small protein conjugation	GOBP	-0.002	0	0	0	No
GO:0032456	endocytic recycling	GOBP	0	0	0	0	No
GO:0032459	regulation of protein oligomerization	GOBP	0	0	0	0	No
GO:0032462	regulation of protein homooligomerization	GOBP	0	0	0	0	No
GO:0032465	regulation of cytokinesis	GOBP	0	0	0	0	No
GO:0032467	positive regulation of cytokinesis	GOBP	0	0	0	0	No
GO:0032469	endoplasmic reticulum calcium ion homeostasis	GOBP	0	0	0	0	No
GO:0032479	regulation of type I interferon production	GOBP	-0.005	0	0	0	No
GO:0032480	negative regulation of type I interferon production	GOBP	-0.004	0	0	0	No
GO:0032481	positive regulation of type I interferon production	GOBP	-0.001	0	0	0	No
GO:0032504	multicellular organism reproduction	GOBP	0	0	0	0	No
GO:0032506	cytokinetic process	GOBP	0	0	0	0	No
GO:0032507	maintenance of protein location in cell	GOBP	0	0	0	0	No
GO:0032508	DNA duplex unwinding	GOBP	0.009	0	0	0	No
GO:0032509	endosome transport via multivesicular body sorting pathway	GOBP	0.002	0	0	0	No
GO:0032515	negative regulation of phosphoprotein phosphatase activity	GOBP	0	0	0	0	No
GO:0032526	response to retinoic acid	GOBP	0	0	0	0	No
GO:0032527	protein exit from endoplasmic reticulum	GOBP	-0.001	0	0	0	No
GO:0032535	regulation of cellular component size	GOBP	0	0	0	0	No
GO:0032570	response to progesterone	GOBP	0	0	0	0	No
GO:0032602	chemokine production	GOBP	0	0	0	0	No
GO:0032606	type I interferon production	GOBP	-0.005	0	0	0	No
GO:0032607	interferon-alpha production	GOBP	0.001	0	0	0	No
GO:0032608	interferon-beta production	GOBP	-0.001	0	0	0	No
GO:0032611	interleukin-1 beta production	GOBP	-0.001	0	0	0	No
GO:0032612	interleukin-1 production	GOBP	-0.001	0	0	0	No
GO:0032613	interleukin-10 production	GOBP	-0.005	0	0	0	No
GO:0032615	interleukin-12 production	GOBP	-0.003	0	0	0	No
GO:0032620	interleukin-17 production	GOBP	-0.005	0	0	0	No
GO:0032623	interleukin-2 production	GOBP	-0.003	0	0	0	No
GO:0032633	interleukin-4 production	GOBP	-0.003	0	0	0	No
GO:0032635	interleukin-6 production	GOBP	-0.002	0	0	0	No
GO:0032637	interleukin-8 production	GOBP	-0.001	0	0	0	No
[truncated: 4,889 more rows]
