# Supplementary material for: Identifying gene function and module connections by the integration of multispecies expression compendia
Source: HighWire-hosted journal article supplement (doi:10.1101/gr.251983.119), 2019-11-21
Supplement: Supplemental_Table_S4.xlsx [file Supplemental_Table_S4.xlsx]

## Sheet: human_gene_6529_SLC6A1_brain_vs
Supplemental Table S4. Tissue-specific association of SLC6A1 in brain and liver tissues in humans.
Modules			G-MAD results
Module ID	Module name	Module Source	All tissues	Brain	Liver	Difference (brain vs liver)	Gene present in the module
Reactome_R-HSA-112310	Neurotransmitter release cycle	Reactome	0.26	0.663267	0.0424417	0.620826	Yes
Reactome_R-HSA-112315	Transmission across Chemical Synapses	Reactome	0.149	0.608405	0	0.608405	Yes
GOBP_GO:0007215	glutamate receptor signaling pathway	GOBP	0.11	0.57265	0	0.57265	No
Reactome_R-HSA-888590	GABA synthesis, release, reuptake and degradation	Reactome	0.556	0.927936	0.373878	0.554057	Yes
Reactome_R-HSA-112316	Neuronal System	Reactome	0.143	0.538575	0	0.538575	Yes
GOCC_GO:0098984	neuron to neuron synapse	GOCC	0.1	0.497375	0	0.497375	No
GOCC_GO:0032279	asymmetric synapse	GOCC	0.099	0.495854	0	0.495854	No
GOCC_GO:0014069	postsynaptic density	GOCC	0.089	0.46035	0	0.46035	No
GOCC_GO:0099572	postsynaptic specialization	GOCC	0.089	0.46035	0	0.46035	No
GOCC_GO:0008328	ionotropic glutamate receptor complex	GOCC	0.084	0.450387	0	0.450387	No
Reactome_R-HSA-6794362	Protein-protein interactions at synapses	Reactome	0.106	0.44856	0	0.44856	No
GOBP_GO:0050804	modulation of chemical synaptic transmission	GOBP	0.1	0.432756	0	0.432756	No
GOCC_GO:0030425	dendrite	GOCC	0.106	0.421059	0	0.421059	No
GOCC_GO:0036477	somatodendritic compartment	GOCC	0.104	0.406704	0	0.406704	No
GOBP_GO:0007268	chemical synaptic transmission	GOBP	0.109	0.402749	0	0.402749	Yes
GOBP_GO:0098916	anterograde trans-synaptic signaling	GOBP	0.109	0.402749	0	0.402749	Yes
GOBP_GO:0099536	synaptic signaling	GOBP	0.109	0.402749	0	0.402749	Yes
GOBP_GO:0099537	trans-synaptic signaling	GOBP	0.109	0.402749	0	0.402749	Yes
GOCC_GO:0098794	postsynapse	GOCC	0.082	0.394991	0	0.394991	No
GOCC_GO:0098878	neurotransmitter receptor complex	GOCC	0.078	0.392688	0	0.392688	No
Reactome_R-HSA-6794361	Neurexins and neuroligins	Reactome	0.085	0.390598	0	0.390598	No
GOBP_GO:0048813	dendrite morphogenesis	GOBP	0.069	0.377708	0	0.377708	No
Reactome_R-HSA-3560783	Defective B4GALT7 causes EDS, progeroid type	Reactome	0.065	0.376514	0	0.376514	No
GOMF_GO:0008066	glutamate receptor activity	GOMF	0.083	0.374498	0	0.374498	No
GOCC_GO:0097060	synaptic membrane	GOCC	0.068	0.373413	0	0.373413	No
GOCC_GO:0045202	synapse	GOCC	0.101	0.37248	0	0.37248	No
GOCC_GO:0034703	cation channel complex	GOCC	0.09	0.3653	0	0.3653	No
Reactome_R-HSA-4420332	Defective B3GALT6 causes EDSP2 and SEMDJL1	Reactome	0.061	0.363705	0	0.363705	No
GOCC_GO:0044456	synapse part	GOCC	0.1	0.360779	0	0.360779	No
GOMF_GO:0004970	ionotropic glutamate receptor activity	GOMF	0.057	0.3602	0	0.3602	No
GOCC_GO:0030424	axon	GOCC	0.089	0.357977	0	0.357977	No
GOBP_GO:1900449	regulation of glutamate receptor signaling pathway	GOBP	0.055	0.357671	0	0.357671	No
Reactome_R-HSA-399719	Trafficking of AMPA receptors	Reactome	0.064	0.356681	0	0.356681	No
Reactome_R-HSA-399721	Glutamate binding, activation of AMPA receptors and synaptic plasticity	Reactome	0.064	0.356681	0	0.356681	No
GOMF_GO:0005416	cation:amino acid symporter activity	GOMF	0.65	0.850661	0.494223	0.356438	Yes
Reactome_R-HSA-5578775	Ion homeostasis	Reactome	0.046	0.356127	0	0.356127	No
Reactome_R-HSA-112314	Neurotransmitter receptors and postsynaptic signal transmission	Reactome	0.071	0.354257	0	0.354257	No
Reactome_R-HSA-1971475	A tetrasaccharide linker sequence is required for GAG synthesis	Reactome	0.045	0.351876	0	0.351876	No
GOBP_GO:0099601	regulation of neurotransmitter receptor activity	GOBP	0.046	0.333081	0	0.333081	No
GOBP_GO:0050808	synapse organization	GOBP	0.061	0.332327	0	0.332327	No
GOCC_GO:0034702	ion channel complex	GOCC	0.079	0.331829	0	0.331829	No
Reactome_R-HSA-3560801	Defective B3GAT3 causes JDSSDHD	Reactome	0.062	0.33088	0	0.33088	No
GOMF_GO:0015081	sodium ion transmembrane transporter activity	GOMF	0.105	0.330373	0	0.330373	Yes
GOMF_GO:0005343	organic acid:sodium symporter activity	GOMF	0.463	0.591834	0.267353	0.324481	Yes
GOBP_GO:0035637	multicellular organismal signaling	GOBP	0.051	0.320027	0	0.320027	No
GOCC_GO:0097458	neuron part	GOCC	0.08	0.318643	0	0.318643	Yes
GOBP_GO:0048167	regulation of synaptic plasticity	GOBP	0.071	0.315975	0	0.315975	No
GOBP_GO:0098815	modulation of excitatory postsynaptic potential	GOBP	0.048	0.314653	0	0.314653	No
Reactome_R-HSA-438066	Unblocking of NMDA receptor, glutamate binding and activation	Reactome	0.052	0.31248	0	0.31248	No
GOBP_GO:2000463	positive regulation of excitatory postsynaptic potential	GOBP	0.053	0.307393	0	0.307393	No
GOBP_GO:0007611	learning or memory	GOBP	0.052	0.307127	0	0.307127	No
GOBP_GO:0048168	regulation of neuronal synaptic plasticity	GOBP	0.055	0.304878	0	0.304878	No
GOCC_GO:0043025	neuronal cell body	GOCC	0.062	0.304674	0	0.304674	No
GOMF_GO:0015296	anion:cation symporter activity	GOMF	0.228	0.39085	0.0893815	0.301468	Yes
GOCC_GO:0044304	main axon	GOCC	0.051	0.299766	0	0.299766	No
GOCC_GO:0043005	neuron projection	GOCC	0.069	0.293631	0	0.293631	Yes
GOCC_GO:0032281	AMPA glutamate receptor complex	GOCC	0.059	0.293477	0	0.293477	No
GOBP_GO:0061337	cardiac conduction	GOBP	0.043	0.289617	0	0.289617	No
GOBP_GO:0016358	dendrite development	GOBP	0.062	0.287166	0	0.287166	No
GOBP_GO:0045664	regulation of neuron differentiation	GOBP	0.047	0.271773	0	0.271773	No
GOBP_GO:0010975	regulation of neuron projection development	GOBP	0.051	0.271441	0	0.271441	No
GOMF_GO:0035254	glutamate receptor binding	GOMF	0.034	0.271272	0	0.271272	No
GOCC_GO:0098793	presynapse	GOCC	0.067	0.269503	0	0.269503	No
GOBP_GO:2000311	regulation of AMPA receptor activity	GOBP	0.045	0.269428	0	0.269428	No
GOBP_GO:0001505	regulation of neurotransmitter levels	GOBP	0.062	0.267464	0	0.267464	No
Reactome_R-HSA-3000178	ECM proteoglycans	Reactome	0.24	0.245688	-0.0208033	0.266492	No
Reactome_R-HSA-442755	Activation of NMDA receptor and postsynaptic events	Reactome	0.043	0.264383	0	0.264383	No
GOCC_GO:0044297	cell body	GOCC	0.049	0.264212	0	0.264212	No
GOBP_GO:0048667	cell morphogenesis involved in neuron differentiation	GOBP	0.047	0.262446	0	0.262446	No
GOCC_GO:0033267	axon part	GOCC	0.055	0.261845	0	0.261845	No
GOCC_GO:1902495	transmembrane transporter complex	GOCC	0.057	0.260542	0	0.260542	No
GOBP_GO:0050767	regulation of neurogenesis	GOBP	0.042	0.259413	0	0.259413	No
GOBP_GO:0048812	neuron projection morphogenesis	GOBP	0.049	0.258213	0	0.258213	No
KEGG_04970	Salivary secretion	KEGG	0.027	0.250266	0	0.250266	No
GOBP_GO:0001508	action potential	GOBP	0.039	0.249995	0	0.249995	No
KEGG_04971	Gastric acid secretion	KEGG	0.026	0.248379	0	0.248379	No
GOBP_GO:0035176	social behavior	GOBP	0.029	0.245321	0	0.245321	No
GOBP_GO:0051703	intraspecies interaction between organisms	GOBP	0.029	0.245321	0	0.245321	No
GOBP_GO:0007269	neurotransmitter secretion	GOBP	0.058	0.244835	0	0.244835	No
GOBP_GO:0099643	signal release from synapse	GOBP	0.058	0.244835	0	0.244835	No
GOBP_GO:0050773	regulation of dendrite development	GOBP	0.043	0.243329	0	0.243329	No
GOBP_GO:0050770	regulation of axonogenesis	GOBP	0.036	0.242246	0	0.242246	No
GOBP_GO:0086010	membrane depolarization during action potential	GOBP	0.032	0.24209	0	0.24209	No
GOMF_GO:0099604	ligand-gated calcium channel activity	GOMF	0.022	0.238697	0	0.238697	No
GOBP_GO:0010644	cell communication by electrical coupling	GOBP	0.022	0.238588	0	0.238588	No
GOBP_GO:0032990	cell part morphogenesis	GOBP	0.043	0.238312	0	0.238312	No
GOBP_GO:0045666	positive regulation of neuron differentiation	GOBP	0.036	0.237892	0	0.237892	No
GOBP_GO:0048858	cell projection morphogenesis	GOBP	0.042	0.236156	0	0.236156	No
GOBP_GO:0120039	plasma membrane bounded cell projection morphogenesis	GOBP	0.042	0.236058	0	0.236058	No
GOBP_GO:0048588	developmental cell growth	GOBP	0.032	0.230214	0	0.230214	No
GOBP_GO:0060079	excitatory postsynaptic potential	GOBP	0.04	0.229641	0	0.229641	No
KEGG_05323	Rheumatoid arthritis	KEGG	-0.015	-0.0259024	-0.25476	0.228857	No
GOBP_GO:0006836	neurotransmitter transport	GOBP	0.054	0.228089	0	0.228089	No
GOBP_GO:0010769	regulation of cell morphogenesis involved in differentiation	GOBP	0.031	0.225123	0	0.225123	No
GOBP_GO:0010976	positive regulation of neuron projection development	GOBP	0.039	0.223888	0	0.223888	No
Reactome_R-HSA-5576891	Cardiac conduction	Reactome	0.038	0.220833	0	0.220833	No
KEGG_04020	Calcium signaling pathway	KEGG	0.03	0.216623	0	0.216623	No
GOBP_GO:0051960	regulation of nervous system development	GOBP	0.036	0.216498	0	0.216498	No
Reactome_R-HSA-442982	Ras activation uopn Ca2+ infux through NMDA receptor	Reactome	0.037	0.215989	0	0.215989	No
GOCC_GO:0042383	sarcolemma	GOCC	0.021	0.215536	0	0.215536	No
GOCC_GO:0005925	focal adhesion	GOCC	0.007	0.0907876	-0.124701	0.215489	No
GOBP_GO:0051962	positive regulation of nervous system development	GOBP	0.035	0.214196	0	0.214196	No
GOBP_GO:0006813	potassium ion transport	GOBP	0.038	0.212232	0	0.212232	No
GOBP_GO:1903779	regulation of cardiac conduction	GOBP	0.025	0.209847	0	0.209847	No
GOBP_GO:0010640	regulation of platelet-derived growth factor receptor signaling pathway	GOBP	0.016	0.208582	0	0.208582	No
GOBP_GO:0086012	membrane depolarization during cardiac muscle cell action potential	GOBP	0.024	0.207905	0	0.207905	No
Reactome_R-HSA-977443	GABA receptor activation	Reactome	0.035	0.204859	0	0.204859	No
GOBP_GO:0071804	cellular potassium ion transport	GOBP	0.044	0.204307	0	0.204307	No
GOBP_GO:0071805	potassium ion transmembrane transport	GOBP	0.044	0.204307	0	0.204307	No
GOCC_GO:0045211	postsynaptic membrane	GOCC	0.029	0.204306	0	0.204306	No
GOCC_GO:0008076	voltage-gated potassium channel complex	GOCC	0.054	0.203321	0	0.203321	No
GOCC_GO:0034705	potassium channel complex	GOCC	0.053	0.203021	0	0.203021	No
GOBP_GO:0086064	cell communication by electrical coupling involved in cardiac conduction	GOBP	0.018	0.200938	0	0.200938	No
Reactome_R-HSA-8849932	Synaptic adhesion-like molecules	Reactome	0.026	0.200709	0	0.200709	No
GOBP_GO:0050769	positive regulation of neurogenesis	GOBP	0.03	0.199618	0	0.199618	No
GOMF_GO:0015171	amino acid transmembrane transporter activity	GOMF	0.104	0.199378	0	0.199378	Yes
GOBP_GO:0060078	regulation of postsynaptic membrane potential	GOBP	0.029	0.19935	0	0.19935	No
GOBP_GO:0099565	chemical synaptic transmission, postsynaptic	GOBP	0.029	0.19935	0	0.19935	No
GOBP_GO:0060560	developmental growth involved in morphogenesis	GOBP	0.027	0.198184	0	0.198184	No
GOBP_GO:0007612	learning	GOBP	0.033	0.197662	0	0.197662	No
GOCC_GO:0048786	presynaptic active zone	GOCC	0.033	0.196229	0	0.196229	No
Reactome_R-HSA-438064	Post NMDA receptor activation events	Reactome	0.028	0.194359	0	0.194359	No
GOCC_GO:0005578	proteinaceous extracellular matrix	GOCC	0.21	0.172562	-0.0174337	0.189996	No
GOBP_GO:0050806	positive regulation of synaptic transmission	GOBP	0.031	0.189969	0	0.189969	No
GOBP_GO:0006027	glycosaminoglycan catabolic process	GOBP	0.05	0.188899	0	0.188899	No
GOCC_GO:0030055	cell-substrate junction	GOCC	0.003	0.0638935	-0.124409	0.188302	No
GOCC_GO:0005924	cell-substrate adherens junction	GOCC	0.005	0.0634229	-0.124094	0.187517	No
GOBP_GO:0050853	B cell receptor signaling pathway	GOBP	-0.058	0	-0.183246	0.183246	No
GOMF_GO:0005244	voltage-gated ion channel activity	GOMF	0.074	0.182864	0	0.182864	No
GOMF_GO:0022832	voltage-gated channel activity	GOMF	0.074	0.182864	0	0.182864	No
GOBP_GO:0031175	neuron projection development	GOBP	0.036	0.182841	0	0.182841	No
GOBP_GO:0050890	cognition	GOBP	0.029	0.182534	0	0.182534	No
GOBP_GO:0048666	neuron development	GOBP	0.037	0.182003	0	0.182003	No
GOBP_GO:0086065	cell communication involved in cardiac conduction	GOBP	0.023	0.181255	0	0.181255	No
GOCC_GO:0043202	lysosomal lumen	GOCC	0.029	0.179302	0	0.179302	No
GOBP_GO:0050803	regulation of synapse structure or activity	GOBP	0.028	0.17885	0	0.17885	No
GOBP_GO:0050807	regulation of synapse organization	GOBP	0.024	0.175234	0	0.175234	No
GOBP_GO:0010720	positive regulation of cell development	GOBP	0.025	0.175192	0	0.175192	No
GOBP_GO:0035249	synaptic transmission, glutamatergic	GOBP	0.034	0.174463	0	0.174463	No
GOBP_GO:0051966	regulation of synaptic transmission, glutamatergic	GOBP	0.03	0.173741	0	0.173741	No
GOBP_GO:0061564	axon development	GOBP	0.031	0.173128	0	0.173128	No
GOBP_GO:0001941	postsynaptic membrane organization	GOBP	0.021	0.172067	0	0.172067	No
GOMF_GO:0022853	active ion transmembrane transporter activity	GOMF	0.043	0.171785	0	0.171785	Yes
GOBP_GO:0007409	axonogenesis	GOBP	0.03	0.17105	0	0.17105	No
KEGG_04510	Focal adhesion	KEGG	0.103	0.118158	-0.0525805	0.170738	No
GOCC_GO:1990351	transporter complex	GOCC	0.042	0.169832	0	0.169832	No
Reactome_R-HSA-1638091	Heparan sulfate/heparin (HS-GAG) metabolism	Reactome	0.021	0.168269	0	0.168269	No
GOBP_GO:0051705	multi-organism behavior	GOBP	0.019	0.167389	0	0.167389	No
GOBP_GO:0031344	regulation of cell projection organization	GOBP	0.026	0.167	0	0.167	No
GOBP_GO:0007416	synapse assembly	GOBP	0.043	0.166457	0	0.166457	No
KEGG_04070	Phosphatidylinositol signaling system	KEGG	0.015	0.166304	0	0.166304	No
Reactome_R-HSA-442729	CREB phosphorylation through the activation of CaMKII	Reactome	0.03	0.164979	0	0.164979	No
GOMF_GO:0046873	metal ion transmembrane transporter activity	GOMF	0.056	0.164887	0	0.164887	Yes
GOBP_GO:0032412	regulation of ion transmembrane transporter activity	GOBP	0.024	0.164433	0	0.164433	No
GOBP_GO:0032409	regulation of transporter activity	GOBP	0.023	0.163827	0	0.163827	No
GOBP_GO:0031346	positive regulation of cell projection organization	GOBP	0.024	0.16292	0	0.16292	No
GOMF_GO:0015370	solute:sodium symporter activity	GOMF	0.256	0.250421	0.0891317	0.161289	Yes
GOBP_GO:0022898	regulation of transmembrane transporter activity	GOBP	0.023	0.16126	0	0.16126	No
GOBP_GO:0006029	proteoglycan metabolic process	GOBP	0.055	0.161259	0	0.161259	No
Reactome_R-HSA-114508	Effects of PIP2 hydrolysis	Reactome	0.013	0.158486	0	0.158486	No
GOBP_GO:0042391	regulation of membrane potential	GOBP	0.023	0.157123	0	0.157123	No
GOBP_GO:0048814	regulation of dendrite morphogenesis	GOBP	0.022	0.156385	0	0.156385	No
GOBP_GO:0099531	presynaptic process involved in chemical synaptic transmission	GOBP	0.041	0.155604	0	0.155604	No
GOBP_GO:0051249	regulation of lymphocyte activation	GOBP	-0.048	-0.0355525	-0.190859	0.155306	No
GOMF_GO:0022836	gated channel activity	GOMF	0.082	0.154648	0	0.154648	No
GOBP_GO:0051251	positive regulation of lymphocyte activation	GOBP	-0.062	-0.0346473	-0.188731	0.154084	No
GOBP_GO:0030204	chondroitin sulfate metabolic process	GOBP	0.051	0.153013	0	0.153013	No
KEGG_04540	Gap junction	KEGG	0.014	0.152941	0	0.152941	No
GOBP_GO:0120035	regulation of plasma membrane bounded cell projection organization	GOBP	0.024	0.152861	0	0.152861	No
GOBP_GO:0045216	cell-cell junction organization	GOBP	0.05	0.152696	0	0.152696	No
GOBP_GO:0051899	membrane depolarization	GOBP	0.022	0.151847	0	0.151847	No
GOMF_GO:0022843	voltage-gated cation channel activity	GOMF	0.075	0.151132	0	0.151132	No
GOBP_GO:0086001	cardiac muscle cell action potential	GOBP	0.02	0.150975	0	0.150975	No
GOBP_GO:0010882	regulation of cardiac muscle contraction by calcium ion signaling	GOBP	0.012	0.150951	0	0.150951	No
GOBP_GO:0046649	lymphocyte activation	GOBP	-0.05	-0.01464	-0.164309	0.149669	No
GOBP_GO:0007159	leukocyte cell-cell adhesion	GOBP	-0.052	-0.0337393	-0.183345	0.149606	No
GOBP_GO:0021879	forebrain neuron differentiation	GOBP	0.019	0.149398	0	0.149398	No
Reactome_R-HSA-3000171	Non-integrin membrane-ECM interactions	Reactome	0.208	0.158237	0.0103005	0.147936	No
Reactome_R-HSA-1793185	Chondroitin sulfate/dermatan sulfate metabolism	Reactome	0.074	0.147744	0	0.147744	No
Reactome_R-HSA-3000157	Laminin interactions	Reactome	0.207	0.120277	-0.0269416	0.147219	No
GOBP_GO:0043062	extracellular structure organization	GOBP	0.254	0.104415	-0.0424687	0.146884	No
GOBP_GO:0030198	extracellular matrix organization	GOBP	0.258	0.104329	-0.042532	0.146861	No
GOMF_GO:0015079	potassium ion transmembrane transporter activity	GOMF	0.055	0.146761	0	0.146761	No
GOBP_GO:0071621	granulocyte chemotaxis	GOBP	0.001	0	-0.145625	0.145625	No
GOBP_GO:1990266	neutrophil migration	GOBP	-0.003	0	-0.145406	0.145406	No
GOBP_GO:0042110	T cell activation	GOBP	-0.054	-0.0146559	-0.159371	0.144715	No
GOBP_GO:0030593	neutrophil chemotaxis	GOBP	-0.002	0	-0.144334	0.144334	No
GOBP_GO:0060284	regulation of cell development	GOBP	0.024	0.144112	0	0.144112	No
Reactome_R-HSA-977444	GABA B receptor activation	Reactome	0.017	0.142013	0	0.142013	No
Reactome_R-HSA-991365	Activation of GABAB receptors	Reactome	0.017	0.142013	0	0.142013	No
GOBP_GO:0097529	myeloid leukocyte migration	GOBP	0.002	-0.00755817	-0.149473	0.141915	No
GOBP_GO:0051588	regulation of neurotransmitter transport	GOBP	0.022	0.140425	0	0.140425	No
GOBP_GO:0060997	dendritic spine morphogenesis	GOBP	0.025	0.13987	0	0.13987	No
Reactome_R-HSA-416993	Trafficking of GluR2-containing AMPA receptors	Reactome	0.025	0.139415	0	0.139415	No
Reactome_R-HSA-3560782	Diseases associated with glycosaminoglycan metabolism	Reactome	0.073	0.137538	0	0.137538	No
GOBP_GO:0046928	regulation of neurotransmitter secretion	GOBP	0.024	0.137527	0	0.137527	No
GOBP_GO:0000902	cell morphogenesis	GOBP	0.021	0.137417	0	0.137417	No
GOBP_GO:0072012	glomerulus vasculature development	GOBP	0.152	0.136165	0	0.136165	No
Reactome_R-HSA-8866910	TFAP2 (AP-2) family regulates transcription of growth factors and their receptors	Reactome	0.011	0.135548	0	0.135548	No
GOBP_GO:0050654	chondroitin sulfate proteoglycan metabolic process	GOBP	0.043	0.134054	0	0.134054	No
GOBP_GO:0002694	regulation of leukocyte activation	GOBP	-0.044	-0.0596311	-0.193631	0.134	No
GOBP_GO:0022604	regulation of cell morphogenesis	GOBP	0.016	0.133574	0	0.133574	No
Reactome_R-HSA-194840	Rho GTPase cycle	Reactome	0.019	0.132349	0	0.132349	No
GOBP_GO:0034332	adherens junction organization	GOBP	0.046	0.131657	0	0.131657	No
GOBP_GO:0000904	cell morphogenesis involved in differentiation	GOBP	0.021	0.131219	0	0.131219	No
GOCC_GO:0042734	presynaptic membrane	GOCC	0.026	0.131166	0	0.131166	No
GOBP_GO:0008016	regulation of heart contraction	GOBP	0.021	0.13072	0	0.13072	No
GOBP_GO:0060326	cell chemotaxis	GOBP	0.01	0	-0.130405	0.130405	No
Reactome_R-HSA-442742	CREB phosphorylation through the activation of Ras	Reactome	0.017	0.130238	0	0.130238	No
GOMF_GO:0005088	Ras guanyl-nucleotide exchange factor activity	GOMF	0.013	0.129267	0	0.129267	No
GOBP_GO:0030595	leukocyte chemotaxis	GOBP	0.007	0	-0.125518	0.125518	No
GOCC_GO:0044291	cell-cell contact zone	GOCC	0.01	0.125336	0	0.125336	No
Reactome_R-HSA-8874081	MET activates PTK2 signaling	Reactome	0.183	0.103194	-0.0206999	0.123894	No
GOMF_GO:0099094	ligand-gated cation channel activity	GOMF	0.034	0.122177	0	0.122177	No
KEGG_04940	Type I diabetes mellitus	KEGG	-0.053	0.00102419	-0.120866	0.12189	No
GOBP_GO:0022618	ribonucleoprotein complex assembly	GOBP	-0.095	-0.0232988	-0.144746	0.121447	No
Reactome_R-HSA-388844	Receptor-type tyrosine-protein phosphatases	Reactome	0.018	0.121175	0	0.121175	No
GOBP_GO:0060996	dendritic spine development	GOBP	0.026	0.121113	0	0.121113	No
GOBP_GO:0030166	proteoglycan biosynthetic process	GOBP	0.039	0.121104	0	0.121104	No
GOBP_GO:0061437	renal system vasculature development	GOBP	0.142	0.120951	0	0.120951	No
GOBP_GO:0061440	kidney vasculature development	GOBP	0.142	0.120951	0	0.120951	No
GOBP_GO:0097530	granulocyte migration	GOBP	-0.001	-0.0278247	-0.148683	0.120858	No
Reactome_R-HSA-5576892	Phase 0 - rapid depolarisation	Reactome	0.026	0.119907	0	0.119907	No
Reactome_R-HSA-1489509	DAG and IP3 signaling	Reactome	0.012	0.119715	0	0.119715	No
Reactome_R-HSA-1296071	Potassium Channels	Reactome	0.042	0.119358	0	0.119358	No
GOCC_GO:0044309	neuron spine	GOCC	0.019	0.118409	0	0.118409	No
Reactome_R-HSA-1630316	Glycosaminoglycan metabolism	Reactome	0.033	0.118398	0	0.118398	No
GOBP_GO:0034330	cell junction organization	GOBP	0.05	0.117816	0	0.117816	No
GOBP_GO:0051056	regulation of small GTPase mediated signal transduction	GOBP	0.012	0.117693	0	0.117693	No
GOBP_GO:0051965	positive regulation of synapse assembly	GOBP	0.015	0.117521	0	0.117521	No
GOBP_GO:0002181	cytoplasmic translation	GOBP	-0.067	-0.0379299	-0.154734	0.116804	No
GOBP_GO:0032835	glomerulus development	GOBP	0.09	0.116677	0	0.116677	No
GOBP_GO:0019226	transmission of nerve impulse	GOBP	0.017	0.116171	0	0.116171	No
GOBP_GO:0010632	regulation of epithelial cell migration	GOBP	0.021	0.115996	0	0.115996	No
Reactome_R-HSA-181429	Serotonin Neurotransmitter Release Cycle	Reactome	0.026	0.115964	0	0.115964	No
GOBP_GO:0017158	regulation of calcium ion-dependent exocytosis	GOBP	0.022	0.115629	0	0.115629	No
GOBP_GO:0050655	dermatan sulfate proteoglycan metabolic process	GOBP	0.033	0.115072	0	0.115072	No
GOBP_GO:0030336	negative regulation of cell migration	GOBP	0.026	0.114979	0	0.114979	No
GOBP_GO:0034765	regulation of ion transmembrane transport	GOBP	0.019	0.114931	0	0.114931	No
KEGG_05332	Graft-versus-host disease	KEGG	-0.077	-0.0462867	-0.160969	0.114682	No
Reactome_R-HSA-8948216	Collagen chain trimerization	Reactome	0.246	0.0935964	-0.0200929	0.113689	No
GOBP_GO:0034333	adherens junction assembly	GOBP	0.052	0.113437	0	0.113437	No
GOMF_GO:0015085	calcium ion transmembrane transporter activity	GOMF	0.014	0.11329	0	0.11329	No
Reactome_R-HSA-6790901	rRNA modification in the nucleus and cytosol	Reactome	-0.122	-0.269165	-0.382381	0.113216	No
GOBP_GO:0002696	positive regulation of leukocyte activation	GOBP	-0.052	-0.0546337	-0.166911	0.112277	No
GOBP_GO:0000375	RNA splicing, via transesterification reactions	GOBP	-0.102	0.0521637	-0.0599492	0.112113	No
GOBP_GO:0000377	RNA splicing, via transesterification reactions with bulged adenosine as nucleophile	GOBP	-0.099	0.0524062	-0.0596998	0.112106	No
GOBP_GO:0000398	mRNA splicing, via spliceosome	GOBP	-0.099	0.0524062	-0.0596998	0.112106	No
Reactome_R-HSA-418346	Platelet homeostasis	Reactome	0.012	0.11086	0	0.11086	No
GOBP_GO:0050867	positive regulation of cell activation	GOBP	-0.055	-0.0590185	-0.168009	0.108991	No
GOBP_GO:0006865	amino acid transport	GOBP	0.069	0.108629	0	0.108629	Yes
GOBP_GO:2001257	regulation of cation channel activity	GOBP	0.016	0.108167	0	0.108167	No
Reactome_R-HSA-392154	Nitric oxide stimulates guanylate cyclase	Reactome	0.044	0.108148	0	0.108148	No
GOBP_GO:0010107	potassium ion import	GOBP	0.013	0.107136	0	0.107136	No
GOBP_GO:0006026	aminoglycan catabolic process	GOBP	0.026	0.106318	0	0.106318	No
GOBP_GO:0010718	positive regulation of epithelial to mesenchymal transition	GOBP	0.012	0.0491385	-0.0571621	0.106301	No
GOBP_GO:0010594	regulation of endothelial cell migration	GOBP	0.052	0.105106	0	0.105106	No
GOBP_GO:1900006	positive regulation of dendrite development	GOBP	0.016	0.104342	0	0.104342	No
GOBP_GO:0002028	regulation of sodium ion transport	GOBP	0.01	0.104137	0	0.104137	No
Reactome_R-HSA-72172	mRNA Splicing	Reactome	-0.128	-0.0266774	-0.129646	0.102968	No
GOMF_GO:0023023	MHC protein complex binding	GOMF	-0.013	0	-0.101417	0.101417	No
Reactome_R-HSA-379716	Cytosolic tRNA aminoacylation	Reactome	-0.042	-0.083271	-0.184468	0.101197	No
Reactome_R-HSA-72163	mRNA Splicing - Major Pathway	Reactome	-0.131	-0.0283282	-0.129302	0.100974	No
Reactome_R-HSA-1912408	Pre-NOTCH Transcription and Translation	Reactome	0.014	0.100812	0	0.100812	No
Reactome_R-HSA-202433	Generation of second messenger molecules	Reactome	-0.07	-0.0270929	-0.127874	0.100781	No
GOBP_GO:0010631	epithelial cell migration	GOBP	0.033	0.100614	0	0.100614	No
GOBP_GO:0043542	endothelial cell migration	GOBP	0.09	0.100598	0	0.100598	No
GOBP_GO:0034329	cell junction assembly	GOBP	0.049	0.100293	0	0.100293	No
GOMF_GO:0005245	voltage-gated calcium channel activity	GOMF	0.028	0.0999465	0	0.0999465	No
GOBP_GO:0090132	epithelium migration	GOBP	0.033	0.0999016	0	0.0999016	No
GOBP_GO:0090130	tissue migration	GOBP	0.039	0.0994834	0	0.0994834	No
GOCC_GO:0098589	membrane region	GOCC	0.01	0.0992054	0	0.0992054	No
GOBP_GO:0071826	ribonucleoprotein complex subunit organization	GOBP	-0.086	-0.022738	-0.121763	0.0990248	No
GOCC_GO:0043197	dendritic spine	GOCC	0.017	0.0989851	0	0.0989851	No
Reactome_R-HSA-1474244	Extracellular matrix organization	Reactome	0.218	0.0853043	-0.0133506	0.0986549	No
GOBP_GO:1903514	release of sequestered calcium ion into cytosol by endoplasmic reticulum	GOBP	0.007	0.0986473	0	0.0986473	No
GOBP_GO:1903037	regulation of leukocyte cell-cell adhesion	GOBP	-0.047	-0.0341961	-0.132728	0.0985317	No
GOMF_GO:0015276	ligand-gated ion channel activity	GOMF	0.044	0.0980976	0	0.0980976	No
GOMF_GO:0022834	ligand-gated channel activity	GOMF	0.044	0.0980976	0	0.0980976	No
GOBP_GO:0050863	regulation of T cell activation	GOBP	-0.054	-0.0350409	-0.132695	0.097654	No
Reactome_R-HSA-112040	G-protein mediated events	Reactome	0.009	0.0975935	0	0.0975935	No
GOCC_GO:0042611	MHC protein complex	GOCC	-0.07	-0.0753439	-0.172813	0.0974692	No
GOBP_GO:0106027	neuron projection organization	GOBP	0.015	0.0961508	0	0.0961508	No
GOBP_GO:0006397	mRNA processing	GOBP	-0.096	0.0535445	-0.0424501	0.0959946	No
Reactome_R-HSA-1566948	Elastic fibre formation	Reactome	0.125	0.0561244	-0.0396535	0.0957779	No
GOBP_GO:0032989	cellular component morphogenesis	GOBP	0.012	0.095358	0	0.095358	No
GOBP_GO:0017156	calcium ion regulated exocytosis	GOBP	0.024	0.095207	0	0.095207	No
GOCC_GO:0030686	90S preribosome	GOCC	-0.044	-0.0931864	-0.187842	0.0946559	No
GOCC_GO:0044420	extracellular matrix component	GOCC	0.206	0.0726576	-0.0219651	0.0946228	No
GOMF_GO:0030695	GTPase regulator activity	GOMF	0.011	0.0934478	0	0.0934478	No
GOBP_GO:0031589	cell-substrate adhesion	GOBP	0.049	0.0665197	-0.0266986	0.0932183	No
GOBP_GO:1903053	regulation of extracellular matrix organization	GOBP	0.013	0.093118	0	0.093118	No
GOBP_GO:0035924	cellular response to vascular endothelial growth factor stimulus	GOBP	0.1	0.0930311	0	0.0930311	No
GOBP_GO:0014047	glutamate secretion	GOBP	0.022	0.0929939	0	0.0929939	No
GOBP_GO:0008038	neuron recognition	GOBP	0.019	0.0928423	0	0.0928423	No
GOBP_GO:0070665	positive regulation of leukocyte proliferation	GOBP	-0.034	-0.0105113	-0.102556	0.0920449	No
GOBP_GO:0048008	platelet-derived growth factor receptor signaling pathway	GOBP	0.028	0.0919315	0	0.0919315	No
Reactome_R-HSA-210500	Glutamate Neurotransmitter Release Cycle	Reactome	0.024	0.0910912	0	0.0910912	No
Reactome_R-HSA-202427	Phosphorylation of CD3 and TCR zeta chains	Reactome	-0.086	-0.0280325	-0.119123	0.091091	No
KEGG_05330	Allograft rejection	KEGG	-0.081	-0.0497658	-0.140549	0.0907837	No
GOMF_GO:0005096	GTPase activator activity	GOMF	0.01	0.0907475	0	0.0907475	No
GOBP_GO:0050650	chondroitin sulfate proteoglycan biosynthetic process	GOBP	0.044	0.0907434	0	0.0907434	No
GOBP_GO:0070527	platelet aggregation	GOBP	0.002	0.0693151	-0.0212838	0.0905989	No
KEGG_04270	Vascular smooth muscle contraction	KEGG	0.022	0.0905402	0	0.0905402	No
Reactome_R-HSA-2024096	HS-GAG degradation	Reactome	0.008	0.0903732	0	0.0903732	No
Reactome_R-HSA-1296041	Activation of G protein gated Potassium channels	Reactome	0.011	0.0898311	0	0.0898311	No
Reactome_R-HSA-1296059	G protein gated Potassium channels	Reactome	0.011	0.0898311	0	0.0898311	No
Reactome_R-HSA-997272	Inhibition of voltage gated Ca2+ channels via Gbeta/gamma subunits	Reactome	0.011	0.0898311	0	0.0898311	No
GOBP_GO:0045321	leukocyte activation	GOBP	-0.038	-0.043435	-0.133161	0.0897258	No
GOCC_GO:0005912	adherens junction	GOCC	0.02	0.0667422	-0.0228541	0.0895963	No
GOBP_GO:0050865	regulation of cell activation	GOBP	-0.039	-0.0595953	-0.148854	0.0892584	No
Reactome_R-HSA-442660	Na+/Cl- dependent neurotransmitter transporters	Reactome	0.508	0.426992	0.337901	0.0890909	Yes
GOCC_GO:0070161	anchoring junction	GOCC	0.019	0.0661619	-0.0225007	0.0886626	No
GOBP_GO:0010770	positive regulation of cell morphogenesis involved in differentiation	GOBP	0.01	0.0886263	0	0.0886263	No
Reactome_R-HSA-202430	Translocation of ZAP-70 to Immunological synapse	Reactome	-0.086	-0.0178653	-0.106059	0.0881933	No
GOBP_GO:0016236	macroautophagy	GOBP	-0.008	0.088106	0	0.088106	No
GOBP_GO:0001776	leukocyte homeostasis	GOBP	-0.009	0	-0.0873577	0.0873577	No
Reactome_R-HSA-373755	Semaphorin interactions	Reactome	0.01	0.0868453	0	0.0868453	No
GOBP_GO:0014808	release of sequestered calcium ion into cytosol by sarcoplasmic reticulum	GOBP	0.006	0.0866647	0	0.0866647	No
GOBP_GO:0002260	lymphocyte homeostasis	GOBP	-0.007	0	-0.0866072	0.0866072	No
GOMF_GO:0005267	potassium channel activity	GOMF	0.06	0.0864537	0	0.0864537	No
GOBP_GO:0030206	chondroitin sulfate biosynthetic process	GOBP	0.073	0.0862977	0	0.0862977	No
Reactome_R-HSA-2022870	Chondroitin sulfate biosynthesis	Reactome	0.073	0.0862977	0	0.0862977	No
GOCC_GO:0008021	synaptic vesicle	GOCC	0.021	0.0862793	0	0.0862793	No
GOBP_GO:0007229	integrin-mediated signaling pathway	GOBP	0.005	0	-0.0849361	0.0849361	No
GOBP_GO:0050900	leukocyte migration	GOBP	0.008	0	-0.0848869	0.0848869	No
GOCC_GO:0030315	T-tubule	GOCC	0.007	0.0844563	0	0.0844563	No
GOBP_GO:0008361	regulation of cell size	GOBP	0.008	0.0843272	0	0.0843272	No
GOBP_GO:1904062	regulation of cation transmembrane transport	GOBP	0.018	0.084084	0	0.084084	No
GOCC_GO:0098857	membrane microdomain	GOCC	0.009	0.0838234	0	0.0838234	No
GOBP_GO:0010595	positive regulation of endothelial cell migration	GOBP	0.035	0.0834121	0	0.0834121	No
Reactome_R-HSA-212676	Dopamine Neurotransmitter Release Cycle	Reactome	0.021	0.0833636	0	0.0833636	No
GOBP_GO:0031295	T cell costimulation	GOBP	-0.06	0.0232359	-0.0600475	0.0832834	No
Reactome_R-HSA-1296072	Voltage gated Potassium channels	Reactome	0.037	0.083107	0	0.083107	No
GOBP_GO:0070296	sarcoplasmic reticulum calcium ion transport	GOBP	0.006	0.0830775	0	0.0830775	No
GOBP_GO:0031294	lymphocyte costimulation	GOBP	-0.06	0.02339	-0.0596655	0.0830555	No
GOMF_GO:0022890	inorganic cation transmembrane transporter activity	GOMF	0.021	0.0829805	0	0.0829805	Yes
KEGG_04145	Phagosome	KEGG	-0.014	-0.0800793	-0.1622	0.0821207	No
GOMF_GO:0015293	symporter activity	GOMF	0.084	0.0820231	0	0.0820231	Yes
GOMF_GO:0023026	MHC class II protein complex binding	GOMF	-0.013	0	-0.081975	0.081975	No
GOBP_GO:0099504	synaptic vesicle cycle	GOBP	0.023	0.0809441	0	0.0809441	No
GOMF_GO:0030276	clathrin binding	GOMF	0.012	0.0807191	0	0.0807191	No
GOCC_GO:0045335	phagocytic vesicle	GOCC	-0.026	-0.0429217	-0.123483	0.0805612	No
GOBP_GO:0016079	synaptic vesicle exocytosis	GOBP	0.023	0.080555	0	0.080555	No
GOBP_GO:0051963	regulation of synapse assembly	GOBP	0.01	0.0801151	0	0.0801151	No
GOBP_GO:0070661	leukocyte proliferation	GOBP	-0.018	-0.0244869	-0.104552	0.080065	No
GOBP_GO:1990138	neuron projection extension	GOBP	0.012	0.0799337	0	0.0799337	No
GOBP_GO:0000045	autophagosome assembly	GOBP	-0.007	0.0795782	0	0.0795782	No
Reactome_R-HSA-445095	Interaction between L1 and Ankyrins	Reactome	0.016	0.0794902	0	0.0794902	No
GOCC_GO:0042641	actomyosin	GOCC	0.028	0.030929	-0.0485194	0.0794485	No
GOBP_GO:0001568	blood vessel development	GOBP	0.159	0.0794216	0	0.0794216	No
GOMF_GO:0015294	solute:cation symporter activity	GOMF	0.087	0.0792479	0	0.0792479	Yes
GOBP_GO:0046651	lymphocyte proliferation	GOBP	-0.023	-0.0249464	-0.104173	0.0792262	No
GOBP_GO:0034762	regulation of transmembrane transport	GOBP	0.015	0.0791809	0	0.0791809	No
KEGG_04512	ECM-receptor interaction	KEGG	0.214	0.110347	0.0311936	0.0791535	No
GOBP_GO:0072358	cardiovascular system development	GOBP	0.153	0.0791409	0	0.0791409	No
GOBP_GO:0032943	mononuclear cell proliferation	GOBP	-0.021	-0.0247753	-0.103865	0.0790899	No
GOMF_GO:0022838	substrate-specific channel activity	GOMF	0.063	0.0790413	0	0.0790413	No
GOBP_GO:0001944	vasculature development	GOBP	0.153	0.0789876	0	0.0789876	No
GOMF_GO:0015077	monovalent inorganic cation transmembrane transporter activity	GOMF	0.032	0.078966	0	0.078966	Yes
GOMF_GO:0005216	ion channel activity	GOMF	0.061	0.0789296	0	0.0789296	No
GOBP_GO:0016241	regulation of macroautophagy	GOBP	0.002	0.0788117	0	0.0788117	No
Reactome_R-HSA-198933	Immunoregulatory interactions between a Lymphoid and a non-Lymphoid cell	Reactome	-0.034	-0.0683463	-0.146369	0.0780224	No
GOBP_GO:0000470	maturation of LSU-rRNA	GOBP	-0.027	-0.0308589	-0.108552	0.0776929	No
GOBP_GO:0001667	ameboidal-type cell migration	GOBP	0.028	0.0773953	0	0.0773953	No
Reactome_R-HSA-418597	G alpha (z) signalling events	Reactome	0.008	0.0771706	0	0.0771706	No
GOBP_GO:0050684	regulation of mRNA processing	GOBP	-0.025	0.0504589	-0.0266647	0.0771236	No
KEGG_04520	Adherens junction	KEGG	0.005	0.0769803	0	0.0769803	No
GOCC_GO:0005681	spliceosomal complex	GOCC	-0.079	0.043701	-0.0332271	0.0769282	No
GOBP_GO:0048589	developmental growth	GOBP	0.008	0.076292	0	0.076292	No
KEGG_05414	Dilated cardiomyopathy	KEGG	0.024	0.0759253	0	0.0759253	No
GOBP_GO:0097061	dendritic spine organization	GOBP	0.013	0.0758097	0	0.0758097	No
GOBP_GO:0035767	endothelial cell chemotaxis	GOBP	0.008	0.0755932	0	0.0755932	No
GOBP_GO:0140115	export across plasma membrane	GOBP	0.011	0.0751085	0	0.0751085	No
GOBP_GO:0007009	plasma membrane organization	GOBP	0.006	0.0748215	0	0.0748215	No
GOMF_GO:0019199	transmembrane receptor protein kinase activity	GOMF	0.028	0.0737057	0	0.0737057	No
GOBP_GO:0051271	negative regulation of cellular component movement	GOBP	0.02	0.0731846	0	0.0731846	No
GOBP_GO:0038084	vascular endothelial growth factor signaling pathway	GOBP	0.079	0.0729381	0	0.0729381	No
GOBP_GO:1901888	regulation of cell junction assembly	GOBP	0.04	0.0728926	0	0.0728926	No
KEGG_05412	Arrhythmogenic right ventricular cardiomyopathy (ARVC)	KEGG	0.024	0.072714	0	0.072714	No
GOBP_GO:0002040	sprouting angiogenesis	GOBP	0.135	0.0722849	0	0.0722849	No
GOBP_GO:0015672	monovalent inorganic cation transport	GOBP	0.016	0.0720101	0	0.0720101	No
Reactome_R-HSA-418457	cGMP effects	Reactome	0.018	0.071514	0	0.071514	No
GOBP_GO:0070663	regulation of leukocyte proliferation	GOBP	-0.026	-0.0340662	-0.10551	0.0714433	No
GOCC_GO:0032809	neuronal cell body membrane	GOCC	0.021	0.0706956	0	0.0706956	No
GOCC_GO:0044298	cell body membrane	GOCC	0.021	0.0706956	0	0.0706956	No
GOCC_GO:0045121	membrane raft	GOCC	0.008	0.0703152	0	0.0703152	No
GOBP_GO:0021954	central nervous system neuron development	GOBP	0.009	0.0701627	0	0.0701627	No
GOMF_GO:0004714	transmembrane receptor protein tyrosine kinase activity	GOMF	0.031	0.0701419	0	0.0701419	No
GOBP_GO:0030182	neuron differentiation	GOBP	0.017	0.0699596	0	0.0699596	No
KEGG_04672	Intestinal immune network for IgA production	KEGG	-0.041	-0.0284556	-0.098256	0.0698005	No
Reactome_R-HSA-389948	PD-1 signaling	Reactome	-0.074	-0.0340297	-0.103748	0.069718	No
GOBP_GO:0051961	negative regulation of nervous system development	GOBP	0.014	0.0692535	0	0.0692535	No
Reactome_R-HSA-422475	Axon guidance	Reactome	-0.004	0	-0.0692137	0.0692137	No
KEGG_05320	Autoimmune thyroid disease	KEGG	-0.025	-0.0258962	-0.0949918	0.0690956	No
GOMF_GO:0005249	voltage-gated potassium channel activity	GOMF	0.061	0.0689656	0	0.0689656	No
GOCC_GO:0098636	protein complex involved in cell adhesion	GOCC	0.021	0.0160816	-0.0526167	0.0686983	No
GOBP_GO:0007043	cell-cell junction assembly	GOBP	0.01	0.0685786	0	0.0685786	No
GOMF_GO:0017016	Ras GTPase binding	GOMF	0.008	0.0681721	0	0.0681721	No
GOBP_GO:0045576	mast cell activation	GOBP	-0.016	-0.0166475	-0.0842095	0.0675619	No
GOBP_GO:0085029	extracellular matrix assembly	GOBP	0.012	0.0675405	0	0.0675405	No
GOBP_GO:0010881	regulation of cardiac muscle contraction by regulation of the release of sequestered calcium ion	GOBP	0.007	0.0674807	0	0.0674807	No
GOMF_GO:0031267	small GTPase binding	GOMF	0.008	0.0673989	0	0.0673989	No
GOBP_GO:0010634	positive regulation of epithelial cell migration	GOBP	0.016	0.0673201	0	0.0673201	No
GOBP_GO:0006364	rRNA processing	GOBP	-0.194	-0.37656	-0.443663	0.0671032	No
GOBP_GO:0007044	cell-substrate junction assembly	GOBP	0.035	0.0667716	0	0.0667716	No
GOBP_GO:0007045	cell-substrate adherens junction assembly	GOBP	0.036	0.0666451	0	0.0666451	No
GOBP_GO:0048041	focal adhesion assembly	GOBP	0.036	0.0666451	0	0.0666451	No
KEGG_05140	Leishmaniasis	KEGG	-0.041	-0.159966	-0.226148	0.0661827	No
GOBP_GO:0045785	positive regulation of cell adhesion	GOBP	-0.002	0	-0.0661675	0.0661675	No
GOBP_GO:0002431	Fc receptor mediated stimulatory signaling pathway	GOBP	-0.014	0	-0.0658	0.0658	No
GOBP_GO:0050670	regulation of lymphocyte proliferation	GOBP	-0.026	-0.014901	-0.0798854	0.0649844	No
Reactome_R-HSA-416482	G alpha (12/13) signalling events	Reactome	0.007	0.0647965	0	0.0647965	No
GOBP_GO:0022409	positive regulation of cell-cell adhesion	GOBP	-0.038	-0.0210832	-0.0852026	0.0641193	No
GOCC_GO:0044306	neuron projection terminus	GOCC	0.011	0.0640681	0	0.0640681	No
GOBP_GO:0030168	platelet activation	GOBP	0.002	0.0423538	-0.021585	0.0639388	No
GOBP_GO:0021987	cerebral cortex development	GOBP	0.004	0.0632515	0	0.0632515	No
GOBP_GO:1903522	regulation of blood circulation	GOBP	0.023	0.0631506	0	0.0631506	No
GOBP_GO:0022407	regulation of cell-cell adhesion	GOBP	-0.012	0	-0.0628835	0.0628835	No
GOBP_GO:0098609	cell-cell adhesion	GOBP	-0.002	0	-0.0625764	0.0625764	No
GOBP_GO:0086019	cell-cell signaling involved in cardiac conduction	GOBP	0.008	0.0624322	0	0.0624322	No
GOBP_GO:0048024	regulation of mRNA splicing, via spliceosome	GOBP	-0.009	0.0369359	-0.0252959	0.0622318	No
GOBP_GO:0002507	tolerance induction	GOBP	-0.002	0	-0.0616907	0.0616907	No
Reactome_R-HSA-163615	PKA activation	Reactome	0.005	0.0610997	0	0.0610997	No
GOMF_GO:0004725	protein tyrosine phosphatase activity	GOMF	0.005	0.0607937	0	0.0607937	No
GOBP_GO:0032944	regulation of mononuclear cell proliferation	GOBP	-0.03	-0.044366	-0.105135	0.0607694	No
GOMF_GO:0015662	ATPase activity, coupled to transmembrane movement of ions, phosphorylative mechanism	GOMF	0.007	0.0604519	0	0.0604519	No
Reactome_R-HSA-186797	Signaling by PDGF	Reactome	0.07	0.0320349	-0.0282395	0.0602744	No
GOBP_GO:0050864	regulation of B cell activation	GOBP	-0.007	0	-0.0594205	0.0594205	No
GOBP_GO:0021537	telencephalon development	GOBP	0.006	0.0593593	0	0.0593593	No
GOBP_GO:0008380	RNA splicing	GOBP	-0.096	0	-0.0592521	0.0592521	No
Reactome_R-HSA-2029482	Regulation of actin dynamics for phagocytic cup formation	Reactome	-0.013	0	-0.059246	0.059246	No
GOBP_GO:0021543	pallium development	GOBP	0.006	0.059098	0	0.059098	No
KEGG_05416	Viral myocarditis	KEGG	-0.005	0.00085334	-0.0580588	0.0589121	No
KEGG_04380	Osteoclast differentiation	KEGG	-0.011	-0.0770569	-0.135902	0.0588456	No
GOBP_GO:0097479	synaptic vesicle localization	GOBP	0.014	0.0587132	0	0.0587132	No
GOBP_GO:0002768	immune response-regulating cell surface receptor signaling pathway	GOBP	-0.047	-0.0181593	-0.0767051	0.0585458	No
GOBP_GO:0002429	immune response-activating cell surface receptor signaling pathway	GOBP	-0.052	-0.0347195	-0.093212	0.0584925	No
GOBP_GO:0050771	negative regulation of axonogenesis	GOBP	0.008	0.0583531	0	0.0583531	No
GOBP_GO:0048489	synaptic vesicle transport	GOBP	0.014	0.0579602	0	0.0579602	No
GOBP_GO:0097480	establishment of synaptic vesicle localization	GOBP	0.014	0.0579602	0	0.0579602	No
GOBP_GO:0099003	vesicle-mediated transport in synapse	GOBP	0.014	0.0579602	0	0.0579602	No
KEGG_04964	Proximal tubule bicarbonate reclamation	KEGG	0.008	0.0575126	0	0.0575126	No
GOMF_GO:0005272	sodium channel activity	GOMF	0.023	0.057408	0	0.057408	No
GOBP_GO:0036465	synaptic vesicle recycling	GOBP	0.008	0.0570708	0	0.0570708	No
GOBP_GO:0006968	cellular defense response	GOBP	-0.019	0	-0.056909	0.056909	No
GOBP_GO:0035725	sodium ion transmembrane transport	GOBP	0.01	0.056773	0	0.056773	No
GOCC_GO:0014704	intercalated disc	GOCC	0.005	0.0567301	0	0.0567301	No
Reactome_R-HSA-936837	Ion transport by P-type ATPases	Reactome	0.009	0.0563651	0	0.0563651	No
GOBP_GO:0007193	adenylate cyclase-inhibiting G-protein coupled receptor signaling pathway	GOBP	0.015	0.0562615	0	0.0562615	No
GOBP_GO:0006935	chemotaxis	GOBP	0.002	0	-0.0562464	0.0562464	No
GOBP_GO:0042330	taxis	GOBP	0.002	0	-0.0562464	0.0562464	No
GOBP_GO:0048488	synaptic vesicle endocytosis	GOBP	0.007	0.0562006	0	0.0562006	No
Reactome_R-HSA-112043	PLC beta mediated events	Reactome	0.007	0.055735	0	0.055735	No
GOBP_GO:1903039	positive regulation of leukocyte cell-cell adhesion	GOBP	-0.069	-0.0767673	-0.132411	0.0556437	No
Reactome_R-HSA-397014	Muscle contraction	Reactome	0.019	0.0554807	0	0.0554807	No
GOBP_GO:0043534	blood vessel endothelial cell migration	GOBP	0.045	0.0554767	0	0.0554767	No
KEGG_04640	Hematopoietic cell lineage	KEGG	-0.009	0	-0.0554495	0.0554495	No
GOBP_GO:0050870	positive regulation of T cell activation	GOBP	-0.07	-0.0762165	-0.131644	0.0554273	No
GOBP_GO:0060411	cardiac septum morphogenesis	GOBP	0.042	0.0552639	0	0.0552639	No
GOBP_GO:0002685	regulation of leukocyte migration	GOBP	0.008	0	-0.0551742	0.0551742	No
GOBP_GO:0010880	regulation of release of sequestered calcium ion into cytosol by sarcoplasmic reticulum	GOBP	0.004	0.0551675	0	0.0551675	No
GOBP_GO:0050768	negative regulation of neurogenesis	GOBP	0.009	0.0551216	0	0.0551216	No
GOBP_GO:0072676	lymphocyte migration	GOBP	-0.015	0	-0.0548934	0.0548934	No
GOCC_GO:0030175	filopodium	GOCC	0.004	0.0546799	0	0.0546799	No
GOMF_GO:0019829	cation-transporting ATPase activity	GOMF	0.005	0.0544866	0	0.0544866	No
Reactome_R-HSA-216083	Integrin cell surface interactions	Reactome	0.222	0.023013	-0.0314409	0.0544538	No
GOMF_GO:0005261	cation channel activity	GOMF	0.075	0.054431	0	0.054431	No
GOCC_GO:0101003	ficolin-1-rich granule membrane	GOCC	-0.005	-0.0158573	-0.070002	0.0541447	No
GOBP_GO:2000146	negative regulation of cell motility	GOBP	0.016	0.0539412	0	0.0539412	No
GOBP_GO:0072678	T cell migration	GOBP	-0.008	0	-0.0539222	0.0539222	No
GOMF_GO:0030551	cyclic nucleotide binding	GOMF	0.007	0.0535829	0	0.0535829	No
KEGG_04720	Long-term potentiation	KEGG	0.009	0.0535244	0	0.0535244	No
Reactome_R-HSA-2682334	EPH-Ephrin signaling	Reactome	0.005	0.053474	0	0.053474	No
GOBP_GO:0060998	regulation of dendritic spine development	GOBP	0.012	0.0533877	0	0.0533877	No
GOBP_GO:1902305	regulation of sodium ion transmembrane transport	GOBP	0.008	0.0533722	0	0.0533722	No
Reactome_R-HSA-71403	Citric acid cycle (TCA cycle)	Reactome	-0.011	0.0900538	0.0367538	0.0533	No
Reactome_R-HSA-1222556	ROS, RNS production in phagocytes	Reactome	-0.006	-0.0182539	-0.0714551	0.0532012	No
GOBP_GO:0034109	homotypic cell-cell adhesion	GOBP	0.003	0.0528873	0	0.0528873	No
KEGG_05130	Pathogenic Escherichia coli infection	KEGG	-0.009	0	-0.0527858	0.0527858	No
GOBP_GO:0043269	regulation of ion transport	GOBP	0.008	0.0524899	0	0.0524899	No
Reactome_R-HSA-8956320	Nucleobase biosynthesis	Reactome	0	0	-0.0523354	0.0523354	No
GOBP_GO:0035909	aorta morphogenesis	GOBP	0.097	0.0520823	0	0.0520823	No
GOCC_GO:0001725	stress fiber	GOCC	0.025	0	-0.0520811	0.0520811	No
GOCC_GO:0097517	contractile actin filament bundle	GOCC	0.025	0	-0.0520811	0.0520811	No
KEGG_04260	Cardiac muscle contraction	KEGG	0.003	0.0517702	0	0.0517702	No
GOBP_GO:0055117	regulation of cardiac muscle contraction	GOBP	0.004	0.0516506	0	0.0516506	No
GOCC_GO:0005775	vacuolar lumen	GOCC	-0.006	0	-0.0511703	0.0511703	No
GOCC_GO:0005581	collagen trimer	GOCC	0.22	0.0387538	-0.012386	0.0511398	No
GOBP_GO:0050920	regulation of chemotaxis	GOBP	0.017	0	-0.0510119	0.0510119	No
Reactome_R-HSA-1442490	Collagen degradation	Reactome	0.209	0.00858818	-0.0421399	0.0507281	No
GOBP_GO:0043038	amino acid activation	GOBP	-0.043	-0.0193713	-0.0697232	0.0503519	No
GOBP_GO:0043039	tRNA aminoacylation	GOBP	-0.043	-0.0193713	-0.0697232	0.0503519	No
GOBP_GO:0006735	NADH regeneration	GOBP	0.003	0	-0.050021	0.050021	No
GOBP_GO:0061615	glycolytic process through fructose-6-phosphate	GOBP	0.003	0	-0.050021	0.050021	No
GOBP_GO:0061620	glycolytic process through glucose-6-phosphate	GOBP	0.003	0	-0.050021	0.050021	No
GOBP_GO:0061621	canonical glycolysis	GOBP	0.003	0	-0.050021	0.050021	No
GOBP_GO:0061718	glucose catabolic process to pyruvate	GOBP	0.003	0	-0.050021	0.050021	No
Reactome_R-HSA-419037	NCAM1 interactions	Reactome	0.055	0.0498993	0	0.0498993	No
GOCC_GO:0030687	preribosome, large subunit precursor	GOCC	-0.026	0	-0.0498148	0.0498148	No
GOBP_GO:0002495	antigen processing and presentation of peptide antigen via MHC class II	GOBP	-0.009	-0.018342	-0.0681189	0.0497769	No
GOBP_GO:0044091	membrane biogenesis	GOBP	0.005	0.0497122	0	0.0497122	No
GOBP_GO:0002504	antigen processing and presentation of peptide or polysaccharide antigen via MHC class II	GOBP	-0.008	-0.0185476	-0.068142	0.0495944	No
Reactome_R-HSA-422356	Regulation of insulin secretion	Reactome	0.005	0.049525	0	0.049525	No
GOMF_GO:0001540	amyloid-beta binding	GOMF	0.004	0.0490349	0	0.0490349	No
GOBP_GO:0042113	B cell activation	GOBP	-0.014	0	-0.0488986	0.0488986	No
GOCC_GO:0032432	actin filament bundle	GOCC	0.022	0	-0.0488847	0.0488847	No
GOCC_GO:0031012	extracellular matrix	GOCC	0.104	0.0288843	-0.0199589	0.0488432	No
GOBP_GO:0006909	phagocytosis	GOBP	-0.013	-0.0169424	-0.0657002	0.0487578	No
GOBP_GO:0006418	tRNA aminoacylation for protein translation	GOBP	-0.038	-0.0189956	-0.0673329	0.0483373	No
Reactome_R-HSA-379724	tRNA Aminoacylation	Reactome	-0.041	-0.018961	-0.0670366	0.0480756	No
KEGG_03013	RNA transport	KEGG	-0.091	-0.0538985	-0.101446	0.0475478	No
GOMF_GO:0008186	RNA-dependent ATPase activity	GOMF	-0.015	0	-0.0474282	0.0474282	No
GOBP_GO:2000573	positive regulation of DNA biosynthetic process	GOBP	-0.004	0	-0.0472454	0.0472454	No
GOMF_GO:0004004	ATP-dependent RNA helicase activity	GOMF	-0.015	0	-0.047234	0.047234	No
GOMF_GO:0070717	poly-purine tract binding	GOMF	0	0.0471298	0	0.0471298	No
GOBP_GO:0048791	calcium ion-regulated exocytosis of neurotransmitter	GOBP	0.012	0.0467314	0	0.0467314	No
Reactome_R-HSA-164378	PKA activation in glucagon signalling	Reactome	0.004	0.0466994	0	0.0466994	No
GOBP_GO:0072132	mesenchyme morphogenesis	GOBP	0.036	0.0196204	-0.0269694	0.0465897	No
GOMF_GO:0005201	extracellular matrix structural constituent	GOMF	0.134	0.0299257	-0.0165	0.0464257	No
Reactome_R-HSA-3000170	Syndecan interactions	Reactome	0.13	0.0683367	0.0224708	0.0458658	No
GOCC_GO:0030054	cell junction	GOCC	0.01	0.0457833	0	0.0457833	No
GOMF_GO:0005089	Rho guanyl-nucleotide exchange factor activity	GOMF	0.008	0.0455991	0	0.0455991	No
GOBP_GO:0042554	superoxide anion generation	GOBP	-0.002	0	-0.0452457	0.0452457	No
KEGG_04142	Lysosome	KEGG	-0.032	0	-0.0451972	0.0451972	No
GOBP_GO:0050671	positive regulation of lymphocyte proliferation	GOBP	-0.03	-0.0107592	-0.0559115	0.0451523	No
KEGG_00190	Oxidative phosphorylation	KEGG	-0.086	0.0869235	0.0420952	0.0448283	No
GOBP_GO:0032946	positive regulation of mononuclear cell proliferation	GOBP	-0.028	-0.0107005	-0.0554975	0.044797	No
Reactome_R-HSA-375165	NCAM signaling for neurite out-growth	Reactome	0.019	0.044744	0	0.044744	No
GOMF_GO:0044325	ion channel binding	GOMF	0.004	0.0444503	0	0.0444503	No
GOCC_GO:0035869	ciliary transition zone	GOCC	0.001	0	-0.0443873	0.0443873	No
Reactome_R-HSA-8875878	MET promotes cell motility	Reactome	0.11	0.044208	0	0.044208	No
Reactome_R-HSA-373752	Netrin-1 signaling	Reactome	0.005	0.0439409	0	0.0439409	No
GOBP_GO:0090382	phagosome maturation	GOBP	-0.003	0	-0.0435537	0.0435537	No
GOBP_GO:0048675	axon extension	GOBP	0.005	0.0434586	0	0.0434586	No
GOMF_GO:0022804	active transmembrane transporter activity	GOMF	0.013	0.0430902	0	0.0430902	Yes
GOBP_GO:0006403	RNA localization	GOBP	-0.095	-0.0735425	-0.11643	0.0428876	No
GOBP_GO:0050775	positive regulation of dendrite morphogenesis	GOBP	0.003	0.0428732	0	0.0428732	No
Reactome_R-HSA-114604	GPVI-mediated activation cascade	Reactome	-0.014	0.0219255	-0.020771	0.0426965	No
Reactome_R-HSA-111933	Calmodulin induced events	Reactome	0.004	0.042561	0	0.042561	No
Reactome_R-HSA-111997	CaM pathway	Reactome	0.004	0.042561	0	0.042561	No
GOBP_GO:0007160	cell-matrix adhesion	GOBP	0.045	0.0425342	0	0.0425342	No
GOMF_GO:0003823	antigen binding	GOMF	-0.027	-0.014917	-0.0572502	0.0423333	No
Reactome_R-HSA-2029480	Fcgamma receptor (FCGR) dependent phagocytosis	Reactome	-0.012	0	-0.0418068	0.0418068	No
GOCC_GO:0008305	integrin complex	GOCC	0.026	0.0154979	-0.026109	0.0416069	No
GOMF_GO:0004115	3',5'-cyclic-AMP phosphodiesterase activity	GOMF	0.01	0.041256	0	0.041256	No
Reactome_R-HSA-111996	Ca-dependent events	Reactome	0.004	0.0407934	0	0.0407934	No
Reactome_R-HSA-181430	Norepinephrine Neurotransmitter Release Cycle	Reactome	0.012	0.0407115	0	0.0407115	No
GOMF_GO:0030515	snoRNA binding	GOMF	-0.026	-0.0345228	-0.0751826	0.0406599	No
GOBP_GO:0090075	relaxation of muscle	GOBP	0.002	0.0400838	0	0.0400838	No
GOBP_GO:0038094	Fc-gamma receptor signaling pathway	GOBP	-0.011	0	-0.0400756	0.0400756	No
Reactome_R-HSA-70263	Gluconeogenesis	Reactome	0.003	0.0567957	0.0167246	0.0400711	No
GOCC_GO:0070820	tertiary granule	GOCC	-0.019	-0.0311073	-0.0711415	0.0400342	No
Reactome_R-HSA-111885	Opioid Signalling	Reactome	0.004	0.0400013	0	0.0400013	No
GOBP_GO:0046597	negative regulation of viral entry into host cell	GOBP	-0.003	0	-0.0398561	0.0398561	No
GOMF_GO:0019905	syntaxin binding	GOMF	0.008	0.0398378	0	0.0398378	No
GOBP_GO:0043618	regulation of transcription from RNA polymerase II promoter in response to stress	GOBP	-0.02	-0.0133706	-0.0531994	0.0398289	No
GOBP_GO:0002433	immune response-regulating cell surface receptor signaling pathway involved in phagocytosis	GOBP	-0.011	0	-0.0397368	0.0397368	No
GOBP_GO:0038096	Fc-gamma receptor signaling pathway involved in phagocytosis	GOBP	-0.011	0	-0.0397368	0.0397368	No
GOBP_GO:0035904	aorta development	GOBP	0.116	0.064033	0.0244444	0.0395886	No
GOBP_GO:0098901	regulation of cardiac muscle cell action potential	GOBP	0.004	0.0394459	0	0.0394459	No
GOMF_GO:0005262	calcium channel activity	GOMF	0.021	0.0393334	0	0.0393334	No
KEGG_04730	Long-term depression	KEGG	0.004	0.0391196	0	0.0391196	No
GOBP_GO:0072359	circulatory system development	GOBP	0.108	0.0390552	0	0.0390552	No
GOMF_GO:0005085	guanyl-nucleotide exchange factor activity	GOMF	0.004	0.0390157	0	0.0390157	No
GOMF_GO:0005518	collagen binding	GOMF	0.208	0.0634629	0.0244867	0.0389762	No
GOMF_GO:0046943	carboxylic acid transmembrane transporter activity	GOMF	0.034	0.038929	0	0.038929	Yes
GOCC_GO:0070382	exocytic vesicle	GOCC	0.011	0.038893	0	0.038893	No
GOBP_GO:0021872	forebrain generation of neurons	GOBP	0.006	0.0388702	0	0.0388702	No
GOCC_GO:0030990	intraciliary transport particle	GOCC	-0.003	0	-0.0386483	0.0386483	No
GOBP_GO:0098900	regulation of action potential	GOBP	0.005	0.0383471	0	0.0383471	No
Reactome_R-HSA-445355	Smooth Muscle Contraction	Reactome	0.046	0.0169377	-0.0213751	0.0383128	No
GOCC_GO:0016469	proton-transporting two-sector ATPase complex	GOCC	-0.023	0.0382625	0	0.0382625	No
GOMF_GO:0015179	L-amino acid transmembrane transporter activity	GOMF	0.003	0.0381765	0	0.0381765	No
GOBP_GO:0010977	negative regulation of neuron projection development	GOBP	0.007	0.0380181	0	0.0380181	No
Reactome_R-HSA-446353	Cell-extracellular matrix interactions	Reactome	0.033	0.0211771	-0.0167162	0.0378933	No
GOMF_GO:0017048	Rho GTPase binding	GOMF	0.007	0.0378406	0	0.0378406	No
GOBP_GO:0048017	inositol lipid-mediated signaling	GOBP	0.003	0.0377758	0	0.0377758	No
Reactome_R-HSA-451927	Interleukin-2 family signaling	Reactome	-0.012	0.0214029	-0.0159017	0.0373045	No
GOBP_GO:0090257	regulation of muscle system process	GOBP	0.003	0.0368889	0	0.0368889	No
GOMF_GO:0015291	secondary active transmembrane transporter activity	GOMF	0.035	0.036804	0	0.036804	Yes
GOCC_GO:0005766	primary lysosome	GOCC	-0.037	-0.028457	-0.0651406	0.0366836	No
GOCC_GO:0042582	azurophil granule	GOCC	-0.037	-0.028457	-0.0651406	0.0366836	No
GOBP_GO:0048514	blood vessel morphogenesis	GOBP	0.141	0.0363847	0	0.0363847	No
Reactome_R-HSA-72706	GTP hydrolysis and joining of the 60S ribosomal subunit	Reactome	-0.176	-0.316922	-0.353083	0.0361612	No
GOBP_GO:0007263	nitric oxide mediated signal transduction	GOBP	0.002	0.0359567	0	0.0359567	No
GOCC_GO:0044853	plasma membrane raft	GOCC	0.003	0.0357169	0	0.0357169	No
KEGG_05010	Alzheimer's disease	KEGG	-0.03	0.0586376	0.0229874	0.0356503	No
GOMF_GO:0003924	GTPase activity	GOMF	-0.004	0	-0.0355981	0.0355981	No
Reactome_R-HSA-1474228	Degradation of the extracellular matrix	Reactome	0.144	0.0353978	0	0.0353978	No
Reactome_R-HSA-76005	Response to elevated platelet cytosolic Ca2+	Reactome	0.03	0.0522514	0.016984	0.0352674	No
GOCC_GO:0071556	integral component of lumenal side of endoplasmic reticulum membrane	GOCC	-0.028	-0.0297559	-0.0648222	0.0350663	No
GOCC_GO:0098553	lumenal side of endoplasmic reticulum membrane	GOCC	-0.028	-0.0297559	-0.0648222	0.0350663	No
GOBP_GO:0048699	generation of neurons	GOBP	0.012	0.0348517	0	0.0348517	No
GOBP_GO:0021795	cerebral cortex cell migration	GOBP	0.002	0.0347687	0	0.0347687	No
GOBP_GO:0022008	neurogenesis	GOBP	0.012	0.0347384	0	0.0347384	No
GOBP_GO:2000649	regulation of sodium ion transmembrane transporter activity	GOBP	0.006	0.0343574	0	0.0343574	No
GOBP_GO:0003158	endothelium development	GOBP	0.063	0.0341945	0	0.0341945	No
GOBP_GO:0061418	regulation of transcription from RNA polymerase II promoter in response to hypoxia	GOBP	-0.042	-0.0151477	-0.049146	0.0339983	No
GOBP_GO:0006023	aminoglycan biosynthetic process	GOBP	0.052	0.0339698	0	0.0339698	No
Reactome_R-HSA-8868773	rRNA processing in the nucleus and cytosol	Reactome	-0.205	-0.448354	-0.482073	0.0337192	No
GOBP_GO:0006024	glycosaminoglycan biosynthetic process	GOBP	0.054	0.0336615	0	0.0336615	No
GOBP_GO:0045665	negative regulation of neuron differentiation	GOBP	0.008	0.0336273	0	0.0336273	No
GOBP_GO:0030155	regulation of cell adhesion	GOBP	0.004	0	-0.0332184	0.0332184	No
GOBP_GO:0035265	organ growth	GOBP	0.009	0.0332001	0	0.0332001	No
GOBP_GO:0072583	clathrin-dependent endocytosis	GOBP	0.005	0.0331797	0	0.0331797	No
GOCC_GO:0032040	small-subunit processome	GOCC	-0.051	-0.142866	-0.176022	0.0331553	No
GOBP_GO:0071709	membrane assembly	GOBP	0.004	0.0330217	0	0.0330217	No
Reactome_R-HSA-1296065	Inwardly rectifying K+ channels	Reactome	0.008	0.0329831	0	0.0329831	No
GOBP_GO:0006814	sodium ion transport	GOBP	0.006	0.0329645	0	0.0329645	No
GOBP_GO:0060047	heart contraction	GOBP	0.008	0.0329475	0	0.0329475	No
GOBP_GO:0019228	neuronal action potential	GOBP	0.005	0.0329016	0	0.0329016	No
GOBP_GO:0030203	glycosaminoglycan metabolic process	GOBP	0.037	0.0328125	0	0.0328125	No
GOBP_GO:0061383	trabecula morphogenesis	GOBP	0.007	0.0326984	0	0.0326984	No
Reactome_R-HSA-6791226	Major pathway of rRNA processing in the nucleolus and cytosol	Reactome	-0.2	-0.446968	-0.479613	0.0326445	No
GOCC_GO:0043235	receptor complex	GOCC	0.006	0.0323656	0	0.0323656	No
GOMF_GO:0022824	transmitter-gated ion channel activity	GOMF	0.043	0.0322652	0	0.0322652	No
GOMF_GO:0022835	transmitter-gated channel activity	GOMF	0.043	0.0322652	0	0.0322652	No
GOBP_GO:0003015	heart process	GOBP	0.008	0.0321243	0	0.0321243	No
GOBP_GO:0001822	kidney development	GOBP	0.017	0.0319884	0	0.0319884	No
GOBP_GO:0001655	urogenital system development	GOBP	0.013	0.0317854	0	0.0317854	No
GOBP_GO:0006939	smooth muscle contraction	GOBP	0.004	0.0317485	0	0.0317485	No
Reactome_R-HSA-163685	Integration of energy metabolism	Reactome	0.003	0.0316203	0	0.0316203	No
GOMF_GO:0050431	transforming growth factor beta binding	GOMF	0.038	0.0311726	0	0.0311726	No
GOBP_GO:1902803	regulation of synaptic vesicle transport	GOBP	0.006	0.0309175	0	0.0309175	No
GOBP_GO:0001522	pseudouridine synthesis	GOBP	-0.006	0	-0.0308678	0.0308678	No
GOBP_GO:0072001	renal system development	GOBP	0.026	0.0307356	0	0.0307356	No
GOMF_GO:0004812	aminoacyl-tRNA ligase activity	GOMF	-0.029	-0.0333459	-0.0640338	0.0306879	No
GOBP_GO:0034250	positive regulation of cellular amide metabolic process	GOBP	-0.001	0	-0.030526	0.030526	No
GOBP_GO:0086009	membrane repolarization	GOBP	0.003	0.0304791	0	0.0304791	No
GOCC_GO:0098644	complex of collagen trimers	GOCC	0.194	0.0304723	0	0.0304723	No
GOBP_GO:0060999	positive regulation of dendritic spine development	GOBP	0.003	0.0303191	0	0.0303191	No
GOBP_GO:0007051	spindle organization	GOBP	-0.017	0	-0.0302291	0.0302291	No
GOBP_GO:0030098	lymphocyte differentiation	GOBP	-0.013	0	-0.0302011	0.0302011	No
GOMF_GO:0016247	channel regulator activity	GOMF	0.009	0.0301346	0	0.0301346	No
GOMF_GO:0036442	hydrogen-exporting ATPase activity	GOMF	-0.007	0	-0.0300698	0.0300698	No
GOMF_GO:0046961	proton-transporting ATPase activity, rotational mechanism	GOMF	-0.007	0	-0.0300698	0.0300698	No
GOMF_GO:0005178	integrin binding	GOMF	0.061	0.0300569	0	0.0300569	No
GOBP_GO:0046631	alpha-beta T cell activation	GOBP	-0.015	0	-0.0298418	0.0298418	No
GOBP_GO:1903510	mucopolysaccharide metabolic process	GOBP	0.034	0.029758	0	0.029758	No
GOBP_GO:0050855	regulation of B cell receptor signaling pathway	GOBP	-0.003	0	-0.0297199	0.0297199	No
GOBP_GO:0001764	neuron migration	GOBP	0.005	0.0296593	0	0.0296593	No
GOBP_GO:0071887	leukocyte apoptotic process	GOBP	-0.004	0	-0.0294156	0.0294156	No
Reactome_R-HSA-72203	Processing of Capped Intron-Containing Pre-mRNA	Reactome	-0.137	-0.0978837	-0.127293	0.0294094	No
GOMF_GO:0004112	cyclic-nucleotide phosphodiesterase activity	GOMF	0.004	0.0293929	0	0.0293929	No
GOMF_GO:0005342	organic acid transmembrane transporter activity	GOMF	0.04	0.0292893	0	0.0292893	Yes
GOBP_GO:0030217	T cell differentiation	GOBP	-0.013	0	-0.0292467	0.0292467	No
GOBP_GO:0000466	maturation of 5.8S rRNA from tricistronic rRNA transcript (SSU-rRNA, 5.8S rRNA, LSU-rRNA)	GOBP	-0.016	-0.0491516	-0.0783414	0.0291898	No
GOMF_GO:0008509	anion transmembrane transporter activity	GOMF	0.007	0.0291533	0	0.0291533	Yes
GOBP_GO:0050871	positive regulation of B cell activation	GOBP	-0.002	0	-0.0290821	0.0290821	No
GOBP_GO:0055023	positive regulation of cardiac muscle tissue growth	GOBP	0.003	0.0288233	0	0.0288233	No
Reactome_R-HSA-8949613	Cristae formation	Reactome	-0.046	0.0288226	0	0.0288226	No
GOBP_GO:0060402	calcium ion transport into cytosol	GOBP	0.005	0.0285908	0	0.0285908	No
KEGG_04666	Fc gamma R-mediated phagocytosis	KEGG	-0.009	0	-0.0285035	0.0285035	No
GOMF_GO:0001056	RNA polymerase III activity	GOMF	-0.006	0	-0.0284666	0.0284666	No
GOBP_GO:0022612	gland morphogenesis	GOBP	-0.002	0	-0.0284069	0.0284069	No
KEGG_05145	Toxoplasmosis	KEGG	-0.002	0	-0.0283878	0.0283878	No
GOBP_GO:0099054	presynapse assembly	GOBP	0.003	0.0283324	0	0.0283324	No
GOMF_GO:0043394	proteoglycan binding	GOMF	0.027	0.0282856	0	0.0282856	No
GOMF_GO:0022821	potassium ion antiporter activity	GOMF	0.005	0.0280949	0	0.0280949	No
GOBP_GO:0007220	Notch receptor processing	GOBP	0.017	0.02782	0	0.02782	No
GOBP_GO:0090329	regulation of DNA-dependent DNA replication	GOBP	-0.007	0	-0.0276977	0.0276977	No
GOBP_GO:0042407	cristae formation	GOBP	-0.042	0.0276502	0	0.0276502	No
GOBP_GO:0070227	lymphocyte apoptotic process	GOBP	-0.003	0	-0.027496	0.027496	No
GOBP_GO:0046622	positive regulation of organ growth	GOBP	0.005	0.0273452	0	0.0273452	No
GOBP_GO:0060421	positive regulation of heart growth	GOBP	0.005	0.0273452	0	0.0273452	No
Reactome_R-HSA-877300	Interferon gamma signaling	Reactome	-0.032	-0.0649384	-0.0919671	0.0270288	No
GOBP_GO:0097028	dendritic cell differentiation	GOBP	-0.001	0	-0.0268628	0.0268628	No
GOBP_GO:0070098	chemokine-mediated signaling pathway	GOBP	0.015	0	-0.0268505	0.0268505	No
GOBP_GO:0000027	ribosomal large subunit assembly	GOBP	-0.038	-0.0944741	-0.120894	0.0264196	No
GOBP_GO:0030888	regulation of B cell proliferation	GOBP	-0.009	0	-0.0264106	0.0264106	No
Reactome_R-HSA-373760	L1CAM interactions	Reactome	0.006	0.0263373	0	0.0263373	No
KEGG_04514	Cell adhesion molecules (CAMs)	KEGG	0.006	0	-0.026292	0.026292	No
GOBP_GO:0034199	activation of protein kinase A activity	GOBP	0.002	0.0262717	0	0.0262717	No
GOBP_GO:0032206	positive regulation of telomere maintenance	GOBP	-0.007	0	-0.0262558	0.0262558	No
GOMF_GO:0017147	Wnt-protein binding	GOMF	0.016	0.0261858	0	0.0261858	No
Reactome_R-HSA-380270	Recruitment of mitotic centrosome proteins and complexes	Reactome	-0.016	0	-0.0261222	0.0261222	No
Reactome_R-HSA-380287	Centrosome maturation	Reactome	-0.016	0	-0.0261222	0.0261222	No
GOBP_GO:0010501	RNA secondary structure unwinding	GOBP	-0.011	0	-0.0261109	0.0261109	No
GOBP_GO:0019932	second-messenger-mediated signaling	GOBP	0.002	0.0261104	0	0.0261104	No
GOCC_GO:0005732	small nucleolar ribonucleoprotein complex	GOCC	-0.024	-0.120088	-0.146191	0.0261026	No
GOBP_GO:0015682	ferric iron transport	GOBP	-0.004	0	-0.0260217	0.0260217	No
GOBP_GO:0072512	trivalent inorganic cation transport	GOBP	-0.004	0	-0.0260217	0.0260217	No
GOMF_GO:0003724	RNA helicase activity	GOMF	-0.015	0	-0.0259981	0.0259981	No
GOCC_GO:0070821	tertiary granule membrane	GOCC	-0.016	-0.0662642	-0.0922243	0.0259601	No
KEGG_05016	Huntington's disease	KEGG	-0.044	0.0259506	0	0.0259506	No
GOBP_GO:0035384	thioester biosynthetic process	GOBP	0.006	0.0458599	0.0199243	0.0259356	No
GOBP_GO:0071616	acyl-CoA biosynthetic process	GOBP	0.006	0.0458599	0.0199243	0.0259356	No
KEGG_05120	Epithelial cell signaling in Helicobacter pylori infection	KEGG	-0.003	0	-0.0258966	0.0258966	No
Reactome_R-HSA-380259	Loss of Nlp from mitotic centrosomes	Reactome	-0.02	0	-0.0258544	0.0258544	No
Reactome_R-HSA-380284	Loss of proteins required for interphase microtubule organization from the centrosome	Reactome	-0.02	0	-0.0258544	0.0258544	No
GOMF_GO:0003729	mRNA binding	GOMF	-0.031	0	-0.0257755	0.0257755	No
Reactome_R-HSA-8854518	AURKA Activation by TPX2	Reactome	-0.017	0	-0.0257232	0.0257232	No
GOBP_GO:0021766	hippocampus development	GOBP	0.002	0.0257156	0	0.0257156	No
GOBP_GO:0014855	striated muscle cell proliferation	GOBP	0.002	0.0256595	0	0.0256595	No
GOBP_GO:0044243	multicellular organismal catabolic process	GOBP	0.238	0.00633759	-0.0191684	0.025506	No
GOBP_GO:0046949	fatty-acyl-CoA biosynthetic process	GOBP	0.012	0.0642311	0.0387766	0.0254545	No
GOCC_GO:0101002	ficolin-1-rich granule	GOCC	-0.043	-0.0386131	-0.0640645	0.0254515	No
Reactome_R-HSA-5658442	Regulation of RAS by GAPs	Reactome	-0.053	-0.013722	-0.0391354	0.0254134	No
GOBP_GO:0014065	phosphatidylinositol 3-kinase signaling	GOBP	0.002	0.0252158	0	0.0252158	No
GOBP_GO:0048872	homeostasis of number of cells	GOBP	-0.005	0	-0.0251983	0.0251983	No
GOBP_GO:0030260	entry into host cell	GOBP	-0.001	0	-0.0251147	0.0251147	No
GOBP_GO:0044409	entry into host	GOBP	-0.001	0	-0.0251147	0.0251147	No
GOBP_GO:0051806	entry into cell of other organism involved in symbiotic interaction	GOBP	-0.001	0	-0.0251147	0.0251147	No
GOBP_GO:0051828	entry into other organism involved in symbiotic interaction	GOBP	-0.001	0	-0.0251147	0.0251147	No
GOCC_GO:0032589	neuron projection membrane	GOCC	0.01	0.0249698	0	0.0249698	No
GOBP_GO:0045992	negative regulation of embryonic development	GOBP	0.021	0	-0.0246137	0.0246137	No
GOBP_GO:0032212	positive regulation of telomere maintenance via telomerase	GOBP	-0.005	0	-0.02441	0.02441	No
GOBP_GO:0006007	glucose catabolic process	GOBP	0.007	0	-0.0243326	0.0243326	No
GOBP_GO:0032204	regulation of telomere maintenance	GOBP	-0.008	0	-0.0241297	0.0241297	No
GOBP_GO:0032649	regulation of interferon-gamma production	GOBP	-0.01	0	-0.0241209	0.0241209	No
KEGG_04662	B cell receptor signaling pathway	KEGG	-0.017	0	-0.0240491	0.0240491	No
KEGG_03060	Protein export	KEGG	-0.013	0	-0.0240019	0.0240019	No
GOBP_GO:0006278	RNA-dependent DNA biosynthetic process	GOBP	-0.022	0	-0.0239958	0.0239958	No
GOMF_GO:0061733	peptide-lysine-N-acetyltransferase activity	GOMF	-0.009	0.023905	0	0.023905	No
GOBP_GO:0045773	positive regulation of axon extension	GOBP	0.004	0.0237833	0	0.0237833	No
Reactome_R-HSA-77387	Insulin receptor recycling	Reactome	-0.004	0	-0.023782	0.023782	No
GOMF_GO:0034212	peptide N-acetyltransferase activity	GOMF	-0.008	0.0237638	0	0.0237638	No
GOBP_GO:0070316	regulation of G0 to G1 transition	GOBP	-0.004	0.0236762	0	0.0236762	No
GOBP_GO:0045023	G0 to G1 transition	GOBP	-0.001	0.0234967	0	0.0234967	No
GOBP_GO:0050851	antigen receptor-mediated signaling pathway	GOBP	-0.097	-0.0497225	-0.0731384	0.0234158	No
GOBP_GO:0048705	skeletal system morphogenesis	GOBP	0.007	0.0233657	0	0.0233657	No
GOCC_GO:0030426	growth cone	GOCC	0.007	0.0232997	0	0.0232997	No
Reactome_R-HSA-2132295	MHC class II antigen presentation	Reactome	-0.005	0	-0.0232981	0.0232981	No
GOCC_GO:0005604	basement membrane	GOCC	0.133	0.0509655	0.0277003	0.0232653	No
GOMF_GO:0004402	histone acetyltransferase activity	GOMF	-0.004	0.0232211	0	0.0232211	No
GOCC_GO:0030427	site of polarized growth	GOCC	0.006	0.0231355	0	0.0231355	No
GOBP_GO:0050686	negative regulation of mRNA processing	GOBP	-0.007	0	-0.0231209	0.0231209	No
Reactome_R-HSA-6807878	COPI-mediated anterograde transport	Reactome	-0.008	0	-0.023105	0.023105	No
GOBP_GO:0061387	regulation of extent of cell growth	GOBP	0.002	0.0230785	0	0.0230785	No
GOCC_GO:0005901	caveola	GOCC	0.009	0.0230759	0	0.0230759	No
GOBP_GO:2000278	regulation of DNA biosynthetic process	GOBP	-0.003	0	-0.0230493	0.0230493	No
GOMF_GO:0072509	divalent inorganic cation transmembrane transporter activity	GOMF	0.004	0.0230158	0	0.0230158	No
GOBP_GO:0035107	appendage morphogenesis	GOBP	0.007	0.0227934	0	0.0227934	No
GOBP_GO:0035108	limb morphogenesis	GOBP	0.007	0.0227934	0	0.0227934	No
Reactome_R-HSA-397795	G-protein beta:gamma signalling	Reactome	0.001	0.0227624	0	0.0227624	No
GOBP_GO:0021761	limbic system development	GOBP	0.002	0.0226957	0	0.0226957	No
GOMF_GO:0045296	cadherin binding	GOMF	-0.017	0	-0.0226606	0.0226606	No
GOBP_GO:0031167	rRNA methylation	GOBP	-0.005	0	-0.0226425	0.0226425	No
KEGG_05340	Primary immunodeficiency	KEGG	-0.108	0	-0.0225012	0.0225012	No
GOBP_GO:0014066	regulation of phosphatidylinositol 3-kinase signaling	GOBP	0.002	0.0224317	0	0.0224317	No
GOBP_GO:0071622	regulation of granulocyte chemotaxis	GOBP	0.003	0	-0.0223776	0.0223776	No
GOBP_GO:0051973	positive regulation of telomerase activity	GOBP	-0.001	0	-0.0223776	0.0223776	No
GOCC_GO:0000123	histone acetyltransferase complex	GOCC	-0.027	0.0222129	0	0.0222129	No
GOBP_GO:0007157	heterophilic cell-cell adhesion via plasma membrane cell adhesion molecules	GOBP	0.003	0.022184	0	0.022184	No
GOCC_GO:0016607	nuclear speck	GOCC	-0.011	0	-0.0221653	0.0221653	No
Reactome_R-HSA-392451	G beta:gamma signalling through PI3Kgamma	Reactome	0.001	0.0221529	0	0.0221529	No
KEGG_03040	Spliceosome	KEGG	-0.111	-0.0791327	-0.10128	0.022147	No
GOBP_GO:0052695	cellular glucuronidation	GOBP	0.052	0	-0.0221187	0.0221187	No
GOBP_GO:0030516	regulation of axon extension	GOBP	0.002	0.0218532	0	0.0218532	No
Reactome_R-HSA-73772	RNA Polymerase I Promoter Escape	Reactome	-0.005	0	-0.0218025	0.0218025	No
GOBP_GO:0006363	termination of RNA polymerase I transcription	GOBP	-0.006	0	-0.0216894	0.0216894	No
Reactome_R-HSA-73863	RNA Polymerase I Transcription Termination	Reactome	-0.006	0	-0.0216894	0.0216894	No
Reactome_R-HSA-380108	Chemokine receptors bind chemokines	Reactome	-0.006	0	-0.021689	0.021689	No
GOBP_GO:0045730	respiratory burst	GOBP	-0.005	0	-0.0216856	0.0216856	No
GOBP_GO:0006734	NADH metabolic process	GOBP	-0.002	0	-0.0215297	0.0215297	No
GOMF_GO:0042625	ATPase coupled ion transmembrane transporter activity	GOMF	0.002	0.0214756	0	0.0214756	No
Reactome_R-HSA-983695	Antigen activates B Cell Receptor (BCR) leading to generation of second messengers	Reactome	-0.008	0.0213852	0	0.0213852	No
GOMF_GO:0042813	Wnt-activated receptor activity	GOMF	0.012	0.0213088	0	0.0213088	No
Reactome_R-HSA-425407	SLC-mediated transmembrane transport	Reactome	0.006	0.0209397	0	0.0209397	Yes
GOBP_GO:0002263	cell activation involved in immune response	GOBP	-0.036	-0.0690785	-0.090009	0.0209305	No
GOMF_GO:0050839	cell adhesion molecule binding	GOMF	0.004	0.0209132	0	0.0209132	No
GOBP_GO:0010874	regulation of cholesterol efflux	GOBP	0.001	0.0208435	0	0.0208435	No
Reactome_R-HSA-72312	rRNA processing	Reactome	-0.205	-0.449657	-0.470441	0.0207833	No
GOMF_GO:0042287	MHC protein binding	GOMF	-0.014	0	-0.0207619	0.0207619	No
GOBP_GO:0098742	cell-cell adhesion via plasma-membrane adhesion molecules	GOBP	0.002	0.020759	0	0.020759	No
GOMF_GO:0016917	GABA receptor activity	GOMF	0.028	0.0206857	0	0.0206857	No
GOBP_GO:0016482	cytosolic transport	GOBP	-0.01	0.020666	0	0.020666	No
Reactome_R-HSA-72086	mRNA Capping	Reactome	-0.016	0	-0.0205731	0.0205731	No
GOBP_GO:0002448	mast cell mediated immunity	GOBP	-0.009	-0.0180647	-0.0385675	0.0205028	No
GOBP_GO:0051236	establishment of RNA localization	GOBP	-0.06	0	-0.0204371	0.0204371	No
GOBP_GO:0007423	sensory organ development	GOBP	0.003	0.0204213	0	0.0204213	No
GOBP_GO:0002011	morphogenesis of an epithelial sheet	GOBP	0.003	0.0204106	0	0.0204106	No
GOMF_GO:0019838	growth factor binding	GOMF	0.069	0.0203695	0	0.0203695	No
GOBP_GO:0018393	internal peptidyl-lysine acetylation	GOBP	-0.008	0.0202882	0	0.0202882	No
GOBP_GO:0050657	nucleic acid transport	GOBP	-0.06	0	-0.0202832	0.0202832	No
GOBP_GO:0050658	RNA transport	GOBP	-0.06	0	-0.0202832	0.0202832	No
GOBP_GO:0015931	nucleobase-containing compound transport	GOBP	-0.049	0	-0.0202708	0.0202708	No
GOBP_GO:0006936	muscle contraction	GOBP	0.028	0.0202547	0	0.0202547	No
GOBP_GO:0016573	histone acetylation	GOBP	-0.007	0.0202454	0	0.0202454	No
GOBP_GO:0002279	mast cell activation involved in immune response	GOBP	-0.009	-0.0175514	-0.0377802	0.0202287	No
GOBP_GO:0043303	mast cell degranulation	GOBP	-0.009	-0.0175514	-0.0377802	0.0202287	No
GOBP_GO:0090596	sensory organ morphogenesis	GOBP	0.003	0.020101	0	0.020101	No
Reactome_R-HSA-912526	Interleukin receptor SHC signaling	Reactome	-0.003	0.0200813	0	0.0200813	No
GOBP_GO:0014068	positive regulation of phosphatidylinositol 3-kinase signaling	GOBP	0.008	0.0200665	0	0.0200665	No
GOBP_GO:0042098	T cell proliferation	GOBP	-0.019	-0.0556161	-0.0756687	0.0200526	No
GOBP_GO:0018394	peptidyl-lysine acetylation	GOBP	-0.006	0.0200361	0	0.0200361	No
GOBP_GO:0048013	ephrin receptor signaling pathway	GOBP	0.002	0.0199442	0	0.0199442	No
GOBP_GO:0060021	palate development	GOBP	0.001	0.0198734	0	0.0198734	No
GOBP_GO:0045667	regulation of osteoblast differentiation	GOBP	0.003	0.0198542	0	0.0198542	No
GOBP_GO:0014013	regulation of gliogenesis	GOBP	0.002	0.0197962	0	0.0197962	No
GOBP_GO:0003012	muscle system process	GOBP	0.018	0.0197576	0	0.0197576	No
KEGG_05100	Bacterial invasion of epithelial cells	KEGG	0.002	0.0197108	0	0.0197108	No
GOBP_GO:0003279	cardiac septum development	GOBP	0.041	0.019674	0	0.019674	No
GOBP_GO:0090183	regulation of kidney development	GOBP	0.001	0.0196511	0	0.0196511	No
GOBP_GO:0007613	memory	GOBP	0.003	0.0196222	0	0.0196222	No
GOCC_GO:0008074	guanylate cyclase complex, soluble	GOCC	0.006	0.0195971	0	0.0195971	No
GOMF_GO:0004383	guanylate cyclase activity	GOMF	0.006	0.0195971	0	0.0195971	No
GOBP_GO:0051028	mRNA transport	GOBP	-0.059	-0.0163342	-0.0359228	0.0195886	No
GOBP_GO:0043267	negative regulation of potassium ion transport	GOBP	0.001	0.0195701	0	0.0195701	No
GOBP_GO:0001501	skeletal system development	GOBP	0.033	0.0195533	0	0.0195533	No
Reactome_R-HSA-72187	mRNA 3'-end processing	Reactome	-0.045	-0.0225201	-0.042044	0.0195239	No
GOBP_GO:0030900	forebrain development	GOBP	0.003	0.0194973	0	0.0194973	No
Reactome_R-HSA-1234174	Regulation of Hypoxia-inducible Factor (HIF) by oxygen	Reactome	-0.048	-0.0267208	-0.0461894	0.0194686	No
Reactome_R-HSA-2262749	Cellular response to hypoxia	Reactome	-0.048	-0.0267208	-0.0461894	0.0194686	No
GOBP_GO:0060291	long-term synaptic potentiation	GOBP	0.002	0.0194261	0	0.0194261	No
GOBP_GO:0003281	ventricular septum development	GOBP	0.02	0.0193424	0	0.0193424	No
GOBP_GO:0006475	internal protein amino acid acetylation	GOBP	-0.003	0.0193005	0	0.0193005	No
GOBP_GO:0006413	translational initiation	GOBP	-0.15	-0.249741	-0.26896	0.0192194	No
GOBP_GO:0050772	positive regulation of axonogenesis	GOBP	0.003	0.0192017	0	0.0192017	No
Reactome_R-HSA-167169	HIV Transcription Elongation	Reactome	-0.012	0	-0.0191987	0.0191987	No
Reactome_R-HSA-167200	Formation of HIV-1 elongation complex containing HIV-1 Tat	Reactome	-0.012	0	-0.0191987	0.0191987	No
Reactome_R-HSA-167246	Tat-mediated elongation of the HIV-1 transcript	Reactome	-0.012	0	-0.0191987	0.0191987	No
GOBP_GO:0045727	positive regulation of translation	GOBP	-0.006	-0.012624	-0.0318128	0.0191888	No
GOBP_GO:0007156	homophilic cell adhesion via plasma membrane adhesion molecules	GOBP	0.001	0.0191089	0	0.0191089	No
KEGG_00970	Aminoacyl-tRNA biosynthesis	KEGG	-0.026	-0.0180112	-0.0371037	0.0190925	No
GOMF_GO:0005230	extracellular ligand-gated ion channel activity	GOMF	0.029	0.0190892	0	0.0190892	No
GOBP_GO:0043010	camera-type eye development	GOBP	0.004	0.0190277	0	0.0190277	No
GOBP_GO:0030278	regulation of ossification	GOBP	0.005	0.0188738	0	0.0188738	No
GOMF_GO:0008514	organic anion transmembrane transporter activity	GOMF	0.019	0.0188667	0	0.0188667	Yes
GOBP_GO:0001654	eye development	GOBP	0.005	0.0188243	0	0.0188243	No
GOBP_GO:0060840	artery development	GOBP	0.105	0.0188231	0	0.0188231	No
GOMF_GO:0005242	inward rectifier potassium channel activity	GOMF	0.007	0.0188095	0	0.0188095	No
Reactome_R-HSA-111931	PKA-mediated phosphorylation of CREB	Reactome	0.002	0.0187714	0	0.0187714	No
GOBP_GO:0048483	autonomic nervous system development	GOBP	0.002	0.0185948	0	0.0185948	No
GOBP_GO:0043620	regulation of DNA-templated transcription in response to stress	GOBP	-0.026	-0.0366018	-0.0551445	0.0185427	No
GOBP_GO:0015012	heparan sulfate proteoglycan biosynthetic process	GOBP	0.001	0.0184681	0	0.0184681	No
GOBP_GO:0031111	negative regulation of microtubule polymerization or depolymerization	GOBP	0.002	0.0184012	0	0.0184012	No
Reactome_R-HSA-2129379	Molecules associated with elastic fibres	Reactome	0.092	0	-0.0183161	0.0183161	No
GOBP_GO:0045744	negative regulation of G-protein coupled receptor protein signaling pathway	GOBP	0.001	0.0182796	0	0.0182796	No
GOBP_GO:0007610	behavior	GOBP	0.007	0.0182778	0	0.0182778	No
GOBP_GO:0001525	angiogenesis	GOBP	0.138	0.0182572	0	0.0182572	No
Reactome_R-HSA-425393	Transport of inorganic cations/anions and amino acids/oligopeptides	Reactome	0.002	0.0181671	0	0.0181671	No
GOBP_GO:0043266	regulation of potassium ion transport	GOBP	0.005	0.0180037	0	0.0180037	No
GOBP_GO:0030334	regulation of cell migration	GOBP	0.017	0.0179816	0	0.0179816	No
GOCC_GO:0098533	ATPase dependent transmembrane transport complex	GOCC	0.001	0.0179561	0	0.0179561	No
GOBP_GO:0006099	tricarboxylic acid cycle	GOBP	-0.001	0.13136	0.113505	0.017855	No
GOCC_GO:1904813	ficolin-1-rich granule lumen	GOCC	-0.059	-0.0367189	-0.0545049	0.017786	No
GOBP_GO:0045669	positive regulation of osteoblast differentiation	GOBP	0.004	0.0177354	0	0.0177354	No
GOBP_GO:0031345	negative regulation of cell projection organization	GOBP	0.004	0.0176826	0	0.0176826	No
Reactome_R-HSA-5627123	RHO GTPases activate PAKs	Reactome	0.003	0.0176656	0	0.0176656	No
GOBP_GO:0048247	lymphocyte chemotaxis	GOBP	-0.009	0	-0.0176545	0.0176545	No
GOBP_GO:0007411	axon guidance	GOBP	0.006	0.0175367	0	0.0175367	No
GOBP_GO:0097485	neuron projection guidance	GOBP	0.006	0.0175367	0	0.0175367	No
GOBP_GO:1901379	regulation of potassium ion transmembrane transport	GOBP	0.005	0.0175359	0	0.0175359	No
GOBP_GO:0006818	hydrogen transport	GOBP	-0.012	0.0174986	0	0.0174986	No
Reactome_R-HSA-163210	Formation of ATP by chemiosmotic coupling	Reactome	-0.031	0.0580295	0.040531	0.0174985	No
GOBP_GO:0060412	ventricular septum morphogenesis	GOBP	0.023	0.0174338	0	0.0174338	No
GOBP_GO:0003272	endocardial cushion formation	GOBP	0.012	0.0174086	0	0.0174086	No
KEGG_05131	Shigellosis	KEGG	-0.008	0	-0.0173263	0.0173263	No
GOBP_GO:0048566	embryonic digestive tract development	GOBP	0.014	0.0172558	0	0.0172558	No
GOBP_GO:0060348	bone development	GOBP	0.008	0.0171829	0	0.0171829	No
Reactome_R-HSA-177929	Signaling by EGFR	Reactome	0.001	0.0170886	0	0.0170886	No
GOBP_GO:0072073	kidney epithelium development	GOBP	-0.001	0.0170764	0	0.0170764	No
Reactome_R-HSA-5663213	RHO GTPases Activate WASPs and WAVEs	Reactome	-0.008	0	-0.0169798	0.0169798	No
GOBP_GO:0045778	positive regulation of ossification	GOBP	0.006	0.0168949	0	0.0168949	No
KEGG_04912	GnRH signaling pathway	KEGG	0.001	0.016878	0	0.016878	No
GOBP_GO:0098656	anion transmembrane transport	GOBP	0.001	0.0168552	0	0.0168552	No
GOBP_GO:0006937	regulation of muscle contraction	GOBP	0.001	0.0167488	0	0.0167488	No
GOMF_GO:0004114	3',5'-cyclic-nucleotide phosphodiesterase activity	GOMF	0.006	0.0167199	0	0.0167199	No
Reactome_R-HSA-418360	Platelet calcium homeostasis	Reactome	0.001	0.0166584	0	0.0166584	No
GOBP_GO:0032411	positive regulation of transporter activity	GOBP	0.001	0.0165573	0	0.0165573	No
GOBP_GO:0006906	vesicle fusion	GOBP	0.002	0.0165186	0	0.0165186	No
GOBP_GO:0060042	retina morphogenesis in camera-type eye	GOBP	0.001	0.0163849	0	0.0163849	No
GOCC_GO:0030672	synaptic vesicle membrane	GOCC	0.014	0.0163662	0	0.0163662	No
GOCC_GO:0099501	exocytic vesicle membrane	GOCC	0.014	0.0163662	0	0.0163662	No
GOBP_GO:0098693	regulation of synaptic vesicle cycle	GOBP	0.005	0.0163429	0	0.0163429	No
GOBP_GO:0086014	atrial cardiac muscle cell action potential	GOBP	0.009	0.0163009	0	0.0163009	No
GOBP_GO:0086026	atrial cardiac muscle cell to AV node cell signaling	GOBP	0.009	0.0163009	0	0.0163009	No
GOBP_GO:0086066	atrial cardiac muscle cell to AV node cell communication	GOBP	0.009	0.0163009	0	0.0163009	No
GOBP_GO:0042776	mitochondrial ATP synthesis coupled proton transport	GOBP	-0.054	0.0558613	0.0397569	0.0161044	No
GOBP_GO:0003170	heart valve development	GOBP	0.047	0.0160988	0	0.0160988	No
GOBP_GO:0003179	heart valve morphogenesis	GOBP	0.047	0.0160988	0	0.0160988	No
Reactome_R-HSA-264642	Acetylcholine Neurotransmitter Release Cycle	Reactome	0.011	0.0160778	0	0.0160778	No
GOMF_GO:0038024	cargo receptor activity	GOMF	0.003	0.0160445	0	0.0160445	No
Reactome_R-HSA-1855204	Synthesis of IP3 and IP4 in the cytosol	Reactome	0.001	0.0160362	0	0.0160362	No
GOBP_GO:0006022	aminoglycan metabolic process	GOBP	0.022	0.0159112	0	0.0159112	No
Reactome_R-HSA-5627117	RHO GTPases Activate ROCKs	Reactome	0.002	0.0158938	0	0.0158938	No
GOCC_GO:0030670	phagocytic vesicle membrane	GOCC	-0.026	-0.0312184	-0.0469729	0.0157545	No
GOBP_GO:0098660	inorganic ion transmembrane transport	GOBP	0.008	0.0155412	0	0.0155412	No
GOBP_GO:0007189	adenylate cyclase-activating G-protein coupled receptor signaling pathway	GOBP	0.002	0.0154554	0	0.0154554	No
GOBP_GO:0097553	calcium ion transmembrane import into cytosol	GOBP	0.004	0.0153235	0	0.0153235	No
GOBP_GO:0048660	regulation of smooth muscle cell proliferation	GOBP	0.008	0.015266	0	0.015266	No
GOCC_GO:0030176	integral component of endoplasmic reticulum membrane	GOCC	-0.001	0.0152034	0	0.0152034	No
GOBP_GO:0098655	cation transmembrane transport	GOBP	0.008	0.015198	0	0.015198	No
GOBP_GO:0021953	central nervous system neuron differentiation	GOBP	0.008	0.0151853	0	0.0151853	No
GOBP_GO:0030201	heparan sulfate proteoglycan metabolic process	GOBP	0.001	0.0151527	0	0.0151527	No
GOCC_GO:0005905	clathrin-coated pit	GOCC	0.003	0.0151418	0	0.0151418	No
GOBP_GO:0098662	inorganic cation transmembrane transport	GOBP	0.008	0.0151163	0	0.0151163	No
GOBP_GO:0030001	metal ion transport	GOBP	0.004	0.0150812	0	0.0150812	No
GOBP_GO:0034767	positive regulation of ion transmembrane transport	GOBP	0.001	0.0150493	0	0.0150493	No
KEGG_04974	Protein digestion and absorption	KEGG	0.038	0.0150215	0	0.0150215	No
GOCC_GO:0031227	intrinsic component of endoplasmic reticulum membrane	GOCC	-0.001	0.0149486	0	0.0149486	No
GOBP_GO:0034220	ion transmembrane transport	GOBP	0.006	0.0149338	0	0.0149338	No
GOMF_GO:0031420	alkali metal ion binding	GOMF	0.002	0.0149144	0	0.0149144	No
Reactome_R-HSA-416572	Sema4D induced cell migration and growth-cone collapse	Reactome	0.001	0.0148764	0	0.0148764	No
GOBP_GO:0050805	negative regulation of synaptic transmission	GOBP	0.001	0.0148374	0	0.0148374	No
GOBP_GO:0086002	cardiac muscle cell action potential involved in contraction	GOBP	0.006	0.0148328	0	0.0148328	No
KEGG_05146	Amoebiasis	KEGG	0.029	0.0147853	0	0.0147853	No
GOBP_GO:0048659	smooth muscle cell proliferation	GOBP	0.008	0.0147663	0	0.0147663	No
GOBP_GO:0048708	astrocyte differentiation	GOBP	0.002	0.014731	0	0.014731	No
GOMF_GO:0030594	neurotransmitter receptor activity	GOMF	0.093	0.0147279	0	0.0147279	No
GOBP_GO:0060333	interferon-gamma-mediated signaling pathway	GOBP	-0.052	-0.0899192	-0.10463	0.0147104	No
GOBP_GO:0060401	cytosolic calcium ion transport	GOBP	0.001	0.0146989	0	0.0146989	No
GOBP_GO:0055006	cardiac cell development	GOBP	0.012	0.0146987	0	0.0146987	No
GOBP_GO:0051893	regulation of focal adhesion assembly	GOBP	0.024	0.0146637	0	0.0146637	No
GOBP_GO:0090109	regulation of cell-substrate junction assembly	GOBP	0.024	0.0146637	0	0.0146637	No
GOBP_GO:0010959	regulation of metal ion transport	GOBP	0.003	0.0146354	0	0.0146354	No
GOBP_GO:1903391	regulation of adherens junction organization	GOBP	0.023	0.0146106	0	0.0146106	No
GOBP_GO:0086003	cardiac muscle cell contraction	GOBP	0.005	0.0145946	0	0.0145946	No
Reactome_R-HSA-8856828	Clathrin-mediated endocytosis	Reactome	0.001	0.0145568	0	0.0145568	No
GOBP_GO:0044273	sulfur compound catabolic process	GOBP	0.006	0.0145327	0	0.0145327	No
GOBP_GO:1903305	regulation of regulated secretory pathway	GOBP	0.004	0.0144843	0	0.0144843	No
GOBP_GO:0051489	regulation of filopodium assembly	GOBP	0.003	0.0144766	0	0.0144766	No
GOBP_GO:0001504	neurotransmitter uptake	GOBP	0.003	0.0144404	0	0.0144404	No
GOBP_GO:0071695	anatomical structure maturation	GOBP	0.001	0.0143613	0	0.0143613	No
GOBP_GO:0050651	dermatan sulfate proteoglycan biosynthetic process	GOBP	0.033	0.0143467	0	0.0143467	No
KEGG_04810	Regulation of actin cytoskeleton	KEGG	0.002	0.0142769	0	0.0142769	No
GOMF_GO:0042605	peptide antigen binding	GOMF	-0.021	-0.0334525	-0.0477091	0.0142566	No
GOCC_GO:0033017	sarcoplasmic reticulum membrane	GOCC	0.006	0.0141815	0	0.0141815	No
Reactome_R-HSA-400685	Sema4D in semaphorin signaling	Reactome	0.001	0.0141723	0	0.0141723	No
GOCC_GO:0098802	plasma membrane receptor complex	GOCC	0.001	0.0139228	0	0.0139228	No
GOBP_GO:0051349	positive regulation of lyase activity	GOBP	0.001	0.0138367	0	0.0138367	No
GOBP_GO:0023061	signal release	GOBP	0.006	0.013788	0	0.013788	No
GOBP_GO:0044057	regulation of system process	GOBP	0.015	0.0137722	0	0.0137722	No
GOMF_GO:0008013	beta-catenin binding	GOMF	0.001	0.0136884	0	0.0136884	No
GOBP_GO:0051209	release of sequestered calcium ion into cytosol	GOBP	0.001	0.013677	0	0.013677	No
GOBP_GO:0051282	regulation of sequestering of calcium ion	GOBP	0.001	0.013677	0	0.013677	No
GOBP_GO:0051283	negative regulation of sequestering of calcium ion	GOBP	0.001	0.013677	0	0.013677	No
GOBP_GO:0010522	regulation of calcium ion transport into cytosol	GOBP	0.002	0.0136363	0	0.0136363	No
GOBP_GO:0048639	positive regulation of developmental growth	GOBP	0.003	0.0136155	0	0.0136155	No
GOBP_GO:0055017	cardiac muscle tissue growth	GOBP	0.007	0.0136102	0	0.0136102	No
GOBP_GO:0033002	muscle cell proliferation	GOBP	0.008	0.0135971	0	0.0135971	No
GOBP_GO:0072659	protein localization to plasma membrane	GOBP	0.001	0.0135492	0	0.0135492	No
GOBP_GO:0006835	dicarboxylic acid transport	GOBP	0.006	0.0134754	0	0.0134754	No
Reactome_R-HSA-72689	Formation of a pool of free 40S subunits	Reactome	-0.178	-0.335511	-0.34898	0.0134686	No
GOCC_GO:0031256	leading edge membrane	GOCC	0.001	0.0132974	0	0.0132974	No
KEGG_04144	Endocytosis	KEGG	0.001	0.0132551	0	0.0132551	No
GOBP_GO:0016071	mRNA metabolic process	GOBP	-0.112	-0.0825983	-0.0958305	0.0132323	No
GOBP_GO:0040013	negative regulation of locomotion	GOBP	0.008	0.0131548	0	0.0131548	No
GOBP_GO:0002042	cell migration involved in sprouting angiogenesis	GOBP	0.029	0.0131427	0	0.0131427	No
GOCC_GO:0031252	cell leading edge	GOCC	0.006	0.0131082	0	0.0131082	No
GOBP_GO:0051279	regulation of release of sequestered calcium ion into cytosol	GOBP	0.001	0.01308	0	0.01308	No
GOBP_GO:0003013	circulatory system process	GOBP	0.02	0.0130777	0	0.0130777	No
GOBP_GO:0008015	blood circulation	GOBP	0.017	0.0130057	0	0.0130057	No
GOBP_GO:0051208	sequestering of calcium ion	GOBP	0.001	0.0129723	0	0.0129723	No
GOBP_GO:0046596	regulation of viral entry into host cell	GOBP	-0.002	-0.0144093	-0.0273676	0.0129582	No
GOCC_GO:0098590	plasma membrane region	GOCC	0.001	0.0128751	0	0.0128751	No
GOBP_GO:1990778	protein localization to cell periphery	GOBP	0.001	0.0127699	0	0.0127699	No
GOMF_GO:0016820	hydrolase activity, acting on acid anhydrides, catalyzing transmembrane movement of substances	GOMF	0.001	0.0127501	0	0.0127501	No
GOMF_GO:0042626	ATPase activity, coupled to transmembrane movement of substances	GOMF	0.001	0.0127501	0	0.0127501	No
KEGG_04710	Circadian rhythm	KEGG	0.001	0.012582	0	0.012582	No
GOMF_GO:0015399	primary active transmembrane transporter activity	GOMF	0.001	0.0125119	0	0.0125119	No
GOMF_GO:0015405	P-P-bond-hydrolysis-driven transmembrane transporter activity	GOMF	0.001	0.0125119	0	0.0125119	No
GOBP_GO:0030534	adult behavior	GOBP	0.005	0.0124551	0	0.0124551	No
Reactome_R-HSA-72613	Eukaryotic Translation Initiation	Reactome	-0.174	-0.318744	-0.331175	0.0124306	No
Reactome_R-HSA-72737	Cap-dependent Translation Initiation	Reactome	-0.174	-0.318744	-0.331175	0.0124306	No
GOCC_GO:0099568	cytoplasmic region	GOCC	0.001	0.0123256	0	0.0123256	No
GOCC_GO:0005796	Golgi lumen	GOCC	0.027	0.0123078	0	0.0123078	No
GOBP_GO:0051145	smooth muscle cell differentiation	GOBP	0.022	0.0122699	0	0.0122699	No
GOCC_GO:0035578	azurophil granule lumen	GOCC	-0.025	-0.0531001	-0.0652058	0.0121058	No
GOCC_GO:0005938	cell cortex	GOCC	0.001	0.0120634	0	0.0120634	No
GOBP_GO:0046847	filopodium assembly	GOBP	0.002	0.0119385	0	0.0119385	No
GOCC_GO:0016528	sarcoplasm	GOCC	0.007	0.0118637	0	0.0118637	No
GOBP_GO:0048638	regulation of developmental growth	GOBP	0.002	0.0118329	0	0.0118329	No
GOBP_GO:0006898	receptor-mediated endocytosis	GOBP	0.006	0.0116735	0	0.0116735	No
GOBP_GO:0071417	cellular response to organonitrogen compound	GOBP	0.001	0.0116482	0	0.0116482	No
GOBP_GO:0048015	phosphatidylinositol-mediated signaling	GOBP	0.001	0.0114554	0	0.0114554	No
GOBP_GO:0090066	regulation of anatomical structure size	GOBP	0.001	0.0113749	0	0.0113749	No
GOBP_GO:0006509	membrane protein ectodomain proteolysis	GOBP	0.001	0.0113236	0	0.0113236	No
GOBP_GO:0060627	regulation of vesicle-mediated transport	GOBP	0.001	0.0112647	0	0.0112647	No
Reactome_R-HSA-72165	mRNA Splicing - Minor Pathway	Reactome	-0.067	-0.0136379	-0.0247441	0.0111062	No
GOBP_GO:0001570	vasculogenesis	GOBP	0.064	0.0110514	0	0.0110514	No
Reactome_R-HSA-156827	L13a-mediated translational silencing of Ceruloplasmin expression	Reactome	-0.174	-0.316471	-0.327414	0.0109435	No
GOBP_GO:0032535	regulation of cellular component size	GOBP	0.001	0.0107695	0	0.0107695	No
GOBP_GO:0098657	import into cell	GOBP	0.003	0.0107394	0	0.0107394	No
GOBP_GO:0048002	antigen processing and presentation of peptide antigen	GOBP	-0.072	-0.0796072	-0.0902727	0.0106655	No
Reactome_R-HSA-451326	Activation of kainate receptors upon glutamate binding	Reactome	0.001	0.0105257	0	0.0105257	No
Reactome_R-HSA-425366	Transport of bile salts and organic acids, metal ions and amine compounds	Reactome	0.068	0.0331688	0.0229469	0.0102219	Yes
GOBP_GO:0030030	cell projection organization	GOBP	0.004	0.0102082	0	0.0102082	No
GOBP_GO:0120036	plasma membrane bounded cell projection organization	GOBP	0.004	0.0101215	0	0.0101215	No
GOMF_GO:0008324	cation transmembrane transporter activity	GOMF	0.008	0.0100442	0	0.0100442	Yes
Reactome_R-HSA-5610785	GLI3 is processed to GLI3R by the proteasome	Reactome	-0.081	-0.0622972	-0.0715605	0.00926333	No
GOBP_GO:0048844	artery morphogenesis	GOBP	0.114	0.0334242	0.0241718	0.00925231	No
GOBP_GO:0030970	retrograde protein transport, ER to cytosol	GOBP	-0.004	-0.017511	-0.0265843	0.00907328	No
GOBP_GO:1903513	endoplasmic reticulum to cytosol transport	GOBP	-0.004	-0.017511	-0.0265843	0.00907328	No
GOBP_GO:0000469	cleavage involved in rRNA processing	GOBP	-0.024	-0.0470562	-0.0561236	0.00906739	No
GOMF_GO:0008135	translation factor activity, RNA binding	GOMF	-0.057	-0.0166759	-0.0254542	0.00877831	No
GOBP_GO:0002274	myeloid leukocyte activation	GOBP	-0.05	-0.082886	-0.0913986	0.00851259	No
GOBP_GO:0042102	positive regulation of T cell proliferation	GOBP	-0.037	-0.0620185	-0.0700473	0.00802874	No
GOBP_GO:0002577	regulation of antigen processing and presentation	GOBP	-0.004	-0.0146053	-0.0222881	0.00768276	No
GOCC_GO:0005852	eukaryotic translation initiation factor 3 complex	GOCC	-0.023	-0.0182833	-0.0259028	0.00761943	No
Reactome_R-HSA-3371453	Regulation of HSF1-mediated heat shock response	Reactome	-0.025	-0.0150786	-0.0218359	0.00675726	No
GOBP_GO:0016072	rRNA metabolic process	GOBP	-0.182	-0.37145	-0.377428	0.0059783	No
GOBP_GO:0010257	NADH dehydrogenase complex assembly	GOBP	-0.073	0.00795158	0.00217146	0.00578012	No
GOBP_GO:0032981	mitochondrial respiratory chain complex I assembly	GOBP	-0.073	0.00795158	0.00217146	0.00578012	No
GOBP_GO:0097031	mitochondrial respiratory chain complex I biogenesis	GOBP	-0.073	0.00795158	0.00217146	0.00578012	No
GOBP_GO:0007052	mitotic spindle organization	GOBP	-0.015	-0.0234079	-0.0290815	0.00567355	No
GOBP_GO:1902850	microtubule cytoskeleton organization involved in mitosis	GOBP	-0.021	-0.022713	-0.0281443	0.00543129	No
GOBP_GO:0032609	interferon-gamma production	GOBP	-0.012	-0.0191493	-0.0245531	0.00540376	No
GOBP_GO:0019886	antigen processing and presentation of exogenous peptide antigen via MHC class II	GOBP	-0.005	-0.0188151	-0.023778	0.00496286	No
GOBP_GO:0002366	leukocyte activation involved in immune response	GOBP	-0.041	-0.0854658	-0.0902918	0.00482601	No
GOMF_GO:0045236	CXCR chemokine receptor binding	GOMF	0.004	-0.0196283	-0.0243929	0.00476453	No
KEGG_03008	Ribosome biogenesis in eukaryotes	KEGG	-0.087	-0.187336	-0.191957	0.00462174	No
KEGG_05012	Parkinson's disease	KEGG	-0.083	0.0863385	0.0818074	0.00453113	No
Reactome_R-HSA-381038	XBP1(S) activates chaperone genes	Reactome	-0.013	-0.0172731	-0.0215284	0.00425536	No
GOBP_GO:0090383	phagosome acidification	GOBP	-0.007	-0.019653	-0.0231567	0.0035037	No
GOBP_GO:1900034	regulation of cellular response to heat	GOBP	-0.014	-0.0141541	-0.0171517	0.00299759	No
KEGG_00480	Glutathione metabolism	KEGG	0	0	-0.00287454	0.00287454	No
GOCC_GO:0071013	catalytic step 2 spliceosome	GOCC	-0.06	-0.0147385	-0.0174103	0.00267179	No
GOBP_GO:0031123	RNA 3'-end processing	GOBP	-0.058	-0.0217699	-0.0242749	0.00250502	No
GOCC_GO:0098803	respiratory chain complex	GOCC	-0.097	0.0477097	0.0457212	0.00198847	No
Reactome_R-HSA-512988	Interleukin-3, 5 and GM-CSF signaling	Reactome	-0.016	0.00172735	0	0.00172735	No
GOBP_GO:0000460	maturation of 5.8S rRNA	GOBP	-0.027	-0.0524725	-0.0540109	0.00153841	No
Reactome_R-HSA-389957	Prefoldin mediated transfer of substrate to CCT/TriC	Reactome	-0.03	-0.123696	-0.124103	0.000407456	No
GOBP_GO:0000002	mitochondrial genome maintenance	GOBP	0	0	0	0	No
GOBP_GO:0000003	reproduction	GOBP	0	0	0	0	No
GOBP_GO:0000018	regulation of DNA recombination	GOBP	-0.003	0	0	0	No
GOBP_GO:0000041	transition metal ion transport	GOBP	0	0	0	0	No
GOBP_GO:0000060	protein import into nucleus, translocation	GOBP	0	0	0	0	No
GOBP_GO:0000076	DNA replication checkpoint	GOBP	-0.004	0	0	0	No
GOBP_GO:0000079	regulation of cyclin-dependent protein serine/threonine kinase activity	GOBP	0	0	0	0	No
GOBP_GO:0000122	negative regulation of transcription from RNA polymerase II promoter	GOBP	0	0	0	0	No
GOBP_GO:0000165	MAPK cascade	GOBP	0	0	0	0	No
GOBP_GO:0000186	activation of MAPKK activity	GOBP	0.001	0	0	0	No
GOBP_GO:0000187	activation of MAPK activity	GOBP	0	0	0	0	No
GOBP_GO:0000188	inactivation of MAPK activity	GOBP	0	0	0	0	No
GOBP_GO:0000209	protein polyubiquitination	GOBP	-0.014	0	0	0	No
GOBP_GO:0000226	microtubule cytoskeleton organization	GOBP	0	0	0	0	No
GOBP_GO:0000245	spliceosomal complex assembly	GOBP	-0.019	0	0	0	No
GOBP_GO:0000266	mitochondrial fission	GOBP	0	0	0	0	No
GOBP_GO:0000271	polysaccharide biosynthetic process	GOBP	0	0	0	0	No
GOBP_GO:0000272	polysaccharide catabolic process	GOBP	0	0	0	0	No
GOBP_GO:0000281	mitotic cytokinesis	GOBP	-0.003	0	0	0	No
GOBP_GO:0000288	nuclear-transcribed mRNA catabolic process, deadenylation-dependent decay	GOBP	-0.013	0	0	0	No
GOBP_GO:0000289	nuclear-transcribed mRNA poly(A) tail shortening	GOBP	-0.004	0	0	0	No
GOBP_GO:0000291	nuclear-transcribed mRNA catabolic process, exonucleolytic	GOBP	-0.024	0	0	0	No
GOBP_GO:0000302	response to reactive oxygen species	GOBP	0	0	0	0	No
GOBP_GO:0000305	response to oxygen radical	GOBP	0	0	0	0	No
GOBP_GO:0000380	alternative mRNA splicing, via spliceosome	GOBP	-0.002	0	0	0	No
GOBP_GO:0000381	regulation of alternative mRNA splicing, via spliceosome	GOBP	0	0	0	0	No
GOBP_GO:0000394	RNA splicing, via endonucleolytic cleavage and ligation	GOBP	0	0	0	0	No
GOBP_GO:0000422	autophagy of mitochondrion	GOBP	-0.002	0	0	0	No
GOBP_GO:0000578	embryonic axis specification	GOBP	0	0	0	0	No
GOBP_GO:0000715	nucleotide-excision repair, DNA damage recognition	GOBP	-0.011	0	0	0	No
GOBP_GO:0000717	nucleotide-excision repair, DNA duplex unwinding	GOBP	-0.007	0	0	0	No
GOBP_GO:0000726	non-recombinational repair	GOBP	-0.011	0	0	0	No
GOBP_GO:0000729	DNA double-strand break processing	GOBP	0	0	0	0	No
GOBP_GO:0000737	DNA catabolic process, endonucleolytic	GOBP	0	0	0	0	No
GOBP_GO:0000768	syncytium formation by plasma membrane fusion	GOBP	0	0	0	0	No
GOBP_GO:0000910	cytokinesis	GOBP	-0.002	0	0	0	No
GOBP_GO:0000920	cell separation after cytokinesis	GOBP	-0.002	0	0	0	No
GOBP_GO:0001101	response to acid chemical	GOBP	0	0	0	0	No
GOBP_GO:0001325	formation of extrachromosomal circular DNA	GOBP	0	0	0	0	No
GOBP_GO:0001503	ossification	GOBP	0	0	0	0	No
GOBP_GO:0001516	prostaglandin biosynthetic process	GOBP	0	0	0	0	No
GOBP_GO:0001539	cilium or flagellum-dependent cell motility	GOBP	0.004	0	0	0	No
GOBP_GO:0001541	ovarian follicle development	GOBP	0	0	0	0	No
GOBP_GO:0001558	regulation of cell growth	GOBP	0	0	0	0	No
GOBP_GO:0001569	branching involved in blood vessel morphogenesis	GOBP	0.105	0	0	0	No
GOBP_GO:0001578	microtubule bundle formation	GOBP	0.012	0	0	0	No
GOBP_GO:0001580	detection of chemical stimulus involved in sensory perception of bitter taste	GOBP	0.028	0	0	0	No
GOBP_GO:0001649	osteoblast differentiation	GOBP	0	0	0	0	No
GOBP_GO:0001656	metanephros development	GOBP	0.002	0	0	0	No
GOBP_GO:0001657	ureteric bud development	GOBP	0	0	0	0	No
GOBP_GO:0001658	branching involved in ureteric bud morphogenesis	GOBP	0	0	0	0	No
GOBP_GO:0001659	temperature homeostasis	GOBP	0	0	0	0	No
GOBP_GO:0001666	response to hypoxia	GOBP	-0.001	0	0	0	No
GOBP_GO:0001678	cellular glucose homeostasis	GOBP	0	0	0	0	No
GOBP_GO:0001701	in utero embryonic development	GOBP	0	0	0	0	No
GOBP_GO:0001704	formation of primary germ layer	GOBP	0.037	0	0	0	No
GOBP_GO:0001706	endoderm formation	GOBP	0.068	0	0	0	No
GOBP_GO:0001707	mesoderm formation	GOBP	0	0	0	0	No
GOBP_GO:0001708	cell fate specification	GOBP	0.001	0	0	0	No
GOBP_GO:0001709	cell fate determination	GOBP	0	0	0	0	No
GOBP_GO:0001738	morphogenesis of a polarized epithelium	GOBP	-0.013	0	0	0	No
GOBP_GO:0001754	eye photoreceptor cell differentiation	GOBP	0	0	0	0	No
GOBP_GO:0001755	neural crest cell migration	GOBP	0	0	0	0	No
GOBP_GO:0001756	somitogenesis	GOBP	0	0	0	0	No
GOBP_GO:0001763	morphogenesis of a branching structure	GOBP	0.015	0	0	0	No
GOBP_GO:0001773	myeloid dendritic cell activation	GOBP	0	0	0	0	No
GOBP_GO:0001816	cytokine production	GOBP	0.001	0	0	0	No
GOBP_GO:0001817	regulation of cytokine production	GOBP	0.001	0	0	0	No
GOBP_GO:0001818	negative regulation of cytokine production	GOBP	0	0	0	0	No
GOBP_GO:0001823	mesonephros development	GOBP	0.001	0	0	0	No
GOBP_GO:0001836	release of cytochrome c from mitochondria	GOBP	0	0	0	0	No
GOBP_GO:0001837	epithelial to mesenchymal transition	GOBP	0.003	0	0	0	No
GOBP_GO:0001838	embryonic epithelial tube formation	GOBP	0	0	0	0	No
GOBP_GO:0001841	neural tube formation	GOBP	0.002	0	0	0	No
GOBP_GO:0001843	neural tube closure	GOBP	0	0	0	0	No
GOBP_GO:0001844	protein insertion into mitochondrial membrane involved in apoptotic signaling pathway	GOBP	0	0	0	0	No
GOBP_GO:0001881	receptor recycling	GOBP	0	0	0	0	No
GOBP_GO:0001885	endothelial cell development	GOBP	0.006	0	0	0	No
GOBP_GO:0001889	liver development	GOBP	0	0	0	0	No
GOBP_GO:0001890	placenta development	GOBP	0	0	0	0	No
GOBP_GO:0001892	embryonic placenta development	GOBP	0	0	0	0	No
GOBP_GO:0001894	tissue homeostasis	GOBP	0	0	0	0	No
GOBP_GO:0001895	retina homeostasis	GOBP	0.001	0	0	0	No
GOBP_GO:0001906	cell killing	GOBP	-0.008	0	0	0	No
GOBP_GO:0001909	leukocyte mediated cytotoxicity	GOBP	-0.015	0	0	0	No
GOBP_GO:0001910	regulation of leukocyte mediated cytotoxicity	GOBP	-0.016	0	0	0	No
GOBP_GO:0001912	positive regulation of leukocyte mediated cytotoxicity	GOBP	-0.008	0	0	0	No
GOBP_GO:0001913	T cell mediated cytotoxicity	GOBP	-0.002	0	0	0	No
GOBP_GO:0001914	regulation of T cell mediated cytotoxicity	GOBP	-0.005	0	0	0	No
GOBP_GO:0001919	regulation of receptor recycling	GOBP	0	0	0	0	No
GOBP_GO:0001933	negative regulation of protein phosphorylation	GOBP	0	0	0	0	No
GOBP_GO:0001934	positive regulation of protein phosphorylation	GOBP	0	0	0	0	No
GOBP_GO:0001935	endothelial cell proliferation	GOBP	0.072	0	0	0	No
GOBP_GO:0001936	regulation of endothelial cell proliferation	GOBP	0.074	0	0	0	No
GOBP_GO:0001937	negative regulation of endothelial cell proliferation	GOBP	0.002	0	0	0	No
GOBP_GO:0001938	positive regulation of endothelial cell proliferation	GOBP	0.053	0	0	0	No
GOBP_GO:0001942	hair follicle development	GOBP	0	0	0	0	No
GOBP_GO:0001945	lymph vessel development	GOBP	0.017	0	0	0	No
GOBP_GO:0001947	heart looping	GOBP	0	0	0	0	No
GOBP_GO:0001952	regulation of cell-matrix adhesion	GOBP	0.008	0	0	0	No
GOBP_GO:0001953	negative regulation of cell-matrix adhesion	GOBP	0	0	0	0	No
GOBP_GO:0001954	positive regulation of cell-matrix adhesion	GOBP	0.003	0	0	0	No
GOBP_GO:0001960	negative regulation of cytokine-mediated signaling pathway	GOBP	0	0	0	0	No
GOBP_GO:0001961	positive regulation of cytokine-mediated signaling pathway	GOBP	0	0	0	0	No
GOBP_GO:0001963	synaptic transmission, dopaminergic	GOBP	0	0	0	0	No
GOBP_GO:0001974	blood vessel remodeling	GOBP	0	0	0	0	No
GOBP_GO:0001990	regulation of systemic arterial blood pressure by hormone	GOBP	0.004	0	0	0	No
GOBP_GO:0001991	regulation of systemic arterial blood pressure by circulatory renin-angiotensin	GOBP	0.001	0	0	0	No
GOBP_GO:0002009	morphogenesis of an epithelium	GOBP	0	0	0	0	No
GOBP_GO:0002026	regulation of the force of heart contraction	GOBP	0.003	0	0	0	No
GOBP_GO:0002027	regulation of heart rate	GOBP	0.005	0	0	0	No
GOBP_GO:0002062	chondrocyte differentiation	GOBP	0.008	0	0	0	No
GOBP_GO:0002064	epithelial cell development	GOBP	0.001	0	0	0	No
GOBP_GO:0002065	columnar/cuboidal epithelial cell differentiation	GOBP	0	0	0	0	No
GOBP_GO:0002066	columnar/cuboidal epithelial cell development	GOBP	0	0	0	0	No
GOBP_GO:0002067	glandular epithelial cell differentiation	GOBP	0.001	0	0	0	No
GOBP_GO:0002088	lens development in camera-type eye	GOBP	0	0	0	0	No
GOBP_GO:0002090	regulation of receptor internalization	GOBP	0	0	0	0	No
GOBP_GO:0002092	positive regulation of receptor internalization	GOBP	0.001	0	0	0	No
GOBP_GO:0002183	cytoplasmic translational initiation	GOBP	-0.003	0	0	0	No
GOBP_GO:0002200	somatic diversification of immune receptors	GOBP	-0.003	0	0	0	No
GOBP_GO:0002204	somatic recombination of immunoglobulin genes involved in immune response	GOBP	0	0	0	0	No
GOBP_GO:0002208	somatic diversification of immunoglobulins involved in immune response	GOBP	0	0	0	0	No
GOBP_GO:0002227	innate immune response in mucosa	GOBP	0.001	0	0	0	No
GOBP_GO:0002228	natural killer cell mediated immunity	GOBP	-0.01	0	0	0	No
GOBP_GO:0002251	organ or tissue specific immune response	GOBP	0	0	0	0	No
GOBP_GO:0002262	myeloid cell homeostasis	GOBP	-0.003	0	0	0	No
GOBP_GO:0002285	lymphocyte activation involved in immune response	GOBP	-0.001	0	0	0	No
GOBP_GO:0002287	alpha-beta T cell activation involved in immune response	GOBP	-0.005	0	0	0	No
GOBP_GO:0002292	T cell differentiation involved in immune response	GOBP	-0.005	0	0	0	No
GOBP_GO:0002293	alpha-beta T cell differentiation involved in immune response	GOBP	-0.005	0	0	0	No
GOBP_GO:0002294	CD4-positive, alpha-beta T cell differentiation involved in immune response	GOBP	0	0	0	0	No
GOBP_GO:0002312	B cell activation involved in immune response	GOBP	0	0	0	0	No
GOBP_GO:0002323	natural killer cell activation involved in immune response	GOBP	0.022	0	0	0	No
GOBP_GO:0002347	response to tumor cell	GOBP	0	0	0	0	No
GOBP_GO:0002360	T cell lineage commitment	GOBP	-0.006	0	0	0	No
GOBP_GO:0002367	cytokine production involved in immune response	GOBP	0	0	0	0	No
GOBP_GO:0002369	T cell cytokine production	GOBP	0	0	0	0	No
GOBP_GO:0002377	immunoglobulin production	GOBP	0	0	0	0	No
GOBP_GO:0002381	immunoglobulin production involved in immunoglobulin mediated immune response	GOBP	0	0	0	0	No
GOBP_GO:0002385	mucosal immune response	GOBP	0	0	0	0	No
GOBP_GO:0002407	dendritic cell chemotaxis	GOBP	-0.008	0	0	0	No
GOBP_GO:0002440	production of molecular mediator of immune response	GOBP	0	0	0	0	No
GOBP_GO:0002456	T cell mediated immunity	GOBP	-0.002	0	0	0	No
GOBP_GO:0002520	immune system development	GOBP	0	0	0	0	No
GOBP_GO:0002521	leukocyte differentiation	GOBP	-0.003	0	0	0	No
GOBP_GO:0002532	production of molecular mediator involved in inflammatory response	GOBP	0	0	0	0	No
GOBP_GO:0002534	cytokine production involved in inflammatory response	GOBP	0	0	0	0	No
GOBP_GO:0002548	monocyte chemotaxis	GOBP	0.013	0	0	0	No
GOBP_GO:0002562	somatic diversification of immune receptors via germline recombination within a single locus	GOBP	-0.003	0	0	0	No
GOBP_GO:0002573	myeloid leukocyte differentiation	GOBP	0	0	0	0	No
GOBP_GO:0002637	regulation of immunoglobulin production	GOBP	0	0	0	0	No
GOBP_GO:0002639	positive regulation of immunoglobulin production	GOBP	0	0	0	0	No
GOBP_GO:0002675	positive regulation of acute inflammatory response	GOBP	0.003	0	0	0	No
GOBP_GO:0002683	negative regulation of immune system process	GOBP	0	0	0	0	No
GOBP_GO:0002686	negative regulation of leukocyte migration	GOBP	0	0	0	0	No
GOBP_GO:0002688	regulation of leukocyte chemotaxis	GOBP	0.01	0	0	0	No
GOBP_GO:0002690	positive regulation of leukocyte chemotaxis	GOBP	0.006	0	0	0	No
GOBP_GO:0002691	regulation of cellular extravasation	GOBP	0	0	0	0	No
GOBP_GO:0002698	negative regulation of immune effector process	GOBP	0.003	0	0	0	No
GOBP_GO:0002700	regulation of production of molecular mediator of immune response	GOBP	0	0	0	0	No
GOBP_GO:0002701	negative regulation of production of molecular mediator of immune response	GOBP	0	0	0	0	No
GOBP_GO:0002702	positive regulation of production of molecular mediator of immune response	GOBP	0	0	0	0	No
GOBP_GO:0002705	positive regulation of leukocyte mediated immunity	GOBP	-0.01	0	0	0	No
GOBP_GO:0002706	regulation of lymphocyte mediated immunity	GOBP	-0.011	0	0	0	No
GOBP_GO:0002707	negative regulation of lymphocyte mediated immunity	GOBP	0	0	0	0	No
GOBP_GO:0002708	positive regulation of lymphocyte mediated immunity	GOBP	-0.002	0	0	0	No
GOBP_GO:0002709	regulation of T cell mediated immunity	GOBP	0	0	0	0	No
GOBP_GO:0002711	positive regulation of T cell mediated immunity	GOBP	0	0	0	0	No
GOBP_GO:0002712	regulation of B cell mediated immunity	GOBP	0	0	0	0	No
GOBP_GO:0002715	regulation of natural killer cell mediated immunity	GOBP	-0.006	0	0	0	No
GOBP_GO:0002717	positive regulation of natural killer cell mediated immunity	GOBP	-0.007	0	0	0	No
GOBP_GO:0002718	regulation of cytokine production involved in immune response	GOBP	0	0	0	0	No
GOBP_GO:0002719	negative regulation of cytokine production involved in immune response	GOBP	0	0	0	0	No
GOBP_GO:0002720	positive regulation of cytokine production involved in immune response	GOBP	0	0	0	0	No
GOBP_GO:0002724	regulation of T cell cytokine production	GOBP	0	0	0	0	No
GOBP_GO:0002761	regulation of myeloid leukocyte differentiation	GOBP	0	0	0	0	No
GOBP_GO:0002762	negative regulation of myeloid leukocyte differentiation	GOBP	0.001	0	0	0	No
GOBP_GO:0002763	positive regulation of myeloid leukocyte differentiation	GOBP	-0.002	0	0	0	No
GOBP_GO:0002790	peptide secretion	GOBP	0	0	0	0	No
GOBP_GO:0002791	regulation of peptide secretion	GOBP	0	0	0	0	No
GOBP_GO:0002792	negative regulation of peptide secretion	GOBP	0	0	0	0	No
GOBP_GO:0002793	positive regulation of peptide secretion	GOBP	0	0	0	0	No
GOBP_GO:0002820	negative regulation of adaptive immune response	GOBP	0	0	0	0	No
GOBP_GO:0002821	positive regulation of adaptive immune response	GOBP	0	0	0	0	No
GOBP_GO:0002822	regulation of adaptive immune response based on somatic recombination of immune receptors built from immunoglobulin superfamily domains	GOBP	-0.002	0	0	0	No
GOBP_GO:0002823	negative regulation of adaptive immune response based on somatic recombination of immune receptors built from immunoglobulin superfamily domains	GOBP	0	0	0	0	No
GOBP_GO:0002824	positive regulation of adaptive immune response based on somatic recombination of immune receptors built from immunoglobulin superfamily domains	GOBP	0	0	0	0	No
GOBP_GO:0002828	regulation of type 2 immune response	GOBP	0.001	0	0	0	No
GOBP_GO:0002831	regulation of response to biotic stimulus	GOBP	-0.002	0	0	0	No
GOBP_GO:0002832	negative regulation of response to biotic stimulus	GOBP	0	0	0	0	No
GOBP_GO:0002833	positive regulation of response to biotic stimulus	GOBP	0	0	0	0	No
GOBP_GO:0002889	regulation of immunoglobulin mediated immune response	GOBP	0	0	0	0	No
GOBP_GO:0003002	regionalization	GOBP	0	0	0	0	No
GOBP_GO:0003006	developmental process involved in reproduction	GOBP	0	0	0	0	No
GOBP_GO:0003007	heart morphogenesis	GOBP	0.033	0	0	0	No
GOBP_GO:0003009	skeletal muscle contraction	GOBP	0.003	0	0	0	No
GOBP_GO:0003014	renal system process	GOBP	0.003	0	0	0	No
GOBP_GO:0003018	vascular process in circulatory system	GOBP	0.01	0	0	0	No
GOBP_GO:0003044	regulation of systemic arterial blood pressure mediated by a chemical signal	GOBP	0.004	0	0	0	No
GOBP_GO:0003073	regulation of systemic arterial blood pressure	GOBP	0.006	0	0	0	No
GOBP_GO:0003081	regulation of systemic arterial blood pressure by renin-angiotensin	GOBP	0.001	0	0	0	No
GOBP_GO:0003091	renal water homeostasis	GOBP	0	0	0	0	No
GOBP_GO:0003143	embryonic heart tube morphogenesis	GOBP	0	0	0	0	No
GOBP_GO:0003148	outflow tract septum morphogenesis	GOBP	0.01	0	0	0	No
GOBP_GO:0003151	outflow tract morphogenesis	GOBP	0.047	0	0	0	No
GOBP_GO:0003171	atrioventricular valve development	GOBP	0.039	0	0	0	No
GOBP_GO:0003181	atrioventricular valve morphogenesis	GOBP	0.035	0	0	0	No
GOBP_GO:0003197	endocardial cushion development	GOBP	0.041	0	0	0	No
GOBP_GO:0003203	endocardial cushion morphogenesis	GOBP	0.025	0	0	0	No
GOBP_GO:0003205	cardiac chamber development	GOBP	0.024	0	0	0	No
GOBP_GO:0003206	cardiac chamber morphogenesis	GOBP	0.023	0	0	0	No
GOBP_GO:0003208	cardiac ventricle morphogenesis	GOBP	0.007	0	0	0	No
GOBP_GO:0003209	cardiac atrium morphogenesis	GOBP	0	0	0	0	No
GOBP_GO:0003229	ventricular cardiac muscle tissue development	GOBP	0.001	0	0	0	No
GOBP_GO:0003230	cardiac atrium development	GOBP	0	0	0	0	No
GOBP_GO:0003231	cardiac ventricle development	GOBP	0.009	0	0	0	No
GOBP_GO:0003254	regulation of membrane depolarization	GOBP	0	0	0	0	No
GOBP_GO:0003283	atrial septum development	GOBP	0	0	0	0	No
GOBP_GO:0003300	cardiac muscle hypertrophy	GOBP	-0.001	0	0	0	No
GOBP_GO:0003309	type B pancreatic cell differentiation	GOBP	0	0	0	0	No
GOBP_GO:0003333	amino acid transmembrane transport	GOBP	0	0	0	0	No
GOBP_GO:0003338	metanephros morphogenesis	GOBP	0	0	0	0	No
GOBP_GO:0003341	cilium movement	GOBP	0.018	0	0	0	No
GOBP_GO:0003407	neural retina development	GOBP	0.002	0	0	0	No
GOBP_GO:0005975	carbohydrate metabolic process	GOBP	0.002	0	0	0	No
GOBP_GO:0005976	polysaccharide metabolic process	GOBP	0	0	0	0	No
GOBP_GO:0005978	glycogen biosynthetic process	GOBP	0	0	0	0	No
GOBP_GO:0005979	regulation of glycogen biosynthetic process	GOBP	0	0	0	0	No
GOBP_GO:0005980	glycogen catabolic process	GOBP	0	0	0	0	No
GOBP_GO:0006040	amino sugar metabolic process	GOBP	0	0	0	0	No
GOBP_GO:0006085	acetyl-CoA biosynthetic process	GOBP	0	0	0	0	No
GOBP_GO:0006090	pyruvate metabolic process	GOBP	-0.002	0	0	0	No
GOBP_GO:0006096	glycolytic process	GOBP	-0.002	0	0	0	No
GOBP_GO:0006098	pentose-phosphate shunt	GOBP	-0.001	0	0	0	No
GOBP_GO:0006109	regulation of carbohydrate metabolic process	GOBP	0	0	0	0	No
GOBP_GO:0006110	regulation of glycolytic process	GOBP	-0.002	0	0	0	No
GOBP_GO:0006111	regulation of gluconeogenesis	GOBP	0	0	0	0	No
GOBP_GO:0006123	mitochondrial electron transport, cytochrome c to oxygen	GOBP	-0.013	0	0	0	No
GOBP_GO:0006140	regulation of nucleotide metabolic process	GOBP	0	0	0	0	No
GOBP_GO:0006163	purine nucleotide metabolic process	GOBP	0	0	0	0	No
GOBP_GO:0006164	purine nucleotide biosynthetic process	GOBP	0	0	0	0	No
GOBP_GO:0006165	nucleoside diphosphate phosphorylation	GOBP	-0.002	0	0	0	No
GOBP_GO:0006171	cAMP biosynthetic process	GOBP	0.005	0	0	0	No
GOBP_GO:0006182	cGMP biosynthetic process	GOBP	0.001	0	0	0	No
GOBP_GO:0006195	purine nucleotide catabolic process	GOBP	0	0	0	0	No
GOBP_GO:0006213	pyrimidine nucleoside metabolic process	GOBP	0	0	0	0	No
GOBP_GO:0006220	pyrimidine nucleotide metabolic process	GOBP	0	0	0	0	No
GOBP_GO:0006266	DNA ligation	GOBP	-0.002	0	0	0	No
GOBP_GO:0006275	regulation of DNA replication	GOBP	-0.001	0	0	0	No
GOBP_GO:0006282	regulation of DNA repair	GOBP	-0.005	0	0	0	No
GOBP_GO:0006283	transcription-coupled nucleotide-excision repair	GOBP	-0.046	0	0	0	No
GOBP_GO:0006284	base-excision repair	GOBP	0	0	0	0	No
GOBP_GO:0006293	nucleotide-excision repair, preincision complex stabilization	GOBP	-0.004	0	0	0	No
GOBP_GO:0006294	nucleotide-excision repair, preincision complex assembly	GOBP	-0.013	0	0	0	No
GOBP_GO:0006295	nucleotide-excision repair, DNA incision, 3'-to lesion	GOBP	-0.004	0	0	0	No
GOBP_GO:0006296	nucleotide-excision repair, DNA incision, 5'-to lesion	GOBP	-0.016	0	0	0	No
GOBP_GO:0006301	postreplication repair	GOBP	-0.01	0	0	0	No
GOBP_GO:0006304	DNA modification	GOBP	0	0	0	0	No
GOBP_GO:0006305	DNA alkylation	GOBP	0	0	0	0	No
GOBP_GO:0006306	DNA methylation	GOBP	0	0	0	0	No
GOBP_GO:0006308	DNA catabolic process	GOBP	0	0	0	0	No
GOBP_GO:0006309	apoptotic DNA fragmentation	GOBP	0	0	0	0	No
GOBP_GO:0006312	mitotic recombination	GOBP	-0.003	0	0	0	No
GOBP_GO:0006325	chromatin organization	GOBP	-0.016	0	0	0	No
GOBP_GO:0006337	nucleosome disassembly	GOBP	0	0	0	0	No
GOBP_GO:0006346	methylation-dependent chromatin silencing	GOBP	0	0	0	0	No
GOBP_GO:0006352	DNA-templated transcription, initiation	GOBP	0	0	0	0	No
GOBP_GO:0006354	DNA-templated transcription, elongation	GOBP	-0.046	0	0	0	No
GOBP_GO:0006356	regulation of transcription from RNA polymerase I promoter	GOBP	-0.002	0	0	0	No
GOBP_GO:0006359	regulation of transcription from RNA polymerase III promoter	GOBP	0	0	0	0	No
GOBP_GO:0006360	transcription from RNA polymerase I promoter	GOBP	-0.012	0	0	0	No
GOBP_GO:0006361	transcription initiation from RNA polymerase I promoter	GOBP	-0.001	0	0	0	No
GOBP_GO:0006362	transcription elongation from RNA polymerase I promoter	GOBP	-0.005	0	0	0	No
GOBP_GO:0006367	transcription initiation from RNA polymerase II promoter	GOBP	0	0	0	0	No
GOBP_GO:0006368	transcription elongation from RNA polymerase II promoter	GOBP	-0.037	0	0	0	No
GOBP_GO:0006370	7-methylguanosine mRNA capping	GOBP	-0.016	0	0	0	No
GOBP_GO:0006376	mRNA splice site selection	GOBP	-0.007	0	0	0	No
GOBP_GO:0006378	mRNA polyadenylation	GOBP	-0.006	0	0	0	No
GOBP_GO:0006379	mRNA cleavage	GOBP	0	0	0	0	No
GOBP_GO:0006383	transcription from RNA polymerase III promoter	GOBP	0	0	0	0	No
GOBP_GO:0006417	regulation of translation	GOBP	-0.018	0	0	0	No
GOBP_GO:0006446	regulation of translational initiation	GOBP	-0.015	0	0	0	No
GOBP_GO:0006469	negative regulation of protein kinase activity	GOBP	0	0	0	0	No
GOBP_GO:0006470	protein dephosphorylation	GOBP	0	0	0	0	No
GOBP_GO:0006471	protein ADP-ribosylation	GOBP	0	0	0	0	No
GOBP_GO:0006473	protein acetylation	GOBP	-0.003	0	0	0	No
GOBP_GO:0006474	N-terminal protein amino acid acetylation	GOBP	0	0	0	0	No
GOBP_GO:0006476	protein deacetylation	GOBP	0	0	0	0	No
GOBP_GO:0006479	protein methylation	GOBP	-0.01	0	0	0	No
GOBP_GO:0006482	protein demethylation	GOBP	-0.001	0	0	0	No
GOBP_GO:0006486	protein glycosylation	GOBP	0	0	0	0	No
GOBP_GO:0006487	protein N-linked glycosylation	GOBP	0.001	0	0	0	No
GOBP_GO:0006488	dolichol-linked oligosaccharide biosynthetic process	GOBP	-0.001	0	0	0	No
GOBP_GO:0006490	oligosaccharide-lipid intermediate biosynthetic process	GOBP	0	0	0	0	No
GOBP_GO:0006491	N-glycan processing	GOBP	-0.002	0	0	0	No
GOBP_GO:0006493	protein O-linked glycosylation	GOBP	0	0	0	0	No
GOBP_GO:0006497	protein lipidation	GOBP	0	0	0	0	No
GOBP_GO:0006501	C-terminal protein lipidation	GOBP	0	0	0	0	No
GOBP_GO:0006506	GPI anchor biosynthetic process	GOBP	-0.002	0	0	0	No
GOBP_GO:0006511	ubiquitin-dependent protein catabolic process	GOBP	-0.041	0	0	0	No
GOBP_GO:0006513	protein monoubiquitination	GOBP	-0.005	0	0	0	No
GOBP_GO:0006515	protein quality control for misfolded or incompletely synthesized proteins	GOBP	-0.002	0	0	0	No
GOBP_GO:0006516	glycoprotein catabolic process	GOBP	0	0	0	0	No
GOBP_GO:0006517	protein deglycosylation	GOBP	-0.001	0	0	0	No
GOBP_GO:0006555	methionine metabolic process	GOBP	0.006	0	0	0	No
GOBP_GO:0006584	catecholamine metabolic process	GOBP	0	0	0	0	No
GOBP_GO:0006586	indolalkylamine metabolic process	GOBP	0.01	0	0	0	No
GOBP_GO:0006595	polyamine metabolic process	GOBP	0	0	0	0	No
GOBP_GO:0006606	protein import into nucleus	GOBP	0	0	0	0	No
GOBP_GO:0006607	NLS-bearing protein import into nucleus	GOBP	-0.003	0	0	0	No
GOBP_GO:0006622	protein targeting to lysosome	GOBP	0	0	0	0	No
GOBP_GO:0006623	protein targeting to vacuole	GOBP	-0.004	0	0	0	No
GOBP_GO:0006625	protein targeting to peroxisome	GOBP	0	0	0	0	No
GOBP_GO:0006626	protein targeting to mitochondrion	GOBP	-0.002	0	0	0	No
GOBP_GO:0006636	unsaturated fatty acid biosynthetic process	GOBP	0	0	0	0	No
GOBP_GO:0006643	membrane lipid metabolic process	GOBP	0	0	0	0	No
GOBP_GO:0006644	phospholipid metabolic process	GOBP	0	0	0	0	No
GOBP_GO:0006650	glycerophospholipid metabolic process	GOBP	0	0	0	0	No
GOBP_GO:0006654	phosphatidic acid biosynthetic process	GOBP	0	0	0	0	No
GOBP_GO:0006656	phosphatidylcholine biosynthetic process	GOBP	0	0	0	0	No
GOBP_GO:0006658	phosphatidylserine metabolic process	GOBP	0	0	0	0	No
GOBP_GO:0006661	phosphatidylinositol biosynthetic process	GOBP	0	0	0	0	No
GOBP_GO:0006664	glycolipid metabolic process	GOBP	0	0	0	0	No
GOBP_GO:0006665	sphingolipid metabolic process	GOBP	0	0	0	0	No
GOBP_GO:0006672	ceramide metabolic process	GOBP	0	0	0	0	No
GOBP_GO:0006687	glycosphingolipid metabolic process	GOBP	0	0	0	0	No
GOBP_GO:0006688	glycosphingolipid biosynthetic process	GOBP	0	0	0	0	No
GOBP_GO:0006692	prostanoid metabolic process	GOBP	0	0	0	0	No
GOBP_GO:0006693	prostaglandin metabolic process	GOBP	0	0	0	0	No
GOBP_GO:0006700	C21-steroid hormone biosynthetic process	GOBP	0	0	0	0	No
GOBP_GO:0006704	glucocorticoid biosynthetic process	GOBP	0	0	0	0	No
GOBP_GO:0006733	oxidoreduction coenzyme metabolic process	GOBP	0	0	0	0	No
GOBP_GO:0006739	NADP metabolic process	GOBP	-0.002	0	0	0	No
GOBP_GO:0006753	nucleoside phosphate metabolic process	GOBP	0	0	0	0	No
GOBP_GO:0006754	ATP biosynthetic process	GOBP	-0.017	0	0	0	No
GOBP_GO:0006757	ATP generation from ADP	GOBP	-0.002	0	0	0	No
GOBP_GO:0006760	folic acid-containing compound metabolic process	GOBP	0.001	0	0	0	No
GOBP_GO:0006775	fat-soluble vitamin metabolic process	GOBP	0.006	0	0	0	No
GOBP_GO:0006778	porphyrin-containing compound metabolic process	GOBP	-0.001	0	0	0	No
GOBP_GO:0006779	porphyrin-containing compound biosynthetic process	GOBP	-0.003	0	0	0	No
GOBP_GO:0006783	heme biosynthetic process	GOBP	-0.002	0	0	0	No
GOBP_GO:0006801	superoxide metabolic process	GOBP	0	0	0	0	No
GOBP_GO:0006809	nitric oxide biosynthetic process	GOBP	0	0	0	0	No
GOBP_GO:0006812	cation transport	GOBP	0	0	0	0	No
GOBP_GO:0006816	calcium ion transport	GOBP	0	0	0	0	No
GOBP_GO:0006821	chloride transport	GOBP	0.003	0	0	0	No
GOBP_GO:0006826	iron ion transport	GOBP	-0.002	0	0	0	No
GOBP_GO:0006829	zinc II ion transport	GOBP	0.004	0	0	0	No
GOBP_GO:0006833	water transport	GOBP	0	0	0	0	No
GOBP_GO:0006839	mitochondrial transport	GOBP	-0.006	0	0	0	No
GOBP_GO:0006851	mitochondrial calcium ion transmembrane transport	GOBP	0	0	0	0	No
GOBP_GO:0006873	cellular ion homeostasis	GOBP	0	0	0	0	No
GOBP_GO:0006874	cellular calcium ion homeostasis	GOBP	0	0	0	0	No
GOBP_GO:0006875	cellular metal ion homeostasis	GOBP	0	0	0	0	No
GOBP_GO:0006879	cellular iron ion homeostasis	GOBP	-0.001	0	0	0	No
GOBP_GO:0006882	cellular zinc ion homeostasis	GOBP	0.004	0	0	0	No
GOBP_GO:0006885	regulation of pH	GOBP	0	0	0	0	No
GOBP_GO:0006886	intracellular protein transport	GOBP	-0.012	0	0	0	No
GOBP_GO:0006888	ER to Golgi vesicle-mediated transport	GOBP	-0.012	0	0	0	No
GOBP_GO:0006890	retrograde vesicle-mediated transport, Golgi to ER	GOBP	-0.007	0	0	0	No
GOBP_GO:0006891	intra-Golgi vesicle-mediated transport	GOBP	-0.002	0	0	0	No
GOBP_GO:0006892	post-Golgi vesicle-mediated transport	GOBP	-0.012	0	0	0	No
GOBP_GO:0006893	Golgi to plasma membrane transport	GOBP	0	0	0	0	No
GOBP_GO:0006895	Golgi to endosome transport	GOBP	0	0	0	0	No
GOBP_GO:0006897	endocytosis	GOBP	0.002	0	0	0	No
GOBP_GO:0006900	vesicle budding from membrane	GOBP	-0.011	0	0	0	No
GOBP_GO:0006901	vesicle coating	GOBP	-0.007	0	0	0	No
GOBP_GO:0006903	vesicle targeting	GOBP	-0.009	0	0	0	No
GOBP_GO:0006904	vesicle docking involved in exocytosis	GOBP	0	0	0	0	No
GOBP_GO:0006907	pinocytosis	GOBP	0	0	0	0	No
GOBP_GO:0006911	phagocytosis, engulfment	GOBP	0.002	0	0	0	No
GOBP_GO:0006913	nucleocytoplasmic transport	GOBP	-0.005	0	0	0	No
GOBP_GO:0006914	autophagy	GOBP	-0.004	0	0	0	No
GOBP_GO:0006919	activation of cysteine-type endopeptidase activity involved in apoptotic process	GOBP	0	0	0	0	No
GOBP_GO:0006921	cellular component disassembly involved in execution phase of apoptosis	GOBP	0	0	0	0	No
GOBP_GO:0006929	substrate-dependent cell migration	GOBP	0	0	0	0	No
GOBP_GO:0006940	regulation of smooth muscle contraction	GOBP	0	0	0	0	No
GOBP_GO:0006941	striated muscle contraction	GOBP	0.011	0	0	0	No
GOBP_GO:0006942	regulation of striated muscle contraction	GOBP	0	0	0	0	No
GOBP_GO:0006949	syncytium formation	GOBP	0	0	0	0	No
GOBP_GO:0006953	acute-phase response	GOBP	0.021	0	0	0	No
GOBP_GO:0006970	response to osmotic stress	GOBP	0	0	0	0	No
GOBP_GO:0006974	cellular response to DNA damage stimulus	GOBP	-0.017	0	0	0	No
GOBP_GO:0006978	DNA damage response, signal transduction by p53 class mediator resulting in transcription of p21 class mediator	GOBP	0	0	0	0	No
GOBP_GO:0006979	response to oxidative stress	GOBP	0	0	0	0	No
GOBP_GO:0006997	nucleus organization	GOBP	-0.005	0	0	0	No
GOBP_GO:0006999	nuclear pore organization	GOBP	-0.008	0	0	0	No
GOBP_GO:0007004	telomere maintenance via telomerase	GOBP	-0.019	0	0	0	No
GOBP_GO:0007005	mitochondrion organization	GOBP	-0.022	0	0	0	No
GOBP_GO:0007006	mitochondrial membrane organization	GOBP	-0.026	0	0	0	No
GOBP_GO:0007007	inner mitochondrial membrane organization	GOBP	-0.05	0	0	0	No
GOBP_GO:0007010	cytoskeleton organization	GOBP	0	0	0	0	No
GOBP_GO:0007015	actin filament organization	GOBP	0.001	0	0	0	No
GOBP_GO:0007017	microtubule-based process	GOBP	0	0	0	0	No
GOBP_GO:0007018	microtubule-based movement	GOBP	0.006	0	0	0	No
GOBP_GO:0007019	microtubule depolymerization	GOBP	0	0	0	0	No
GOBP_GO:0007020	microtubule nucleation	GOBP	0	0	0	0	No
GOBP_GO:0007029	endoplasmic reticulum organization	GOBP	0	0	0	0	No
GOBP_GO:0007030	Golgi organization	GOBP	-0.013	0	0	0	No
GOBP_GO:0007031	peroxisome organization	GOBP	0	0	0	0	No
GOBP_GO:0007032	endosome organization	GOBP	-0.003	0	0	0	No
GOBP_GO:0007033	vacuole organization	GOBP	-0.007	0	0	0	No
GOBP_GO:0007034	vacuolar transport	GOBP	-0.012	0	0	0	No
GOBP_GO:0007035	vacuolar acidification	GOBP	-0.004	0	0	0	No
GOBP_GO:0007040	lysosome organization	GOBP	-0.001	0	0	0	No
GOBP_GO:0007041	lysosomal transport	GOBP	-0.009	0	0	0	No
GOBP_GO:0007050	cell cycle arrest	GOBP	0	0	0	0	No
GOBP_GO:0007063	regulation of sister chromatid cohesion	GOBP	0	0	0	0	No
GOBP_GO:0007064	mitotic sister chromatid cohesion	GOBP	-0.004	0	0	0	No
GOBP_GO:0007080	mitotic metaphase plate congression	GOBP	-0.019	0	0	0	No
GOBP_GO:0007088	regulation of mitotic nuclear division	GOBP	0	0	0	0	No
GOBP_GO:0007099	centriole replication	GOBP	-0.004	0	0	0	No
GOBP_GO:0007100	mitotic centrosome separation	GOBP	0	0	0	0	No
GOBP_GO:0007129	synapsis	GOBP	-0.003	0	0	0	No
GOBP_GO:0007140	male meiotic nuclear division	GOBP	0	0	0	0	No
GOBP_GO:0007155	cell adhesion	GOBP	0.007	0	0	0	No
GOBP_GO:0007162	negative regulation of cell adhesion	GOBP	0.002	0	0	0	No
GOBP_GO:0007163	establishment or maintenance of cell polarity	GOBP	0	0	0	0	No
GOBP_GO:0007167	enzyme linked receptor protein signaling pathway	GOBP	0	0	0	0	No
GOBP_GO:0007169	transmembrane receptor protein tyrosine kinase signaling pathway	GOBP	0	0	0	0	No
GOBP_GO:0007173	epidermal growth factor receptor signaling pathway	GOBP	0	0	0	0	No
GOBP_GO:0007176	regulation of epidermal growth factor-activated receptor activity	GOBP	0	0	0	0	No
GOBP_GO:0007178	transmembrane receptor protein serine/threonine kinase signaling pathway	GOBP	0.008	0	0	0	No
GOBP_GO:0007179	transforming growth factor beta receptor signaling pathway	GOBP	0.005	0	0	0	No
GOBP_GO:0007184	SMAD protein import into nucleus	GOBP	0	0	0	0	No
GOBP_GO:0007187	G-protein coupled receptor signaling pathway, coupled to cyclic nucleotide second messenger	GOBP	0.022	0	0	0	No
GOBP_GO:0007188	adenylate cyclase-modulating G-protein coupled receptor signaling pathway	GOBP	0.012	0	0	0	No
GOBP_GO:0007190	activation of adenylate cyclase activity	GOBP	0	0	0	0	No
GOBP_GO:0007194	negative regulation of adenylate cyclase activity	GOBP	0	0	0	0	No
GOBP_GO:0007200	phospholipase C-activating G-protein coupled receptor signaling pathway	GOBP	0.018	0	0	0	No
GOBP_GO:0007202	activation of phospholipase C activity	GOBP	0.003	0	0	0	No
GOBP_GO:0007204	positive regulation of cytosolic calcium ion concentration	GOBP	0.001	0	0	0	No
GOBP_GO:0007212	dopamine receptor signaling pathway	GOBP	0	0	0	0	No
GOBP_GO:0007213	G-protein coupled acetylcholine receptor signaling pathway	GOBP	0	0	0	0	No
GOBP_GO:0007218	neuropeptide signaling pathway	GOBP	0.016	0	0	0	No
GOBP_GO:0007219	Notch signaling pathway	GOBP	0.004	0	0	0	No
GOBP_GO:0007223	Wnt signaling pathway, calcium modulating pathway	GOBP	0	0	0	0	No
GOBP_GO:0007224	smoothened signaling pathway	GOBP	0.003	0	0	0	No
GOBP_GO:0007249	I-kappaB kinase/NF-kappaB signaling	GOBP	-0.002	0	0	0	No
GOBP_GO:0007254	JNK cascade	GOBP	0	0	0	0	No
GOBP_GO:0007257	activation of JUN kinase activity	GOBP	0	0	0	0	No
GOBP_GO:0007259	JAK-STAT cascade	GOBP	0	0	0	0	No
GOBP_GO:0007260	tyrosine phosphorylation of STAT protein	GOBP	0	0	0	0	No
GOBP_GO:0007264	small GTPase mediated signal transduction	GOBP	0.001	0	0	0	No
GOBP_GO:0007265	Ras protein signal transduction	GOBP	0	0	0	0	No
GOBP_GO:0007266	Rho protein signal transduction	GOBP	0	0	0	0	No
GOBP_GO:0007271	synaptic transmission, cholinergic	GOBP	0.001	0	0	0	No
GOBP_GO:0007272	ensheathment of neurons	GOBP	0	0	0	0	No
GOBP_GO:0007274	neuromuscular synaptic transmission	GOBP	0.002	0	0	0	No
GOBP_GO:0007276	gamete generation	GOBP	0	0	0	0	No
GOBP_GO:0007281	germ cell development	GOBP	0	0	0	0	No
GOBP_GO:0007283	spermatogenesis	GOBP	0	0	0	0	No
GOBP_GO:0007286	spermatid development	GOBP	0	0	0	0	No
GOBP_GO:0007292	female gamete generation	GOBP	0	0	0	0	No
GOBP_GO:0007338	single fertilization	GOBP	0.009	0	0	0	No
GOBP_GO:0007339	binding of sperm to zona pellucida	GOBP	0	0	0	0	No
GOBP_GO:0007340	acrosome reaction	GOBP	0	0	0	0	No
GOBP_GO:0007346	regulation of mitotic cell cycle	GOBP	-0.007	0	0	0	No
GOBP_GO:0007368	determination of left/right symmetry	GOBP	0.004	0	0	0	No
GOBP_GO:0007369	gastrulation	GOBP	0.017	0	0	0	No
GOBP_GO:0007389	pattern specification process	GOBP	0	0	0	0	No
GOBP_GO:0007405	neuroblast proliferation	GOBP	0	0	0	0	No
GOBP_GO:0007417	central nervous system development	GOBP	0.005	0	0	0	No
GOBP_GO:0007420	brain development	GOBP	0	0	0	0	No
GOBP_GO:0007422	peripheral nervous system development	GOBP	0	0	0	0	No
GOBP_GO:0007492	endoderm development	GOBP	0.066	0	0	0	No
GOBP_GO:0007498	mesoderm development	GOBP	0	0	0	0	No
GOBP_GO:0007507	heart development	GOBP	0.052	0	0	0	No
GOBP_GO:0007517	muscle organ development	GOBP	0.006	0	0	0	No
GOBP_GO:0007519	skeletal muscle tissue development	GOBP	0.007	0	0	0	No
GOBP_GO:0007520	myoblast fusion	GOBP	0.002	0	0	0	No
GOBP_GO:0007528	neuromuscular junction development	GOBP	0	0	0	0	No
GOBP_GO:0007548	sex differentiation	GOBP	0	0	0	0	No
GOBP_GO:0007565	female pregnancy	GOBP	0	0	0	0	No
GOBP_GO:0007566	embryo implantation	GOBP	0	0	0	0	No
GOBP_GO:0007568	aging	GOBP	0	0	0	0	No
GOBP_GO:0007584	response to nutrient	GOBP	0	0	0	0	No
GOBP_GO:0007585	respiratory gaseous exchange	GOBP	0	0	0	0	No
GOBP_GO:0007586	digestion	GOBP	0.006	0	0	0	No
GOBP_GO:0007588	excretion	GOBP	0.001	0	0	0	No
GOBP_GO:0007589	body fluid secretion	GOBP	0	0	0	0	No
GOBP_GO:0007596	blood coagulation	GOBP	0.001	0	0	0	No
GOBP_GO:0007599	hemostasis	GOBP	0	0	0	0	No
GOBP_GO:0007600	sensory perception	GOBP	0.083	0	0	0	No
GOBP_GO:0007601	visual perception	GOBP	0.002	0	0	0	No
GOBP_GO:0007602	phototransduction	GOBP	0	0	0	0	No
GOBP_GO:0007603	phototransduction, visible light	GOBP	0	0	0	0	No
GOBP_GO:0007605	sensory perception of sound	GOBP	0.008	0	0	0	No
GOBP_GO:0007616	long-term memory	GOBP	0	0	0	0	No
GOBP_GO:0007622	rhythmic behavior	GOBP	0	0	0	0	No
GOBP_GO:0007623	circadian rhythm	GOBP	0	0	0	0	No
GOBP_GO:0007626	locomotory behavior	GOBP	0	0	0	0	No
GOBP_GO:0007631	feeding behavior	GOBP	0.014	0	0	0	No
GOBP_GO:0008037	cell recognition	GOBP	0.001	0	0	0	No
GOBP_GO:0008053	mitochondrial fusion	GOBP	0	0	0	0	No
GOBP_GO:0008064	regulation of actin polymerization or depolymerization	GOBP	0	0	0	0	No
GOBP_GO:0008088	axo-dendritic transport	GOBP	0	0	0	0	No
GOBP_GO:0008089	anterograde axonal transport	GOBP	0	0	0	0	No
GOBP_GO:0008154	actin polymerization or depolymerization	GOBP	0	0	0	0	No
GOBP_GO:0008156	negative regulation of DNA replication	GOBP	-0.004	0	0	0	No
GOBP_GO:0008207	C21-steroid hormone metabolic process	GOBP	0	0	0	0	No
GOBP_GO:0008209	androgen metabolic process	GOBP	0.029	0	0	0	No
GOBP_GO:0008210	estrogen metabolic process	GOBP	0.012	0	0	0	No
GOBP_GO:0008211	glucocorticoid metabolic process	GOBP	0	0	0	0	No
GOBP_GO:0008213	protein alkylation	GOBP	-0.01	0	0	0	No
GOBP_GO:0008214	protein dealkylation	GOBP	-0.001	0	0	0	No
GOBP_GO:0008217	regulation of blood pressure	GOBP	0.008	0	0	0	No
GOBP_GO:0008277	regulation of G-protein coupled receptor protein signaling pathway	GOBP	0	0	0	0	No
GOBP_GO:0008284	positive regulation of cell proliferation	GOBP	0	0	0	0	No
GOBP_GO:0008285	negative regulation of cell proliferation	GOBP	0	0	0	0	No
GOBP_GO:0008286	insulin receptor signaling pathway	GOBP	0	0	0	0	No
GOBP_GO:0008333	endosome to lysosome transport	GOBP	-0.002	0	0	0	No
GOBP_GO:0008347	glial cell migration	GOBP	0	0	0	0	No
GOBP_GO:0008360	regulation of cell shape	GOBP	0	0	0	0	No
GOBP_GO:0008366	axon ensheathment	GOBP	0	0	0	0	No
GOBP_GO:0008406	gonad development	GOBP	0	0	0	0	No
GOBP_GO:0008543	fibroblast growth factor receptor signaling pathway	GOBP	0	0	0	0	No
GOBP_GO:0008544	epidermis development	GOBP	0.032	0	0	0	No
GOBP_GO:0008584	male gonad development	GOBP	0	0	0	0	No
GOBP_GO:0008585	female gonad development	GOBP	0	0	0	0	No
GOBP_GO:0008589	regulation of smoothened signaling pathway	GOBP	0.003	0	0	0	No
GOBP_GO:0008593	regulation of Notch signaling pathway	GOBP	0	0	0	0	No
GOBP_GO:0008610	lipid biosynthetic process	GOBP	0	0	0	0	No
GOBP_GO:0008625	extrinsic apoptotic signaling pathway via death domain receptors	GOBP	0	0	0	0	No
GOBP_GO:0008631	intrinsic apoptotic signaling pathway in response to oxidative stress	GOBP	0	0	0	0	No
GOBP_GO:0008637	apoptotic mitochondrial changes	GOBP	0	0	0	0	No
GOBP_GO:0008643	carbohydrate transport	GOBP	0	0	0	0	No
GOBP_GO:0008645	hexose transport	GOBP	0	0	0	0	No
GOBP_GO:0008654	phospholipid biosynthetic process	GOBP	0	0	0	0	No
GOBP_GO:0009067	aspartate family amino acid biosynthetic process	GOBP	0.004	0	0	0	No
GOBP_GO:0009100	glycoprotein metabolic process	GOBP	0	0	0	0	No
GOBP_GO:0009101	glycoprotein biosynthetic process	GOBP	0	0	0	0	No
GOBP_GO:0009116	nucleoside metabolic process	GOBP	0	0	0	0	No
GOBP_GO:0009117	nucleotide metabolic process	GOBP	0	0	0	0	No
GOBP_GO:0009119	ribonucleoside metabolic process	GOBP	-0.006	0	0	0	No
GOBP_GO:0009124	nucleoside monophosphate biosynthetic process	GOBP	-0.015	0	0	0	No
GOBP_GO:0009127	purine nucleoside monophosphate biosynthetic process	GOBP	-0.014	0	0	0	No
GOBP_GO:0009132	nucleoside diphosphate metabolic process	GOBP	0	0	0	0	No
GOBP_GO:0009135	purine nucleoside diphosphate metabolic process	GOBP	0	0	0	0	No
GOBP_GO:0009142	nucleoside triphosphate biosynthetic process	GOBP	-0.014	0	0	0	No
GOBP_GO:0009145	purine nucleoside triphosphate biosynthetic process	GOBP	-0.018	0	0	0	No
GOBP_GO:0009150	purine ribonucleotide metabolic process	GOBP	0	0	0	0	No
GOBP_GO:0009152	purine ribonucleotide biosynthetic process	GOBP	0	0	0	0	No
GOBP_GO:0009154	purine ribonucleotide catabolic process	GOBP	0	0	0	0	No
GOBP_GO:0009156	ribonucleoside monophosphate biosynthetic process	GOBP	-0.014	0	0	0	No
GOBP_GO:0009163	nucleoside biosynthetic process	GOBP	-0.001	0	0	0	No
GOBP_GO:0009164	nucleoside catabolic process	GOBP	0	0	0	0	No
GOBP_GO:0009165	nucleotide biosynthetic process	GOBP	0	0	0	0	No
GOBP_GO:0009166	nucleotide catabolic process	GOBP	0	0	0	0	No
GOBP_GO:0009168	purine ribonucleoside monophosphate biosynthetic process	GOBP	-0.014	0	0	0	No
GOBP_GO:0009179	purine ribonucleoside diphosphate metabolic process	GOBP	0	0	0	0	No
GOBP_GO:0009185	ribonucleoside diphosphate metabolic process	GOBP	-0.002	0	0	0	No
GOBP_GO:0009187	cyclic nucleotide metabolic process	GOBP	0.003	0	0	0	No
GOBP_GO:0009190	cyclic nucleotide biosynthetic process	GOBP	0.015	0	0	0	No
GOBP_GO:0009201	ribonucleoside triphosphate biosynthetic process	GOBP	-0.018	0	0	0	No
GOBP_GO:0009206	purine ribonucleoside triphosphate biosynthetic process	GOBP	-0.018	0	0	0	No
GOBP_GO:0009219	pyrimidine deoxyribonucleotide metabolic process	GOBP	0	0	0	0	No
GOBP_GO:0009225	nucleotide-sugar metabolic process	GOBP	0	0	0	0	No
GOBP_GO:0009226	nucleotide-sugar biosynthetic process	GOBP	0	0	0	0	No
GOBP_GO:0009235	cobalamin metabolic process	GOBP	0	0	0	0	No
GOBP_GO:0009247	glycolipid biosynthetic process	GOBP	0	0	0	0	No
GOBP_GO:0009250	glucan biosynthetic process	GOBP	0	0	0	0	No
GOBP_GO:0009251	glucan catabolic process	GOBP	0	0	0	0	No
GOBP_GO:0009259	ribonucleotide metabolic process	GOBP	0	0	0	0	No
GOBP_GO:0009260	ribonucleotide biosynthetic process	GOBP	0	0	0	0	No
GOBP_GO:0009261	ribonucleotide catabolic process	GOBP	0	0	0	0	No
GOBP_GO:0009262	deoxyribonucleotide metabolic process	GOBP	0	0	0	0	No
GOBP_GO:0009264	deoxyribonucleotide catabolic process	GOBP	0	0	0	0	No
GOBP_GO:0009266	response to temperature stimulus	GOBP	-0.004	0	0	0	No
GOBP_GO:0009267	cellular response to starvation	GOBP	0	0	0	0	No
GOBP_GO:0009268	response to pH	GOBP	0	0	0	0	No
GOBP_GO:0009299	mRNA transcription	GOBP	0	0	0	0	No
GOBP_GO:0009301	snRNA transcription	GOBP	-0.019	0	0	0	No
GOBP_GO:0009303	rRNA transcription	GOBP	-0.002	0	0	0	No
GOBP_GO:0009306	protein secretion	GOBP	0	0	0	0	No
GOBP_GO:0009309	amine biosynthetic process	GOBP	0	0	0	0	No
GOBP_GO:0009311	oligosaccharide metabolic process	GOBP	0	0	0	0	No
GOBP_GO:0009314	response to radiation	GOBP	0	0	0	0	No
GOBP_GO:0009394	2'-deoxyribonucleotide metabolic process	GOBP	0	0	0	0	No
GOBP_GO:0009408	response to heat	GOBP	-0.005	0	0	0	No
GOBP_GO:0009409	response to cold	GOBP	0	0	0	0	No
GOBP_GO:0009411	response to UV	GOBP	0	0	0	0	No
GOBP_GO:0009416	response to light stimulus	GOBP	0	0	0	0	No
GOBP_GO:0009435	NAD biosynthetic process	GOBP	0.001	0	0	0	No
GOBP_GO:0009452	7-methylguanosine RNA capping	GOBP	-0.016	0	0	0	No
GOBP_GO:0009566	fertilization	GOBP	0.007	0	0	0	No
GOBP_GO:0009581	detection of external stimulus	GOBP	0.002	0	0	0	No
GOBP_GO:0009582	detection of abiotic stimulus	GOBP	0.005	0	0	0	No
GOBP_GO:0009583	detection of light stimulus	GOBP	0.003	0	0	0	No
GOBP_GO:0009584	detection of visible light	GOBP	0.003	0	0	0	No
GOBP_GO:0009595	detection of biotic stimulus	GOBP	0.004	0	0	0	No
GOBP_GO:0009611	response to wounding	GOBP	0	0	0	0	No
GOBP_GO:0009612	response to mechanical stimulus	GOBP	0	0	0	0	No
GOBP_GO:0009620	response to fungus	GOBP	0.008	0	0	0	No
GOBP_GO:0009628	response to abiotic stimulus	GOBP	0	0	0	0	No
GOBP_GO:0009636	response to toxic substance	GOBP	0	0	0	0	No
GOBP_GO:0009648	photoperiodism	GOBP	0	0	0	0	No
GOBP_GO:0009649	entrainment of circadian clock	GOBP	0	0	0	0	No
GOBP_GO:0009712	catechol-containing compound metabolic process	GOBP	0	0	0	0	No
GOBP_GO:0009719	response to endogenous stimulus	GOBP	0	0	0	0	No
GOBP_GO:0009725	response to hormone	GOBP	0	0	0	0	No
GOBP_GO:0009743	response to carbohydrate	GOBP	0	0	0	0	No
GOBP_GO:0009746	response to hexose	GOBP	0	0	0	0	No
GOBP_GO:0009749	response to glucose	GOBP	0	0	0	0	No
GOBP_GO:0009755	hormone-mediated signaling pathway	GOBP	0	0	0	0	No
GOBP_GO:0009790	embryo development	GOBP	0.004	0	0	0	No
GOBP_GO:0009792	embryo development ending in birth or egg hatching	GOBP	0	0	0	0	No
GOBP_GO:0009798	axis specification	GOBP	0	0	0	0	No
GOBP_GO:0009799	specification of symmetry	GOBP	0.003	0	0	0	No
GOBP_GO:0009855	determination of bilateral symmetry	GOBP	0.003	0	0	0	No
GOBP_GO:0009880	embryonic pattern specification	GOBP	0	0	0	0	No
GOBP_GO:0009887	animal organ morphogenesis	GOBP	0	0	0	0	No
GOBP_GO:0009894	regulation of catabolic process	GOBP	-0.012	0	0	0	No
GOBP_GO:0009895	negative regulation of catabolic process	GOBP	0	0	0	0	No
GOBP_GO:0009896	positive regulation of catabolic process	GOBP	-0.004	0	0	0	No
GOBP_GO:0009913	epidermal cell differentiation	GOBP	0.041	0	0	0	No
GOBP_GO:0009914	hormone transport	GOBP	0	0	0	0	No
GOBP_GO:0009948	anterior/posterior axis specification	GOBP	0	0	0	0	No
GOBP_GO:0009952	anterior/posterior pattern specification	GOBP	0	0	0	0	No
GOBP_GO:0009953	dorsal/ventral pattern formation	GOBP	0	0	0	0	No
GOBP_GO:0009968	negative regulation of signal transduction	GOBP	0	0	0	0	No
GOBP_GO:0009988	cell-cell recognition	GOBP	0	0	0	0	No
GOBP_GO:0009991	response to extracellular stimulus	GOBP	0	0	0	0	No
GOBP_GO:0010001	glial cell differentiation	GOBP	0	0	0	0	No
GOBP_GO:0010002	cardioblast differentiation	GOBP	0	0	0	0	No
GOBP_GO:0010035	response to inorganic substance	GOBP	0	0	0	0	No
GOBP_GO:0010038	response to metal ion	GOBP	0	0	0	0	No
GOBP_GO:0010043	response to zinc ion	GOBP	-0.001	0	0	0	No
GOBP_GO:0010165	response to X-ray	GOBP	0	0	0	0	No
GOBP_GO:0010171	body morphogenesis	GOBP	0.003	0	0	0	No
GOBP_GO:0010212	response to ionizing radiation	GOBP	-0.003	0	0	0	No
GOBP_GO:0010243	response to organonitrogen compound	GOBP	0	0	0	0	No
GOBP_GO:0010256	endomembrane system organization	GOBP	-0.01	0	0	0	No
GOBP_GO:0010324	membrane invagination	GOBP	0	0	0	0	No
GOBP_GO:0010332	response to gamma radiation	GOBP	0	0	0	0	No
GOBP_GO:0010390	histone monoubiquitination	GOBP	-0.004	0	0	0	No
GOBP_GO:0010453	regulation of cell fate commitment	GOBP	0	0	0	0	No
GOBP_GO:0010458	exit from mitosis	GOBP	0	0	0	0	No
GOBP_GO:0010463	mesenchymal cell proliferation	GOBP	0	0	0	0	No
GOBP_GO:0010464	regulation of mesenchymal cell proliferation	GOBP	0	0	0	0	No
GOBP_GO:0010466	negative regulation of peptidase activity	GOBP	0	0	0	0	No
GOBP_GO:0010469	regulation of receptor activity	GOBP	0	0	0	0	No
GOBP_GO:0010470	regulation of gastrulation	GOBP	0	0	0	0	No
GOBP_GO:0010498	proteasomal protein catabolic process	GOBP	-0.037	0	0	0	No
GOBP_GO:0010506	regulation of autophagy	GOBP	-0.001	0	0	0	No
GOBP_GO:0010507	negative regulation of autophagy	GOBP	0	0	0	0	No
GOBP_GO:0010508	positive regulation of autophagy	GOBP	0	0	0	0	No
GOBP_GO:0010517	regulation of phospholipase activity	GOBP	0.009	0	0	0	No
GOBP_GO:0010518	positive regulation of phospholipase activity	GOBP	0.005	0	0	0	No
GOBP_GO:0010524	positive regulation of calcium ion transport into cytosol	GOBP	0	0	0	0	No
GOBP_GO:0010528	regulation of transposition	GOBP	0	0	0	0	No
GOBP_GO:0010529	negative regulation of transposition	GOBP	0	0	0	0	No
GOBP_GO:0010543	regulation of platelet activation	GOBP	0.001	0	0	0	No
GOBP_GO:0010559	regulation of glycoprotein biosynthetic process	GOBP	0	0	0	0	No
GOBP_GO:0010560	positive regulation of glycoprotein biosynthetic process	GOBP	0	0	0	0	No
GOBP_GO:0010562	positive regulation of phosphorus metabolic process	GOBP	0	0	0	0	No
GOBP_GO:0010563	negative regulation of phosphorus metabolic process	GOBP	0	0	0	0	No
GOBP_GO:0010564	regulation of cell cycle process	GOBP	-0.009	0	0	0	No
GOBP_GO:0010565	regulation of cellular ketone metabolic process	GOBP	0.002	0	0	0	No
GOBP_GO:0010569	regulation of double-strand break repair via homologous recombination	GOBP	0	0	0	0	No
GOBP_GO:0010573	vascular endothelial growth factor production	GOBP	0.002	0	0	0	No
GOBP_GO:0010574	regulation of vascular endothelial growth factor production	GOBP	0.003	0	0	0	No
GOBP_GO:0010575	positive regulation of vascular endothelial growth factor production	GOBP	0.001	0	0	0	No
GOBP_GO:0010586	miRNA metabolic process	GOBP	0	0	0	0	No
GOBP_GO:0010591	regulation of lamellipodium assembly	GOBP	0	0	0	0	No
GOBP_GO:0010596	negative regulation of endothelial cell migration	GOBP	0.009	0	0	0	No
GOBP_GO:0010611	regulation of cardiac muscle hypertrophy	GOBP	0	0	0	0	No
GOBP_GO:0010613	positive regulation of cardiac muscle hypertrophy	GOBP	0	0	0	0	No
GOBP_GO:0010633	negative regulation of epithelial cell migration	GOBP	0.005	0	0	0	No
GOBP_GO:0010638	positive regulation of organelle organization	GOBP	0	0	0	0	No
GOBP_GO:0010639	negative regulation of organelle organization	GOBP	0	0	0	0	No
GOBP_GO:0010648	negative regulation of cell communication	GOBP	0	0	0	0	No
GOBP_GO:0010657	muscle cell apoptotic process	GOBP	0	0	0	0	No
GOBP_GO:0010660	regulation of muscle cell apoptotic process	GOBP	0	0	0	0	No
GOBP_GO:0010676	positive regulation of cellular carbohydrate metabolic process	GOBP	0	0	0	0	No
GOBP_GO:0010677	negative regulation of cellular carbohydrate metabolic process	GOBP	0	0	0	0	No
GOBP_GO:0010712	regulation of collagen metabolic process	GOBP	0	0	0	0	No
GOBP_GO:0010717	regulation of epithelial to mesenchymal transition	GOBP	0.007	0	0	0	No
GOBP_GO:0010719	negative regulation of epithelial to mesenchymal transition	GOBP	0	0	0	0	No
GOBP_GO:0010721	negative regulation of cell development	GOBP	0.001	0	0	0	No
GOBP_GO:0010737	protein kinase A signaling	GOBP	0	0	0	0	No
GOBP_GO:0010738	regulation of protein kinase A signaling	GOBP	0	0	0	0	No
GOBP_GO:0010742	macrophage derived foam cell differentiation	GOBP	0.002	0	0	0	No
GOBP_GO:0010743	regulation of macrophage derived foam cell differentiation	GOBP	0.005	0	0	0	No
GOBP_GO:0010744	positive regulation of macrophage derived foam cell differentiation	GOBP	0	0	0	0	No
GOBP_GO:0010761	fibroblast migration	GOBP	0	0	0	0	No
GOBP_GO:0010765	positive regulation of sodium ion transport	GOBP	0.002	0	0	0	No
GOBP_GO:0010771	negative regulation of cell morphogenesis involved in differentiation	GOBP	0.003	0	0	0	No
GOBP_GO:0010799	regulation of peptidyl-threonine phosphorylation	GOBP	0	0	0	0	No
GOBP_GO:0010800	positive regulation of peptidyl-threonine phosphorylation	GOBP	0	0	0	0	No
GOBP_GO:0010801	negative regulation of peptidyl-threonine phosphorylation	GOBP	0	0	0	0	No
GOBP_GO:0010803	regulation of tumor necrosis factor-mediated signaling pathway	GOBP	0	0	0	0	No
GOBP_GO:0010804	negative regulation of tumor necrosis factor-mediated signaling pathway	GOBP	0	0	0	0	No
GOBP_GO:0010810	regulation of cell-substrate adhesion	GOBP	0.007	0	0	0	No
GOBP_GO:0010811	positive regulation of cell-substrate adhesion	GOBP	0.001	0	0	0	No
GOBP_GO:0010812	negative regulation of cell-substrate adhesion	GOBP	0	0	0	0	No
GOBP_GO:0010817	regulation of hormone levels	GOBP	0.007	0	0	0	No
GOBP_GO:0010818	T cell chemotaxis	GOBP	-0.002	0	0	0	No
GOBP_GO:0010821	regulation of mitochondrion organization	GOBP	0	0	0	0	No
GOBP_GO:0010822	positive regulation of mitochondrion organization	GOBP	0	0	0	0	No
GOBP_GO:0010823	negative regulation of mitochondrion organization	GOBP	0	0	0	0	No
GOBP_GO:0010824	regulation of centrosome duplication	GOBP	0	0	0	0	No
GOBP_GO:0010827	regulation of glucose transport	GOBP	0.001	0	0	0	No
GOBP_GO:0010828	positive regulation of glucose transport	GOBP	0.001	0	0	0	No
GOBP_GO:0010830	regulation of myotube differentiation	GOBP	0	0	0	0	No
GOBP_GO:0010831	positive regulation of myotube differentiation	GOBP	0	0	0	0	No
GOBP_GO:0010833	telomere maintenance via telomere lengthening	GOBP	-0.016	0	0	0	No
GOBP_GO:0010837	regulation of keratinocyte proliferation	GOBP	0	0	0	0	No
GOBP_GO:0010862	positive regulation of pathway-restricted SMAD protein phosphorylation	GOBP	0	0	0	0	No
GOBP_GO:0010863	positive regulation of phospholipase C activity	GOBP	0.005	0	0	0	No
GOBP_GO:0010869	regulation of receptor biosynthetic process	GOBP	0.002	0	0	0	No
GOBP_GO:0010883	regulation of lipid storage	GOBP	0	0	0	0	No
GOBP_GO:0010884	positive regulation of lipid storage	GOBP	0	0	0	0	No
GOBP_GO:0010894	negative regulation of steroid biosynthetic process	GOBP	0	0	0	0	No
GOBP_GO:0010907	positive regulation of glucose metabolic process	GOBP	0	0	0	0	No
GOBP_GO:0010921	regulation of phosphatase activity	GOBP	0	0	0	0	No
GOBP_GO:0010922	positive regulation of phosphatase activity	GOBP	0	0	0	0	No
GOBP_GO:0010923	negative regulation of phosphatase activity	GOBP	0	0	0	0	No
GOBP_GO:0010927	cellular component assembly involved in morphogenesis	GOBP	0.011	0	0	0	No
GOBP_GO:0010939	regulation of necrotic cell death	GOBP	0	0	0	0	No
GOBP_GO:0010942	positive regulation of cell death	GOBP	0	0	0	0	No
GOBP_GO:0010951	negative regulation of endopeptidase activity	GOBP	0	0	0	0	No
GOBP_GO:0010954	positive regulation of protein processing	GOBP	0	0	0	0	No
GOBP_GO:0010955	negative regulation of protein processing	GOBP	0	0	0	0	No
GOBP_GO:0010962	regulation of glucan biosynthetic process	GOBP	0	0	0	0	No
GOBP_GO:0010970	transport along microtubule	GOBP	-0.001	0	0	0	No
GOBP_GO:0010971	positive regulation of G2/M transition of mitotic cell cycle	GOBP	0	0	0	0	No
GOBP_GO:0014015	positive regulation of gliogenesis	GOBP	0	0	0	0	No
GOBP_GO:0014020	primary neural tube formation	GOBP	0	0	0	0	No
GOBP_GO:0014031	mesenchymal cell development	GOBP	0	0	0	0	No
GOBP_GO:0014032	neural crest cell development	GOBP	0	0	0	0	No
GOBP_GO:0014033	neural crest cell differentiation	GOBP	0	0	0	0	No
GOBP_GO:0014046	dopamine secretion	GOBP	0	0	0	0	No
GOBP_GO:0014059	regulation of dopamine secretion	GOBP	0	0	0	0	No
GOBP_GO:0014070	response to organic cyclic compound	GOBP	0	0	0	0	No
GOBP_GO:0014074	response to purine-containing compound	GOBP	0.001	0	0	0	No
GOBP_GO:0014706	striated muscle tissue development	GOBP	0.005	0	0	0	No
GOBP_GO:0014742	positive regulation of muscle hypertrophy	GOBP	0	0	0	0	No
GOBP_GO:0014743	regulation of muscle hypertrophy	GOBP	0	0	0	0	No
GOBP_GO:0014812	muscle cell migration	GOBP	0.022	0	0	0	No
GOBP_GO:0014888	striated muscle adaptation	GOBP	0	0	0	0	No
GOBP_GO:0014896	muscle hypertrophy	GOBP	0	0	0	0	No
GOBP_GO:0014897	striated muscle hypertrophy	GOBP	-0.001	0	0	0	No
GOBP_GO:0014902	myotube differentiation	GOBP	0	0	0	0	No
GOBP_GO:0014904	myotube cell development	GOBP	0	0	0	0	No
GOBP_GO:0014909	smooth muscle cell migration	GOBP	0.035	0	0	0	No
GOBP_GO:0014910	regulation of smooth muscle cell migration	GOBP	0.035	0	0	0	No
GOBP_GO:0015695	organic cation transport	GOBP	0	0	0	0	No
GOBP_GO:0015696	ammonium transport	GOBP	0	0	0	0	No
GOBP_GO:0015698	inorganic anion transport	GOBP	0.001	0	0	0	No
GOBP_GO:0015701	bicarbonate transport	GOBP	0	0	0	0	No
GOBP_GO:0015748	organophosphate ester transport	GOBP	0.01	0	0	0	No
GOBP_GO:0015749	monosaccharide transport	GOBP	0	0	0	0	No
GOBP_GO:0015758	glucose transport	GOBP	0.001	0	0	0	No
GOBP_GO:0015804	neutral amino acid transport	GOBP	0	0	0	0	No
GOBP_GO:0015807	L-amino acid transport	GOBP	0	0	0	0	No
GOBP_GO:0015837	amine transport	GOBP	0.005	0	0	0	No
GOBP_GO:0015844	monoamine transport	GOBP	0.003	0	0	0	No
GOBP_GO:0015872	dopamine transport	GOBP	0	0	0	0	No
GOBP_GO:0015908	fatty acid transport	GOBP	0.002	0	0	0	No
GOBP_GO:0015909	long-chain fatty acid transport	GOBP	0	0	0	0	No
GOBP_GO:0015914	phospholipid transport	GOBP	0.018	0	0	0	No
GOBP_GO:0015949	nucleobase-containing small molecule interconversion	GOBP	-0.002	0	0	0	No
GOBP_GO:0015985	energy coupled proton transport, down electrochemical gradient	GOBP	-0.03	0	0	0	No
GOBP_GO:0015986	ATP synthesis coupled proton transport	GOBP	-0.03	0	0	0	No
GOBP_GO:0015992	proton transport	GOBP	-0.015	0	0	0	No
GOBP_GO:0016049	cell growth	GOBP	0	0	0	0	No
GOBP_GO:0016050	vesicle organization	GOBP	-0.002	0	0	0	No
GOBP_GO:0016051	carbohydrate biosynthetic process	GOBP	0	0	0	0	No
GOBP_GO:0016052	carbohydrate catabolic process	GOBP	0	0	0	0	No
GOBP_GO:0016055	Wnt signaling pathway	GOBP	0	0	0	0	No
GOBP_GO:0016056	rhodopsin mediated signaling pathway	GOBP	0	0	0	0	No
GOBP_GO:0016075	rRNA catabolic process	GOBP	0	0	0	0	No
GOBP_GO:0016137	glycoside metabolic process	GOBP	0.001	0	0	0	No
GOBP_GO:0016180	snRNA processing	GOBP	-0.004	0	0	0	No
GOBP_GO:0016197	endosomal transport	GOBP	-0.017	0	0	0	No
GOBP_GO:0016202	regulation of striated muscle tissue development	GOBP	0	0	0	0	No
GOBP_GO:0016226	iron-sulfur cluster assembly	GOBP	-0.003	0	0	0	No
GOBP_GO:0016233	telomere capping	GOBP	-0.005	0	0	0	No
GOBP_GO:0016239	positive regulation of macroautophagy	GOBP	0	0	0	0	No
GOBP_GO:0016242	negative regulation of macroautophagy	GOBP	0	0	0	0	No
GOBP_GO:0016254	preassembly of GPI anchor in ER membrane	GOBP	0	0	0	0	No
GOBP_GO:0016266	O-glycan processing	GOBP	0.001	0	0	0	No
GOBP_GO:0016311	dephosphorylation	GOBP	0	0	0	0	No
GOBP_GO:0016331	morphogenesis of embryonic epithelium	GOBP	0.001	0	0	0	No
GOBP_GO:0016338	calcium-independent cell-cell adhesion via plasma membrane cell-adhesion molecules	GOBP	0.001	0	0	0	No
GOBP_GO:0016441	posttranscriptional gene silencing	GOBP	-0.014	0	0	0	No
GOBP_GO:0016444	somatic cell DNA recombination	GOBP	-0.003	0	0	0	No
GOBP_GO:0016445	somatic diversification of immunoglobulins	GOBP	-0.002	0	0	0	No
GOBP_GO:0016447	somatic recombination of immunoglobulin gene segments	GOBP	0	0	0	0	No
GOBP_GO:0016486	peptide hormone processing	GOBP	0.001	0	0	0	No
GOBP_GO:0016525	negative regulation of angiogenesis	GOBP	0.035	0	0	0	No
GOBP_GO:0016567	protein ubiquitination	GOBP	-0.008	0	0	0	No
GOBP_GO:0016569	covalent chromatin modification	GOBP	-0.014	0	0	0	No
GOBP_GO:0016570	histone modification	GOBP	-0.021	0	0	0	No
GOBP_GO:0016571	histone methylation	GOBP	-0.001	0	0	0	No
GOBP_GO:0016572	histone phosphorylation	GOBP	0	0	0	0	No
GOBP_GO:0016574	histone ubiquitination	GOBP	-0.005	0	0	0	No
GOBP_GO:0016575	histone deacetylation	GOBP	-0.001	0	0	0	No
GOBP_GO:0016577	histone demethylation	GOBP	0	0	0	0	No
GOBP_GO:0016578	histone deubiquitination	GOBP	0	0	0	0	No
GOBP_GO:0016579	protein deubiquitination	GOBP	-0.028	0	0	0	No
GOBP_GO:0016601	Rac protein signal transduction	GOBP	0	0	0	0	No
GOBP_GO:0017015	regulation of transforming growth factor beta receptor signaling pathway	GOBP	0	0	0	0	No
GOBP_GO:0017038	protein import	GOBP	0	0	0	0	No
GOBP_GO:0017145	stem cell division	GOBP	0	0	0	0	No
GOBP_GO:0017148	negative regulation of translation	GOBP	-0.012	0	0	0	No
GOBP_GO:0017157	regulation of exocytosis	GOBP	0	0	0	0	No
GOBP_GO:0018022	peptidyl-lysine methylation	GOBP	-0.009	0	0	0	No
GOBP_GO:0018023	peptidyl-lysine trimethylation	GOBP	0	0	0	0	No
GOBP_GO:0018105	peptidyl-serine phosphorylation	GOBP	0	0	0	0	No
GOBP_GO:0018107	peptidyl-threonine phosphorylation	GOBP	0	0	0	0	No
GOBP_GO:0018108	peptidyl-tyrosine phosphorylation	GOBP	0.002	0	0	0	No
GOBP_GO:0018126	protein hydroxylation	GOBP	0.002	0	0	0	No
GOBP_GO:0018146	keratan sulfate biosynthetic process	GOBP	0	0	0	0	No
GOBP_GO:0018149	peptide cross-linking	GOBP	0.014	0	0	0	No
GOBP_GO:0018193	peptidyl-amino acid modification	GOBP	0	0	0	0	No
GOBP_GO:0018195	peptidyl-arginine modification	GOBP	0	0	0	0	No
GOBP_GO:0018196	peptidyl-asparagine modification	GOBP	0	0	0	0	No
GOBP_GO:0018198	peptidyl-cysteine modification	GOBP	0	0	0	0	No
GOBP_GO:0018205	peptidyl-lysine modification	GOBP	-0.014	0	0	0	No
GOBP_GO:0018209	peptidyl-serine modification	GOBP	0	0	0	0	No
GOBP_GO:0018210	peptidyl-threonine modification	GOBP	0	0	0	0	No
GOBP_GO:0018212	peptidyl-tyrosine modification	GOBP	0.002	0	0	0	No
GOBP_GO:0018279	protein N-linked glycosylation via asparagine	GOBP	0.001	0	0	0	No
GOBP_GO:0018345	protein palmitoylation	GOBP	0	0	0	0	No
GOBP_GO:0018410	C-terminal protein amino acid modification	GOBP	0	0	0	0	No
GOBP_GO:0018958	phenol-containing compound metabolic process	GOBP	0.002	0	0	0	No
GOBP_GO:0019048	modulation by virus of host morphology or physiology	GOBP	0	0	0	0	No
GOBP_GO:0019054	modulation by virus of host process	GOBP	0	0	0	0	No
GOBP_GO:0019058	viral life cycle	GOBP	-0.006	0	0	0	No
GOBP_GO:0019068	virion assembly	GOBP	-0.003	0	0	0	No
GOBP_GO:0019076	viral release from host cell	GOBP	0	0	0	0	No
GOBP_GO:0019079	viral genome replication	GOBP	0	0	0	0	No
GOBP_GO:0019229	regulation of vasoconstriction	GOBP	0.004	0	0	0	No
GOBP_GO:0019233	sensory perception of pain	GOBP	0	0	0	0	No
GOBP_GO:0019320	hexose catabolic process	GOBP	0.002	0	0	0	No
GOBP_GO:0019359	nicotinamide nucleotide biosynthetic process	GOBP	0.001	0	0	0	No
GOBP_GO:0019362	pyridine nucleotide metabolic process	GOBP	0	0	0	0	No
GOBP_GO:0019363	pyridine nucleotide biosynthetic process	GOBP	0.001	0	0	0	No
GOBP_GO:0019370	leukotriene biosynthetic process	GOBP	0	0	0	0	No
GOBP_GO:0019372	lipoxygenase pathway	GOBP	0	0	0	0	No
GOBP_GO:0019637	organophosphate metabolic process	GOBP	0	0	0	0	No
GOBP_GO:0019674	NAD metabolic process	GOBP	0	0	0	0	No
GOBP_GO:0019682	glyceraldehyde-3-phosphate metabolic process	GOBP	-0.002	0	0	0	No
GOBP_GO:0019692	deoxyribose phosphate metabolic process	GOBP	0	0	0	0	No
GOBP_GO:0019693	ribose phosphate metabolic process	GOBP	0	0	0	0	No
GOBP_GO:0019722	calcium-mediated signaling	GOBP	0	0	0	0	No
GOBP_GO:0019725	cellular homeostasis	GOBP	0	0	0	0	No
GOBP_GO:0019730	antimicrobial humoral response	GOBP	0.014	0	0	0	No
GOBP_GO:0019731	antibacterial humoral response	GOBP	0.003	0	0	0	No
GOBP_GO:0019748	secondary metabolic process	GOBP	0.008	0	0	0	No
GOBP_GO:0019751	polyol metabolic process	GOBP	0	0	0	0	No
GOBP_GO:0019827	stem cell population maintenance	GOBP	0	0	0	0	No
GOBP_GO:0019915	lipid storage	GOBP	0.001	0	0	0	No
GOBP_GO:0019933	cAMP-mediated signaling	GOBP	0	0	0	0	No
GOBP_GO:0019935	cyclic-nucleotide-mediated signaling	GOBP	0	0	0	0	No
GOBP_GO:0019941	modification-dependent protein catabolic process	GOBP	-0.041	0	0	0	No
GOBP_GO:0019953	sexual reproduction	GOBP	0.004	0	0	0	No
GOBP_GO:0019985	translesion synthesis	GOBP	-0.005	0	0	0	No
GOBP_GO:0021510	spinal cord development	GOBP	0.001	0	0	0	No
GOBP_GO:0021536	diencephalon development	GOBP	0.003	0	0	0	No
GOBP_GO:0021545	cranial nerve development	GOBP	0.002	0	0	0	No
GOBP_GO:0021549	cerebellum development	GOBP	0	0	0	0	No
GOBP_GO:0021575	hindbrain morphogenesis	GOBP	0.002	0	0	0	No
GOBP_GO:0021587	cerebellum morphogenesis	GOBP	0.002	0	0	0	No
GOBP_GO:0021675	nerve development	GOBP	0.002	0	0	0	No
GOBP_GO:0021695	cerebellar cortex development	GOBP	0.002	0	0	0	No
GOBP_GO:0021700	developmental maturation	GOBP	0	0	0	0	No
GOBP_GO:0021762	substantia nigra development	GOBP	0	0	0	0	No
GOBP_GO:0021782	glial cell development	GOBP	0	0	0	0	No
GOBP_GO:0021885	forebrain cell migration	GOBP	0	0	0	0	No
GOBP_GO:0021915	neural tube development	GOBP	0.003	0	0	0	No
GOBP_GO:0022029	telencephalon cell migration	GOBP	0	0	0	0	No
GOBP_GO:0022037	metencephalon development	GOBP	0	0	0	0	No
GOBP_GO:0022400	regulation of rhodopsin mediated signaling pathway	GOBP	0	0	0	0	No
GOBP_GO:0022404	molting cycle process	GOBP	0	0	0	0	No
GOBP_GO:0022405	hair cycle process	GOBP	0	0	0	0	No
GOBP_GO:0022406	membrane docking	GOBP	-0.01	0	0	0	No
GOBP_GO:0022408	negative regulation of cell-cell adhesion	GOBP	0.002	0	0	0	No
GOBP_GO:0022411	cellular component disassembly	GOBP	0	0	0	0	No
GOBP_GO:0022412	cellular process involved in reproduction in multicellular organism	GOBP	0.003	0	0	0	No
GOBP_GO:0022414	reproductive process	GOBP	0	0	0	0	No
GOBP_GO:0022600	digestive system process	GOBP	0.006	0	0	0	No
GOBP_GO:0022602	ovulation cycle process	GOBP	0	0	0	0	No
GOBP_GO:0022603	regulation of anatomical structure morphogenesis	GOBP	0	0	0	0	No
GOBP_GO:0022610	biological adhesion	GOBP	0.007	0	0	0	No
GOBP_GO:0022617	extracellular matrix disassembly	GOBP	0.062	0	0	0	No
GOBP_GO:0023014	signal transduction by protein phosphorylation	GOBP	0	0	0	0	No
GOBP_GO:0023057	negative regulation of signaling	GOBP	0	0	0	0	No
GOBP_GO:0030003	cellular cation homeostasis	GOBP	0	0	0	0	No
GOBP_GO:0030004	cellular monovalent inorganic cation homeostasis	GOBP	0	0	0	0	No
GOBP_GO:0030010	establishment of cell polarity	GOBP	0	0	0	0	No
GOBP_GO:0030029	actin filament-based process	GOBP	0.002	0	0	0	No
GOBP_GO:0030031	cell projection assembly	GOBP	0	0	0	0	No
GOBP_GO:0030032	lamellipodium assembly	GOBP	0	0	0	0	No
GOBP_GO:0030036	actin cytoskeleton organization	GOBP	0.002	0	0	0	No
GOBP_GO:0030038	contractile actin filament bundle assembly	GOBP	0.004	0	0	0	No
GOBP_GO:0030041	actin filament polymerization	GOBP	0	0	0	0	No
GOBP_GO:0030042	actin filament depolymerization	GOBP	0	0	0	0	No
GOBP_GO:0030048	actin filament-based movement	GOBP	0.007	0	0	0	No
GOBP_GO:0030049	muscle filament sliding	GOBP	-0.006	0	0	0	No
GOBP_GO:0030072	peptide hormone secretion	GOBP	0	0	0	0	No
GOBP_GO:0030073	insulin secretion	GOBP	0	0	0	0	No
GOBP_GO:0030097	hemopoiesis	GOBP	0	0	0	0	No
GOBP_GO:0030099	myeloid cell differentiation	GOBP	0	0	0	0	No
GOBP_GO:0030100	regulation of endocytosis	GOBP	0	0	0	0	No
GOBP_GO:0030101	natural killer cell activation	GOBP	0.008	0	0	0	No
GOBP_GO:0030104	water homeostasis	GOBP	0	0	0	0	No
GOBP_GO:0030111	regulation of Wnt signaling pathway	GOBP	0	0	0	0	No
GOBP_GO:0030148	sphingolipid biosynthetic process	GOBP	0	0	0	0	No
GOBP_GO:0030149	sphingolipid catabolic process	GOBP	0	0	0	0	No
GOBP_GO:0030150	protein import into mitochondrial matrix	GOBP	-0.008	0	0	0	No
GOBP_GO:0030162	regulation of proteolysis	GOBP	0	0	0	0	No
GOBP_GO:0030163	protein catabolic process	GOBP	-0.012	0	0	0	No
GOBP_GO:0030177	positive regulation of Wnt signaling pathway	GOBP	0	0	0	0	No
GOBP_GO:0030178	negative regulation of Wnt signaling pathway	GOBP	0	0	0	0	No
GOBP_GO:0030183	B cell differentiation	GOBP	0	0	0	0	No
GOBP_GO:0030199	collagen fibril organization	GOBP	0.107	0	0	0	No
GOBP_GO:0030212	hyaluronan metabolic process	GOBP	0	0	0	0	No
GOBP_GO:0030214	hyaluronan catabolic process	GOBP	0	0	0	0	No
GOBP_GO:0030216	keratinocyte differentiation	GOBP	0.04	0	0	0	No
GOBP_GO:0030218	erythrocyte differentiation	GOBP	-0.002	0	0	0	No
GOBP_GO:0030219	megakaryocyte differentiation	GOBP	-0.004	0	0	0	No
GOBP_GO:0030224	monocyte differentiation	GOBP	0.002	0	0	0	No
GOBP_GO:0030225	macrophage differentiation	GOBP	0	0	0	0	No
GOBP_GO:0030239	myofibril assembly	GOBP	0.006	0	0	0	No
GOBP_GO:0030262	apoptotic nuclear changes	GOBP	0	0	0	0	No
GOBP_GO:0030279	negative regulation of ossification	GOBP	0	0	0	0	No
GOBP_GO:0030282	bone mineralization	GOBP	0.001	0	0	0	No
GOBP_GO:0030307	positive regulation of cell growth	GOBP	0	0	0	0	No
GOBP_GO:0030308	negative regulation of cell growth	GOBP	0	0	0	0	No
GOBP_GO:0030316	osteoclast differentiation	GOBP	0	0	0	0	No
GOBP_GO:0030317	flagellated sperm motility	GOBP	0.004	0	0	0	No
GOBP_GO:0030322	stabilization of membrane potential	GOBP	0.001	0	0	0	No
GOBP_GO:0030323	respiratory tube development	GOBP	0.003	0	0	0	No
GOBP_GO:0030324	lung development	GOBP	0.002	0	0	0	No
GOBP_GO:0030326	embryonic limb morphogenesis	GOBP	0.006	0	0	0	No
GOBP_GO:0030330	DNA damage response, signal transduction by p53 class mediator	GOBP	0	0	0	0	No
GOBP_GO:0030335	positive regulation of cell migration	GOBP	0.015	0	0	0	No
GOBP_GO:0030488	tRNA methylation	GOBP	-0.005	0	0	0	No
GOBP_GO:0030500	regulation of bone mineralization	GOBP	0	0	0	0	No
GOBP_GO:0030501	positive regulation of bone mineralization	GOBP	0.003	0	0	0	No
GOBP_GO:0030509	BMP signaling pathway	GOBP	0.006	0	0	0	No
GOBP_GO:0030510	regulation of BMP signaling pathway	GOBP	0.013	0	0	0	No
GOBP_GO:0030511	positive regulation of transforming growth factor beta receptor signaling pathway	GOBP	0	0	0	0	No
GOBP_GO:0030512	negative regulation of transforming growth factor beta receptor signaling pathway	GOBP	0	0	0	0	No
GOBP_GO:0030513	positive regulation of BMP signaling pathway	GOBP	0.007	0	0	0	No
GOBP_GO:0030514	negative regulation of BMP signaling pathway	GOBP	0.001	0	0	0	No
GOBP_GO:0030518	intracellular steroid hormone receptor signaling pathway	GOBP	0	0	0	0	No
GOBP_GO:0030520	intracellular estrogen receptor signaling pathway	GOBP	0	0	0	0	No
GOBP_GO:0030521	androgen receptor signaling pathway	GOBP	0	0	0	0	No
GOBP_GO:0030522	intracellular receptor signaling pathway	GOBP	0	0	0	0	No
GOBP_GO:0030641	regulation of cellular pH	GOBP	0	0	0	0	No
GOBP_GO:0030705	cytoskeleton-dependent intracellular transport	GOBP	0.002	0	0	0	No
GOBP_GO:0030730	sequestering of triglyceride	GOBP	0	0	0	0	No
GOBP_GO:0030799	regulation of cyclic nucleotide metabolic process	GOBP	0.003	0	0	0	No
GOBP_GO:0030800	negative regulation of cyclic nucleotide metabolic process	GOBP	0	0	0	0	No
GOBP_GO:0030801	positive regulation of cyclic nucleotide metabolic process	GOBP	0.001	0	0	0	No
GOBP_GO:0030802	regulation of cyclic nucleotide biosynthetic process	GOBP	0.006	0	0	0	No
GOBP_GO:0030803	negative regulation of cyclic nucleotide biosynthetic process	GOBP	0.001	0	0	0	No
GOBP_GO:0030804	positive regulation of cyclic nucleotide biosynthetic process	GOBP	0.002	0	0	0	No
GOBP_GO:0030808	regulation of nucleotide biosynthetic process	GOBP	0.004	0	0	0	No
GOBP_GO:0030809	negative regulation of nucleotide biosynthetic process	GOBP	0	0	0	0	No
GOBP_GO:0030810	positive regulation of nucleotide biosynthetic process	GOBP	0	0	0	0	No
GOBP_GO:0030814	regulation of cAMP metabolic process	GOBP	0.001	0	0	0	No
GOBP_GO:0030815	negative regulation of cAMP metabolic process	GOBP	0.001	0	0	0	No
GOBP_GO:0030816	positive regulation of cAMP metabolic process	GOBP	0.001	0	0	0	No
GOBP_GO:0030817	regulation of cAMP biosynthetic process	GOBP	0.005	0	0	0	No
GOBP_GO:0030818	negative regulation of cAMP biosynthetic process	GOBP	0.004	0	0	0	No
GOBP_GO:0030819	positive regulation of cAMP biosynthetic process	GOBP	0	0	0	0	No
GOBP_GO:0030832	regulation of actin filament length	GOBP	0	0	0	0	No
GOBP_GO:0030833	regulation of actin filament polymerization	GOBP	0	0	0	0	No
GOBP_GO:0030834	regulation of actin filament depolymerization	GOBP	0	0	0	0	No
GOBP_GO:0030837	negative regulation of actin filament polymerization	GOBP	0	0	0	0	No
GOBP_GO:0030838	positive regulation of actin filament polymerization	GOBP	0	0	0	0	No
GOBP_GO:0030851	granulocyte differentiation	GOBP	0.001	0	0	0	No
GOBP_GO:0030855	epithelial cell differentiation	GOBP	0.005	0	0	0	No
GOBP_GO:0030856	regulation of epithelial cell differentiation	GOBP	0	0	0	0	No
GOBP_GO:0030857	negative regulation of epithelial cell differentiation	GOBP	0	0	0	0	No
GOBP_GO:0030858	positive regulation of epithelial cell differentiation	GOBP	0	0	0	0	No
[truncated: 4,890 more rows]
