# Supplementary material for: Identifying gene function and module connections by the integration of multispecies expression compendia
Source: HighWire-hosted journal article supplement (doi:10.1101/gr.251983.119), 2019-11-21
Supplement: Supplemental_Table_S5.xlsx [file Supplemental_Table_S5.xlsx]

## Sheet: mitochondrial.all.gene_3.specie
Supplemental Table S5. G-MAD results on respiratory electron transport in human, mouse and rat.
	Homo sapiens			Mus musculus			Rattus norvegicus
Human gene symbol	Gene id	GMAS	Gene present in module	Gene id	GMAS	Gene present in module	Gene id	GMAS	Gene present in module
UQCR10	29796	0.966	Yes	66152	0.954	Yes	685322	0.962	No
COX6B1	1340	0.959	Yes	110323	0.941	No	N/A	N/A	N/A
NDUFA1	4694	0.978	Yes	54405	0.945	Yes	363441	0.915	Yes
NDUFA6	4700	0.956	Yes	67130	0.942	Yes	315167	0.937	Yes
NDUFB5	4711	0.916	Yes	66046	0.966	Yes	294964	0.921	Yes
NDUFB9	4715	0.93	Yes	66218	0.964	Yes	299954	0.905	Yes
UQCRH	7388	0.918	Yes	66576	0.955	Yes	366448	0.924	Yes
NDUFB2	4708	0.969	Yes	68198	0.965	Yes	362344	0.857	Yes
NDUFS3	4722	0.945	Yes	68349	0.945	Yes	295923	0.896	Yes
NDUFA13	51079	0.934	Yes	67184	0.87	Yes	100911483	0.978	Yes
COX5B	1329	0.981	Yes	12859	0.885	No	94194	0.915	No
NDUFA2	4695	0.93	Yes	17991	0.968	Yes	291660	0.882	Yes
COX7A2	1347	0.944	No	12866	0.927	No	29507	0.896	No
NDUFA3	4696	0.935	Yes	66091	0.909	Yes	N/A	N/A	N/A
NDUFB7	4713	0.911	Yes	66916	0.969	Yes	361385	0.885	Yes
COX6C	1345	0.944	Yes	12864	0.885	No	54322	0.932	No
NDUFB11	54539	0.94	Yes	104130	0.918	Yes	299310	0.897	Yes
ATP5G1	516	0.918	No	N/A	N/A	N/A	N/A	N/A	N/A
COX7B	1349	0.95	Yes	66142	0.899	No	303393	0.903	No
NDUFC1	4717	0.913	Yes	66377	0.96	Yes	689938	0.878	Yes
NDUFB10	4716	0.908	Yes	68342	0.969	Yes	681418	0.873	Yes
C14orf2	9556	0.93	No	70257	0.901	No	N/A	N/A	N/A
UQCR11	10975	0.863	Yes	66594	0.967	Yes	N/A	N/A	N/A
NDUFA12	55967	0.953	Yes	66414	0.907	Yes	299739	0.884	Yes
NDUFA11	126328	0.94	Yes	69875	0.881	Yes	301123	0.916	Yes
ATP5H	10476	0.879	No	71679	0.913	No	641434	0.944	No
ATP5J	522	0.949	No	11957	0.906	No	94271	0.875	No
NDUFAB1	4706	0.952	Yes	70316	0.843	Yes	293453	0.933	Yes
ATP5O	539	0.914	No	28080	0.926	No	192241	0.887	No
ATP5L	10632	0.921	No	27425	0.922	No	300677	0.883	No
NDUFV2	4729	0.859	Yes	72900	0.929	Yes	81728	0.933	Yes
NDUFA8	4702	0.958	Yes	68375	0.927	Yes	296658	0.835	Yes
NDUFB3	4709	0.911	Yes	66495	0.966	Yes	301427	0.839	Yes
NDUFB6	4712	0.84	Yes	230075	0.963	Yes	297990	0.906	Yes
NDUFA4	4697	0.951	Yes	17992	0.891	No	681024	0.866	No
UQCRB	7381	0.872	Yes	67530	0.952	Yes	362897	0.879	Yes
NDUFB8	4714	0.9	Yes	67264	0.94	Yes	293991	0.86	Yes
ATP5J2	9551	0.884	No	57423	0.914	No	N/A	N/A	N/A
NDUFS5	4725	0.938	Yes	595136	0.921	Yes	362588	0.825	Yes
NDUFA9	4704	0.894	Yes	66108	0.912	Yes	362440	0.876	Yes
NDUFS6	4726	0.826	Yes	407785	0.961	Yes	N/A	N/A	N/A
NDUFS8	4728	0.862	Yes	225887	0.972	Yes	293652	0.836	Yes
NDUFA7	4701	0.949	Yes	66416	0.944	Yes	299643	0.769	Yes
C19orf70	125988	0.894	No	224904	0.874	No	N/A	N/A	N/A
SDHB	6390	0.822	Yes	67680	0.945	No	298596	0.884	No
NDUFS7	374291	0.851	Yes	75406	0.909	Yes	362837	0.882	Yes
NDUFS4	4724	0.846	Yes	17993	0.904	Yes	N/A	N/A	N/A
CYC1	1537	0.901	Yes	66445	0.891	Yes	300047	0.816	Yes
UQCRHL	440567	0.727	No	66576	0.955	Yes	366448	0.924	Yes
COX4I1	1327	0.836	Yes	12857	0.902	No	29445	0.856	No
NDUFB4	4710	0.78	Yes	68194	0.911	Yes	288088	0.882	Yes
UQCRFS1	7386	0.937	Yes	66694	0.816	Yes	291103	0.819	Yes
ATP5I	521	0.949	No	11958	0.937	No	140608	0.679	No
ROMO1	140823	0.887	No	67067	0.889	No	679572	0.788	No
ETFB	2109	0.843	Yes	110826	0.916	Yes	292845	0.799	Yes
USMG5	84833	0.794	No	66477	0.933	No	171069	0.831	No
MRPS28	28957	0.805	No	66230	0.852	No	689025	0.892	No
ATP5F1	515	0.823	No	11950	0.868	No	171375	0.847	No
COX8A	1351	0.962	Yes	12868	0.771	No	171335	0.801	No
SUCLG1	8802	0.788	No	56451	0.878	No	114597	0.867	No
BOLA3	388962	0.893	No	78653	0.86	No	297388	0.776	No
COX7C	1350	0.969	Yes	12867	0.711	No	100188937	0.846	No
ATP5E	514	0.72	No	67126	0.925	No	245958	0.881	No
ATP5G3	518	0.858	No	228033	0.786	No	114630	0.877	No
UQCRQ	27089	0.979	Yes	22272	0.713	Yes	497902	0.818	Yes
COX14	84987	0.925	Yes	66379	0.815	No	681219	0.765	No
MRPL22	29093	0.869	No	216767	0.853	No	287302	0.777	No
CHCHD1	118487	0.861	No	66121	0.865	No	361005	0.773	No
MRPS33	51650	0.88	No	14548	0.843	No	296995	0.774	No
NDUFC2	4718	0.679	Yes	68197	0.925	Yes	293130	0.892	Yes
RPL26L1	51121	0.829	No	N/A	N/A	N/A	N/A	N/A	N/A
COX6A1	1337	0.917	Yes	12861	0.784	No	25282	0.776	No
NAA38	84316	0.848	No	78304	0.906	No	287429	0.723	No
TIMM8B	26521	0.826	No	30057	0.895	No	64372	0.755	No
PARK7	11315	0.853	No	57320	0.773	No	117287	0.832	No
COX5A	9377	0.945	Yes	12858	0.874	No	252934	0.638	No
MRPS16	51021	0.704	No	66242	0.866	No	688912	0.879	No
UQCRC1	7384	0.772	Yes	22273	0.799	Yes	301011	0.866	Yes
NDUFAF2	91942	0.837	Yes	75597	0.776	Yes	N/A	N/A	N/A
MRPS36	92259	0.779	No	66128	0.834	No	N/A	N/A	N/A
NDUFV1	4723	0.624	Yes	17995	0.933	Yes	293655	0.846	Yes
MRPL34	64981	0.831	No	94065	0.825	No	290632	0.743	No
ACOT13	55856	0.75	No	66834	0.851	No	291135	0.797	No
HINT2	84681	0.84	No	68917	0.823	No	313491	0.732	No
ETFA	2108	0.814	Yes	110842	0.838	Yes	300726	0.743	Yes
SNRPD2	6633	0.797	No	N/A	N/A	N/A	N/A	N/A	N/A
TOMM7	54543	0.688	No	66169	0.885	No	685620	0.816	No
HSPE1	3336	0.796	No	N/A	N/A	N/A	N/A	N/A	N/A
TMEM126A	84233	0.848	No	66271	0.766	No	293113	0.772	No
UQCRC2	7385	0.771	Yes	67003	0.875	Yes	293448	0.737	Yes
CISD1	55847	0.761	No	52637	0.838	No	294362	0.783	No
MRPL13	28998	0.811	No	68537	0.825	No	299938	0.744	No
SNRPG	6637	0.792	No	N/A	N/A	N/A	N/A	N/A	N/A
ELOB	6923	0.792	No	N/A	N/A	N/A	N/A	N/A	N/A
MRPL53	116540	0.746	No	68499	0.859	No	362388	0.77	No
NOP10	55505	0.784	No	66181	0.753	No	691534	0.825	No
ATP5C1	509	0.808	No	11949	0.766	No	N/A	N/A	N/A
NDUFB1	4707	0.787	Yes	N/A	N/A	N/A	N/A	N/A	N/A
PHPT1	29085	0.717	No	75454	0.761	No	296571	0.88	No
FMC1	154791	0.629	No	66117	0.908	No	500087	0.821	No
MPC2	25874	0.725	No	70456	0.724	No	100359982	0.899	No
UQCC2	84300	0.762	No	67267	0.837	No	361805	0.744	No
MRPS21	54460	0.663	No	66292	0.85	No	689432	0.828	No
HSD17B10	3028	0.832	No	15108	0.788	No	63864	0.717	No
MDH2	4191	0.728	No	17448	0.782	No	81829	0.827	No
ATP5D	513	0.682	No	66043	0.839	No	245965	0.814	No
MRPS24	64951	0.899	No	64660	0.858	No	498406	0.577	No
NDUFS2	4720	0.65	Yes	226646	0.843	Yes	289218	0.834	Yes
NDUFA5	4698	0.455	Yes	68202	0.961	Yes	25488	0.909	Yes
LAMTOR2	28956	0.827	No	83409	0.761	No	295234	0.733	No
CHCHD2	51142	0.841	No	14004	0.632	No	316643	0.847	No
DDT	1652	0.823	No	13202	0.817	No	29318	0.676	No
AURKAIP1	54998	0.737	No	66077	0.806	No	N/A	N/A	N/A
MRPL27	51264	0.759	No	94064	0.681	No	287635	0.867	No
MRPL20	55052	0.63	No	66448	0.805	No	680747	0.869	No
NDUFV3	4731	0.672	Yes	78330	0.862	Yes	64539	0.768	Yes
PSMB3	5691	0.766	No	N/A	N/A	N/A	N/A	N/A	N/A
TMEM256	254863	0.758	No	69186	0.747	No	287442	0.788	No
NDUFAF8	284184	0.657	No	208501	0.764	No	690871	0.867	No
MRPL21	219927	0.891	No	353242	0.704	No	309140	0.691	No
MDH1	4190	0.861	No	17449	0.797	No	24551	0.624	No
MINOS1	440574	0.561	No	433771	0.864	No	362641	0.835	No
SDHC	6391	0.718	Yes	66052	0.744	No	289217	0.797	No
MRPL40	64976	0.842	No	18100	0.754	No	287962	0.657	No
SLIRP	81892	0.962	No	380773	0.85	No	688717	0.436	No
MRPL54	116541	0.809	No	66047	0.648	No	299628	0.778	No
SMIM26	388789	0.79	No	228715	0.849	No	296207	0.593	No
TOMM5	401505	0.814	No	68512	0.872	No	680080	0.544	No
SLC25A5	292	0.782	No	11740	0.71	No	25176	0.738	No
HIGD2A	192286	0.793	No	67044	0.695	No	290999	0.739	No
SDHD	6392	0.548	Yes	66925	0.847	No	363061	0.832	No
TIMM10	26519	0.733	No	30059	0.786	No	64464	0.707	No
APOO	79135	0.788	No	68316	0.723	No	363474	0.71	No
PET100	100131801	0.87	No	100503890	0.738	No	688786	0.612	No
MRPL11	65003	0.756	No	66419	0.787	No	293666	0.676	No
IDH3B	3420	0.674	No	170718	0.707	No	94173	0.832	No
NDUFC2-KCTD14	100532726	0.392	No	68197	0.925	Yes	293130	0.892	Yes
NME1-NME2	654364	0.775	No	18103	0.702	No	83782	0.73	No
RPL17-C18orf32	100526842	0.735	No	N/A	N/A	N/A	N/A	N/A	N/A
PHB	5245	0.714	No	18673	0.756	No	N/A	N/A	N/A
MRPL36	64979	0.843	No	94066	0.731	No	364656	0.621	No
BLOC1S1	2647	0.685	No	14533	0.761	No	288785	0.745	No
NME2	4831	0.758	No	18103	0.702	No	83782	0.73	No
SEM1	7979	0.729	No	N/A	N/A	N/A	N/A	N/A	N/A
MRPL14	64928	0.775	No	68463	0.789	No	301250	0.613	No
MT-CYB	4519	0.779	Yes	17711	0.628	Yes	26192	0.768	Yes
EDF1	8721	0.673	No	59022	0.747	No	296570	0.754	No
MRPL58	3396	0.831	No	68572	0.644	No	303673	0.68	No
COA3	28958	0.75	No	52469	0.767	No	498000	0.637	No
CLPP	8192	0.679	No	53895	0.757	No	N/A	N/A	N/A
PTPMT1	114971	0.669	No	N/A	N/A	N/A	29390	0.767	No
MRPS15	64960	0.858	No	66407	0.657	No	298517	0.638	No
NDUFA10	4705	0.537	Yes	67273	0.863	Yes	316632	0.75	Yes
CHCHD10	400916	0.679	No	103172	0.735	No	361824	0.734	No
MRPS23	51649	0.728	No	64656	0.598	No	360594	0.82	No
CMC2	56942	0.73	No	66531	0.653	No	100363376	0.757	No
TBCA	6902	0.762	No	21371	0.628	No	366995	0.749	No
NAXE	128240	0.733	No	246703	0.68	No	295229	0.722	No
POLR2L	5441	0.78	No	66491	0.641	No	N/A	N/A	N/A
SNRPC	6631	0.71	No	N/A	N/A	N/A	N/A	N/A	N/A
MT-ND3	4537	0.515	Yes	17718	0.846	Yes	26199	0.769	Yes
COPS9	150678	0.514	No	66915	0.829	No	681389	0.786	No
MT-ATP8	4509	0.704	No	17706	0.71	No	N/A	N/A	N/A
DBI	1622	0.795	No	13167	0.669	No	25045	0.655	No
NEDD8	4738	0.816	No	18002	0.673	No	25490	0.625	No
MRPL12	6182	0.715	No	56282	0.805	No	303746	0.592	No
MRPS11	64963	0.735	No	67994	0.652	No	499185	0.723	No
ATP5A1	498	0.693	No	11946	0.712	No	N/A	N/A	N/A
MRPL33	9553	0.801	No	66845	0.609	No	100363539	0.696	No
PDHB	5162	0.71	No	68263	0.722	No	289950	0.673	No
MCEE	84693	0.525	No	73724	0.864	No	293829	0.713	No
MRPL16	54948	0.702	No	94063	0.719	No	293754	0.677	No
LAMTOR5	10542	0.781	No	68576	0.667	No	295357	0.649	No
NDUFAF1	51103	0.747	Yes	69702	0.784	Yes	296086	0.561	Yes
MRPL46	26589	0.768	No	67308	0.791	No	293054	0.532	No
MPC1	51660	0.614	No	55951	0.768	No	171087	0.707	No
EMC4	51234	0.757	No	68032	0.746	No	296049	0.575	No
MRPL42	28977	0.451	No	67270	0.869	No	299743	0.758	No
ATP5L2	267020	0.273	No	27425	0.922	No	300677	0.883	No
COX17	10063	0.767	No	12856	0.732	No	89786	0.576	No
MT-ND1	4535	0.768	Yes	17716	0.485	Yes	26193	0.821	Yes
MRPL18	29074	0.592	No	67681	0.756	No	292244	0.722	No
PRDX5	25824	0.709	No	54683	0.715	No	113898	0.645	No
NDUFAF3	25915	0.634	Yes	66706	0.804	Yes	56769	0.629	Yes
GRPEL1	80273	0.485	No	17713	0.81	No	79563	0.77	No
C21orf33	8209	0.598	No	28295	0.714	No	294326	0.748	No
SS18L2	51188	0.525	No	26901	0.79	No	687029	0.745	No
ECSIT	51295	0.563	Yes	26940	0.732	Yes	300447	0.762	Yes
PSMB6	5694	0.869	No	19175	0.63	No	29666	0.555	No
FH	2271	0.669	No	14194	0.772	No	24368	0.612	No
DNAJC15	29103	0.307	No	66148	0.918	No	290370	0.828	No
COMMD1	150684	0.747	No	17846	0.845	No	289831	0.458	No
UXT	8409	0.752	No	22294	0.689	No	299313	0.608	No
ATP5B	506	0.73	No	11947	0.68	No	171374	0.638	No
LAMTOR4	389541	0.6	No	66096	0.759	No	360776	0.689	No
MALSU1	115416	0.685	No	75593	0.721	No	297082	0.639	No
LAGE3	8270	0.584	No	66192	0.678	No	293863	0.783	No
ZNHIT1	10467	0.736	No	70103	0.59	No	100360077	0.716	No
DPM3	54344	0.722	No	68563	0.666	No	502017	0.653	No
ATP5G2	517	0.575	No	67942	0.678	No	171082	0.786	No
ECHS1	1892	0.699	No	93747	0.684	No	140547	0.653	No
MRPS35	60488	0.593	No	232536	0.797	No	297727	0.643	No
C12orf57	113246	0.552	No	14790	0.715	No	100362005	0.766	No
MRPL28	10573	0.434	No	68611	0.76	No	497876	0.839	No
TIMM23	100287932	0.637	No	53600	0.684	No	54312	0.71	No
DPY30	84661	0.687	No	66310	0.743	No	286897	0.596	No
MRPS7	51081	0.813	No	50529	0.637	No	113958	0.575	No
TOMM6	100188893	0.7	No	66119	0.567	No	681123	0.756	No
MRPL35	51318	0.666	No	66223	0.554	No	297334	0.803	No
SOD1	6647	0.787	No	20655	0.44	No	24786	0.791	No
GLRX5	51218	0.533	No	73046	0.76	No	362776	0.722	No
RPL35	11224	0.669	No	N/A	N/A	N/A	N/A	N/A	N/A
UQCC3	790955	0.64	No	107197	0.641	No	690344	0.726	No
ISCA2	122961	0.587	No	74316	0.751	No	N/A	N/A	N/A
MRPL30	51263	0.449	No	107734	0.768	No	301352	0.789	No
MCRIP2	84331	0.595	No	68241	0.725	No	685545	0.684	No
IDH3G	3421	0.342	No	15929	0.81	No	25179	0.851	No
ALKBH7	84266	0.66	No	66400	0.665	No	679944	0.676	No
ECI1	1632	0.734	No	13177	0.779	No	29740	0.485	No
MRPL48	51642	0.674	No	52443	0.604	No	293149	0.719	No
MGST3	4259	0.653	No	66447	0.638	No	289197	0.701	No
MRPS18C	51023	0.586	No	68735	0.863	No	289469	0.542	No
ACAT1	38	0.599	No	110446	0.72	No	25014	0.671	No
MRPL23	6150	0.706	No	19935	0.775	No	64360	0.508	No
EMC6	83460	0.789	No	66048	0.594	No	287477	0.605	No
DNAJC19	131118	0.662	No	N/A	N/A	N/A	N/A	N/A	N/A
SMDT1	91689	0.439	No	69029	0.885	No	N/A	N/A	N/A
MRPS17	51373	0.729	No	66258	0.574	No	288621	0.682	No
MRPL51	51258	0.867	No	66493	0.643	No	297601	0.474	No
ATOX1	475	0.778	No	11927	0.574	No	84355	0.631	No
GPX4	2879	0.527	No	625249	0.723	No	29328	0.732	No
COPS6	10980	0.681	No	26893	0.669	No	304343	0.631	No
TIMM13	26517	0.547	No	30055	0.723	No	252928	0.706	No
TMEM147	10430	0.768	No	69804	0.782	No	292792	0.422	No
MIEN1	84299	0.552	No	103742	0.685	No	360617	0.735	No
MRPS18A	55168	0.622	No	68565	0.673	No	301249	0.675	No
PDCD5	9141	0.569	No	56330	0.744	No	N/A	N/A	N/A
TMEM14B	81853	0.641	No	66154	0.725	No	171432	0.599	No
POLR2I	5438	0.846	No	69920	0.775	No	292778	0.343	No
TMEM14C	51522	0.636	No	66154	0.725	No	171432	0.599	No
CHCHD3	54927	0.538	No	66075	0.705	No	296966	0.716	No
DCTPP1	79077	0.642	No	66422	0.795	No	192252	0.514	No
MRPL55	128308	0.531	No	67212	0.806	No	287356	0.613	No
RBX1	9978	0.752	No	56438	0.681	No	300084	0.515	No
ANAPC13	25847	0.348	No	69010	0.866	No	685029	0.721	No
MRPL15	29088	0.747	No	27395	0.548	No	297799	0.639	No
SAMM50	25813	0.592	No	68653	0.619	No	300111	0.72	No
MRPS12	6183	0.675	No	24030	0.589	No	292758	0.665	No
SRP14	6727	0.718	No	20813	0.593	No	296076	0.61	No
MRPS14	63931	0.579	No	64659	0.612	No	289143	0.73	No
POMP	51371	0.695	No	66537	0.605	No	288455	0.62	No
ATP6V1F	9296	0.669	No	66144	0.695	No	116664	0.555	No
PSMB4	5692	0.732	No	19172	0.545	No	N/A	N/A	N/A
FIS1	51024	0.683	No	66437	0.541	No	288584	0.686	No
TXN2	25828	0.601	No	56551	0.681	No	79462	0.627	No
EIF3I	8668	0.609	No	54709	0.663	No	N/A	N/A	N/A
COA6	388753	0.706	No	67892	0.566	No	N/A	N/A	N/A
TRAPPC2L	51693	0.661	No	59005	0.64	No	292074	0.605	No
PSMB1	5689	0.646	No	19170	0.687	No	94198	0.573	No
LINC00116	205251	0.635	No	N/A	N/A	N/A	N/A	N/A	N/A
MRPL2	51069	0.424	No	27398	0.752	No	301240	0.729	No
POLR2K	5440	0.642	No	17749	0.61	No	100361574	0.649	No
COX16	51241	0.755	Yes	66272	0.504	No	100302447	0.641	No
IMMP1L	196294	0.488	No	66541	0.78	No	691145	0.632	No
MT-ND2	4536	0.39	Yes	17717	0.723	Yes	26194	0.786	Yes
TMEM205	374882	0.586	No	235043	0.619	No	300441	0.689	No
MRPS34	65993	0.649	No	79044	0.66	No	287126	0.581	No
DCTN3	11258	0.659	No	53598	0.597	No	362504	0.63	No
TMA7	51372	0.772	No	66167	0.597	No	679747	0.516	No
MRPL41	64975	0.6	No	107733	0.621	No	296551	0.66	No
ENDOG	2021	0.611	No	13804	0.632	No	362100	0.637	No
NDUFS1	4719	0.533	Yes	227197	0.712	Yes	301458	0.634	Yes
MRPL24	79590	0.809	No	67707	0.648	No	295224	0.419	No
UROD	7389	0.483	No	22275	0.753	No	29421	0.64	No
TMEM126B	55863	0.599	Yes	68472	0.56	Yes	293114	0.716	Yes
PPA2	27068	0.515	No	74776	0.778	No	310856	0.582	No
CYCS	54205	0.624	Yes	N/A	N/A	N/A	N/A	N/A	N/A
RPL36	25873	0.591	No	54217	0.656	No	N/A	N/A	N/A
C19orf53	28974	0.744	No	101966	0.705	No	288913	0.42	No
EIF3K	27335	0.9	No	73830	0.603	No	292762	0.361	No
PHB2	11331	0.612	No	12034	0.643	No	114766	0.609	No
SURF1	6834	0.657	Yes	20930	0.6	No	64463	0.606	No
POP5	51367	0.626	No	117109	0.673	No	117241	0.556	No
FAM96A	84191	0.69	No	68250	0.546	No	300797	0.618	No
NDUFAF5	79133	0.538	Yes	69487	0.834	Yes	296190	0.478	Yes
HSBP1	3281	0.578	No	68196	0.615	No	286899	0.656	No
C15orf61	145853	0.591	No	69478	0.534	No	363074	0.72	No
NDUFAF6	137682	0.481	Yes	76947	0.749	Yes	N/A	N/A	N/A
STOML2	30968	0.727	No	66592	0.588	No	298203	0.528	No
POLR2J	5439	0.364	No	20022	0.732	No	288588	0.747	No
COPS5	10987	0.669	No	26754	0.559	No	N/A	N/A	N/A
MTCH2	23788	0.628	No	56428	0.559	No	295922	0.646	No
PYURF	100996939	0.491	No	66459	0.742	No	502782	0.597	No
COQ3	51805	0.58	No	230027	0.545	No	29309	0.703	No
ISCU	23479	0.429	No	66383	0.649	No	288740	0.75	No
CISD3	284106	0.489	No	217149	0.76	No	287661	0.578	No
TXNDC17	84817	0.771	No	52700	0.372	No	287474	0.683	No
CMC1	152100	0.665	No	67899	0.649	No	363162	0.512	No
FUOM	282969	0.334	No	69064	0.779	No	293587	0.713	No
GCSH	2653	0.504	No	68133	0.551	No	171133	0.769	No
ECH1	1891	0.533	No	51798	0.714	No	64526	0.576	No
AK6	102157402	0.606	No	N/A	N/A	N/A	N/A	N/A	N/A
SLC25A3	5250	0.592	No	18674	0.511	No	245959	0.711	No
MEA1	4201	0.617	No	17256	0.581	No	685131	0.614	No
EEF1B2	1933	0.604	No	N/A	N/A	N/A	N/A	N/A	N/A
PSMA7	5688	0.661	No	26444	0.645	No	29674	0.502	No
TIMMDC1	51300	0.636	Yes	76916	0.494	Yes	303922	0.677	Yes
MRPL47	57129	0.658	No	74600	0.661	No	294963	0.485	No
SEC61G	23480	0.713	No	20335	0.594	No	689134	0.497	No
TMEM258	746	0.774	No	69038	0.426	No	N/A	N/A	N/A
FAM96B	51647	0.751	No	68523	0.625	No	680987	0.424	No
SNF8	11267	0.528	No	27681	0.61	No	287645	0.661	No
SNRNP25	79622	0.798	No	78372	0.547	No	287170	0.453	No
UFC1	51506	0.651	No	66155	0.705	No	445268	0.442	No
FAU	2197	0.7	No	14109	0.498	No	N/A	N/A	N/A
SERF2	10169	0.681	No	378702	0.517	No	N/A	N/A	N/A
SAR1B	51128	0.487	No	66397	0.685	No	287276	0.624	No
RPL24	6152	0.673	No	68193	0.576	No	64307	0.546	No
RPL27	6155	0.668	No	19942	0.526	No	N/A	N/A	N/A
URGCP-MRPS24	100534592	0.597	No	N/A	N/A	N/A	N/A	N/A	N/A
PRDX3	10935	0.415	No	11757	0.743	No	64371	0.632	No
CWC15	51503	0.621	No	66070	0.511	No	300361	0.651	No
PSMB7	5695	0.675	No	19177	0.688	No	85492	0.419	No
NFU1	27247	0.704	No	56748	0.65	No	297416	0.427	No
MRPS22	56945	0.76	No	64655	0.685	No	683519	0.335	No
PSMA2	5683	0.619	No	19166	0.597	No	29669	0.555	No
CHMP2A	27243	0.627	No	68953	0.625	No	365191	0.518	No
RPS21	6227	0.693	No	66481	0.486	No	N/A	N/A	N/A
COMMD3	23412	0.569	No	12238	0.54	No	291339	0.659	No
CUTA	51596	0.639	No	67675	0.547	No	294288	0.58	No
MRPL39	54148	0.486	No	27393	0.691	No	N/A	N/A	N/A
SYNJ2BP-COX16	100529257	0.705	No	105940408	0.47	No	N/A	N/A	N/A
MRPL32	64983	0.622	No	75398	0.673	No	291206	0.466	No
UBA52	7311	0.53	No	22186	0.66	No	64156	0.571	No
TMEM208	29100	0.638	No	66320	0.6	No	291963	0.521	No
PFDN1	5201	0.558	No	67199	0.622	No	361310	0.579	No
SPCS1	28972	0.705	No	69019	0.467	No	N/A	N/A	N/A
VDAC3	7419	0.598	No	22335	0.654	No	83532	0.506	No
ACO2	50	0.453	No	11429	0.673	No	79250	0.631	No
C6orf226	441150	0.469	No	67101	0.702	No	N/A	N/A	N/A
PIGP	51227	0.535	No	56176	0.509	No	288238	0.712	No
SDHAF4	135154	0.469	No	68002	0.716	No	685888	0.571	No
TIMM17A	10440	0.523	No	21854	0.679	No	54311	0.553	No
OST4	100128731	0.748	No	67695	0.521	No	100188932	0.483	No
C1QBP	708	0.77	No	12261	0.606	No	29681	0.373	No
MRPL43	84545	0.602	No	94067	0.694	No	309440	0.453	No
MT-CO2	4513	0.486	Yes	17709	0.556	No	26198	0.707	No
PFDN5	5204	0.665	No	56612	0.452	No	300257	0.631	No
SF3B5	83443	0.813	No	66125	0.552	No	680891	0.38	No
TUFM	7284	0.623	No	233870	0.57	No	293481	0.546	No
SMIM20	389203	0.54	No	66278	0.619	No	N/A	N/A	N/A
MIF	4282	0.616	No	17319	0.518	No	81683	0.604	No
NME1	4830	0.792	No	18102	0.523	No	191575	0.42	No
RPL36AL	6166	0.647	No	66483	0.509	No	N/A	N/A	N/A
PCBD2	84105	0.196	No	72562	0.733	No	685729	0.805	No
LSM7	51690	0.706	No	66094	0.576	No	362829	0.451	No
TMEM160	54958	0.576	No	69094	0.514	No	292654	0.639	No
AIFM1	9131	0.575	No	26926	0.543	No	83533	0.611	No
PTRHD1	391356	0.801	No	69709	0.576	No	298861	0.349	No
RTRAF	51637	0.643	No	68045	0.452	No	302247	0.628	No
DDTL	100037417	0.229	No	13202	0.817	No	29318	0.676	No
LSM4	25804	0.681	No	50783	0.613	No	290647	0.427	No
PXMP2	5827	0.593	No	19301	0.536	No	29533	0.591	No
PSMG1	8624	0.468	No	56088	0.596	No	288236	0.655	No
NIT2	56954	0.614	No	52633	0.549	No	288174	0.554	No
ENY2	56943	0.585	No	N/A	N/A	N/A	685258	0.558	No
MRPL4	51073	0.489	No	66163	0.558	No	363023	0.664	No
NCBP2-AS2	152217	0.57	No	N/A	N/A	N/A	N/A	N/A	N/A
TPI1	7167	0.542	No	21991	0.574	No	24849	0.594	No
ATRAID	51374	0.703	No	381629	0.454	No	298841	0.552	No
RPS7	6201	0.655	No	20115	0.484	No	N/A	N/A	N/A
WDR83OS	51398	0.664	No	414077	0.437	No	288925	0.606	No
PSMA1	5682	0.568	No	N/A	N/A	N/A	N/A	N/A	N/A
HAGH	3029	0.417	No	14651	0.681	No	24439	0.604	No
GSTK1	373156	0.524	No	76263	0.637	No	297029	0.54	No
ETFDH	2110	0.42	Yes	66841	0.547	Yes	295143	0.732	Yes
UBL5	59286	0.893	No	100042786	0.337	No	500954	0.468	No
RPA3	6119	0.756	No	68240	0.551	No	296883	0.391	No
VDAC2	7417	0.546	No	22334	0.571	No	83531	0.579	No
MRPL45	84311	0.498	No	67036	0.593	No	287656	0.601	No
MRPS9	64965	0.541	No	69527	0.499	No	301371	0.646	No
PSMA6	5687	0.733	No	26443	0.517	No	29673	0.434	No
SLC25A11	8402	0.515	No	67863	0.65	No	64201	0.519	No
RPS29	6235	0.561	No	N/A	N/A	N/A	N/A	N/A	N/A
C20orf24	55969	0.561	No	N/A	N/A	N/A	N/A	N/A	N/A
DECR1	1666	0.606	No	67460	0.484	No	117543	0.592	No
VPS25	84313	0.648	No	28084	0.473	No	N/A	N/A	N/A
DAD1	1603	0.729	No	13135	0.428	No	192275	0.522	No
PSMB5	5693	0.673	No	19173	0.688	No	29425	0.317	No
CENPX	201254	0.57	No	20892	0.548	No	N/A	N/A	N/A
SSR4	6748	0.648	No	20832	0.49	No	29435	0.538	No
HAX1	10456	0.645	No	23897	0.472	No	N/A	N/A	N/A
CHURC1	91612	0.211	No	211151	0.729	No	299154	0.735	No
TOMM22	56993	0.652	No	223696	0.498	No	300075	0.524	No
PARL	55486	0.51	No	381038	0.605	No	N/A	N/A	N/A
RPS19BP1	91582	0.638	No	66538	0.476	No	N/A	N/A	N/A
POLR2F	5435	0.672	No	69833	0.658	No	83503	0.338	No
OXLD1	339229	0.412	No	66431	0.7	No	N/A	N/A	N/A
COX7A2L	9167	0.756	Yes	20463	0.564	No	298762	0.345	No
NUDT2	318	0.528	No	66401	0.631	No	297998	0.505	No
C11orf71	54494	0.293	No	434402	0.729	No	500993	0.641	No
SMIM4	440957	0.52	No	66487	0.587	No	N/A	N/A	N/A
SNRPE	6635	0.552	No	N/A	N/A	N/A	N/A	N/A	N/A
NHP2	55651	0.853	No	52530	0.601	No	287273	0.201	No
PRDX2	7001	0.545	No	21672	0.568	No	29338	0.541	No
HINT1	3094	0.85	No	15254	0.783	No	690660	0.02	No
PEBP1	5037	0.466	No	23980	0.532	No	29542	0.655	No
MRPL50	54534	0.453	No	28028	0.538	No	362517	0.661	No
PRDX1	5052	0.589	No	18477	0.489	No	117254	0.571	No
AAMDC	28971	0.514	No	66273	0.744	No	361606	0.391	No
LSM3	27258	0.82	No	67678	0.567	No	297455	0.261	No
DMAC1	90871	0.481	No	66928	0.61	No	298147	0.556	No
PMPCB	9512	0.419	No	73078	0.771	No	64198	0.457	No
FKBP3	2287	0.534	No	30795	0.595	No	299104	0.515	No
RPS17	6218	0.575	No	20068	0.519	No	N/A	N/A	N/A
RPL34	6164	0.606	No	68436	0.588	No	362041	0.445	No
DYNLRB1	83658	0.398	No	67068	0.611	No	170714	0.63	No
RNF7	9616	0.542	No	19823	0.542	No	300948	0.554	No
DGCR6	8214	0.43	No	13353	0.589	No	303794	0.619	No
DLD	1738	0.471	No	13382	0.592	No	298942	0.575	No
LBHD1	79081	0.672	No	102308570	0.419	No	N/A	N/A	N/A
COMMD6	170622	0.521	No	66200	0.64	No	498559	0.475	No
MRPL3	11222	0.557	No	94062	0.513	No	300974	0.565	No
ESD	2098	0.531	No	13885	0.482	No	290401	0.622	No
HDDC3	374659	0.63	No	68695	0.33	No	308758	0.674	No
PFDN6	10471	0.465	No	14976	0.645	No	309629	0.524	No
COQ9	57017	0.524	No	67914	0.666	No	498909	0.443	No
SMIM11B	102723553	0.502	No	68936	0.68	No	100174909	0.45	No
EMC7	56851	0.675	No	73024	0.372	No	296050	0.584	No
NDUFAF4	29078	0.728	Yes	68493	0.657	Yes	362495	0.243	Yes
MRPL1	65008	0.553	No	94061	0.532	No	N/A	N/A	N/A
GLO1	2739	0.427	No	109801	0.446	No	294320	0.754	No
MCTS1	28985	0.513	No	66405	0.448	No	302500	0.665	No
TIMM21	29090	0.497	No	67105	0.565	No	307210	0.564	No
GTF2H5	404672	0.556	No	66467	0.527	No	N/A	N/A	N/A
ELOC	6921	0.716	No	67923	0.367	No	N/A	N/A	N/A
CNPY2	10330	0.697	No	56530	0.43	No	685814	0.497	No
RPP21	79897	0.51	No	67676	0.601	No	406230	0.513	No
GHITM	27069	0.662	No	66092	0.484	No	290596	0.477	No
VPS29	51699	0.52	No	56433	0.546	No	288666	0.557	No
HIGD1A	25994	0.547	No	56295	0.646	No	140937	0.429	No
ANAPC11	51529	0.78	No	66156	0.373	No	498030	0.468	No
REX1BD	55049	0.356	No	66462	0.727	No	306348	0.538	No
C6orf203	51250	0.397	No	67851	0.7	No	683897	0.522	No
ACAA2	10449	0.356	No	52538	0.681	No	170465	0.58	No
NAA20	51126	0.627	No	67877	0.537	No	362228	0.452	No
SF3B6	51639	0.593	No	66055	0.483	No	N/A	N/A	N/A
FAM173A	65990	0.499	No	214917	0.524	No	287150	0.588	No
QDPR	5860	0.442	No	110391	0.629	No	64192	0.54	No
BOLA2B	552900	0.634	No	66162	0.537	No	502367	0.437	No
SWI5	375757	0.468	No	72931	0.703	No	499779	0.437	No
DHRS4	10901	0.449	No	28200	0.581	No	266686	0.577	No
MRPS25	64432	0.366	No	64658	0.494	No	297459	0.747	No
MKKS	8195	0.631	No	59030	0.533	No	311456	0.442	No
POLDIP2	26073	0.478	No	67811	0.592	No	N/A	N/A	N/A
TMEM141	85014	0.67	No	51875	0.427	No	499755	0.503	No
GRHPR	9380	0.585	No	76238	0.395	No	680021	0.617	No
SDHAF3	57001	0.435	No	71238	0.522	No	362323	0.639	No
C12orf73	728568	0.363	No	544717	0.607	No	691921	0.625	No
SMIM27	100129250	0.53	No	100504309	0.533	No	N/A	N/A	N/A
APIP	51074	0.359	No	56369	0.735	No	295961	0.497	No
TMEM242	729515	0.164	No	70544	0.654	No	292228	0.773	No
LAMTOR1	55004	0.518	No	66508	0.515	No	308869	0.556	No
POLR2G	5436	0.706	No	67710	0.527	No	117017	0.356	No
AP2S1	1175	0.611	No	232910	0.449	No	65046	0.527	No
GSTO1	9446	0.633	No	14873	0.444	No	114846	0.507	No
C16orf91	283951	0.515	No	214489	0.543	No	497874	0.525	No
SPAG7	9552	0.579	No	216873	0.486	No	303260	0.518	No
RPL26	6154	0.497	No	19941	0.526	No	287417	0.557	No
ISOC2	79763	0.602	No	664994	0.329	No	684270	0.649	No
MRPL57	78988	0.556	No	67840	0.497	No	N/A	N/A	N/A
COQ7	10229	0.27	No	12850	0.783	No	N/A	N/A	N/A
HADHB	3032	0.484	No	231086	0.546	No	171155	0.549	No
STX8	9482	0.558	No	55943	0.513	No	59074	0.506	No
SDHA	6389	0.477	Yes	66945	0.45	No	157074	0.65	No
BOLA1	51027	0.385	No	69168	0.584	No	365875	0.608	No
TIMM50	92609	0.349	No	66525	0.642	No	687295	0.583	No
HDDC2	51020	0.544	No	69692	0.509	No	361462	0.517	No
RPL38	6169	0.412	No	67671	0.531	No	682793	0.627	No
POP7	10248	0.666	No	74097	0.473	No	288564	0.43	No
RPL23A	6147	0.459	No	268449	0.587	No	N/A	N/A	N/A
WDR61	80349	0.64	No	66317	0.493	No	363064	0.433	No
RPS26	6231	0.539	No	27370	0.504	No	N/A	N/A	N/A
MRPL37	51253	0.676	No	56280	0.514	No	56281	0.374	No
TMX2	51075	0.546	No	66958	0.496	No	N/A	N/A	N/A
MT-CO3	4514	0.358	Yes	17710	0.684	No	N/A	N/A	N/A
COQ5	84274	0.609	No	52064	0.531	No	304542	0.421	No
PSMA4	5685	0.638	No	26441	0.573	No	29671	0.346	No
TRIAP1	51499	0.587	No	69076	0.346	No	691278	0.623	No
RPL29	6159	0.585	No	19944	0.414	No	29283	0.557	No
CYB5A	1528	0.48	No	109672	0.459	No	64001	0.616	No
ETFRF1	144363	0.425	No	67636	0.482	No	100361188	0.646	No
MRPL44	65080	0.342	No	69163	0.585	No	301552	0.623	No
FKBP2	2286	0.458	No	14227	0.504	No	293702	0.587	No
PRADC1	84279	0.65	No	73327	0.429	No	686393	0.469	No
RPL17	6139	0.516	No	N/A	N/A	N/A	N/A	N/A	N/A
VPS28	51160	0.387	No	N/A	N/A	N/A	300052	0.643	No
HIKESHI	51501	0.642	No	67669	0.502	No	293103	0.399	No
PSENEN	55851	0.375	No	66340	0.523	No	292788	0.645	No
RPS15	6209	0.514	No	N/A	N/A	N/A	N/A	N/A	N/A
DHRS4L2	317749	0.382	No	28200	0.581	No	266686	0.577	No
MMADHC	27249	0.464	No	109129	0.563	No	362134	0.512	No
ZNHIT3	9326	0.657	No	448850	0.542	No	497975	0.338	No
GLRX2	51022	0.608	No	69367	0.412	No	114022	0.517	No
SAP18	10284	0.38	No	100041953	0.594	No	290284	0.563	No
MYDGF	56005	0.449	No	28106	0.406	No	501282	0.681	No
SCAND1	51282	0.491	No	19018	0.421	No	362252	0.622	No
SMIM8	57150	0.225	No	66291	0.624	No	297971	0.685	No
BUD31	8896	0.494	No	231889	0.562	No	89819	0.472	No
VDAC1	7416	0.382	No	22333	0.571	No	83529	0.573	No
MOCS2	4338	0.379	No	17434	0.491	No	294753	0.655	No
DNPH1	10591	0.687	No	381101	0.276	No	171047	0.561	No
RPS13	6207	0.586	No	68052	0.43	No	N/A	N/A	N/A
THOC7	80145	0.635	No	66231	0.524	No	305714	0.364	No
POLE4	56655	0.684	No	66979	0.331	No	N/A	N/A	N/A
RPL19	6143	0.458	No	19921	0.557	No	N/A	N/A	N/A
TRAPPC1	58485	0.272	No	245828	0.583	No	287427	0.665	No
TRAP1	10131	0.469	Yes	68015	0.475	No	287069	0.575	No
MSRB2	22921	0.387	No	76467	0.566	No	361286	0.566	No
FAM162A	26355	0.659	No	70186	0.685	No	360721	0.174	No
PIN1	5300	0.586	No	23988	0.411	No	298696	0.52	No
PDHA1	5160	0.568	No	18597	0.513	No	29554	0.434	No
C1orf122	127687	0.564	No	68920	0.522	No	362592	0.429	No
UCHL3	7347	0.617	No	50933	0.663	No	498560	0.234	No
PSMD8	5714	0.745	No	57296	0.466	No	292766	0.301	No
AKR7A2	8574	0.52	No	110198	0.413	No	171445	0.579	No
RNASEH2C	84153	0.328	No	68209	0.622	No	100361939	0.56	No
SKP1	6500	0.512	No	21402	0.461	No	287280	0.536	No
CETN2	1069	0.448	No	26370	0.461	No	84593	0.599	No
MRPS30	10884	0.384	No	59054	0.531	No	294767	0.592	No
RPS27A	6233	0.47	No	78294	0.534	No	N/A	N/A	N/A
FDX1	2230	0.358	No	14148	0.53	No	29189	0.617	No
SLC25A4	291	0.469	No	11739	0.55	No	85333	0.485	No
GNG5	2787	0.511	No	14707	0.491	No	N/A	N/A	N/A
SNRNP27	11017	0.331	No	66618	0.67	No	N/A	N/A	N/A
MT-ND4L	4539	0.653	No	17720	0.346	No	N/A	N/A	N/A
PCCB	5096	0.634	No	66904	0.417	No	24624	0.447	No
WASHC3	51019	0.557	No	67282	0.38	No	299707	0.56	No
SNU13	4809	0.542	No	20826	0.456	No	N/A	N/A	N/A
RPS10	6204	0.515	No	67097	0.482	No	N/A	N/A	N/A
C8orf59	401466	0.526	No	69126	0.448	No	499567	0.521	No
PPIAL4A	653505	0.498	No	N/A	N/A	N/A	N/A	N/A	N/A
COPS4	51138	0.6	No	26891	0.406	No	360915	0.487	No
METTL5	29081	0.576	No	75422	0.545	No	502632	0.372	No
COQ6	51004	0.335	No	217707	0.655	No	299195	0.502	No
TIMM8A	1678	0.287	No	30058	0.707	No	84383	0.498	No
EMC9	51016	0.434	No	85308	0.586	No	290224	0.471	No
H2AFZ	3015	0.629	No	51788	0.363	No	N/A	N/A	N/A
GADD45GIP1	90480	0.508	No	102060	0.435	No	288916	0.545	No
NSMCE1	197370	0.575	No	67711	0.377	No	361645	0.535	No
MRPS18B	28973	0.573	No	66973	0.47	No	294230	0.442	No
PSMA3	5684	0.548	No	19167	0.48	No	29670	0.457	No
PTS	5805	0.498	No	19286	0.55	No	29498	0.436	No
SEC61B	10952	0.572	No	66212	0.507	No	298068	0.404	No
TMEM70	54968	0.358	No	70397	0.63	No	N/A	N/A	N/A
HIGD2B	123346	0.048	No	67044	0.695	No	290999	0.739	No
TRAPPC4	51399	0.599	No	60409	0.484	No	367073	0.397	No
SMIM11A	54065	0.349	No	68936	0.68	No	100174909	0.45	No
CHCHD7	79145	0.31	No	66433	0.661	No	684258	0.508	No
PSMC5	5705	0.477	No	19184	0.418	No	81827	0.583	No
FXN	2395	0.26	No	14297	0.508	No	499335	0.71	No
TSFM	10102	0.45	No	66399	0.491	No	679068	0.536	No
PPA1	5464	0.529	No	67895	0.534	No	294504	0.412	No
SUCLA2	8803	0.359	No	20916	0.601	No	361071	0.515	No
HADH	3033	0.507	No	15107	0.59	No	113965	0.377	No
CLYBL	171425	0.286	No	69634	0.712	No	306198	0.474	No
DHRS7B	25979	0.384	No	216820	0.56	No	287380	0.525	No
MTFP1	51537	0.38	No	67900	0.618	No	289745	0.468	No
TGIF2-C20orf24	100527943	0.551	No	67388	0.521	No	296315	0.393	No
MTX2	10651	0.506	No	53375	0.556	No	288150	0.403	No
ZSWIM7	125150	0.305	No	69747	0.67	No	287388	0.489	No
MRPL52	122704	0.52	No	68836	0.581	No	361037	0.362	No
MRPL17	63875	0.627	No	27397	0.459	No	171061	0.376	No
MACROD1	28992	0.208	No	107227	0.628	No	246233	0.626	No
RPS25	6230	0.518	No	75617	0.456	No	N/A	N/A	N/A
RPS5	6193	0.575	No	20103	0.455	No	25538	0.43	No
TIMM23B	100652748	0.064	No	53600	0.684	No	54312	0.71	No
ATP6V1E1	529	0.484	No	11973	0.413	No	297566	0.56	No
OAZ1	4946	0.381	No	18245	0.493	No	25502	0.583	No
MORN2	729967	0.449	No	378462	0.522	No	N/A	N/A	N/A
GTF2A2	2958	0.687	No	235459	0.414	No	83828	0.353	No
SMIM19	114926	0.577	No	102032	0.371	No	100362321	0.504	No
RPL32	6161	0.416	No	19951	0.552	No	N/A	N/A	N/A
SRA1	10011	0.447	No	N/A	N/A	N/A	252891	0.52	No
SNRPD3	6634	0.527	No	67332	0.457	No	687711	0.466	No
SSBP1	6742	0.565	No	381760	0.33	No	54304	0.55	No
HIBADH	11112	0.33	No	58875	0.545	No	63938	0.57	No
BCKDHB	594	0.219	No	12040	0.521	No	29711	0.705	No
ECI2	10455	0.42	No	23986	0.467	No	291075	0.557	No
RPL39	6170	0.481	No	N/A	N/A	N/A	N/A	N/A	N/A
NTPCR	84284	0.538	No	66566	0.194	No	361443	0.71	No
CDC123	8872	0.364	No	98828	0.481	No	116656	0.597	No
SNRPF	6636	0.752	No	69878	0.478	No	680737	0.211	No
NUDT14	256281	0.276	No	66174	0.555	No	299346	0.61	No
NTAN1	123803	0.261	No	18203	0.552	No	360462	0.628	No
PSMA5	5686	0.633	No	26442	0.475	No	29672	0.33	No
DGCR6L	85359	0.224	No	13353	0.589	No	303794	0.619	No
ACADVL	37	0.156	No	11370	0.627	No	25363	0.649	No
C11orf74	119710	0.406	No	68170	0.528	No	295952	0.496	No
RPL35A	6165	0.476	No	N/A	N/A	N/A	N/A	N/A	N/A
CEBPZOS	100505876	0.112	No	68554	0.84	No	N/A	N/A	N/A
MTX1	4580	0.479	No	17827	0.535	No	295241	0.412	No
RPL8	6132	0.529	No	26961	0.419	No	N/A	N/A	N/A
RPL36A	6173	0.415	No	19982	0.532	No	N/A	N/A	N/A
FARS2	10667	0.368	No	69955	0.527	No	306879	0.525	No
ALG14	199857	0.533	No	66789	0.459	No	362031	0.427	No
ERH	2079	0.621	No	N/A	N/A	N/A	681415	0.325	No
RPL9	6133	0.473	No	N/A	N/A	N/A	N/A	N/A	N/A
SSNA1	8636	0.511	No	68475	0.421	No	311802	0.485	No
RPS14	6208	0.4	No	20044	0.451	No	29284	0.564	No
ETHE1	23474	0.378	No	66071	0.576	No	292710	0.461	No
GOT1	2805	0.507	No	14718	0.434	No	24401	0.473	No
GATB	5188	0.502	No	229487	0.54	No	361974	0.371	No
IAH1	285148	0.455	No	67732	0.431	No	298917	0.527	No
AUH	549	0.302	No	11992	0.452	No	361215	0.659	No
RPS9	6203	0.508	No	76846	0.433	No	N/A	N/A	N/A
APOPT1	84334	0.183	No	68020	0.545	No	299341	0.683	No
COMMD4	54939	0.463	No	66199	0.515	No	363068	0.432	No
ARL6IP4	51329	0.523	No	65105	0.41	No	288656	0.477	No
IDH3A	3419	0.328	No	67834	0.543	No	114096	0.537	No
TALDO1	6888	0.342	No	21351	0.605	No	83688	0.461	No
MRPS10	55173	0.395	No	64657	0.543	No	N/A	N/A	N/A
PGK1	5230	0.3	No	18655	0.581	No	24644	0.526	No
C1orf53	388722	0.477	No	69549	0.54	No	360851	0.389	No
GCHFR	2644	0.443	No	320415	0.482	No	171128	0.481	No
TXN	7295	0.624	No	22166	0.357	No	116484	0.424	No
RPL23	9349	0.468	No	N/A	N/A	N/A	N/A	N/A	N/A
PIN4	5303	0.371	No	69713	0.605	No	684441	0.428	No
ACOT8	10005	0.461	No	170789	0.394	No	170588	0.547	No
UBAC1	10422	0.384	No	98766	0.552	No	362087	0.466	No
MRPL49	740	0.302	No	18120	0.598	No	309176	0.501	No
MECR	51102	0.361	No	26922	0.528	No	29470	0.511	No
RPL12	6136	0.466	No	N/A	N/A	N/A	N/A	N/A	N/A
SDHAF1	644096	0.383	No	68332	0.474	No	499125	0.54	No
CCNQ	92002	0.45	No	69109	0.385	No	303321	0.561	No
VAMP8	8673	0.497	No	22320	0.442	No	83730	0.457	No
RPL31	6160	0.465	No	N/A	N/A	N/A	N/A	N/A	N/A
SDHAF2	54949	0.461	No	66072	0.47	No	361726	0.464	No
EXOSC5	56915	0.454	No	27998	0.428	No	308441	0.513	No
IMMP2L	83943	0.188	No	93757	0.742	No	N/A	N/A	N/A
PRELID1	27166	0.656	No	66494	0.341	No	290995	0.393	No
BABAM1	29086	0.499	No	68251	0.481	No	290631	0.41	No
PDF	64146	0.348	No	68023	0.489	No	690214	0.552	No
BCCIP	56647	0.449	No	66165	0.477	No	N/A	N/A	N/A
PEX7	5191	0.354	No	18634	0.424	No	308718	0.61	No
PSMG3	84262	0.413	No	66506	0.422	No	100361517	0.552	No
MAIP1	79568	0.663	No	68115	0.515	No	301418	0.208	No
RANGRF	29098	0.379	No	57785	0.57	No	287419	0.437	No
MIPEP	4285	0.32	No	70478	0.604	No	N/A	N/A	N/A
EBP	10682	0.531	No	13595	0.435	No	117278	0.419	No
LYRM4	57128	0.467	No	380840	0.425	No	102550385	0.492	No
PSMB2	5690	0.424	No	26445	0.479	No	29675	0.479	No
RPL30	6156	0.552	No	19946	0.369	No	N/A	N/A	N/A
RPLP0	6175	0.46	No	N/A	N/A	N/A	N/A	N/A	N/A
EEF1AKMT1	221143	0.401	No	68043	0.557	No	290279	0.422	No
DCXR	51181	0.553	No	67880	0.401	No	171408	0.423	No
YIF1A	10897	0.459	No	68090	0.459	No	N/A	N/A	N/A
USE1	55850	0.456	No	67023	0.496	No	290627	0.424	No
EXOSC4	54512	0.482	No	109075	0.393	No	300045	0.498	No
PSMD6	9861	0.425	No	66413	0.505	No	289924	0.443	No
NME3	4832	0.283	No	79059	0.516	No	85269	0.574	No
MTIF3	219402	0.419	No	76366	0.496	No	N/A	N/A	N/A
IDH2	3418	0.356	No	269951	0.48	No	361596	0.536	No
COPE	11316	0.352	No	59042	0.506	No	290659	0.513	No
C9orf16	79095	0.264	No	73737	0.544	No	499780	0.563	No
TMCO1	54499	0.447	No	68944	0.467	No	289196	0.456	No
HSCB	150274	0.349	No	100900	0.447	No	360826	0.574	No
MT-ND5	4540	0.532	Yes	17721	0.381	Yes	N/A	N/A	N/A
PDHX	8050	0.366	No	27402	0.519	No	311254	0.483	No
MSRB1	51734	0.26	No	27361	0.325	No	685059	0.782	No
NDUFAF7	55471	0.148	Yes	73694	0.666	Yes	298748	0.553	Yes
POLR3K	51728	0.606	No	67005	0.248	No	366277	0.511	No
IFI27L2	83982	0.455	No	N/A	N/A	N/A	N/A	N/A	N/A
MYCBP	26292	0.363	No	56309	0.545	No	100361133	0.456	No
DNAJC4	3338	0.154	No	57431	0.596	No	361717	0.614	No
TIMM17B	10245	0.509	No	N/A	N/A	N/A	317374	0.4	No
ACADM	34	0.348	No	11364	0.465	No	24158	0.55	No
FAHD1	81889	0.374	No	68636	0.588	No	302980	0.4	No
POLR1D	51082	0.322	No	20018	0.586	No	N/A	N/A	N/A
MRPS31	10240	0.294	No	57312	0.583	No	290850	0.485	No
RIDA	10247	0.476	No	15473	0.483	No	65151	0.402	No
RPL41	6171	0.543	No	67945	0.376	No	124440	0.441	No
MDP1	145553	0.608	No	67881	0.309	No	290230	0.443	No
TMEM11	8834	0.429	No	216821	0.536	No	303196	0.394	No
MTG1	92170	0.113	No	212508	0.583	No	100910751	0.663	No
MED11	400569	0.404	No	66172	0.389	No	287456	0.565	No
PPIA	5478	0.451	No	N/A	N/A	N/A	N/A	N/A	N/A
IMP3	55272	0.449	No	102462	0.464	No	315697	0.44	No
COX7A1	1346	0.228	No	12865	0.8	No	687508	0.325	No
CCDC58	131076	0.396	No	381045	0.542	No	288065	0.413	No
RNASEK	440400	0.345	No	52898	0.34	No	287453	0.666	No
PHYH	5264	0.398	No	16922	0.483	No	114209	0.469	No
TRAPPC6A	79090	0.41	No	67091	0.431	No	680465	0.508	No
PNKD	25953	0.274	No	56695	0.465	No	100188944	0.61	No
NAA10	8260	0.463	No	56292	0.652	No	363518	0.233	No
GUK1	2987	0.352	No	14923	0.555	No	303179	0.44	No
RPS18	6222	0.469	No	20084	0.429	No	N/A	N/A	N/A
GFM1	85476	0.206	No	28030	0.509	No	114017	0.631	No
GON7	84520	0.489	No	100233175	0.326	No	100233176	0.53	No
RPS24	6229	0.448	No	N/A	N/A	N/A	N/A	N/A	N/A
PAM16	51025	0.448	No	N/A	N/A	N/A	N/A	N/A	N/A
MRPL9	65005	0.513	No	78523	0.493	No	310653	0.337	No
RPS11	6205	0.357	No	27207	0.534	No	81774	0.451	No
DDRGK1	65992	0.357	No	77006	0.447	No	296162	0.538	No
RPS20	6224	0.447	No	N/A	N/A	N/A	N/A	N/A	N/A
LSM10	84967	0.618	No	116748	0.344	No	366468	0.378	No
APOOL	139322	0.238	No	68117	0.525	No	317191	0.577	No
TIMM9	26520	0.435	No	30056	0.438	No	171139	0.466	No
TRAPPC2B	10597	0.392	No	66050	0.66	No	501550	0.286	No
ISCA1	81689	0.33	No	69046	0.502	No	290985	0.506	No
UQCC1	55245	0.24	No	56046	0.52	No	683512	0.577	No
SARNP	84324	0.478	No	66118	0.366	No	362819	0.492	No
CHCHD6	84303	0.446	No	66098	0.539	No	297436	0.35	No
MYL6	4637	0.436	No	17904	0.454	No	N/A	N/A	N/A
TRMT112	51504	0.61	No	67674	0.245	No	293700	0.479	No
PSME2	5721	0.454	No	19188	0.488	No	29614	0.391	No
SRP9	6726	0.388	No	27058	0.383	No	690345	0.561	No
RPL22	6146	0.32	No	N/A	N/A	N/A	81768	0.568	No
PFDN4	5203	0.369	No	109054	0.429	No	100366237	0.533	No
GPX1	2876	0.351	No	14775	0.389	No	24404	0.591	No
ATP6V1G1	9550	0.434	No	66290	0.463	No	298103	0.433	No
RPP25L	138716	0.576	No	69961	0.408	No	298002	0.346	No
CHCHD4	131474	0.568	No	72170	0.525	No	312559	0.236	No
RPL10A	4736	0.417	No	19896	0.439	No	81729	0.473	No
C18orf32	497661	0.309	No	407819	0.591	No	498886	0.429	No
HIBCH	26275	0.324	No	227095	0.563	No	301384	0.441	No
THYN1	29087	0.491	No	77862	0.49	No	300470	0.346	No
ZMAT5	55954	0.397	No	67178	0.422	No	501926	0.507	No
PTGES2	80142	0.341	No	96979	0.601	No	311865	0.384	No
ORMDL2	29095	0.526	No	66844	0.299	No	288783	0.499	No
METTL26	84326	0.416	No	68347	0.548	No	302998	0.36	No
BCAP31	10134	0.353	No	27061	0.445	No	293852	0.526	No
CPT2	1376	0.354	No	12896	0.501	No	25413	0.468	No
ACYP2	98	0.451	No	75572	0.527	No	364224	0.344	No
RPS27L	6232	0.289	No	67941	0.767	No	681429	0.266	No
STMP1	647087	0.306	No	N/A	N/A	N/A	689574	0.575	No
ACADS	35	0.236	No	11409	0.532	No	64304	0.553	No
PCBD1	5092	0.563	No	13180	0.321	No	29700	0.437	No
LCMT1	51451	0.476	No	30949	0.436	No	361643	0.409	No
PFDN2	5202	0.519	No	18637	0.42	No	685607	0.379	No
PGLS	25796	0.323	No	66171	0.594	No	290636	0.4	No
SSU72	29101	0.358	No	68991	0.466	No	298681	0.491	No
CGRRF1	10668	0.23	No	68755	0.581	No	116679	0.503	No
IMMT	10989	0.442	No	76614	0.491	No	312444	0.379	No
RNF181	51255	0.751	No	66510	0.169	No	297337	0.391	No
LSM5	23658	0.612	No	66373	0.478	No	306222	0.22	No
HSD17B8	7923	0.432	No	14979	0.555	No	361802	0.322	No
DLAT	1737	0.369	No	235339	0.502	No	N/A	N/A	N/A
SLC25A6	293	0.435	No	N/A	N/A	N/A	N/A	N/A	N/A
GAPDH	2597	0.435	No	N/A	N/A	N/A	N/A	N/A	N/A
PRDX4	10549	0.585	No	53381	0.257	No	85274	0.461	No
RPL13A	23521	0.457	No	22121	0.476	No	317646	0.37	No
RPL22L1	200916	0.369	No	68028	0.48	No	361923	0.454	No
SDF2	6388	0.346	No	20316	0.365	No	287470	0.591	No
COMMD9	29099	0.538	No	76501	0.403	No	295956	0.36	No
CCDC12	151903	0.387	No	72654	0.365	No	363151	0.548	No
TST	7263	0.34	No	22117	0.457	No	25274	0.503	No
SLC25A20	788	0.262	No	57279	0.39	No	117035	0.648	No
PMVK	10654	0.57	No	68603	0.367	No	310645	0.363	No
RPL15	6138	0.331	No	N/A	N/A	N/A	245981	0.535	No
MAGOH	4116	0.45	No	17149	0.571	No	298385	0.278	No
C11orf98	102288414	0.401	No	66276	0.511	No	690349	0.387	No
TOMM20	9804	0.341	No	67952	0.432	No	266601	0.526	No
FLAD1	80308	0.337	No	319945	0.398	No	751787	0.564	No
SUPT4H1	6827	0.492	No	20922	0.486	No	287608	0.319	No
GABARAPL2	11345	0.359	No	93739	0.405	No	64670	0.533	No
JTB	10899	0.535	No	23922	0.531	No	29439	0.229	No
RPL6	6128	0.509	No	19988	0.424	No	117042	0.362	No
AKR1A1	10327	0.497	No	58810	0.338	No	78959	0.459	No
FAHD2A	51011	0.337	No	68126	0.529	No	296131	0.426	No
SNAPIN	23557	0.525	No	20615	0.172	No	295217	0.595	No
RPS16	6217	0.492	No	20055	0.444	No	140655	0.356	No
GLRX3	10539	0.407	No	30926	0.568	No	58815	0.317	No
HINT3	135114	0.127	No	66847	0.698	No	246769	0.467	No
LIAS	11019	0.246	No	79464	0.46	No	305348	0.585	No
PGAM1	5223	0.43	No	N/A	N/A	N/A	N/A	N/A	N/A
NUDT6	11162	0.384	No	229228	0.362	No	207120	0.544	No
LDHB	3945	0.441	No	16832	0.521	No	24534	0.327	No
ADSL	158	0.549	No	11564	0.399	No	315150	0.34	No
IFT20	90410	0.342	No	55978	0.405	No	287541	0.541	No
OXNAD1	92106	0.288	No	218885	0.514	No	306270	0.486	No
PPIH	10465	0.564	No	66101	0.455	No	366461	0.268	No
KRTCAP2	200185	0.449	No	66059	0.359	No	295243	0.479	No
TRIM39-RPP21	202658	0.429	No	N/A	N/A	N/A	N/A	N/A	N/A
FAHD2B	151313	0.332	No	68126	0.529	No	296131	0.426	No
TSTD3	100130890	0.323	No	77032	0.494	No	500420	0.47	No
PSMC3	5702	0.509	No	19182	0.481	No	29677	0.296	No
CRIPT	9419	0.285	No	56724	0.459	No	56725	0.539	No
COPS3	8533	0.495	No	26572	0.488	No	287367	0.3	No
PSMG4	389362	0.199	No	69666	0.479	No	689623	0.605	No
COA4	51287	0.647	No	68185	0.267	No	499214	0.368	No
NUDT22	84304	0.387	No	68323	0.331	No	293703	0.562	No
SELENOK	58515	0.415	No	80795	0.365	No	290549	0.499	No
TMEM60	85025	0.387	No	212090	0.518	No	296761	0.374	No
ATP6V0E1	8992	0.489	No	11974	0.345	No	94170	0.443	No
UBL4A	8266	0.178	No	27643	0.6	No	293864	0.499	No
RPS28	6234	0.361	No	54127	0.49	No	N/A	N/A	N/A
BCKDHA	593	0.343	No	12039	0.565	No	25244	0.368	No
NUBPL	80224	0.134	Yes	76826	0.623	Yes	299008	0.519	Yes
NUDT19	390916	0.095	No	110959	0.645	No	308518	0.536	No
C6orf136	221545	0.226	No	69662	0.512	No	294231	0.535	No
RPS3	6188	0.398	No	27050	0.449	No	N/A	N/A	N/A
ATPIF1	93974	0.696	No	11983	0.371	No	25392	0.203	No
PCCA	5095	0.222	No	110821	0.538	No	687008	0.509	No
RPL13	6137	0.349	No	270106	0.428	No	81765	0.492	No
AKR7A3	22977	0.276	No	110198	0.413	No	171445	0.579	No
ZCRB1	85437	0.477	No	67197	0.489	No	362990	0.301	No
MRPS26	64949	0.452	No	99045	0.522	No	362216	0.293	No
EMG1	10436	0.588	No	14791	0.544	No	312706	0.134	No
PPCS	79717	0.415	No	106564	0.432	No	298490	0.419	No
SMIM12	113444	0.25	No	80284	0.519	No	685634	0.495	No
GPI	2821	0.432	No	14751	0.325	No	292804	0.505	No
HMBS	3145	0.394	No	15288	0.409	No	25709	0.459	No
COQ10A	93058	0.236	Yes	210582	0.509	Yes	362810	0.516	Yes
TIMM10B	26515	0.196	No	14356	0.528	No	84384	0.537	No
SUB1	10923	0.52	No	20024	0.236	No	192269	0.504	No
MRPL19	9801	0.322	No	56284	0.421	No	297372	0.515	No
RABAC1	10567	0.384	No	14470	0.45	No	83583	0.423	No
ANAPC15	25906	0.644	No	75430	0.336	No	293155	0.276	No
ZNF32	7580	0.372	No	232337	0.421	No	362425	0.462	No
POLR2H	5437	0.457	No	245841	0.379	No	N/A	N/A	N/A
RPS3A	6189	0.398	No	20091	0.426	No	29288	0.43	No
ACADL	33	0	No	11363	0.51	No	25287	0.743	No
CCDC124	115098	0.247	No	234388	0.461	No	290642	0.543	No
RPS19	6223	0.417	No	N/A	N/A	N/A	N/A	N/A	N/A
PEX19	5824	0.332	No	19298	0.298	No	289233	0.621	No
GSTZ1	2954	0.434	No	14874	0.465	No	681913	0.351	No
ATP6V1D	51382	0.385	No	73834	0.466	No	299159	0.399	No
ACYP1	97	0.221	No	66204	0.559	No	299203	0.469	No
BRK1	55845	0.543	No	101314	0.37	No	679934	0.335	No
ZBTB8OS	339487	0.61	No	67106	0.284	No	297885	0.354	No
PDZD11	51248	0.472	No	72621	0.374	No	302422	0.401	No
ADK	132	0.384	No	11534	0.354	No	25368	0.509	No
AIMP2	7965	0.63	No	231872	0.392	No	288480	0.224	No
CCDC51	79714	0.461	No	66658	0.378	No	316008	0.406	No
NOL7	51406	0.459	No	70078	0.371	No	N/A	N/A	N/A
TMEM218	219854	0.213	No	66279	0.471	No	300516	0.561	No
CMBL	134147	0.153	No	69574	0.538	No	310201	0.554	No
METTL23	124512	0.415	No	N/A	N/A	N/A	N/A	N/A	N/A
UBE2A	7319	0.238	No	22209	0.541	No	298317	0.464	No
TM2D2	83877	0.185	No	69742	0.46	No	290833	0.597	No
DYNLL2	140735	0.311	No	68097	0.36	No	140734	0.569	No
RPL37A	6168	0.324	No	19981	0.502	No	N/A	N/A	N/A
PRICKLE4	29964	0.699	No	381104	0.127	No	N/A	N/A	N/A
NSA2	10412	0.546	No	59050	0.297	No	171456	0.395	No
RPS15A	6210	0.484	No	267019	0.244	No	117053	0.51	No
TECR	9524	0.296	No	106529	0.43	No	191576	0.511	No
SEC11C	90701	0.453	No	66286	0.34	No	266758	0.441	No
PHF5A	84844	0.404	No	68479	0.423	No	192246	0.406	No
RMDN1	51115	0.342	No	66302	0.48	No	N/A	N/A	N/A
C11orf1	64776	0.458	No	68721	0.363	No	N/A	N/A	N/A
RPL7A	6130	0.401	No	N/A	N/A	N/A	296596	0.419	No
STUB1	10273	0.443	No	56424	0.346	No	287155	0.44	No
CCS	9973	0.11	No	12460	0.537	No	84485	0.582	No
SIVA1	10572	0.521	No	30954	0.459	No	362791	0.248	No
MCCC1	56922	0.292	No	72039	0.382	No	294972	0.554	No
COX20	116228	0.305	Yes	66359	0.686	No	289278	0.236	No
BPHL	670	0.231	No	68021	0.464	No	361239	0.531	No
APRT	353	0.653	No	11821	0.322	No	292072	0.249	No
TBCB	1155	0.415	No	66411	0.406	No	292777	0.401	No
CHMP4A	29082	0.407	No	N/A	N/A	N/A	N/A	N/A	N/A
CENPS-CORT	100526739	0.407	No	N/A	N/A	N/A	N/A	N/A	N/A
DGUOK	1716	0.499	No	27369	0.258	No	297389	0.463	No
COX11	1353	0.475	Yes	69802	0.412	No	690300	0.333	No
H2AFV	94239	0.209	No	77605	0.49	No	498894	0.521	No
SLC35B1	10237	0.499	No	110172	0.314	No	N/A	N/A	N/A
GCDH	2639	0.339	No	270076	0.469	No	364975	0.411	No
FDX2	112812	0.406	No	N/A	N/A	N/A	N/A	N/A	N/A
CUEDC2	79004	0.564	No	67116	0.384	No	294009	0.27	No
YARS2	51067	0.344	No	70120	0.586	No	287924	0.288	No
CHCHD5	84269	0.576	No	66170	0.358	No	296147	0.283	No
GABARAP	11337	0.3	No	56486	0.368	No	58974	0.547	No
IGBP1	3476	0.383	No	18518	0.364	No	58845	0.466	No
CNIH1	10175	0.404	No	12793	0.443	No	289994	0.365	No
IFI27L1	122509	0.404	No	N/A	N/A	N/A	N/A	N/A	N/A
MRPS5	64969	0.389	No	77721	0.502	No	296134	0.321	No
MPDU1	9526	0.355	No	24070	0.311	No	303244	0.546	No
TRAPPC5	126003	0.702	No	66682	0.334	No	363858	0.176	No
DYNLL1	8655	0.565	No	56455	0.225	No	58945	0.422	No
SNAPC5	10302	0.464	No	330959	0.392	No	691501	0.355	No
RPSA	3921	0.447	No	16785	0.328	No	29236	0.436	No
TRAPPC3	27095	0.506	No	27096	0.295	No	362599	0.409	No
ZNRD1	30834	0.442	No	66136	0.443	No	361784	0.324	No
JAGN1	84522	0.415	No	67767	0.457	No	502872	0.336	No
RPL11	6135	0.477	No	67025	0.328	No	N/A	N/A	N/A
SPRYD4	283377	0.356	No	66701	0.423	No	288772	0.428	No
MCCC2	64087	0.195	No	78038	0.426	No	361884	0.586	No
ACP1	52	0.443	No	11431	0.361	No	24161	0.402	No
PSMC2	5701	0.469	No	19181	0.373	No	25581	0.364	No
POP4	10775	0.616	No	66161	0.25	No	292831	0.338	No
ATP6V0B	533	0.449	No	114143	0.352	No	N/A	N/A	N/A
TXNL4A	10907	0.484	No	27366	0.23	No	100911462	0.487	No
SIRT3	23410	0.001	No	64384	0.585	No	293615	0.615	No
ACY1	95	0.415	No	109652	0.331	No	300981	0.454	No
PDCD2	5134	0.412	No	18567	0.458	No	58934	0.33	No
SELENOH	280636	0.464	No	72657	0.389	No	502642	0.346	No
CBR4	84869	0.079	No	234309	0.667	No	359725	0.453	No
DNAJC8	22826	0.399	No	N/A	N/A	N/A	N/A	N/A	N/A
RPL18A	6142	0.356	No	76808	0.475	No	290641	0.365	No
SUCLG2	8801	0.348	No	20917	0.307	No	362404	0.541	No
AK2	204	0.414	No	11637	0.402	No	24184	0.379	No
CSNK2B	1460	0.321	No	13001	0.411	No	81650	0.463	No
LSM1	27257	0.647	No	67207	0.416	No	364624	0.131	No
TAF10	6881	0.404	No	24075	0.457	No	293345	0.333	No
SRPRB	58477	0.398	No	N/A	N/A	N/A	N/A	N/A	N/A
COPRS	55352	0.478	No	66423	0.367	No	290925	0.349	No
PSMD4	5710	0.474	No	19185	0.356	No	83499	0.362	No
CCDC107	203260	0.217	No	622404	0.578	No	313496	0.397	No
BNIP1	662	0.463	No	224630	0.337	No	140932	0.39	No
DAP3	7818	0.407	No	65111	0.536	No	295238	0.247	No
YIF1B	90522	0.205	No	77254	0.588	No	N/A	N/A	N/A
TEX264	51368	0.43	No	21767	0.354	No	300988	0.405	No
NQO2	4835	0.296	No	18105	0.396	No	291084	0.497	No
BAG1	573	0.295	No	12017	0.597	No	297994	0.297	No
NFS1	9054	0.258	No	18041	0.475	No	84594	0.456	No
EMC8	10328	0.432	No	18117	0.305	No	361425	0.451	No
ASNA1	439	0.385	No	56495	0.435	No	288919	0.368	No
LACTB2	51110	0.308	No	212442	0.305	No	297768	0.575	No
ACTR10	55860	0.316	No	56444	0.429	No	299121	0.441	No
TMBIM4	51643	0.258	No	68212	0.484	No	362884	0.444	No
SDR39U1	56948	0.217	No	654795	0.489	No	361044	0.479	No
UFSP2	55325	0.336	No	192169	0.403	No	361151	0.443	No
MPV17L2	84769	0.331	No	234384	0.457	No	N/A	N/A	N/A
PAIP2	51247	0.286	No	67869	0.404	No	361309	0.492	No
MSRA	4482	0.194	No	110265	0.516	No	29447	0.472	No
C2orf76	130355	0.435	No	73103	0.281	No	288978	0.464	No
PSMD13	5719	0.396	No	23997	0.38	No	365388	0.404	No
ARPC5L	81873	0.336	No	74192	0.459	No	296710	0.385	No
ACAD9	28976	0.371	Yes	229211	0.352	Yes	294973	0.457	Yes
SLC25A26	115286	0.396	No	67582	0.39	No	N/A	N/A	N/A
CCT7	10574	0.57	No	12468	0.331	No	297406	0.277	No
ATP5S	27109	0.416	No	68055	0.358	No	362749	0.404	No
OXA1L	5018	0.356	No	69089	0.217	No	691393	0.604	No
CRLS1	54675	0.413	No	66586	0.445	No	366196	0.318	No
RAN	5901	0.531	No	19384	0.331	No	84509	0.313	No
FCF1	51077	0.055	No	73736	0.627	No	299198	0.493	No
TUSC2	11334	0.454	No	80385	0.394	No	501052	0.322	No
RNASEH2A	10535	0.352	No	69724	0.353	No	364974	0.465	No
NUDT1	4521	0.459	No	17766	0.506	No	117260	0.204	No
BORCS8	729991	0.244	No	72368	0.452	No	688966	0.473	No
BLVRB	645	0.426	No	233016	0.35	No	292737	0.391	No
HIST1H4J	8363	0.389	No	N/A	N/A	N/A	N/A	N/A	N/A
ACAA1	30	0.361	No	113868	0.318	No	24157	0.487	No
BTF3	689	0.448	No	218490	0.329	No	N/A	N/A	N/A
CMSS1	84319	0.459	No	66497	0.532	No	288176	0.174	No
COQ2	27235	0.366	No	71883	0.48	No	498332	0.319	No
TEN1	100134934	0.403	No	69535	0.379	No	360664	0.382	No
POLR2E	5434	0.361	No	66420	0.407	No	690966	0.396	No
PPIB	5479	0.341	No	19035	0.343	No	64367	0.48	No
TTC1	7265	0.536	No	66827	0.317	No	287208	0.31	No
NACA	4666	0.334	No	17938	0.463	No	288770	0.366	No
EEF1E1	9521	0.532	No	66143	0.431	No	291057	0.199	No
S100A13	6284	0.222	No	20196	0.559	No	295213	0.381	No
DNAJA3	9093	0.314	No	83945	0.404	No	360481	0.443	No
RBKS	64080	0.308	No	71336	0.39	No	362706	0.462	No
RPLP1	6176	0.386	No	N/A	N/A	N/A	N/A	N/A	N/A
DUSP28	285193	0.34	No	67446	0.432	No	N/A	N/A	N/A
PLA2G16	11145	0.205	No	225845	0.376	No	24913	0.577	No
PDCD2L	84306	0.374	No	68079	0.463	No	689637	0.32	No
SPA17	53340	0.317	No	20686	0.328	No	85244	0.512	No
DERA	51071	0.387	No	232449	0.322	No	690945	0.446	No
MRPS6	64968	0.319	No	121022	0.451	No	N/A	N/A	N/A
DNLZ	728489	0.309	No	52838	0.502	No	296587	0.343	No
MED31	51003	0.228	No	67279	0.5	No	287475	0.426	No
HACD1	9200	0.128	No	30963	0.548	No	680115	0.478	No
IER3IP1	51124	0.355	No	66191	0.414	No	N/A	N/A	N/A
FAM213B	127281	-0.01	No	66469	0.465	No	362676	0.698	No
ELOF1	84337	0.29	No	66126	0.559	No	691193	0.303	No
EMC2	9694	0.231	No	66736	0.537	No	N/A	N/A	N/A
C17orf49	124944	0.395	No	104457	0.352	No	287452	0.403	No
PSMD14	10213	0.592	No	59029	0.407	No	311078	0.15	No
TMEM223	79064	0.383	No	N/A	N/A	N/A	N/A	N/A	N/A
ARL2	402	0.335	No	56327	0.428	No	65142	0.386	No
CHRAC1	54108	0.002	No	93696	0.497	No	315058	0.648	No
METTL22	79091	0.114	No	239706	0.567	No	287054	0.465	No
MFSD3	113655	0.337	No	69572	0.338	No	500899	0.47	No
RPL18	6141	0.318	No	19899	0.418	No	81766	0.409	No
HCFC1R1	54985	0.238	No	353502	0.525	No	N/A	N/A	N/A
RPLP2	6181	0.282	No	67186	0.397	No	100911575	0.465	No
CMC4	100272147	0.517	No	105886298	0.245	No	N/A	N/A	N/A
AARSD1	80755	0.351	No	69684	0.557	No	619440	0.235	No
EIF1B	10289	0.215	No	68969	0.394	No	301068	0.532	No
PIGF	5281	0.455	No	18701	0.305	No	N/A	N/A	N/A
CIB1	10519	0.412	No	23991	0.441	No	81823	0.287	No
C1orf123	54987	0.384	No	74098	0.337	No	298384	0.418	No
SRP19	6728	0.381	No	66384	0.484	No	291685	0.274	No
SCNM1	79005	0.45	No	69269	0.355	No	310662	0.333	No
CS	1431	0.294	No	12974	0.434	No	170587	0.41	No
WBP1	23559	0.198	No	22377	0.469	No	297381	0.471	No
CKS2	1164	0.477	No	66197	0.281	No	N/A	N/A	N/A
SEC13	6396	0.443	No	110379	0.386	No	297522	0.308	No
DHPS	1725	0.399	No	330817	0.378	No	288923	0.36	No
C21orf59	56683	0.237	No	68001	0.397	No	288269	0.501	No
TTC32	130502	0.097	No	75516	0.558	No	684830	0.478	No
MZT2A	653784	0.378	No	72083	0.619	No	287929	0.136	No
RBFA	79863	0.18	No	68731	0.332	No	307235	0.62	No
PSMC1	5700	0.452	No	19179	0.402	No	117263	0.276	No
LYRM2	57226	0.318	No	108755	0.399	No	690354	0.413	No
TPT1	7178	0.254	No	22070	0.432	No	116646	0.444	No
U2AF1L4	199746	0.112	No	233073	0.493	No	361542	0.525	No
TMEM203	94107	0.369	No	227615	0.299	No	311800	0.461	No
NOP16	51491	0.559	No	28126	0.298	No	306768	0.271	No
UROS	7390	0.454	No	22276	0.305	No	309070	0.369	No
SSSCA1	10534	0.53	No	56390	0.415	No	689397	0.181	No
OSTC	58505	0.405	No	66357	0.268	No	362040	0.453	No
HMGCL	3155	0.331	No	15356	0.392	No	79238	0.403	No
UGP2	7360	0.228	No	216558	0.381	No	289827	0.517	No
ALAD	210	0.107	No	17025	0.342	No	25374	0.677	No
NPRL2	10641	0.225	No	56032	0.437	No	363138	0.463	No
EIF3H	8667	0.435	No	68135	0.314	No	N/A	N/A	N/A
OLA1	29789	0.275	No	67059	0.425	No	296488	0.423	No
RPS23	6228	0.294	No	66475	0.47	No	124323	0.359	No
GSTP1	2950	0.418	No	14870	0.48	No	24426	0.224	No
C12orf10	60314	0.42	No	60315	0.263	No	300258	0.437	No
CCNH	902	0.419	No	66671	0.398	No	84389	0.303	No
ESRRA	2101	0.305	No	26379	0.425	No	293701	0.39	No
MT-ND4	4538	0.343	Yes	17719	0.68	Yes	26201	0.096	Yes
COA5	493753	0.325	No	76178	0.284	No	503252	0.51	No
MED21	9412	0.202	No	108098	0.485	No	312849	0.432	No
HMOX2	3163	0.274	No	15369	0.324	No	79239	0.52	No
ALKBH3	221120	0.341	No	69113	0.285	No	362169	0.491	No
RMND1	55005	0.213	No	66084	0.381	No	292268	0.523	No
PSMC4	5704	0.354	No	23996	0.351	No	117262	0.412	No
NUDT16L1	84309	0.388	No	66911	0.293	No	497867	0.435	No
TPRKB	51002	0.646	No	69786	0.211	No	297411	0.258	No
HSPB11	51668	0.46	No	72938	0.249	No	685284	0.406	No
SCCPDH	51097	0.282	No	109232	0.321	No	305021	0.512	No
AP4S1	11154	0.049	No	11782	0.635	No	366618	0.431	No
TACO1	51204	0.695	Yes	70207	0.38	No	360645	0.039	No
BSG	682	0.168	No	12215	0.401	No	25246	0.543	No
RPS8	6202	0.37	No	N/A	N/A	N/A	N/A	N/A	N/A
EIF3M	10480	0.338	No	98221	0.436	No	295975	0.335	No
MRPL10	124995	0.296	No	107732	0.441	No	691075	0.372	No
SMIM7	79086	0.416	No	66818	0.293	No	688495	0.399	No
HADHA	3030	0.392	No	97212	0.429	No	170670	0.287	No
TEFM	79736	0.196	No	68550	0.542	No	N/A	N/A	N/A
ATPAF1	64756	0.47	No	230649	0.284	No	313510	0.352	No
HRAS	3265	0.225	No	15461	0.452	No	293621	0.428	No
PSTK	118672	0.167	No	214580	0.465	No	361661	0.473	No
FABP5	2171	0.368	No	N/A	N/A	N/A	N/A	N/A	N/A
ATPAF2	91647	0.248	No	246782	0.426	No	303190	0.43	No
NUDT7	283927	0.193	No	67528	0.436	No	361413	0.474	No
DMAC2	55101	0.381	No	66349	0.289	No	361520	0.432	No
C4orf3	401152	0.208	No	67704	0.509	No	691807	0.385	No
CHPT1	56994	0.182	No	212862	0.324	No	362866	0.596	No
ENTPD4	9583	-0.134	No	100862375	0.919	No	361063	0.317	No
PSMD10	5716	0.367	No	N/A	N/A	N/A	N/A	N/A	N/A
BANF1	8815	0.367	No	N/A	N/A	N/A	N/A	N/A	N/A
TAF9	6880	0.55	No	108143	0.288	No	373541	0.262	No
AMZ2	51321	0.35	No	13929	0.338	No	360650	0.412	No
FDPS	2224	0.48	No	110196	0.251	No	N/A	N/A	N/A
CCDC167	154467	0.608	No	68597	0.005	No	689755	0.483	No
STK16	8576	0.245	No	20872	0.328	No	286927	0.523	No
BAD	572	0.376	No	12015	0.302	No	64639	0.417	No
ELP5	23587	0.354	No	54351	0.502	No	287446	0.239	No
HSD17B4	3295	0.251	No	15488	0.362	No	79244	0.482	No
C8orf82	414919	0.174	No	N/A	N/A	N/A	362946	0.556	No
ABHD11	83451	0.17	No	68758	0.515	No	360831	0.41	No
PGM1	5236	0.25	No	72157	0.392	No	24645	0.45	No
TXNRD2	10587	0.087	No	26462	0.452	No	50551	0.553	No
GTF3A	2971	0.462	No	66596	0.321	No	246299	0.308	No
MTERF4	130916	0.063	No	69821	0.394	No	363289	0.634	No
RAB9A	9367	0.259	No	56382	0.362	No	84589	0.47	No
DCTN6	10671	0.488	No	22428	0.25	No	290798	0.352	No
TSTA3	7264	0.247	No	22122	0.413	No	300036	0.43	No
MPST	4357	0.207	No	246221	0.429	No	192172	0.454	No
CLTA	1211	0.446	No	12757	0.253	No	83800	0.389	No
PCMT1	5110	0.419	No	18537	0.306	No	N/A	N/A	N/A
NPM1	4869	0.362	No	N/A	N/A	N/A	N/A	N/A	N/A
SETD9	133383	0.362	No	N/A	N/A	N/A	N/A	N/A	N/A
RPS10-NUDT3	100529239	0.362	No	N/A	N/A	N/A	N/A	N/A	N/A
PTRH2	51651	0.438	No	217057	0.409	No	287593	0.237	No
MGMT	4255	0.385	No	17314	0.336	No	25332	0.363	No
CBR1	873	0.364	No	12408	0.473	No	29224	0.247	No
PLGRKT	55848	0.583	No	67759	0.175	No	293888	0.325	No
ARPC3	10094	0.481	No	56378	0.329	No	288669	0.273	No
ZCCHC17	51538	0.366	No	619605	0.349	No	500555	0.368	No
UBXN1	51035	0.168	No	225896	0.435	No	293719	0.48	No
AHCY	191	0.457	No	11615	0.25	No	29443	0.375	No
MED30	90390	0.199	No	69790	0.416	No	299905	0.467	No
CLNS1A	1207	0.386	No	12729	0.283	No	65160	0.412	No
TMEM9B	56674	0.289	No	56786	0.309	No	293415	0.483	No
DLST	1743	0.192	No	78920	0.327	No	299201	0.562	No
SEC11A	23478	0.509	No	56529	0.269	No	65166	0.302	No
ADI1	55256	0.377	No	104923	0.19	No	298934	0.513	No
VKORC1	79001	0.36	No	N/A	N/A	N/A	N/A	N/A	N/A
HDHD2	84064	0.275	No	76987	0.463	No	361351	0.341	No
HIST1H4C	8364	0.405	No	319158	0.313	No	N/A	N/A	N/A
HYPK	25764	0.1	No	67693	0.374	No	311359	0.602	No
CSTB	1476	0.349	No	13014	0.391	No	25308	0.334	No
PRKAG1	5571	0.454	No	19082	0.261	No	N/A	N/A	N/A
FOXRED1	55572	0.26	No	235169	0.455	No	N/A	N/A	N/A
TMEM251	26175	0.405	No	320351	0.309	No	N/A	N/A	N/A
GPS1	2873	0.258	No	209318	0.352	No	117039	0.461	No
ARL3	403	0.173	No	56350	0.478	No	64664	0.42	No
RNF5	6048	0.299	No	54197	0.33	No	407784	0.441	No
CIAO1	9391	0.128	No	26371	0.42	No	29231	0.522	No
EIF3G	8666	0.461	No	53356	0.351	No	298700	0.257	No
CYSTM1	84418	0.399	No	66060	0.313	No	N/A	N/A	N/A
THAP4	51078	0.358	No	67026	0.306	No	363291	0.404	No
MPND	84954	0.262	No	68047	0.473	No	681944	0.333	No
BLVRA	644	0.343	No	109778	0.35	No	116599	0.374	No
MYL6B	140465	0.534	No	216459	0.177	No	N/A	N/A	N/A
GOT2	2806	0.411	No	14719	0.258	No	25721	0.397	No
HIST1H4K	8362	0.403	No	319157	0.307	No	N/A	N/A	N/A
PPIF	10105	0.264	No	105675	0.385	No	282819	0.416	No
CIAPIN1	57019	0.338	No	109006	0.268	No	307649	0.458	No
BCS1L	617	0.312	No	66821	0.486	No	301514	0.266	No
MFF	56947	0.295	No	75734	0.385	No	301563	0.384	No
CKS1B	1163	0.553	No	54124	0.219	No	499655	0.291	No
PRELID3B	51012	0.225	No	66390	0.483	No	N/A	N/A	N/A
ALAS1	211	0.285	No	11655	0.266	No	65155	0.51	No
GCAT	23464	0.256	No	26912	0.435	No	366959	0.369	No
RPL7	6129	0.353	No	N/A	N/A	N/A	N/A	N/A	N/A
RDH14	57665	0.233	No	105014	0.453	No	500629	0.373	No
TMEM134	80194	0.29	No	N/A	N/A	N/A	361695	0.415	No
ALG5	29880	0.442	No	66248	0.369	No	295051	0.246	No
MTHFS	10588	0.345	No	100039707	0.358	No	300886	0.354	No
RPL27A	6157	0.352	No	N/A	N/A	N/A	N/A	N/A	N/A
PGP	283871	0.262	No	67078	0.416	No	287115	0.378	No
MRM3	55178	0.402	No	67390	0.479	No	360569	0.174	No
CHAC2	494143	0.247	No	68044	0.442	No	360994	0.366	No
SCP2	6342	0.294	No	20280	0.409	No	N/A	N/A	N/A
HSDL2	84263	0.2	No	72479	0.358	No	313200	0.496	No
SMIM30	401397	0.448	No	66520	0.254	No	N/A	N/A	N/A
RPS2	6187	0.351	No	N/A	N/A	N/A	N/A	N/A	N/A
TIMM44	10469	0.287	No	21856	0.485	No	29635	0.28	No
C5orf63	401207	0.129	No	77422	0.423	No	100174910	0.5	No
MARC2	54996	0.134	No	67247	0.448	No	171451	0.468	No
C3orf14	57415	0.238	No	218734	0.172	No	289928	0.639	No
TMEM230	29058	0.386	No	70612	0.27	No	681315	0.392	No
SUMO1	7341	0.354	No	22218	0.367	No	301442	0.327	No
RETSAT	54884	0.116	No	67442	0.438	No	246298	0.494	No
ARF5	381	0.332	No	11844	0.267	No	79117	0.448	No
PSMD9	5715	0.307	No	67151	0.299	No	161475	0.44	No
FABP3	2170	0.088	No	14077	0.457	No	79131	0.501	No
FUNDC2	65991	0.368	No	67391	0.329	No	N/A	N/A	N/A
PECR	55825	0.27	No	111175	0.427	No	N/A	N/A	N/A
DPH3	285381	0.385	No	105638	0.476	No	680594	0.184	No
GEMIN6	79833	0.571	No	67242	0.249	No	362688	0.224	No
DRG1	4733	0.601	No	13494	0.282	No	305470	0.16	No
HSPA9	3313	0.447	No	15526	0.356	No	291671	0.24	No
TMED1	11018	0.375	No	17083	0.374	No	315461	0.294	No
MT-CO1	4512	0.343	Yes	17708	0.248	No	26195	0.451	No
MMACHC	25974	0.258	No	67096	0.417	No	313520	0.367	No
CDC26	246184	0.472	No	66440	0.242	No	366381	0.327	No
MZT2B	80097	0.285	No	72083	0.619	No	287929	0.136	No
CDK5	1020	0.473	No	12568	0.238	No	140908	0.326	No
RPL21	6144	0.378	No	19933	0.313	No	N/A	N/A	N/A
CENPW	387103	0.408	No	66311	0.282	No	N/A	N/A	N/A
TMEM179B	374395	0.309	No	N/A	N/A	N/A	690263	0.381	No
PIGY	84992	0.476	No	66268	0.663	No	100365921	-0.105	No
HPF1	54969	0.362	No	72612	0.296	No	290706	0.376	No
PYCR3	65263	0.058	No	66194	0.459	No	300035	0.516	No
WDR18	57418	0.304	No	216156	0.343	No	314617	0.384	No
MTFR1L	56181	0.284	No	76824	0.358	No	298549	0.388	No
PEPD	5184	0.318	No	18624	0.367	No	N/A	N/A	N/A
SELENOW	6415	0.471	No	20364	0.214	No	N/A	N/A	N/A
MLYCD	23417	0.174	No	56690	0.394	No	85239	0.459	No
GAMT	2593	0.24	No	14431	0.234	No	25257	0.552	No
COASY	80347	0.232	No	71743	0.402	No	287711	0.392	No
GSTM3	2947	0.117	No	14866	0.553	No	64352	0.356	No
APEH	327	0.449	No	235606	0.226	No	24206	0.351	No
PDSS1	23590	0.266	No	56075	0.418	No	N/A	N/A	N/A
AKR7L	246181	0.034	No	110198	0.413	No	171445	0.579	No
SAT2	112483	0.383	No	69215	0.176	No	360547	0.466	No
BORCS7	119032	0.281	No	66439	0.375	No	294012	0.369	No
PPP1CA	5499	0.271	No	19045	0.387	No	24668	0.366	No
GTF3C6	112495	0.546	No	67371	0.346	No	361858	0.131	No
PTGR2	145482	0.057	No	77219	0.521	No	299194	0.443	No
S100A1	6271	0.056	No	20193	0.754	No	295214	0.21	No
KRT10	3858	0.37	No	16661	0.292	No	450225	0.358	No
CD320	51293	0.295	No	54219	0.317	No	362851	0.408	No
ATG10	83734	0.118	No	66795	0.431	No	688555	0.471	No
ST20-MTHFS	100528021	0.306	No	100039707	0.358	No	300886	0.354	No
TM2D1	83941	0.191	No	94043	0.405	No	362545	0.422	No
MVB12A	93343	0.172	No	73711	0.523	No	290635	0.323	No
PNPO	55163	0.342	No	103711	0.217	No	64533	0.457	No
ATP23	91419	0.338	No	68876	0.345	No	299828	0.333	No
EAPP	55837	0.331	No	66266	0.305	No	299043	0.379	No
TSR3	115939	0.309	No	68327	0.322	No	360494	0.384	No
PEX16	9409	0.2	No	18633	0.412	No	311203	0.402	No
RPS6	6194	0.367	No	20104	0.301	No	29304	0.346	No
AIMP1	9255	0.288	No	13722	0.444	No	114632	0.282	No
EBNA1BP2	10969	0.541	No	69072	0.229	No	114021	0.243	No
FAM103A1	83640	0.272	No	67148	0.325	No	293058	0.416	No
UBXN6	80700	0.143	No	66530	0.391	No	363332	0.478	No
TRAPPC2	6399	0.066	No	66050	0.66	No	501550	0.286	No
PSMG2	56984	0.45	No	107047	0.444	No	291539	0.117	No
TKT	7086	0.184	No	21881	0.324	No	64524	0.503	No
BTBD1	53339	0.202	No	83962	0.408	No	293060	0.4	No
TMEM42	131616	0.277	No	66079	0.429	No	363171	0.303	No
GNPTG	84572	0.206	No	214505	0.325	No	287134	0.477	No
AK3	50808	0.204	No	56248	0.226	No	26956	0.577	No
PMPCA	23203	0.273	No	66865	0.398	No	N/A	N/A	N/A
MGST2	4258	0.581	No	211666	0.09	No	N/A	N/A	N/A
DTYMK	1841	0.276	No	21915	0.414	No	301622	0.315	No
LYPLAL1	127018	0.386	No	226791	0.284	No	N/A	N/A	N/A
LDHA	3939	0.29	No	16828	0.339	No	24533	0.375	No
COMMD5	28991	0.205	No	66398	0.397	No	245974	0.401	No
SCO1	6341	0.545	Yes	52892	0.177	No	497930	0.28	No
SNRPB	6628	0.422	No	20638	0.314	No	171365	0.266	No
COMTD1	118881	0.36	No	69156	0.372	No	305685	0.27	No
CENPV	201161	0.2	No	73139	0.468	No	N/A	N/A	N/A
UBB	7314	0.411	No	22187	0.257	No	N/A	N/A	N/A
GNPAT	8443	0.32	No	14712	0.266	No	84470	0.415	No
HAUS1	115106	0.367	No	225745	0.404	No	192228	0.229	No
RWDD1	51389	0.534	No	66521	0.478	No	259218	-0.012	No
DUT	1854	0.402	No	110074	0.3	No	497778	0.298	No
DRAP1	10589	0.329	No	66556	0.451	No	293674	0.218	No
RPS12	6206	0.423	No	20042	0.242	No	N/A	N/A	N/A
MTFMT	123263	0.296	No	69606	0.167	No	315763	0.534	No
ALDOA	226	0.382	No	11674	0.41	No	24189	0.205	No
COX10	1352	0.238	No	70383	0.334	No	691853	0.425	No
GRSF1	2926	0.329	No	231413	0.329	No	305256	0.338	No
SLC25A33	84275	0.303	No	70556	0.304	No	691431	0.389	No
PPP1R35	221908	0.166	No	69871	0.308	No	684993	0.522	No
RRP36	88745	0.379	No	224823	0.285	No	N/A	N/A	N/A
GFER	2671	0.25	No	11692	0.421	No	27100	0.324	No
STARD10	10809	0.18	No	56018	0.371	No	293150	0.444	No
SVIP	258010	0.147	No	75744	0.27	No	499157	0.578	No
TPMT	7172	0.236	No	22017	0.213	No	690050	0.545	No
COPZ1	22818	0.482	No	56447	0.18	No	315345	0.332	No
OXSM	54995	0.458	No	71147	0.149	No	289934	0.386	No
MTHFD1	4522	0.259	No	108156	0.3	No	64300	0.434	No
GPN3	51184	0.421	No	68080	0.29	No	360810	0.281	No
MMAA	166785	0.139	No	109136	0.503	No	291939	0.35	No
MTRF1	9617	0.034	No	211253	0.421	No	686234	0.537	No
NMNAT1	64802	0.195	No	66454	0.483	No	298653	0.313	No
NIPSNAP2	2631	0.353	No	14467	0.385	No	498174	0.252	No
NUTF2	10204	0.325	No	68051	0.323	No	291981	0.342	No
MT-ATP6	4508	0.302	No	17705	0.358	No	N/A	N/A	N/A
CETN3	1070	0.333	No	12626	0.393	No	170895	0.263	No
ECHDC1	55862	0.243	No	52665	0.304	No	361465	0.442	No
OGFOD3	79701	0.241	No	66179	0.422	No	303749	0.325	No
AIP	9049	0.257	No	11632	0.322	No	282827	0.408	No
RTCA	8634	0.253	No	66368	0.41	No	295395	0.324	No
NPM3	10360	0.376	No	18150	0.281	No	N/A	N/A	N/A
EMC3	55831	0.407	No	66087	0.332	No	312640	0.245	No
COPS7A	50813	0.257	No	26894	0.29	No	312710	0.437	No
NUDT8	254552	0.253	No	66387	0.605	No	361692	0.126	No
OCIAD1	54940	0.137	No	68095	0.333	No	289590	0.514	No
UCHL5	51377	0.25	No	56207	0.35	No	360853	0.383	No
SPR	6697	0.311	No	20751	0.455	No	29270	0.216	No
TRUB2	26995	0.493	No	227682	0.102	No	366012	0.385	No
NKIRAS1	28512	0.206	No	69721	0.433	No	305751	0.34	No
SELENOF	9403	0.241	No	93684	0.331	No	113922	0.407	No
OCIAD2	132299	0.433	No	433904	0.219	No	N/A	N/A	N/A
NMRAL1	57407	0.302	No	67824	0.118	No	287063	0.558	No
TRPT1	83707	0.377	No	107328	0.29	No	293704	0.31	No
CXorf40A	91966	0.239	No	68618	0.562	No	292328	0.175	No
MYL12B	103910	0.472	No	67938	0.285	No	50685	0.219	No
PSMD12	5718	0.197	No	66997	0.431	No	287772	0.347	No
PDE6D	5147	0.326	No	18582	0.282	No	363272	0.365	No
AGA	175	0.203	No	11593	0.352	No	290923	0.418	No
NIPSNAP1	8508	0.235	No	18082	0.271	No	360971	0.466	No
HPRT1	3251	0.354	No	15452	0.283	No	24465	0.334	No
TFAM	7019	0.252	No	21780	0.429	No	83474	0.29	No
RPAIN	84268	0.248	No	69723	0.262	No	287463	0.461	No
C1orf174	339448	0.162	No	97159	0.477	No	362671	0.332	No
C8orf76	84933	0.328	No	75758	0.319	No	N/A	N/A	N/A
MRPS27	23107	0.289	No	218506	0.492	No	361883	0.189	No
IFT27	11020	0.257	No	67042	0.346	No	300062	0.367	No
ABHD14A-ACY1	100526760	0.184	No	109652	0.331	No	300981	0.454	No
SIRT5	23408	0.136	No	68346	0.437	No	306840	0.396	No
TSG101	7251	0.342	No	22088	0.358	No	292925	0.268	No
ITGB1BP1	9270	0.33	No	16413	0.342	No	298914	0.296	No
PLEKHJ1	55111	0.439	No	78670	0.187	No	314634	0.341	No
UNC50	25972	0.287	No	67387	0.278	No	192356	0.402	No
TSTD1	100131187	0.435	No	226654	0.117	No	100359478	0.415	No
ITPA	3704	0.335	No	16434	0.368	No	311422	0.263	No
FAM136A	84908	0.298	No	66488	0.433	No	297415	0.235	No
FITM2	128486	0.176	No	228859	0.287	No	311617	0.503	No
ERP29	10961	0.39	No	67397	0.217	No	117030	0.357	No
DARS2	55157	0.211	No	226539	0.328	No	304919	0.425	No
EIF4E2	9470	0.472	No	26987	0.187	No	363275	0.305	No
PLA2G12A	81579	0.26	No	66350	0.358	No	362039	0.346	No
C1orf50	79078	0.472	No	230696	0.119	No	313551	0.372	No
SSR2	6746	0.37	No	66256	0.352	No	295235	0.241	No
MRRF	92399	0.335	No	67871	0.39	No	311903	0.238	No
C19orf24	55009	0.407	No	69770	0.324	No	500795	0.231	No
REXO2	25996	0.241	No	104444	0.412	No	300689	0.309	No
KLHDC2	23588	0.236	No	69554	0.277	No	299113	0.448	No
NACA2	342538	0.132	No	17938	0.463	No	288770	0.366	No
GALT	2592	0.117	No	14430	0.368	No	298003	0.476	No
C6orf89	221477	-0.044	No	80748	0.455	No	294311	0.548	No
DTD1	92675	0.295	No	66044	0.354	No	362227	0.31	No
C14orf119	55017	0.282	No	58248	0.365	No	361038	0.312	No
PNPLA4	8228	0.336	No	N/A	N/A	N/A	363471	0.303	No
HSPD1	3329	0.241	No	15510	0.398	No	N/A	N/A	N/A
IMP4	92856	0.546	No	27993	0.111	No	316317	0.301	No
RER1	11079	0.31	No	67830	0.366	No	298675	0.28	No
TFB2M	64216	0.297	No	15278	0.31	No	289307	0.348	No
SVBP	374969	0.264	No	69216	0.393	No	362578	0.296	No
SMIM10L1	100129361	0.3	No	381820	0.259	No	100360120	0.393	No
TMEM59	9528	0.261	No	56374	0.135	No	100196907	0.556	No
TMEM192	201931	0.112	No	73067	0.422	No	361137	0.418	No
SCO2	9997	0.314	Yes	100126824	0.32	No	N/A	N/A	N/A
EBAG9	9166	0.356	No	55960	0.225	No	299864	0.369	No
PTCD2	79810	0.09	No	68927	0.518	No	310025	0.342	No
TM2D3	80213	0.103	No	68634	0.53	No	N/A	N/A	N/A
VBP1	7411	0.511	No	22327	0.191	No	681825	0.247	No
RTCB	51493	0.456	No	28088	0.18	No	362855	0.313	No
CNIH4	29097	0.411	No	98417	0.397	No	289324	0.141	No
PQBP1	10084	0.377	No	54633	0.202	No	302557	0.37	No
TMEM53	79639	0.187	No	68777	0.322	No	313529	0.44	No
NUDT5	11164	0.406	No	53893	0.322	No	361274	0.22	No
GDE1	51573	0.21	No	56209	0.422	No	N/A	N/A	N/A
EBPL	84650	0.356	No	68177	0.378	No	361054	0.212	No
DUSP23	54935	0.438	No	68440	0.192	No	N/A	N/A	N/A
TRMT10C	54931	0.382	No	52575	0.325	No	304012	0.238	No
COQ8A	56997	0.042	No	67426	0.354	No	360887	0.549	No
SNRPD1	6632	0.535	No	20641	0.371	No	291794	0.038	No
NSDHL	50814	0.406	No	18194	0.213	No	309262	0.325	No
CCT5	22948	0.322	No	12465	0.369	No	294864	0.253	No
TXNDC9	10190	0.312	No	98258	0.236	No	280671	0.395	No
EXOSC7	23016	0.475	No	66446	0.336	No	316098	0.131	No
KARS	3735	0.437	No	85305	0.3	No	292028	0.205	No
GLRX	2745	0.372	No	93692	0.361	No	64045	0.209	No
AFG1L	246269	0.155	No	215951	0.473	No	N/A	N/A	N/A
SCOC	60592	0.272	No	56367	0.188	No	364981	0.481	No
DIABLO	56616	0.388	No	66593	0.267	No	288753	0.285	No
TMEM9	252839	0.244	No	66241	0.282	No	289046	0.414	No
TCP1	6950	0.288	No	21454	0.407	No	24818	0.243	No
HIST1H2BI	8346	0.095	No	68024	0.325	No	64647	0.517	No
TMEM14A	28978	0.395	No	75712	0.229	No	N/A	N/A	N/A
PEMT	10400	0.367	No	18618	0.313	No	25511	0.256	No
MRPL38	64978	0.292	No	60441	0.425	No	303685	0.219	No
DOLK	22845	0.157	No	227697	0.344	No	311847	0.435	No
SOD2	6648	0.013	No	20656	0.609	No	24787	0.314	No
EEF1D	1936	0.263	No	66656	0.29	No	300033	0.382	No
N6AMT1	29104	0.138	No	67768	0.209	No	288309	0.588	No
U2AF1L5	102724594	0.39	No	108121	0.237	No	687575	0.306	No
MRM2	29960	0.237	No	68017	0.302	No	304323	0.394	No
EIF2B2	8892	0.412	No	217715	0.201	No	84005	0.319	No
PIGX	54965	0.168	No	72084	0.434	No	288041	0.33	No
FIBP	9158	0.569	No	58249	0.137	No	282837	0.225	No
EI24	9538	0.323	No	13663	0.259	No	300514	0.348	No
PSMD1	5707	0.31	No	70247	0.236	No	83806	0.384	No
C6orf48	50854	0.31	No	N/A	N/A	N/A	N/A	N/A	N/A
TOMM40L	84134	0.274	No	641376	0.528	No	304971	0.128	No
AASDHPPT	60496	0.135	No	67618	0.336	No	300328	0.459	No
BDH1	622	0.273	No	71911	0.267	No	117099	0.389	No
UBE2M	9040	0.263	No	22192	0.284	No	361509	0.381	No
CYB5B	80777	0.199	No	66427	0.224	No	80773	0.505	No
TSEN15	116461	0.279	No	66637	0.33	No	289083	0.318	No
TRNAU1AP	54952	0.147	No	71787	0.471	No	N/A	N/A	N/A
HSD17B12	51144	0.147	No	56348	0.312	No	84013	0.467	No
EIF2B3	8891	0.512	No	108067	0.263	No	171145	0.15	No
PSME1	5720	0.368	No	19186	0.326	No	29630	0.231	No
COX18	285521	0.351	Yes	231430	0.251	No	289522	0.321	No
DHRS11	79154	0.257	No	192970	0.274	No	360583	0.391	No
MED28	80306	0.187	No	66999	0.343	No	305391	0.392	No
PPIL1	51645	0.416	No	68816	0.267	No	309651	0.238	No
CXorf40B	541578	0.183	No	68618	0.562	No	292328	0.175	No
MGST1	4257	0.255	No	56615	0.286	No	171341	0.379	No
LYPLA1	10434	0.307	No	18777	0.345	No	25514	0.267	No
CD59	966	0.1	No	333883	0.325	No	25407	0.494	No
HIST2H2AC	8338	0.256	No	319192	0.356	No	N/A	N/A	N/A
HIST1H2BC	8347	0.076	No	68024	0.325	No	64647	0.517	No
RTN4IP1	84816	0.438	No	170728	0.323	No	309912	0.155	No
MPV17	4358	0.425	No	17527	0.26	No	360463	0.231	No
FBXL15	79176	0.366	No	68431	0.314	No	309453	0.236	No
OARD1	221443	0.248	No	106821	0.383	No	367214	0.284	No
ZMAT2	153527	0.418	No	66492	0.234	No	679898	0.262	No
ANAPC16	119504	0.308	No	52717	0.227	No	100360936	0.379	No
TOMM40	10452	0.26	No	53333	0.349	No	N/A	N/A	N/A
RABEPK	10244	0.377	No	227746	0.327	No	296649	0.209	No
LRPPRC	10128	0.37	Yes	72416	0.273	No	313867	0.27	No
RAB4A	5867	0.262	No	19341	0.185	No	25532	0.466	No
DPM1	8813	0.416	No	13480	0.358	No	296394	0.138	No
BOD1	91272	0.271	No	69556	0.509	No	287173	0.132	No
AHSA1	10598	0.327	No	217737	0.29	No	681996	0.294	No
POLD4	57804	0.252	No	69745	0.209	No	361698	0.45	No
DPCD	25911	0.387	No	226162	0.396	No	294004	0.126	No
SYNJ2BP	55333	0.115	No	24071	0.262	No	64531	0.532	No
COPS8	10920	0.335	No	108679	0.267	No	363283	0.306	No
BLOC1S2	282991	0.231	No	73689	0.457	No	293938	0.22	No
LSM2	57819	0.476	No	27756	0.244	No	684148	0.188	No
POLR2C	5432	0.266	No	20021	0.482	No	361365	0.16	No
CACYBP	27101	0.409	No	12301	0.27	No	289144	0.227	No
MUT	4594	0.226	No	17850	0.378	No	N/A	N/A	N/A
CST3	1471	0.126	No	13010	0.365	No	25307	0.413	No
LGALS1	3956	0.374	No	16852	0.364	No	56646	0.165	No
UBE2F	140739	0.348	No	67921	0.219	No	363284	0.336	No
AP1S1	1174	0.315	No	11769	0.322	No	360785	0.266	No
PAXX	286257	0.146	No	227622	0.229	No	296565	0.528	No
NDRG2	57447	0.088	No	29811	0.316	No	171114	0.497	No
COA1	55744	0.3	No	N/A	N/A	N/A	N/A	N/A	N/A
TMEM99	147184	0.3	No	N/A	N/A	N/A	N/A	N/A	N/A
CFAP36	112942	0.202	No	216618	0.217	No	289859	0.481	No
PXMP4	11264	0.188	No	59038	0.31	No	282634	0.401	No
EPHX2	2053	0.133	No	13850	0.391	No	65030	0.375	No
NUBP1	4682	0.359	No	26425	0.248	No	287042	0.292	No
SEPHS2	22928	0.243	No	20768	0.356	No	N/A	N/A	N/A
PSMD7	5713	0.425	No	17463	0.293	No	307821	0.18	No
HCCS	3052	0.404	No	15159	0.186	No	317444	0.308	No
CALM2	805	0.268	No	12315	0.243	No	24242	0.387	No
HEBP1	50865	0.245	No	15199	0.33	No	362454	0.323	No
SUMO2	6613	0.299	No	N/A	N/A	N/A	N/A	N/A	N/A
PIH1D1	55011	0.419	No	68845	0.444	No	292898	0.033	No
PSMC6	5706	0.283	No	67089	0.351	No	289990	0.262	No
SERF1B	8293	0.301	No	20365	0.296	No	N/A	N/A	N/A
CYB561D2	11068	0.265	No	56368	0.283	No	363137	0.347	No
SLC25A39	51629	0.196	No	68066	0.383	No	360636	0.316	No
FKBPL	63943	0.11	No	56299	0.299	No	406168	0.486	No
COQ4	51117	0.314	No	227683	0.364	No	366013	0.216	No
XRCC6	2547	0.279	No	14375	0.324	No	25019	0.291	No
KXD1	79036	0.131	No	75620	0.418	No	498606	0.344	No
AGPAT2	10555	0.128	No	67512	0.35	No	311821	0.415	No
PIGBOS1	101928527	0.297	No	N/A	N/A	N/A	N/A	N/A	N/A
SPTSSA	171546	0.268	No	104725	0.369	No	500651	0.254	No
PDSS2	57107	0.239	No	71365	0.321	No	365592	0.331	No
FASTK	10922	0.213	No	66587	0.381	No	N/A	N/A	N/A
ACSF3	197322	-0.026	No	257633	0.408	No	498962	0.509	No
TCEAL8	90843	0.333	No	66684	0.202	No	367909	0.355	No
RFC4	5984	0.278	No	106344	0.372	No	288003	0.24	No
CLPB	81570	0.147	No	20480	0.399	No	65041	0.344	No
LSM6	11157	0.435	No	78651	0.345	No	498934	0.109	No
NARFL	64428	0.092	No	67563	0.432	No	360496	0.365	No
SURF2	6835	0.386	No	20931	0.23	No	619345	0.272	No
ITGB3BP	23421	0.313	No	67733	0.231	No	362548	0.344	No
TXNDC15	79770	0.185	No	69672	0.24	No	307180	0.463	No
ACSS2	55902	0.169	No	60525	0.279	No	311569	0.439	No
SUGT1	10910	0.194	No	67955	0.408	No	290408	0.284	No
IMPA2	3613	0.18	No	114663	0.338	No	282636	0.368	No
GPT	2875	0.115	No	76282	0.392	No	81670	0.378	No
PSPH	5723	0.161	No	100678	0.382	No	304429	0.341	No
SNRPB2	6629	0.483	No	20639	0.262	No	362223	0.138	No
NELFE	7936	0.407	No	27632	0.21	No	294258	0.266	No
ITGAE	3682	0.406	No	16407	0.05	No	83577	0.427	No
HACL1	26061	0.347	No	56794	0.181	No	85255	0.355	No
PAICS	10606	0.26	No	67054	0.259	No	140946	0.364	No
VTI1B	10490	0.294	No	N/A	N/A	N/A	N/A	N/A	N/A
ABHD17A	81926	0.066	No	216169	0.386	No	299617	0.43	No
REEP5	7905	0.33	No	13476	0.199	No	364838	0.352	No
TM7SF2	7108	0.185	No	73166	0.376	No	293688	0.32	No
FASTKD1	79675	0.336	No	320720	0.251	No	N/A	N/A	N/A
SIL1	64374	0.314	No	81500	0.13	No	291673	0.436	No
BCKDK	10295	0.158	No	12041	0.369	No	29603	0.353	No
CCDC28B	79140	0.15	No	66264	0.247	No	682445	0.483	No
CRYL1	51084	0.27	No	68631	0.232	No	290277	0.377	No
C15orf65	145788	0.17	No	546143	0.303	No	691849	0.406	No
PDAP1	11333	0.122	No	231887	0.372	No	64527	0.385	No
TBC1D7	51256	0.355	No	67046	0.403	No	361227	0.12	No
PPIL3	53938	0.29	No	70225	0.39	No	301432	0.197	No
FGGY	55277	0.18	No	75578	0.19	No	298250	0.507	No
PRDX6	9588	0.407	No	11758	0.239	No	94167	0.23	No
ADSSL1	122622	0.108	No	11565	0.312	No	684425	0.456	No
CDC34	997	0.101	No	216150	0.487	No	299602	0.288	No
TATDN1	83940	0.438	No	69694	0.38	No	690068	0.056	No
OSGEPL1	64172	0.114	No	72085	0.391	No	314548	0.369	No
RPP14	11102	0.226	No	67053	0.435	No	361020	0.212	No
FXYD1	5348	0.042	No	56188	0.427	No	58971	0.404	No
IVD	3712	0.15	No	56357	0.287	No	24513	0.435	No
RPS4X	6191	0.296	No	20102	0.285	No	N/A	N/A	N/A
OSGEP	55644	0.182	No	66246	0.491	No	290028	0.198	No
TPD52L1	7164	0.16	No	21987	0.429	No	689256	0.282	No
SNRPN	6638	0.136	No	20646	0.279	No	81781	0.456	No
GTF2B	2959	0.318	No	229906	0.265	No	81673	0.287	No
GEMIN7	79760	0.177	No	69731	0.358	No	499391	0.335	No
NOSIP	51070	0.395	No	66394	0.161	No	292894	0.313	No
FAM32A	26017	0.392	No	67922	0.227	No	498600	0.25	No
ATG101	60673	0.287	No	68118	0.382	No	300240	0.2	No
DHRS7	51635	0.185	No	66375	0.36	No	299135	0.324	No
FOPNL	123811	0.22	No	66086	0.407	No	360461	0.242	No
VEGFB	7423	0.099	No	22340	0.397	No	89811	0.371	No
POLE3	54107	0.237	No	59001	0.313	No	298098	0.316	No
AMACR	23600	0.079	No	17117	0.396	No	25284	0.391	No
COX19	90639	-0.114	No	68033	0.61	No	304330	0.37	No
HIST2H2AA3	8337	0.18	No	15267	0.266	No	365877	0.419	No
HIST2H2AA4	723790	0.18	No	15267	0.266	No	365877	0.419	No
APMAP	57136	0.125	No	71881	0.295	No	366227	0.445	No
PINK1	65018	0.119	No	68943	0.321	No	298575	0.425	No
MLX	6945	0.252	No	21428	0.276	No	360631	0.336	No
NUDT9	53343	0.322	No	74167	0.338	No	305149	0.203	No
UFSP1	402682	0.156	No	70240	0.419	No	N/A	N/A	N/A
EIF2B1	1967	0.253	No	209354	0.399	No	64514	0.21	No
MPI	4351	0.198	No	110119	0.356	No	300741	0.308	No
AES	166	0.134	No	14797	0.401	No	29466	0.327	No
MED29	55588	0.007	No	67224	0.309	No	292751	0.546	No
FUNDC1	139341	0.421	No	72018	0.164	No	363442	0.276	No
ADH5	128	0.28	No	11532	0.526	No	29646	0.055	No
TOR1A	1861	0.116	No	30931	0.333	No	266606	0.412	No
CCT2	10576	0.41	No	12461	0.194	No	299809	0.256	No
CCNG1	900	0.221	No	12450	0.303	No	25405	0.336	No
NT5M	56953	0.119	No	103850	0.474	No	287368	0.267	No
CRADD	8738	0.402	No	12905	0.171	No	N/A	N/A	N/A
ENO1	2023	0.22	No	13806	0.353	No	N/A	N/A	N/A
TMEM120A	83862	0.252	No	215210	0.438	No	288591	0.169	No
OCEL1	79629	0.194	No	77090	0.159	No	290628	0.506	No
COQ10B	80219	0.2	Yes	67876	0.316	Yes	301416	0.342	Yes
IFI27	3429	0.098	No	52668	0.295	No	170512	0.465	No
NUDCD2	134492	0.45	No	52653	0.299	No	287199	0.109	No
CISD2	493856	0.334	No	67006	0.178	No	295457	0.346	No
PMF1-BGLAP	100527963	0.286	No	N/A	N/A	N/A	N/A	N/A	N/A
PEX2	5828	0.273	No	19302	0.285	No	29534	0.3	No
ALDH9A1	223	0.251	No	56752	0.248	No	64040	0.359	No
TMEM177	80775	0.313	No	66343	0.257	No	304735	0.287	No
EIF2S2	8894	0.296	No	67204	0.262	No	296302	0.299	No
AFG3L2	10939	0.335	No	69597	0.301	No	307350	0.22	No
FAH	2184	0.316	No	14085	0.219	No	29383	0.321	No
ATP6V0D1	9114	0.193	No	11972	0.21	No	291969	0.453	No
CRYZ	1429	0.138	No	12972	0.354	No	362061	0.364	No
UBE2E1	7324	0.319	No	22194	0.251	No	N/A	N/A	N/A
ALKBH6	84964	0.18	No	233065	0.39	No	N/A	N/A	N/A
FKBP4	2288	0.188	No	14228	0.259	No	260321	0.408	No
UFD1	7353	0.511	No	22230	0.102	No	84478	0.241	No
JKAMP	51528	0.188	No	104771	0.346	No	299127	0.319	No
DTNBP1	84062	0.039	No	94245	0.436	No	641528	0.378	No
C8orf33	65265	0.304	No	117171	0.214	No	681282	0.334	No
GSTM4	2948	0.197	No	14865	0.265	No	499689	0.39	No
BPNT1	10380	0.176	No	23827	0.27	No	64473	0.406	No
FAM104B	90736	0.284	No	N/A	N/A	N/A	N/A	N/A	N/A
ATG3	64422	0.32	No	67841	0.228	No	171415	0.303	No
ACTR6	64431	0.272	No	67019	0.409	No	314718	0.17	No
NTMT1	28989	0.414	No	66617	0.286	No	362103	0.15	No
BCAS2	10286	0.323	No	68183	0.255	No	295334	0.272	No
H2AFJ	55766	0.167	No	232440	0.27	No	690795	0.413	No
MTERF2	80298	0.066	No	74238	0.39	No	366856	0.394	No
AKR1E2	83592	0.009	No	56043	0.358	No	307091	0.483	No
DERL2	51009	0.321	No	116891	0.282	No	100910823	0.246	No
PCYT2	5833	0.184	No	68671	0.288	No	89841	0.376	No
NT5C3A	51251	0.098	No	107569	0.274	No	312373	0.476	No
ARPC1A	10552	0.294	No	56443	0.271	No	N/A	N/A	N/A
RPL4	6124	0.326	No	67891	0.265	No	64302	0.256	No
PDRG1	81572	0.316	No	68559	0.363	No	296278	0.167	No
GGACT	87769	0.122	No	223267	0.29	No	290500	0.434	No
EIF3E	3646	0.279	No	16341	0.313	No	299872	0.253	No
RWDD2B	10069	0.252	No	53858	0.311	No	304132	0.282	No
NSMCE4A	54780	0.255	No	67872	0.308	No	N/A	N/A	N/A
ALKBH2	121642	0.244	No	231642	0.167	No	304578	0.433	No
CNBP	7555	0.22	No	12785	0.295	No	64530	0.329	No
ZNF576	79177	0.281	No	N/A	N/A	N/A	N/A	N/A	N/A
DYNLT1	6993	0.414	No	21648	0.355	No	83462	0.073	No
RACK1	10399	0.245	No	14694	0.237	No	83427	0.36	No
CCT4	10575	0.415	No	12464	0.157	No	29374	0.269	No
TMEM128	85013	0.208	No	66309	0.365	No	360952	0.268	No
PDK2	5164	0.106	No	18604	0.275	No	81530	0.46	No
AGPAT3	56894	0.049	No	28169	0.325	No	294324	0.467	No
IARS2	55699	0.324	No	381314	0.211	No	364070	0.305	No
EIF3L	51386	0.288	No	223691	0.282	No	300069	0.269	No
GALK1	2584	0.186	No	14635	0.261	No	287835	0.392	No
TSACC	128229	0.067	No	76927	0.492	No	N/A	N/A	N/A
PRKRA	8575	0.159	No	23992	0.292	No	311130	0.387	No
CBY1	25776	0.103	No	73739	0.343	No	246768	0.391	No
RPL14	9045	0.403	No	67115	0.325	No	65043	0.108	No
ACOT2	10965	0.343	No	26897	0.214	No	192272	0.279	No
RPL37	6167	0.237	No	67281	0.435	No	81770	0.164	No
TARBP2	6895	0.249	No	21357	0.345	No	363006	0.241	No
NUBP2	10101	0.342	No	26426	0.211	No	287125	0.281	No
TTC19	54902	0.147	No	72795	0.246	No	691506	0.441	No
MAP2K2	5605	0.119	No	26396	0.336	No	58960	0.379	No
GYG1	2992	0.293	No	27357	0.321	No	81675	0.219	No
FECH	2235	0.166	No	14151	0.193	No	361338	0.474	No
MT-ND6	4541	0.243	Yes	17722	0.312	Yes	N/A	N/A	N/A
PPP2R3C	55012	0.154	No	59032	0.25	No	362739	0.428	No
GPD1	2819	0.049	No	14555	0.313	No	60666	0.47	No
GGCT	79017	0.433	No	110175	0.253	No	362368	0.145	No
ZDHHC4	55146	0.366	No	72881	0.149	No	304291	0.316	No
RPUSD3	285367	0.293	No	101122	0.204	No	362416	0.334	No
TMEM199	147007	0.268	No	195040	0.3	No	303332	0.263	No
DGAT1	8694	0.177	No	13350	0.273	No	84497	0.381	No
MTIF2	4528	0.385	No	76784	0.225	No	305606	0.22	No
BRI3	25798	0.189	No	55950	0.364	No	304284	0.277	No
KYAT3	56267	0.173	No	229905	0.38	No	N/A	N/A	N/A
SPRYD7	57213	0.143	No	66674	0.296	No	290303	0.389	No
SCRN2	90507	0.138	No	217140	0.274	No	360612	0.415	No
TMEM238	388564	0.156	No	664968	0.395	No	N/A	N/A	N/A
CCT3	7203	0.447	No	12462	0.223	No	295230	0.156	No
PDCL3	79031	0.345	No	68833	0.288	No	316348	0.193	No
DUS1L	64118	0.232	No	68730	0.311	No	246185	0.283	No
ABHD14A	25864	0.304	No	68644	0.318	No	300982	0.203	No
NGDN	25983	0.217	No	68966	0.391	No	305887	0.217	No
ARV1	64801	0.476	No	68865	0.084	No	292097	0.264	No
CFAP20	29105	0.299	No	14894	0.242	No	307642	0.283	No
FTL	2512	0.142	No	14325	0.232	No	29292	0.45	No
CARS2	79587	0.116	No	71941	0.226	No	361184	0.482	No
RILP	83547	0.236	No	280408	0.313	No	N/A	N/A	N/A
CHMP5	51510	0.306	No	76959	0.227	No	297995	0.29	No
TSPO	706	0.356	No	12257	0.315	No	24230	0.151	No
VAMP5	10791	0.251	No	53620	0.178	No	89818	0.393	No
MTERF3	51001	0.243	No	66410	0.203	No	299514	0.375	No
FAM50A	9130	0.181	No	108160	0.18	No	293862	0.46	No
NABP2	79035	0.305	No	69917	0.235	No	362813	0.28	No
SELENBP1	8991	0.116	No	20341	0.299	No	140927	0.405	No
SNUPN	10073	0.366	No	66069	0.228	No	316108	0.225	No
MANF	7873	0.362	No	74840	0.171	No	315989	0.286	No
SPATA24	202051	0.217	No	71242	0.231	No	291676	0.371	No
RITA1	84934	0.342	No	100764	0.207	No	288683	0.269	No
RWDD4	201965	0.244	No	192174	0.301	No	N/A	N/A	N/A
ZFYVE21	79038	0.105	No	68520	0.314	No	362789	0.398	No
DDX1	1653	0.429	No	104721	0.218	No	84474	0.169	No
PMM1	5372	0.253	No	29858	0.376	No	300089	0.187	No
LAMTOR3	8649	0.243	No	56692	0.289	No	362045	0.284	No
RABGGTB	5876	0.243	No	19352	0.334	No	25533	0.238	No
H3F3A	3020	0.228	No	15078	0.315	No	N/A	N/A	N/A
YEATS4	8089	0.251	No	64050	0.216	No	299810	0.347	No
PDCD6	10016	0.243	No	18570	0.386	No	308061	0.184	No
AGL	178	0.11	No	77559	0.184	No	362029	0.519	No
YIPF1	54432	0.147	No	230584	0.3	No	298312	0.365	No
AVPI1	60370	0.11	No	69534	0.397	No	171386	0.305	No
RPP38	10557	0.239	No	227522	0.396	No	291317	0.176	No
C22orf39	128977	0.28	No	72307	0.26	No	N/A	N/A	N/A
CALM3	808	0.18	No	12315	0.243	No	24242	0.387	No
TAF12	6883	0.339	No	66464	0.381	No	682902	0.089	No
AVEN	57099	0.251	No	74268	0.241	No	311299	0.317	No
RNASEH2B	79621	0.098	No	67153	0.292	No	361056	0.419	No
BSCL2	26580	0.229	No	14705	0.31	No	N/A	N/A	N/A
NUP37	79023	0.478	No	69736	0.267	No	299706	0.063	No
CCDC90B	60492	0.197	No	66365	0.405	No	308820	0.206	No
DNPEP	23549	0.168	No	13437	0.281	No	301529	0.359	No
NAPRT	93100	0.15	No	223646	0.223	No	315085	0.435	No
TFPT	29844	0.374	No	69714	0.268	No	85423	0.165	No
MAGOHB	55110	0.215	No	66441	0.323	No	N/A	N/A	N/A
NGRN	51335	0.32	No	83485	0.344	No	499191	0.142	No
GMPR2	51292	0.282	No	105446	0.193	No	192357	0.33	No
FAM92A	137392	0.114	No	68099	0.332	No	297903	0.359	No
CTH	1491	0.082	No	107869	0.246	No	24962	0.477	No
ACBD6	84320	0.311	No	72482	0.26	No	289125	0.233	No
STRAP	11171	0.272	No	20901	0.291	No	297699	0.241	No
RAB2A	5862	0.176	No	59021	0.193	No	65158	0.435	No
ARL16	339231	0.166	No	70317	0.112	No	688311	0.526	No
WDR83	84292	0.186	No	67836	0.349	No	N/A	N/A	N/A
DTD2	112487	0.181	No	328092	0.167	No	366619	0.454	No
MLF2	8079	0.169	No	30853	0.224	No	312709	0.409	No
ROGDI	79641	0.165	No	66049	0.178	No	287061	0.459	No
ALDH5A1	7915	0.104	No	214579	0.258	No	291133	0.44	No
SUMO3	6612	0.393	No	20610	0.102	No	499417	0.306	No
RPF1	80135	0.336	No	70285	0.198	No	N/A	N/A	N/A
EIF2D	1939	0.334	No	16865	0.261	No	498225	0.206	No
FAM213A	84293	0.162	No	70564	0.376	No	361118	0.263	No
RAB28	9364	0.064	No	100972	0.287	No	117049	0.45	No
C18orf21	83608	0.391	No	68046	0.288	No	498830	0.121	No
PCNA	5111	0.352	No	18538	0.269	No	25737	0.179	No
FUCA1	2517	0.077	No	71665	0.189	No	24375	0.533	No
MRTO4	51154	0.304	No	69902	0.472	No	298586	0.023	No
NUDC	10726	0.259	No	18221	0.215	No	29648	0.325	No
BNIP3	664	0.195	No	12176	0.294	No	84480	0.31	No
HDHD3	81932	0.122	No	72748	0.285	No	688746	0.392	No
RPL28	6158	0.266	No	N/A	N/A	N/A	N/A	N/A	N/A
RBM8A	9939	0.102	No	60365	0.21	No	295284	0.486	No
ISOC1	51015	0.274	No	66307	0.095	No	364879	0.428	No
MED10	84246	0.228	No	28077	0.307	No	290939	0.262	No
ABCD3	5825	0.128	No	19299	0.247	No	25270	0.422	No
SELENOS	55829	0.317	No	109815	0.165	No	286900	0.314	No
ZNF124	7678	-0.017	No	668039	0.522	No	691280	0.291	No
COG4	25839	0.104	No	102339	0.334	No	361407	0.357	No
DYNLT3	6990	0.1	No	67117	0.263	No	363448	0.432	No
ME1	4199	0.102	No	17436	0.284	No	24552	0.408	No
GTPBP8	29083	0.363	No	66067	0.166	No	N/A	N/A	N/A
NSMCE2	286053	0.467	No	68501	0.135	No	299957	0.191	No
COA7	65260	0.185	No	69893	0.406	No	298377	0.202	No
ACOT7	11332	0.241	No	70025	0.348	No	26759	0.204	No
POLR1C	9533	0.236	No	20016	0.361	No	301246	0.196	No
CAT	847	0.15	No	12359	0.183	No	24248	0.459	No
PPP1R14B	26472	0.234	No	18938	0.307	No	259225	0.249	No
ANP32A	8125	0.151	No	11737	0.224	No	25379	0.415	No
TANGO2	128989	0.053	No	27883	0.267	No	360738	0.47	No
PPP1CC	5501	0.257	No	19047	0.147	No	24669	0.385	No
FBXO6	26270	0.177	No	50762	0.21	No	192351	0.401	No
ME3	10873	0.069	No	109264	0.24	No	361602	0.479	No
BZW2	28969	0.365	No	66912	0.248	No	171439	0.174	No
GEMIN2	8487	0.293	No	66603	0.269	No	84404	0.225	No
CDK2AP2	10263	0.194	No	52004	0.204	No	688405	0.389	No
PGAM4	441531	0.262	No	N/A	N/A	N/A	N/A	N/A	N/A
DPH5	51611	0.398	No	69740	0.183	No	295394	0.204	No
COMMD8	54951	0.378	No	27784	0.101	No	289603	0.306	No
ACOT1	641371	0.292	No	26897	0.214	No	192272	0.279	No
ABT1	29777	0.183	No	30946	0.282	No	306960	0.32	No
COMMD10	51397	0.406	No	69456	0.147	No	361323	0.231	No
EXOSC3	51010	0.275	No	66362	0.266	No	313243	0.243	No
GATC	283459	0.13	No	384281	0.11	No	360821	0.544	No
PANK1	53354	0.104	No	75735	0.247	No	294088	0.432	No
C11orf54	28970	0.07	No	70984	0.328	No	363016	0.385	No
OGDH	4967	0.113	No	18293	0.198	No	360975	0.471	No
SLC25A19	60386	0.198	No	67283	0.331	No	303676	0.251	No
TUBG1	7283	0.319	No	103733	0.257	No	252921	0.203	No
BET1	10282	0.204	No	12068	0.315	No	29631	0.26	No
NME6	10201	0.15	No	54369	0.38	No	58964	0.249	No
LHPP	64077	0.117	No	76429	0.298	No	361663	0.363	No
CMPK1	51727	0.114	No	66588	0.301	No	298410	0.363	No
MIF4GD	57409	0.246	No	69674	0.138	No	360659	0.393	No
BUD23	114049	0.374	No	66138	0.243	No	368084	0.158	No
SAC3D1	29901	0.218	No	66406	0.298	No	N/A	N/A	N/A
PDXP	57026	0.159	No	N/A	N/A	N/A	727679	0.357	No
SFXN4	119559	0.518	No	94281	0.14	No	361778	0.115	No
FAM210A	125228	0.185	No	108654	0.259	No	307343	0.328	No
ERGIC3	51614	0.237	No	66366	0.251	No	296306	0.284	No
EIF6	3692	0.482	No	16418	0.202	No	305506	0.087	No
TMEM106C	79022	0.32	No	380967	0.166	No	315286	0.285	No
GLUD1	2746	0.172	No	14661	0.13	No	24399	0.469	No
TCTA	6988	0.263	No	102791	0.139	No	306587	0.368	No
THEM4	117145	0.065	No	75778	0.368	No	361992	0.337	No
MANBAL	63905	0.236	No	69161	0.113	No	499934	0.42	No
SLC37A4	2542	0.121	No	14385	0.236	No	29573	0.412	No
PEX3	8504	0.104	No	56535	0.305	No	83519	0.36	No
PRR13	54458	0.256	No	N/A	N/A	N/A	N/A	N/A	N/A
FAF1	11124	0.212	No	14084	0.262	No	140657	0.293	No
ARPP19	10776	0.158	No	59046	0.352	No	60336	0.257	No
TMLHE	55217	0.157	No	192289	0.113	No	170898	0.497	No
TAF13	6884	0.153	No	99730	0.313	No	310784	0.301	No
LACTB	114294	0.08	No	80907	0.291	No	300803	0.396	No
SNRNP35	11066	0.152	No	76167	0.359	No	N/A	N/A	N/A
COMMD7	149951	0.311	No	99311	0.093	No	296285	0.362	No
TCEA3	6920	0.119	No	21401	0.217	No	298559	0.43	No
TMEM97	27346	0.249	No	69071	0.303	No	303330	0.213	No
YBX1	4904	0.242	No	22608	0.268	No	N/A	N/A	N/A
VAMP7	6845	0.166	No	20955	0.141	No	85491	0.458	No
ATP6V0C	527	0.144	No	11984	0.172	No	170667	0.449	No
ACAT2	39	0.406	No	110460	0.298	No	308100	0.06	No
HDAC3	8841	0.223	No	15183	0.286	No	N/A	N/A	N/A
C15orf40	123207	0.142	No	67290	0.425	No	293059	0.196	No
UBE2D4	51619	0.254	No	N/A	N/A	N/A	N/A	N/A	N/A
MED8	112950	0.233	No	80509	0.275	No	N/A	N/A	N/A
RNF14	9604	0.312	No	56736	0.096	No	619577	0.353	No
ABCB6	10058	0.051	No	74104	0.295	No	140669	0.415	No
HAUS7	55559	0.157	No	73738	0.348	No	293844	0.255	No
TCTEX1D2	255758	0.366	No	66061	0.295	No	498095	0.098	No
PYM1	84305	0.329	No	78428	0.177	No	N/A	N/A	N/A
SHMT2	6472	0.239	No	108037	0.168	No	299857	0.352	No
TMEM183A	92703	0.244	No	57439	0.152	No	289034	0.362	No
VWA8	23078	0.127	No	219189	0.246	No	290381	0.385	No
ACO1	48	0.117	No	11428	0.184	No	50655	0.457	No
DRAM2	128338	0.2	No	67171	0.188	No	362011	0.369	No
PPP1R7	5510	0.53	No	66385	-0.026	No	N/A	N/A	N/A
NIF3L1	60491	0.487	No	65102	0.239	No	301431	0.03	No
NBDY	550643	0.252	No	N/A	N/A	N/A	N/A	N/A	N/A
L3HYPDH	112849	0.092	No	67217	0.286	No	314214	0.378	No
ERCC1	2067	0.367	No	13870	0.141	No	292673	0.247	No
MRS2	57380	0.323	No	380836	0.172	No	79032	0.26	No
TATDN3	128387	0.242	No	68972	0.261	No	N/A	N/A	N/A
SPCS2	9789	0.305	No	66624	0.183	No	293142	0.266	No
NDFIP1	80762	0.194	No	65113	0.188	No	291609	0.372	No
LETM1	3954	0.125	No	56384	0.241	No	305457	0.388	No
ALDH1A1	216	0.112	No	26358	0.224	No	24188	0.418	No
MRPS2	51116	0.375	No	118451	0.193	No	362094	0.185	No
SELENOT	51714	0.26	No	69227	0.242	No	N/A	N/A	N/A
MTO1	25821	0.129	No	68291	0.216	No	300852	0.408	No
FRG1	2483	0.27	No	14300	0.226	No	686103	0.256	No
FAM216A	29902	0.2	No	68948	0.231	No	288667	0.321	No
ATP6V1H	51606	0.163	No	108664	0.259	No	297797	0.33	No
KIAA0391	9692	0.163	No	66132	0.146	No	299050	0.443	No
QRSL1	55278	0.113	No	76563	0.352	No	309911	0.287	No
FN3K	64122	0.029	No	63828	0.369	No	498034	0.354	No
TXNL1	9352	0.288	No	53382	0.313	No	140922	0.15	No
B9D1	27077	0.261	No	27078	0.221	No	287383	0.268	No
UBE2K	3093	0.206	No	53323	0.237	No	289623	0.307	No
BDH2	56898	0.119	No	69772	0.229	No	295458	0.402	No
SREK1IP1	285672	0.079	No	67288	0.324	No	361888	0.347	No
PTGR1	22949	0.224	No	67103	0.189	No	192227	0.336	No
RFK	55312	0.224	No	54391	0.275	No	N/A	N/A	N/A
FUCA2	2519	0.237	No	66848	0.05	No	292485	0.461	No
RAD23A	5886	0.188	No	19358	0.25	No	361381	0.31	No
GLOD4	51031	0.212	No	67201	0.346	No	363644	0.189	No
PRMT1	3276	0.334	No	15469	0.222	No	60421	0.19	No
SLC25A10	1468	0.233	No	27376	0.234	No	170943	0.279	No
ALDH7A1	501	0.183	No	110695	0.101	No	291450	0.462	No
ZADH2	284273	0.009	No	225791	0.288	No	291403	0.449	No
TMEM186	25880	0.343	No	66690	0.157	No	497863	0.245	No
RPF2	84154	0.349	No	67239	0.304	No	294436	0.092	No
G0S2	50486	0.053	No	14373	0.294	No	289388	0.398	No
METTL15	196074	0.026	No	76894	0.3	No	295985	0.419	No
SNX3	8724	0.294	No	54198	0.202	No	N/A	N/A	N/A
KIAA1191	57179	0.218	No	97820	0.2	No	306766	0.326	No
DIS3L	115752	0.16	No	213550	0.274	No	363077	0.31	No
APOC1	341	0.09	No	11812	0.395	No	25292	0.259	No
SLC25A46	91137	0.276	No	67453	0.271	No	291709	0.196	No
DNAJC12	56521	0.119	No	30045	0.179	No	619393	0.445	No
SYNGR1	9145	0.064	No	20972	0.267	No	29205	0.412	No
TXNDC12	51060	0.208	No	66073	0.287	No	298370	0.248	No
FBL	2091	0.391	No	14113	0.245	No	292747	0.106	No
DUSP19	142679	-0.055	No	68082	0.378	No	311151	0.419	No
UBE2L3	7332	0.299	No	22195	0.195	No	N/A	N/A	N/A
GTF2E2	2961	0.29	No	68153	0.21	No	306516	0.241	No
MRFAP1	93621	0.247	No	N/A	N/A	N/A	N/A	N/A	N/A
C7orf25	79020	0.132	No	105351	0.31	No	307008	0.299	No
UBE2V2	7336	0.29	No	70620	0.218	No	287927	0.232	No
EIF5A	1984	0.176	No	276770	0.391	No	287444	0.173	No
CDADC1	81602	0.075	No	71891	0.122	No	361052	0.543	No
OSBPL1A	114876	0.063	No	64291	0.21	No	259221	0.467	No
CRAT	1384	0.093	No	12908	0.298	No	311849	0.349	No
LIPT1	51601	0.144	No	623661	0.349	No	N/A	N/A	N/A
ECHDC3	79746	0.126	No	67856	0.367	No	N/A	N/A	N/A
EIF2B4	8890	0.228	No	13667	0.312	No	117019	0.199	No
RRAGA	10670	0.224	No	68441	0.202	No	117044	0.313	No
RCHY1	25898	0.134	No	68098	0.172	No	289508	0.433	No
RPP30	10556	0.265	No	54364	0.405	No	685332	0.068	No
YAE1D1	57002	0.3	No	67008	0.279	No	306994	0.159	No
IDH1	3417	0.215	No	15926	0.243	No	24479	0.28	No
HSPBP1	23640	0.191	No	66245	0.315	No	246146	0.232	No
TARS2	80222	0.143	No	71807	0.327	No	310672	0.267	No
RBP4	5950	0.065	No	19662	0.263	No	25703	0.409	No
RNASET2	8635	-0.011	No	68195	0.322	No	292306	0.426	No
LDHD	197257	0.2	No	52815	0.193	No	307858	0.343	No
BLOC1S5	63915	0.042	No	17828	0.352	No	306868	0.342	No
RDM1	201299	0.054	No	66599	0.343	No	287726	0.338	No
ILF2	3608	0.417	No	67781	0.129	No	310612	0.189	No
C1D	10438	0.264	No	57316	0.331	No	289810	0.139	No
LYRM1	57149	0.321	No	73919	0.242	No	365361	0.17	No
TMED4	222068	0.217	No	103694	0.179	No	305502	0.337	No
ATXN10	25814	0.274	No	54138	0.125	No	170821	0.333	No
LYRM7	90624	0.244	No	75530	0.178	No	686506	0.31	No
PFKM	5213	0.225	No	18642	0.302	No	65152	0.205	No
ADPRM	56985	0.158	No	66358	0.261	No	287406	0.313	No
CLPX	10845	0.137	No	270166	0.233	No	300786	0.362	No
DRG2	1819	0.104	No	13495	0.23	No	497915	0.398	No
ACP6	51205	0.098	No	66659	0.335	No	295305	0.299	No
PC	5091	0.092	No	18563	0.212	No	25104	0.428	No
TMEM69	51249	0.21	No	230657	0.241	No	619582	0.28	No
SMYD2	56950	0.098	No	226830	0.301	No	289372	0.332	No
NSFL1C	55968	0.096	No	386649	0.412	No	83809	0.223	No
HES6	55502	0.095	No	55927	0.194	No	316626	0.442	No
RFESD	317671	0.187	No	218341	0.3	No	N/A	N/A	N/A
GPN1	11321	0.437	No	74254	0.183	No	688393	0.11	No
PSMB10	5699	0.407	No	19171	0.156	No	291983	0.167	No
RPL3	6122	0.247	No	27367	0.19	No	300079	0.293	No
CA14	23632	0.011	No	23831	0.294	No	791259	0.424	No
ANAPC5	51433	0.168	No	59008	0.159	No	288671	0.401	No
HIST2H4B	554313	0.18	No	319161	0.305	No	N/A	N/A	N/A
EID1	23741	0.258	No	58521	0.078	No	499882	0.391	No
CCZ1	51622	0.144	No	231874	0.271	No	360768	0.312	No
SDSL	113675	0.237	No	257635	0.307	No	360816	0.183	No
THAP7	80764	0.161	No	69009	0.229	No	287944	0.336	No
LRPAP1	4043	0.233	No	16976	0.147	No	116565	0.346	No
EIF1AX	1964	0.147	No	66235	0.38	No	302697	0.199	No
FASTKD2	22868	0.109	No	75619	0.391	No	301463	0.226	No
PPP6C	5537	0.185	No	67857	0.191	No	171121	0.349	No
CABCOCO1	219621	0.004	No	73287	0.282	No	361834	0.439	No
EEF1G	1937	0.281	No	67160	0.282	No	293725	0.161	No
C12orf43	64897	0.117	No	72357	0.151	No	288704	0.456	No
TPGS1	91978	0.07	No	110012	0.304	No	691093	0.35	No
IDNK	414328	0.212	No	75731	0.28	No	498695	0.231	No
SUOX	6821	0.106	No	211389	0.275	No	81805	0.342	No
POLR3GL	84265	0.298	No	69870	0.184	No	N/A	N/A	N/A
HIST1H4I	8294	0.264	No	N/A	N/A	N/A	64627	0.218	No
FAM200B	285550	0.241	No	N/A	N/A	N/A	N/A	N/A	N/A
NICN1	84276	0.129	No	66257	0.153	No	619581	0.441	No
FDFT1	2222	0.299	No	14137	0.189	No	29580	0.234	No
MARCH2	51257	0.086	No	224703	0.29	No	362849	0.346	No
SERGEF	26297	0.228	No	27414	0.101	No	365243	0.391	No
TOMM70	9868	0.293	No	28185	0.207	No	304017	0.22	No
IFT43	112752	0.368	No	76411	0.271	No	299209	0.08	No
PEF1	553115	0.224	No	67898	0.222	No	297900	0.272	No
GGH	8836	0.241	No	14590	0.242	No	25455	0.235	No
NIT1	4817	0.122	No	27045	0.331	No	289222	0.264	No
POLR2D	5433	0.171	No	69241	0.306	No	364834	0.24	No
NUPR2	389493	0.161	No	69034	0.074	No	360799	0.482	No
MUL1	79594	0.099	No	68350	0.379	No	N/A	N/A	N/A
PKIG	11142	0.091	No	18769	0.294	No	266709	0.332	No
LMAN2	10960	0.257	No	66890	0.117	No	290994	0.342	No
MED6	10001	0.091	No	69792	0.317	No	299180	0.308	No
MCUR1	63933	0.337	No	76137	0.209	No	291034	0.169	No
DNAJA2	10294	0.234	No	56445	0.225	No	84026	0.256	No
RAB1B	81876	0.148	No	76308	0.293	No	100126191	0.274	No
C9orf64	84267	0.026	No	70153	0.291	No	361201	0.398	No
PDK1	5163	-0.018	No	228026	0.289	No	116551	0.444	No
LAP3	51056	0.174	No	66988	0.247	No	289668	0.294	No
ARL1	400	0.327	No	104303	0.214	No	64187	0.173	No
SLC30A9	10463	0.254	No	109108	0.218	No	498358	0.242	No
NUDT3	11165	0.089	No	56409	0.217	No	294292	0.408	No
NENF	29937	0.393	No	66208	0.474	No	289380	-0.154	No
C11orf58	10944	0.241	No	56372	0.283	No	293160	0.189	No
TUBA4A	7277	0.127	No	22145	0.314	No	316531	0.272	No
PHOSPHO2	493911	0.114	No	73373	0.301	No	295663	0.297	No
KHK	3795	0.103	No	16548	0.349	No	25659	0.26	No
ZFAND6	54469	0.156	No	65098	0.216	No	293067	0.339	No
ALDH6A1	4329	0.118	No	104776	0.24	No	81708	0.353	No
HIST1H4A	8359	0.044	No	69386	0.43	No	N/A	N/A	N/A
TCAIM	285343	0.165	No	382117	0.262	No	363169	0.283	No
OMA1	115209	0.118	No	67013	0.29	No	298282	0.302	No
MAP1LC3A	84557	0.031	No	66734	0.418	No	362245	0.261	No
CUTC	51076	0.217	No	66388	0.292	No	361760	0.2	No
HNRNPC	3183	0.236	No	N/A	N/A	N/A	N/A	N/A	N/A
SMCO4	56935	0.181	No	170748	0.166	No	363020	0.361	No
SUPV3L1	6832	0.168	No	338359	0.304	No	N/A	N/A	N/A
NAE1	8883	0.28	No	234664	0.13	No	84019	0.297	No
EIF4A3	9775	0.198	No	192170	0.231	No	688288	0.277	No
JOSD2	126119	0.123	No	66124	0.262	No	292876	0.321	No
DCAF11	80344	0.117	No	28199	0.273	No	305895	0.315	No
GSS	2937	0.314	No	14854	0.147	No	25458	0.244	No
R3HCC1	203069	0.308	No	71843	0.162	No	N/A	N/A	N/A
EIF2S1	1965	0.211	No	13665	0.3	No	54318	0.194	No
PTCD3	55037	0.097	No	69956	0.418	No	500199	0.19	No
RFXANK	8625	0.413	No	19727	0.122	No	306353	0.169	No
AP3S1	1176	0.196	No	11777	0.273	No	N/A	N/A	N/A
CINP	51550	0.392	No	67236	0.294	No	299334	0.017	No
RUVBL1	8607	0.308	No	56505	0.22	No	65137	0.175	No
CAB39L	81617	0.002	No	69008	0.229	No	290291	0.472	No
DCUN1D5	84259	0.333	No	76863	0.259	No	315405	0.11	No
NANS	54187	0.428	No	94181	0.249	No	298071	0.025	No
ABHD6	57406	0.082	No	66082	0.31	No	305795	0.31	No
FBXO8	26269	0.156	No	50753	0.187	No	306436	0.358	No
SLC27A2	11001	0.139	No	26458	0.218	No	65192	0.344	No
OVCA2	124641	0.246	No	246257	0.221	No	N/A	N/A	N/A
ABHD1	84696	0.035	No	N/A	N/A	N/A	313917	0.432	No
APEX1	328	0.353	No	11792	0.212	No	79116	0.135	No
CCDC59	29080	0.322	No	52713	0.122	No	314799	0.256	No
SLC25A17	10478	0.147	No	20524	0.311	No	300083	0.242	No
TRIR	79002	0.266	No	68544	0.119	No	288920	0.314	No
LANCL1	10314	0.115	No	14768	0.242	No	114515	0.342	No
NUDT18	79873	0.15	No	213484	0.189	No	361068	0.36	No
CYHR1	50626	0.05	No	54151	0.346	No	100362155	0.303	No
ZNF593	51042	0.571	No	68040	0.153	No	298546	-0.026	No
TMEM219	124446	0.241	No	68742	0.224	No	N/A	N/A	N/A
MPLKIP	136647	0.416	No	633057	0.16	No	684996	0.121	No
TMED9	54732	0.291	No	67511	0.101	No	361207	0.305	No
LYRM9	201229	0.077	No	66274	0.133	No	497962	0.487	No
SMPDL3A	10924	0.059	No	57319	0.2	No	294422	0.437	No
TEX30	93081	0.222	No	75623	0.288	No	301381	0.186	No
INO80C	125476	0.242	No	225280	0.16	No	291737	0.293	No
CCDC43	124808	0.235	No	52715	0.188	No	360637	0.272	No
CENPS	378708	0.387	No	69928	0.076	No	N/A	N/A	N/A
PPID	5481	0.199	No	67738	0.154	No	361967	0.341	No
PGRMC2	10424	0.131	No	70804	0.154	No	361940	0.409	No
TMEM5	10329	0.213	No	216395	0.242	No	299841	0.238	No
ATG4D	84971	0.171	No	235040	0.235	No	686505	0.287	No
MARCH5	54708	0.087	No	69104	0.281	No	294079	0.324	No
PDCD10	11235	0.329	No	56426	0.218	No	494345	0.145	No
NIFK	84365	0.226	No	67949	0.292	No	246042	0.174	No
GTF2F2	2963	0.224	No	68705	0.279	No	81674	0.188	No
PLPBP	11212	0.186	No	114863	0.151	No	306544	0.354	No
ASB8	140461	0.141	No	78541	0.179	No	315287	0.371	No
DPM2	8818	0.13	No	13481	0.244	No	29640	0.317	No
KIAA0141	9812	0.067	No	66839	0.171	No	307480	0.453	No
ACSL1	2180	0.064	No	14081	0.208	No	25288	0.419	No
TSPAN31	6302	0.213	No	67125	0.163	No	362890	0.314	No
TUBB4B	10383	0.221	No	227613	0.239	No	N/A	N/A	N/A
ASL	435	0.2	No	109900	0.283	No	59085	0.207	No
CFDP1	10428	0.152	No	23837	0.353	No	292027	0.185	No
CIB2	10518	0.032	No	56506	0.364	No	300719	0.294	No
B4GAT1	11041	0.132	No	108902	0.233	No	293667	0.324	No
HYI	81888	0.078	No	68180	0.144	No	500536	0.467	No
WDR12	55759	0.347	No	57750	0.21	No	363237	0.132	No
AK1	203	0.223	No	11636	0.236	No	N/A	N/A	N/A
HIST3H2A	92815	0.204	No	319162	0.255	No	N/A	N/A	N/A
YWHAQ	10971	0.269	No	22630	0.144	No	25577	0.275	No
MEMO1	51072	0.201	No	76890	0.369	No	298787	0.118	No
ANKRD9	122416	0.171	No	74251	0.324	No	314457	0.193	No
ZNHIT2	741	0.154	No	29805	0.243	No	309177	0.291	No
VTA1	51534	0.153	No	66201	0.248	No	292640	0.287	No
TMEM143	55260	0.061	No	70209	0.295	No	308593	0.332	No
NNT	23530	0.218	No	18115	0.011	No	310378	0.458	No
PHAX	51808	0.123	No	56698	0.26	No	286917	0.304	No
EIF3F	8665	0.22	No	66085	0.184	No	293427	0.283	No
SORD	6652	0.145	No	20322	0.177	No	24788	0.365	No
HMGN3	9324	0.311	No	94353	0.095	No	113990	0.28	No
ACOX1	51	0.05	No	11430	0.103	No	50681	0.533	No
PPARGC1A	10891	0.173	No	19017	0.298	No	83516	0.215	No
MND1	84057	0.217	No	76915	0.374	No	295160	0.094	No
BTBD6	90135	0.198	No	399566	0.165	No	690367	0.322	No
YKT6	10652	0.173	No	56418	0.192	No	64351	0.32	No
EIF4EBP1	1978	0.303	No	13685	0.215	No	116636	0.166	No
FAM173B	134145	0.156	No	68073	0.206	No	499561	0.322	No
ECHDC2	55268	0.013	No	52430	0.19	No	298381	0.481	No
ITFG1	81533	0.15	No	71927	0.191	No	171083	0.342	No
ABHD10	55347	0.297	No	213012	0.154	No	303953	0.232	No
BCAT2	587	0.235	No	12036	0.184	No	64203	0.264	No
TRMT5	57570	0.232	No	76357	0.214	No	362754	0.237	No
ACOT4	122970	0.2	No	171282	0.129	No	681337	0.354	No
CDPF1	150383	0.112	No	72355	0.343	No	N/A	N/A	N/A
ALDH2	217	0.15	No	11669	0.154	No	29539	0.378	No
NT5C3B	115024	0.25	No	68106	0.152	No	360629	0.279	No
HAT1	8520	0.312	No	107435	0.199	No	296501	0.169	No
NUDT21	11051	0.2	No	68219	0.129	No	291877	0.351	No
CHMP3	51652	0.163	No	66700	0.143	No	282834	0.374	No
MIGA2	84895	0.011	No	108958	0.252	No	296623	0.417	No
PEX11B	8799	0.228	No	18632	0.225	No	N/A	N/A	N/A
L2HGDH	79944	0.127	No	217666	0.324	No	314196	0.228	No
GSTT2B	653689	0.02	No	14872	0.361	No	29487	0.298	No
ALG3	10195	0.242	No	208624	0.164	No	287983	0.272	No
BTF3L4	91408	0.226	No	N/A	N/A	N/A	N/A	N/A	N/A
RUVBL2	10856	0.461	No	20174	0.259	No	292907	-0.043	No
AKR1B1	231	0.233	No	11677	0.381	No	24192	0.063	No
EHHADH	1962	0.113	No	74147	0.279	No	171142	0.285	No
TMSB15A	11013	0.052	No	666244	0.494	No	286978	0.131	No
RXRG	6258	-0.012	No	20183	0.249	No	83574	0.44	No
UBAC2	337867	0.126	No	68889	0.172	No	361094	0.378	No
FNDC5	252995	0.017	No	384061	0.345	No	260327	0.314	No
RNLS	55328	0.125	No	67795	0.264	No	361751	0.286	No
SCRN3	79634	0.05	No	74616	0.215	No	311731	0.41	No
DCTN2	10540	0.232	No	69654	0.2	No	299850	0.242	No
LLPH	84298	0.181	No	66225	0.334	No	299818	0.159	No
CRYZL1	9946	0.096	No	66609	0.251	No	288256	0.327	No
POLD2	5425	0.349	No	18972	0.248	No	289758	0.077	No
HDHD5	27440	0.346	No	214932	0.103	No	N/A	N/A	N/A
LSM8	51691	0.24	No	76522	0.316	No	296913	0.117	No
CLUH	23277	0.165	No	74148	0.218	No	303300	0.29	No
TMSB15B	286527	0.048	No	666244	0.494	No	286978	0.131	No
CCDC28A	25901	0.147	No	215814	0.203	No	361454	0.322	No
EIF1	10209	0.165	No	20918	0.283	No	N/A	N/A	N/A
GMNN	51053	0.324	No	57441	0.435	No	291137	-0.088	No
DHFR	1719	0.245	No	13361	0.111	No	24312	0.315	No
MOB4	25843	0.238	No	19070	0.233	No	171050	0.2	No
PSMF1	9491	0.165	No	228769	0.055	No	689852	0.451	No
EIF5AL1	143244	0.107	No	276770	0.391	No	287444	0.173	No
PEX13	5194	0.121	No	72129	0.293	No	305581	0.257	No
[truncated: 17,132 more rows]
