# Supplementary material for: Identifying gene function and module connections by the integration of multispecies expression compendia
Source: HighWire-hosted journal article supplement (doi:10.1101/gr.251983.119), 2019-11-21
Supplement: Supplemental_Table_S6.xlsx [file Supplemental_Table_S6.xlsx]

## Sheet: Sheet1
Supplemental Table S6. qPCR primer sequences used in this study.
Gene symbol	Direction	Sequence
GAPDH	Forward	TTGGTATCGTGGAAGGACTC
	Reverse	ACAGTCTTCTGGGTGGCAGT
DDT	Forward	CGCCCACTTCTTTGAGTTTC
	Reverse	GGAAGAAGCAGCCAGTTCAC
BOLA3	Forward	GGAGCTCAGAGTGACCCAAA
	Reverse	CAAGGTCTTAAGCAGCAGCA
NDUFA2	Forward	CAAGCTCTGGGCCCGCTACG
	Reverse	CCCAGGCTCTGGGGCTGTTG
NDUFB7	Forward	CCTGCAGATGCCAACCTT
	Reverse	GCGTCCATCATCTCCTGCT
SDHB	Forward	TCTATCGATGGGACCCAGAC
	Reverse	AAGCATCCAATACCATGGGG
SDHD	Forward	GATGGACTATTCCCTGGCTG
	Reverse	AAGGCATCCCCATGAACATA
UQCRC1	Forward	TACCGGGAGCTGGTCAAG
	Reverse	GGTACCCAGTCCAGGATCAG
ATP6	Forward	TAGCCCACTTCTTACCACAAGGCA
	Reverse	TGAGTAGGTGGCCTGCAGTAATGT
